# Supplementary material for: Integrated analysis of carotenoid metabolites and transcriptome identifies key genes controlling carotenoid compositions and content in sweetpotato tuberous roots (Ipomoea batatas L.)
Source: Front Plant Sci. 2022 Oct 20;13:993682. doi: 10.3389/fpls.2022.993682 (PMC9632283; doi:10.3389/fpls.2022.993682)
Supplement: Supplementary file 2 [file DataSheet_2.xls]

## Sheet: Table S1
Table S1 The basic information, standard curves of carotenoids in sweet potato fleshes.
Compounds	Class	Molecular Weight (Da)	Ion mode	Ionization model	Q1 (Da)	Q3 (Da)	Q1'	Q3'	KEGG ID	RT	Equation	r	LLOQ (μg/mL)	ULOQ(μg/mL)
Antheraxanthin	xanthophylls	584.423	positive	[M+H]+	585.5	175.4	585.5	119.2	C08579	2.81	y = 3.08713 x + 0.00587	0.99127	0.00114504	0.00381679
Apocarotenal	xanthophylls	416.638	positive	[M+H]+	417.3	325.3	417.3	119	C19728	4.45	y = 12.62865 x - 3.96567e-4	0.99048	0.000196078	0.000653595
echinenone	xanthophylls	550.9	positive	[M+H]+	551.6	203.1	551.6	133.2	C08592	5.5	y = 104.84245 x + 0.00241	0.99077	4.9505e-05	0.000165017
Lutein	xanthophylls	568.428	positive	[M+H-18]+	551.5	175.4	551.5	495.5	C08601	3.97	y = 4.09580 x + 0.00722	0.99114	0.00059761	0.00199203
Neoxanthin	xanthophylls	600.418	positive	[M+H]+	601.4	565.5	601.4	167.2	C13431	1.92	y = 9.58998 x + 0.00231	0.99263	0.000457317	0.00152439
Phytoene	carotenes	544.501	positive	[M+H]+	545.3	81	545.3	121.2	C05421	4.77	y = 0.31801 x + 0.06991	0.99427	0.0164835	0.0549451
Violaxanthin	xanthophylls	600.418	positive	[M+H]+	601.4	565.4	601.4	221	C08614	1.37	y = 19.21851 x + 0.01079	0.99066	0.000272727	0.000909091
violaxanthin myristate	carotenoid esters	810.8	positive	[M+H]+	811.8	793.7	811.8	583.4	--	6.12	y = 9.58998 x + 0.00231	0.99263	0.000457317	0.00152439
violaxanthin palmitate	carotenoid esters	838.8	positive	[M+H]+	839.8	821.8	839.8	747.8	--	6.25	y = 9.58998 x + 0.00231	0.99263	0.000457317	0.00152439
Zeaxanthin	xanthophylls	568.428	positive	[M+H]+	569.4	477.5	569.4	175	C06098	4.59	y = 1.55523 x + 0.02137	0.99831	0.00226586	0.00755287
zeaxanthin palmitate	carotenoid esters	806.8	positive	[M+H]+	807.8	551.5	807.8	533.5	--	7.79	y = 9.58998 x + 0.00231	0.99263	0.000457317	0.00152439
β-Carotene	carotenes	536.438	positive	[M+H]+	537.6	177.1	537.6	121.3	C02094	6.23	y = 3.88371 x - 0.00451	0.99691	0.00157895	0.00526316
β-Cryptoxanthin	xanthophylls	552.433	positive	[M+H]+	553.5	177.4	553.5	119.1	C08591	5.51	y = 2.86672 x + 0.01271	0.99189	0.012	0.04
γ-Carotene	carotenes	536.438	positive	[M+H]+	537.4	177.3	537.4	119	C05435	7.34	y = 2.63151 x - 0.00395	0.99632	0.000528169	0.00176056
Q1: the molecular weight of the parent ion of the ionized substance; Q3: molecular weight of the daughter ion of the ionized substance.
Q1': the molecular weight of auxiliary qualitative parent ion; Q3': the molecular weight of auxiliary qualitative daughter ion
Limit Of Detection (LOD) , Limit Of Quantitation (LOQ)

## Sheet: Table S2
Table S2 Primers for qRT-PCR in this study
Gene ID	Gene names	Primer sequences(5’-3’)
g1106	ZEP-1-F	TTGGTTGATGGCGTTTCTGG
	ZEP-1-R	TTGTGCTGCAGGAGTGAATG
g1548	CHYB-F	AAAAGATCGGAGCGCTTCAC
	CHYB-R	GAGAGAGCAGATGTCCCGAA
g30636	NCED3-F	TGTGCTCCATTTCCCAAAGC
	NCED3-R	CTCTGCACCAAATTCCACCC
g60684	CYP707A-3-F	GGTGGAAAGTTTTGCCCCTC
	CYP707A-3-R	GCTTGGCTAGTTCATTCCCG
g4544	NSY-F	TTGAATGGGACTAGGCGGTT
	NSY-R	TTCTAACCAAGGGAGCAGGG
ZEP, zeaxanthin epoxidase; CHYB, β-carotenoid hydroxylase; NCED, 9-cis-epoxycarotenoid dioxygenase; CYP707A, (+)-abscisic acid 8'-hydroxylase; NSY, neoxanthin synthase.

## Sheet: Table S3
Table S3 RNA-Seq data in sweet potato fleshes
Sample	Raw Reads	Clean Reads	Clean Base(G)	Error Rate(%)	Q20(%)	Q30(%)	GC Content(%)
W-1	50355556	48342456	7.25	0.02	98.3	94.65	45.47
W-2	48349006	45899298	6.88	0.03	98.09	94.11	44.74
W-3	48629500	46539878	6.98	0.03	98.08	94.18	46.03
LY-1	50848702	47943236	7.19	0.03	97.9	93.7	45.9
LY-2	49091224	47383690	7.11	0.03	98.08	94.1	45.77
LY-3	57953774	55646376	8.35	0.02	98.24	94.63	46.95
Y-1	48833452	46348262	6.95	0.03	98.1	94.11	45.26
Y-2	48924224	47285466	7.09	0.02	98.19	94.36	46.12
Y-3	49169914	46496828	6.97	0.02	98.25	94.46	44.83
O-1	47822136	44730784	6.71	0.02	98.34	94.67	43.75
O-2	44719246	41452362	6.22	0.03	97.98	93.81	43.9
O-3	48043796	43981738	6.6	0.03	97.45	92.26	44.63
OR-1	49109600	46766138	7.01	0.03	97.96	93.82	46.1
OR-2	43428502	41163058	6.17	0.03	97.81	93.49	45.39
OR-3	45984244	43872578	6.58	0.03	97.88	93.63	46

## Sheet: Table S4
Table S4 DEGs in five cultivars
ID	W-1_fpkm	W-2_fpkm	W-3_fpkm	LY-1_fpkm	LY-2_fpkm	LY-3_fpkm	Y-1_fpkm	Y-2_fpkm	Y-3_fpkm	O-1_fpkm	O-2_fpkm	O-3_fpkm	OR-1_fpkm	OR-2_fpkm	OR-3_fpkm	W-1_count	W-2_count	W-3_count	LY-1_count	LY-2_count	LY-3_count	Y-1_count	Y-2_count	Y-3_count	O-1_count	O-2_count	O-3_count	OR-1_count	OR-2_count	OR-3_count	chr	start	end	strand	KEGG	KEGG pathway	NR	Swissprot	Tremble	KOG	GO	Pfam
g10	2.88	4.23	1.18	1.48	1.04	2.12	1.78	1.47	3.05	6.03	2.51	6.96	2.72	1.84	2.28	100	206	65	57	49	80	65	51	104	241	97	267	110	77	94	LG1	58690	61551	-	K03452 magnesium/proton exchanger | (RefSeq) pentatricopeptide repeat-containing protein At3g62890-like (A)	--	PREDICTED: pentatricopeptide repeat-containing protein At3g50420 [Ipomoea nil]	RecName: Full=Pentatricopeptide repeat-containing protein At3g50420;	SubName: Full=Uncharacterized protein {ECO:0000313|EnsemblPlants:Solyc02g090240.2.1};	FOG: PPR repeat	GO:0043231,intracellular membrane-bounded organelle; GO:0004519,endonuclease activity; GO:0003723,RNA binding; GO:0009451,RNA modification	PF13041.6:PPR repeat family
g10002	17.42	0.7	12.6	1.03	0.48	0	0.54	0	0	4.46	2.23	1.84	0	0.17	0.085	427	24	492	28	16	0	14	0	0	126	61	50	0	5	3	LG3	3927528	3931069	-	K10717 cytokinin trans-hydroxylase | (RefSeq) cytokinin hydroxylase-like (A)	ko00908: Zeatin biosynthesis	PREDICTED: cytochrome P450 714C2-like [Ipomoea nil]	RecName: Full=Cytochrome P450 714C2; EC=1.14.-.-;	SubName: Full=cytochrome P450 714C2-like {ECO:0000313|RefSeq:XP_018818249.1};	Cytochrome P450 CYP4/CYP19/CYP26 subfamilies	GO:0016021,integral component of membrane; GO:0020037,heme binding; GO:0005506,iron ion binding; GO:0004497,monooxygenase activity; GO:0016705,oxidoreductase activity, acting on paired donors, with incorporation or reduction of molecular oxygen	PF00067.22:Cytochrome P450
g10005	0	0	0	0	8.56	0.05	0.27	0	0.35	0.44	1.42	0	0.35	0.57	0.46	0	0	0	0	709	3	17	0	21	31	97	0	25	42	34	LG3	3954319	3960089	-	K11294 nucleolin | (RefSeq) nucleolin-like (A)	--	unnamed protein product [Ipomoea batatas]	RecName: Full=Putative ribonuclease H protein At1g65750; EC=3.1.26.4;	SubName: Full=Uncharacterized protein {ECO:0000313|EMBL:BAE79385.1};	FOG: Reverse transcriptase	GO:0046872,metal ion binding; GO:0003676,nucleic acid binding; GO:0004523,RNA-DNA hybrid ribonuclease activity	PF00078.27:Reverse transcriptase (RNA-dependent DNA polymerase)
g10009	0	0	0	1.88	1.88	1.16	0	0	0	0	0	0	0	0	0	0	0	0	94	115	57	0	0	0	0	0	0	0	0	0	LG3	3978700	3983820	-	--	--	PREDICTED: uncharacterized protein LOC109162266 [Ipomoea nil]	RecName: Full=Uncharacterized mitochondrial protein AtMg00310; AltName: Full=ORF154;	SubName: Full=Uncharacterized protein {ECO:0000313|EMBL:EMJ18520.1};	FOG: Reverse transcriptase	GO:0005739,mitochondrion	PF00078.27:Reverse transcriptase (RNA-dependent DNA polymerase)
g10011	1.15	2.22	1.45	2.89	3.76	3.44	4.1	2.92	1.81	2.7	4.2	5.69	1.89	1.89	1.89	105	284	211	292	465	342	393	266	162	284	427	574	201	207	204	LG3	3991015	4003609	+	K00924 kinase [EC:2.7.1.-] | (RefSeq) probable receptor-like protein kinase At5g47070 (A)	--	PREDICTED: U-box domain-containing protein 33-like [Ipomoea nil]	RecName: Full=U-box domain-containing protein 33; AltName: Full=Plant U-box protein 33; Includes: RecName: Full=E3 ubiquitin ligase; EC=2.3.2.27; AltName: Full=RING-type E3 ubiquitin transferase {ECO:0000305}; Includes: RecName: Full=Serine/threonine-protein kinase; EC=2.7.11.-;	SubName: Full=U-box domain-containing protein kinase family protein isoform 2 {ECO:0000313|EMBL:EOY34049.1};	FOG: Reverse transcriptase	GO:0005524,ATP binding; GO:0004674,protein serine/threonine kinase activity; GO:0004842,ubiquitin-protein transferase activity	PF07714.17:Protein tyrosine kinase
g10012	57.49	23.15	29.2	17.76	16.79	14.93	21.37	17.42	12.63	29.55	41.48	22.9	13.91	17.48	15.695	1032	584	835	353	409	292	403	312	223	611	831	455	291	378	335	LG3	4003675	4006250	-	K12471 epsin | (RefSeq) clathrin interactor 1 (A)	ko04144: Endocytosis	PREDICTED: clathrin interactor 1 isoform X1 [Ipomoea nil]	RecName: Full=Clathrin interactor EPSIN 2; AltName: Full=EPSIN-related 2;	SubName: Full=epsin-3 isoform X1 {ECO:0000313|RefSeq:XP_009773919.1};	Equilibrative nucleoside transporter protein	GO:0030136,clathrin-coated vesicle; GO:0005794,Golgi apparatus; GO:0005886,plasma membrane; GO:0005774,vacuolar membrane; GO:0030276,clathrin binding; GO:0005543,phospholipid binding; GO:0015031,protein transport	PF01417.20:ENTH domain
g10013	22.24	27.81	8.49	68.08	41.04	60.97	50.31	63.92	59.7	32.76	23.56	22.6	31.99	25.03	28.51	498	875	303	1688	1247	1488	1184	1428	1315	845	589	560	835	675	755	LG3	4012302	4013920	-	--	--	PREDICTED: fasciclin-like arabinogalactan protein 4 [Ipomoea nil]	RecName: Full=Fasciclin-like arabinogalactan protein 4; AltName: Full=Protein SALT OVERLY SENSITIVE 5; Flags: Precursor;	SubName: Full=fasciclin-like arabinogalactan protein 4 {ECO:0000313|RefSeq:XP_009777822.1};	--	GO:0031225,anchored component of membrane; GO:0046658,anchored component of plasma membrane; GO:0009897,external side of plasma membrane; GO:0005886,plasma membrane; GO:0030247,polysaccharide binding; GO:0007155,cell adhesion; GO:0010192,mucilage biosynthetic process; GO:0048354,mucilage biosynthetic process involved in seed coat development; GO:0009825,multidimensional cell growth; GO:0009651,re…	PF02469.22:Fasciclin domain
g10016	55.09	93.36	93.09	119.98	189.66	79.09	29.89	27.15	16.44	71.71	152.69	110.64	50.36	81.74	66.05	535	1274	1440	1290	2499	837	305	263	157	802	1655	1189	570	956	763	LG3	4027575	4029010	+	--	--	metallothionein-like protein [Ipomoea batatas]	--	SubName: Full=Metallothionein-like protein {ECO:0000313|EMBL:AAD54339.1};	--	GO:0046872,metal ion binding	--
g10017	0	2.23	5.59	13.71	2.68	8.18	3.77	12.9	4.86	0	3.84	0	38.23	54.12	46.175	0	19	54	92	22	54	24	78	29	0	26	0	270	395	333	LG3	4036945	4038209	+	--	--	metallothionein-like type 1 protein [Ipomoea batatas]	RecName: Full=Metallothionein-like protein type 2 A; AltName: Full=LeMT(A);	SubName: Full=Metallothionein-like type 1 protein {ECO:0000313|EMBL:BAD95644.1};	Predicted metallothionein	GO:0046872,metal ion binding	PF01439.18:Metallothionein
g1002	18.51	26.91	16.13	38.32	32.72	32.16	25.33	14.92	29.34	17.05	11.45	11.55	3.39	10.61	7	281	574	390	644	674	532	404	226	438	298	194	194	60	194	127	LG1	5830227	5837977	+	K13422 transcription factor MYC2 | (RefSeq) transcription factor MYC2-like (A)	ko04016: MAPK signaling pathway - plant; ko04075: Plant hormone signal transduction	PREDICTED: transcription factor bHLH25-like [Ipomoea nil]	RecName: Full=Transcription factor bHLH25; AltName: Full=Basic helix-loop-helix protein 25; Short=AtbHLH25; Short=bHLH 25; AltName: Full=Transcription factor EN 29; AltName: Full=bHLH transcription factor bHLH025;	SubName: Full=Transcription factor HAND2/Transcription factor TAL1/TAL2/LYL1 {ECO:0000313|EMBL:PIN24638.1};	--	GO:0005634,nucleus; GO:0003677,DNA binding; GO:0003700,DNA-binding transcription factor activity; GO:0046983,protein dimerization activity; GO:0006355,regulation of transcription, DNA-templated; GO:0006351,transcription, DNA-templated	PF00010.26:Helix-loop-helix DNA-binding domain
g10021	5.22	8.43	15.3	3.2	3.84	3.87	14.77	9.7	11.54	12.21	7.33	9.65	6.16	6.44	6.3	125	284	584	85	125	101	372	232	272	337	196	256	172	186	179	LG3	4048199	4051150	-	K19044 E3 ubiquitin-protein ligase XBAT32/33 [EC:2.3.2.27] | (RefSeq) E3 ubiquitin-protein ligase XBAT33-like (A)	--	PREDICTED: putative E3 ubiquitin-protein ligase XBAT31 [Ipomoea nil]	RecName: Full=Putative E3 ubiquitin-protein ligase XBAT31; EC=2.3.2.27; AltName: Full=Ankyrin repeat domain and RING finger-containing protein XBAT31; AltName: Full=Protein XB3 homolog 1; AltName: Full=RING-type E3 ubiquitin transferase XB31;	SubName: Full=putative E3 ubiquitin-protein ligase XBAT31 {ECO:0000313|RefSeq:XP_016486501.1};	--	GO:0046872,metal ion binding; GO:0016740,transferase activity; GO:0016567,protein ubiquitination	PF12796.7:Ankyrin repeats (3 copies)
g10023	8.97	13.37	7.46	7	6.77	7.89	10.9	19.34	14.61	3.99	4.49	1.45	5.31	4.62	4.965	213	446	282	184	218	204	272	458	341	109	119	38	147	132	140	LG3	4070118	4072040	-	--	--	PREDICTED: dof zinc finger protein DOF3.6-like isoform X2 [Ipomoea nil]	RecName: Full=Dof zinc finger protein DOF2.4; Short=AtDOF2.4;	SubName: Full=dof zinc finger protein DOF2.4-like {ECO:0000313|RefSeq:XP_016444808.1};	--	GO:0005634,nucleus; GO:0003700,DNA-binding transcription factor activity; GO:0046872,metal ion binding; GO:0043565,sequence-specific DNA binding; GO:0044212,transcription regulatory region DNA binding; GO:0006355,regulation of transcription, DNA-templated; GO:0006351,transcription, DNA-templated	--
g10024	222.25	325.07	244.88	567.24	820.58	599.28	335.87	326.31	360.1	402.08	419.41	387.69	234.7	244.06	239.38	6366	13083	11173	17988	31891	18705	10109	9324	10145	13264	13408	12289	7835	8419	8127	LG3	4086275	4089064	+	K03283 heat shock 70kDa protein 1/2/6/8 | (RefSeq) heat shock cognate 70 kDa protein 2-like (A)	ko03040: Spliceosome; ko04141: Protein processing in endoplasmic reticulum; ko04144: Endocytosis	PREDICTED: heat shock cognate 70 kDa protein 2-like [Ipomoea nil]	RecName: Full=Heat shock cognate 70 kDa protein;	SubName: Full=Uncharacterized protein {ECO:0000313|EMBL:CDP09040.1};	Molecular chaperones HSP70/HSC70, HSP70 superfamily	GO:0005524,ATP binding	PF00012.20:Hsp70 protein
g10025	8.07	15.8	12.06	16.67	16.18	20.53	38.14	44.39	48.53	20.52	20.68	36.02	16.16	17.77	16.965	192	528	457	439	522	532	953	1053	1135	562	549	948	448	509	479	LG3	4092104	4096340	-	--	--	PREDICTED: uncharacterized protein LOC109172556 [Ipomoea nil]	--	SubName: Full=Uncharacterized protein {ECO:0000313|EMBL:CDP09038.1};	--	GO:0016021,integral component of membrane	--
g10026	3.22	2.98	4.15	4.14	9.72	4.86	1.89	3.58	6.28	5.32	5.14	6.46	2.38	3.11	2.745	73	95	150	104	299	120	45	81	140	139	130	162	63	85	74	LG3	4099001	4102770	-	--	--	PREDICTED: protein ROS1-like [Ipomoea nil]	--	SubName: Full=Repressor of silencing 1 {ECO:0000313|EMBL:BAF52855.1}; SubName: Full=protein ROS1-like {ECO:0000313|RefSeq:XP_016494117.1, ECO:0000313|RefSeq:XP_016494118.1, ECO:0000313|RefSeq:XP_016494119.1};	--	GO:0051539,4 iron, 4 sulfur cluster binding; GO:0003824,catalytic activity; GO:0006284,base-excision repair	PF15748.5:Centriole, cilia and spindle-associated
g10031	133.43	161.77	133.13	142.49	61.57	103.72	146.41	130.22	129.9	91.35	86.36	54.2	129.41	160.18	144.795	1059	1804	1683	1252	663	897	1221	1031	1014	835	765	476	1197	1531	1364	LG3	4130725	4131274	+	K11254 histone H4 | (RefSeq) histone H4 (A)	--	hypothetical protein SETIT_032292mg, partial [Setaria italica]	RecName: Full=Histone H4;	RecName: Full=Histone H4 {ECO:0000256|RuleBase:RU000528}; Flags: Fragment;	Histone H4	GO:0009507,chloroplast; GO:0005829,cytosol; GO:0000788,nuclear nucleosome; GO:0005730,nucleolus; GO:0005886,plasma membrane; GO:0009506,plasmodesma; GO:0009579,thylakoid; GO:0005774,vacuolar membrane; GO:0003677,DNA binding; GO:0042393,histone binding; GO:0046982,protein heterodimerization activity; GO:0006334,nucleosome assembly; GO:0009414,response to water deprivation	PF15511.6:Centromere kinetochore component CENP-T histone fold
g10034	0.93	0.81	0.01	3.78	0.88	1.36	1.68	1.9	0.52	2.62	3.01	2.2	2.95	3.56	3.255	63	77	1	285	81	101	120	129	35	205	229	166	234	292	263	LG3	4141414	4151250	-	K11254 histone H4 | (RefSeq) histone H4 (A)	--	PREDICTED: uncharacterized protein LOC109193863 [Ipomoea nil]	RecName: Full=Histone H4 variant TH091;	SubName: Full=Uncharacterized protein {ECO:0000313|EnsemblPlants:TRIAE_CS42_6BS_TGACv1_514394_AA1659220.1};	FOG: Transposon-encoded proteins with TYA, reverse transcriptase, integrase domains in various combinations	GO:0000786,nucleosome; GO:0005634,nucleus; GO:0003677,DNA binding; GO:0046982,protein heterodimerization activity; GO:0006334,nucleosome assembly	PF00665.26:Integrase core domain
g10035	48.9	58.31	105.27	74.95	33.57	58.6	58.56	36.83	40.88	97.71	74.14	78.96	98.74	106.04	102.39	422	707	1447	716	393	551	531	317	347	971	714	754	993	1102	1048	LG3	4153395	4153992	+	K11254 histone H4 | (RefSeq) histone H4 (A)	--	hypothetical protein SETIT_032292mg, partial [Setaria italica]	RecName: Full=Histone H4;	RecName: Full=Histone H4 {ECO:0000256|RuleBase:RU000528}; Flags: Fragment;	Histone H4	GO:0009507,chloroplast; GO:0005829,cytosol; GO:0000788,nuclear nucleosome; GO:0005730,nucleolus; GO:0005886,plasma membrane; GO:0009506,plasmodesma; GO:0009579,thylakoid; GO:0005774,vacuolar membrane; GO:0003677,DNA binding; GO:0042393,histone binding; GO:0046982,protein heterodimerization activity; GO:0006334,nucleosome assembly; GO:0009414,response to water deprivation	PF15511.6:Centromere kinetochore component CENP-T histone fold
g10036	0	1.12	2.01	1.6	1.41	1.58	1.64	3.45	0	0	0	0	0.51	0	0.255	0	32	65	36	39	35	35	70	0	0	0	0	12	0	6	LG3	4157005	4160932	+	--	--	PREDICTED: uncharacterized protein LOC109172590 [Ipomoea nil]	--	SubName: Full=uncharacterized protein LOC107855749 {ECO:0000313|RefSeq:XP_016556240.1};	--	GO:0016021,integral component of membrane	--
g10044	4.24	2.81	4.22	1.8	1.53	1.65	3.26	1.06	0	1.31	0.99	0.7	0.31	0.95	0.63	104	97	165	49	51	44	84	26	0	37	27	19	9	28	19	LG3	4207866	4210960	-	--	--	PREDICTED: protein UPSTREAM OF FLC-like isoform X2 [Ipomoea nil]	RecName: Full=Protein UPSTREAM OF FLC;	SubName: Full=protein UPSTREAM OF FLC-like {ECO:0000313|RefSeq:XP_016462372.1};	--	--	PF06136.13:Domain of unknown function (DUF966)
g10048	1.79	1.12	0.97	0.31	1.21	0.06	0.15	2.65	0.16	9.65	10.29	3.13	0.11	3.5	1.805	57	50	49	11	52	2	5	84	5	353	365	110	4	134	69	LG3	4248111	4251400	-	K07466 replication factor A1 | (RefSeq) replication protein A 70 kDa DNA-binding subunit B-like (A)	ko03030: DNA replication; ko03420: Nucleotide excision repair; ko03430: Mismatch repair; ko03440: Homologous recombination	putative transposase [Ipomoea tricolor]	RecName: Full=Replication protein A 70 kDa DNA-binding subunit B; Short=AtRPA70B; AltName: Full=AtRPA1-5; AltName: Full=Replication factor A protein 1B; AltName: Full=Replication protein A 1B; Short=AtRPA1B;	SubName: Full=Putative transposase {ECO:0000313|EMBL:BAF64710.1};	Single-stranded DNA-binding replication protein A (RPA), large (70 kD) subunit and related ssDNA-binding proteins	GO:0005634,nucleus; GO:0003677,DNA binding; GO:0046872,metal ion binding; GO:0006310,DNA recombination; GO:0006281,DNA repair; GO:0006260,DNA replication; GO:0010224,response to UV-B	PF08646.10:Replication factor-A C terminal domain
g10049	3.23	3.51	2.29	12.82	10.5	16.26	4.06	3.6	0	22.95	33.17	17	21.79	22.55	22.17	53	81	60	233	234	291	70	59	0	434	608	309	417	446	432	LG3	4252715	4254563	+	K09422 transcription factor MYB, plant | (RefSeq) myb-related protein MYBAS2-like (A)	--	PREDICTED: myb-related protein MYBAS2-like isoform X1 [Ipomoea nil]	RecName: Full=Transcription factor MYB59; AltName: Full=Myb-related protein 59; Short=AtMYB59;	SubName: Full=Transcription factor myb48 {ECO:0000313|EMBL:OIT02065.1};	Transcription factor, Myb superfamily	GO:0005634,nucleus; GO:0003700,DNA-binding transcription factor activity; GO:0000981,DNA-binding transcription factor activity, RNA polymerase II-specific; GO:0043565,sequence-specific DNA binding; GO:0001135,RNA polymerase II transcription regulator recruiting activity; GO:0044212,transcription regulatory region DNA binding; GO:0030154,cell differentiation; GO:0006357,regulation of transcription…	PF00249.31:Myb-like DNA-binding domain
g1005	1.74	1.2	1.56	0.68	0.23	0	0	0	0	0	0	0	0	0	0	39	38	56	17	7	0	0	0	0	0	0	0	0	0	0	LG1	5855127	5857673	+	--	--	PREDICTED: transcription factor bHLH18-like [Ipomoea nil]	RecName: Full=Transcription factor bHLH25; AltName: Full=Basic helix-loop-helix protein 25; Short=AtbHLH25; Short=bHLH 25; AltName: Full=Transcription factor EN 29; AltName: Full=bHLH transcription factor bHLH025;	SubName: Full=transcription factor bHLH18-like {ECO:0000313|RefSeq:XP_016434460.1};	--	GO:0005634,nucleus; GO:0003677,DNA binding; GO:0003700,DNA-binding transcription factor activity; GO:0046983,protein dimerization activity; GO:0006355,regulation of transcription, DNA-templated; GO:0006351,transcription, DNA-templated	PF00010.26:Helix-loop-helix DNA-binding domain
g10052	2.45	3.66	1.66	6.46	4.16	7.26	1.55	0	0	4.69	1.97	1.87	2.64	1.98	2.31	39	82	42	114	90	126	26	0	0	86	35	33	49	38	44	LG3	4282895	4284827	+	--	--	PREDICTED: uncharacterized protein LOC109172663 isoform X2 [Ipomoea nil]	--	SubName: Full=uncharacterized protein LOC104234634 {ECO:0000313|RefSeq:XP_009786531.1};	--	--	PF07795.11:Protein of unknown function (DUF1635)
g10053	1.2	0	0.8	4.78	2.36	3.09	0	0	0	0	0.5	0	0.89	1.06	0.975	15	0	16	66	40	42	0	0	0	0	7	0	13	16	15	LG3	4285275	4286139	+	K10664 E3 ubiquitin-protein ligase ATL6/9/15/31/42/55 [EC:2.3.2.27] | (RefSeq) E3 ubiquitin-protein ligase ATL42-like (A)	--	PREDICTED: E3 ubiquitin-protein ligase Os04g0590900-like [Ipomoea nil]	RecName: Full=RING-H2 finger protein ATL16; EC=2.3.2.27 {ECO:0000305}; AltName: Full=RING-type E3 ubiquitin transferase ATL16 {ECO:0000305};	SubName: Full=RING-H2 finger protein ATL66-like {ECO:0000313|RefSeq:XP_016470452.1};	FOG: Predicted E3 ubiquitin ligase	GO:0016021,integral component of membrane; GO:0046872,metal ion binding; GO:0061630,ubiquitin protein ligase activity; GO:0043161,proteasome-mediated ubiquitin-dependent protein catabolic process	PF13639.6:Ring finger domain
g10056	0.48	2.34	0.75	1.08	0.84	1.64	0	0	0	3.01	3.8	7.07	1.13	0.64	0.885	8	55	20	20	19	30	0	0	0	58	71	131	22	13	18	LG3	4305660	4307349	+	--	--	PREDICTED: protein SODIUM POTASSIUM ROOT DEFECTIVE 3-like [Ipomoea nil]	RecName: Full=Protein SODIUM POTASSIUM ROOT DEFECTIVE 3 {ECO:0000303|PubMed:21193571}; Short=NaKR3 {ECO:0000303|PubMed:21193571}; AltName: Full=Heavy metal-associated plant protein 4 {ECO:0000303|PubMed:23368984}; Short=AtHPP04 {ECO:0000303|PubMed:23368984};	SubName: Full=uncharacterized protein LOC107846878 {ECO:0000313|RefSeq:XP_016546631.1};	Copper chaperone	GO:0005737,cytoplasm; GO:0046872,metal ion binding; GO:0030001,metal ion transport	--
g10061	11.59	19.46	16.09	14.84	13.51	13.68	31.47	39.35	30.92	19.67	16.17	29.66	16.62	12.48	14.55	480	1132	1061	680	759	617	1369	1625	1259	938	747	1359	802	622	712	LG3	4338200	4344074	+	K00924 kinase [EC:2.7.1.-] | (RefSeq) probable receptor-like protein kinase At5g47070 (A)	--	PREDICTED: receptor-like protein kinase HERK 1 [Nicotiana attenuata]	RecName: Full=Receptor-like protein kinase HERK 1; EC=2.7.11.-; AltName: Full=Protein HERCULES RECEPTOR KINASE 1; Flags: Precursor;	SubName: Full=Receptor-like protein kinase THESEUS 1 {ECO:0000313|EMBL:PHT68785.1};	Serine/threonine protein kinase	GO:0016021,integral component of membrane; GO:0005886,plasma membrane; GO:0009506,plasmodesma; GO:0005524,ATP binding; GO:0004672,protein kinase activity; GO:0004674,protein serine/threonine kinase activity; GO:0009741,response to brassinosteroid; GO:0009826,unidimensional cell growth	PF07714.17:Protein tyrosine kinase
g10064	0	0	0	2.1	1.34	0	0.69	0	0	2.33	3.9	3.8	0	0.66	0.33	0	0	0	32	25	0	10	0	0	37	60	58	0	11	6	LG3	4367147	4368895	-	--	--	PREDICTED: zinc finger protein HD1 isoform X2 [Ipomoea nil]	--	SubName: Full=two-component response regulator-like APRR5 {ECO:0000313|RefSeq:XP_016481743.1};	--	GO:0005634,nucleus	PF06203.14:CCT motif
g10065	2.33	4.14	4.15	0	0.32	0	1.92	0.92	0.68	3.03	2.69	7.97	0.84	1.88	1.36	38	95	108	0	7	0	33	15	11	57	49	144	16	37	27	LG3	4384211	4385545	-	--	--	PREDICTED: chitinase 2-like [Ipomoea nil]	RecName: Full=Chitinase 2; EC=3.2.1.14; AltName: Full=Tulip bulb chitinase-2; Short=TBC-2;	SubName: Full=Uncharacterized protein {ECO:0000313|EMBL:CCB43621.1};	--	GO:0008061,chitin binding; GO:0004568,chitinase activity; GO:0006032,chitin catabolic process; GO:0000272,polysaccharide catabolic process	PF00704.28:Glycosyl hydrolases family 18
g10066	0.19	0.3	2.14	1.39	0.82	0.77	0.5	0	0	3.39	3.91	2.65	0	0.28	0.14	10	23	183	83	60	45	28	0	0	210	235	158	0	18	9	LG3	4402510	4409364	+	K10398 kinesin family member 11 | (RefSeq) kinesin-like protein KIN-5D (A)	--	PREDICTED: kinesin-like protein KIN-5D isoform X1 [Ipomoea nil]	RecName: Full=Kinesin-like protein KIN-5D {ECO:0000305};	SubName: Full=125 kDa kinesin-related protein-like isoform X2 {ECO:0000313|RefSeq:XP_016503928.1};	Kinesin-like protein	GO:0005737,cytoplasm; GO:0005871,kinesin complex; GO:0005874,microtubule; GO:0005886,plasma membrane; GO:0005819,spindle; GO:0005524,ATP binding; GO:0008574,ATP-dependent microtubule motor activity, plus-end-directed; GO:0008017,microtubule binding; GO:0007018,microtubule-based movement	PF00225.23:Kinesin motor domain
g10067	4.21	6.81	7.95	9.12	23.09	12.16	8.48	15.27	13.63	8.75	6.95	10.72	11.1	10.08	10.59	298	677	896	715	2217	938	631	1078	949	713	549	840	916	859	888	LG3	4409490	4414625	-	K11671 nuclear factor related to kappa-B-binding protein | (RefSeq) uncharacterized LOC109172884 (A)	--	PREDICTED: uncharacterized protein LOC109172884 [Ipomoea nil]	--	SubName: Full=Uncharacterized protein {ECO:0000313|EMBL:CDP08967.1};	R-kappa-B and related transcription factors	GO:0031011,Ino80 complex	--
g10074	23.85	28.31	16.27	11.8	12.33	11.44	16.27	20.46	16.37	13.18	9.02	8.59	13.47	7.69	10.58	597	996	649	327	419	312	428	511	403	380	252	238	393	232	313	LG3	4456467	4459895	-	K04371 mitogen-activated protein kinase 1/3 [EC:2.7.11.24] | (RefSeq) mitogen-activated protein kinase homolog NTF6-like (A)	--	PREDICTED: mitogen-activated protein kinase homolog NTF6-like [Ipomoea nil]	RecName: Full=Mitogen-activated protein kinase homolog NTF6; EC=2.7.11.24; AltName: Full=P43;	RecName: Full=Mitogen-activated protein kinase {ECO:0000256|RuleBase:RU361165, ECO:0000256|SAAS:SAAS00652812}; EC=2.7.11.24 {ECO:0000256|RuleBase:RU361165, ECO:0000256|SAAS:SAAS00652812};	Mitogen-activated protein kinase	GO:0005622,intracellular; GO:0005524,ATP binding; GO:0004707,MAP kinase activity	PF00069.25:Protein kinase domain
g10077	31.66	60.33	16.85	13.44	3.98	7.9	30.55	7.31	12.61	14.95	10.46	5.67	28.92	26.41	27.665	217	581	184	102	37	59	220	50	85	118	80	43	231	218	225	LG3	4467311	4467785	-	--	--	hypothetical protein A4A49_06179 [Nicotiana attenuata]	--	SubName: Full=Uncharacterized protein {ECO:0000313|EMBL:OIT02932.1};	--	--	--
g10078	30.99	54.43	25.72	23.07	10	9.89	10.38	9.6	15.82	24.6	28.48	26.8	7.88	14.03	10.955	233	575	308	192	102	81	82	72	117	213	239	223	69	127	98	LG3	4476930	4477450	-	--	--	hypothetical protein A4A49_06179 [Nicotiana attenuata]	--	SubName: Full=Uncharacterized protein {ECO:0000313|EMBL:OIT02932.1};	--	--	--
g1008	4.43	4.61	6.34	13.4	14.03	15.91	7.33	6.42	3.86	11.58	8.74	13.5	6.61	5.94	6.275	218	319	497	730	937	853	379	315	187	656	480	735	379	352	366	LG1	5892397	5895951	+	K00924 kinase [EC:2.7.1.-] | (RefSeq) receptor-like protein kinase HSL1 (A)	--	PREDICTED: LRR receptor-like serine/threonine-protein kinase HSL2 isoform X1 [Ipomoea nil]	RecName: Full=LRR receptor-like serine/threonine-protein kinase HSL2; EC=2.7.11.1; AltName: Full=Protein HAESA-LIKE2; Flags: Precursor;	SubName: Full=Lrr receptor-like serinethreonine-protein kinase hsl2 {ECO:0000313|EMBL:OIT19832.1};	--	GO:0016021,integral component of membrane; GO:0005886,plasma membrane; GO:0005524,ATP binding; GO:0004674,protein serine/threonine kinase activity; GO:0010102,lateral root morphogenesis; GO:0010468,regulation of gene expression	PF00069.25:Protein kinase domain
g10084	12.73	37.29	18.18	30.23	10.38	18.61	0	4.74	2.52	11.35	8.18	11.4	41.19	31.16	36.175	113	465	257	297	125	180	0	42	22	116	81	112	426	333	380	LG3	4501906	4502520	-	--	--	hypothetical protein A4A49_06179 [Nicotiana attenuata]	--	SubName: Full=Uncharacterized protein {ECO:0000313|EMBL:OIT02932.1};	--	--	--
g10085	1.14	1.16	0	1.91	1.32	1.94	0	0	0	0	0.22	0	0.07	0	0.035	14	20	0	26	22	26	0	0	0	0	3	0	1	0	1	LG3	4505895	4507850	+	--	--	PREDICTED: uncharacterized protein LOC109158093 [Ipomoea nil]	--	SubName: Full=mRNA, 1290 bp sequence {ECO:0000313|EMBL:BAA89236.1};	--	GO:0016021,integral component of membrane	PF04819.12:Family of unknown function (DUF716)
g10086	5.33	1	11.22	0	0	0.14	0	0	0	0	0	0	0	0	0	34	9	114	0	0	1	0	0	0	0	0	0	0	0	0	LG3	4509079	4509520	-	--	--	--	--	--	--	--	--
g10088	108.78	111.59	74.79	12.65	4.85	14.65	65.42	54.73	21.21	17.26	8.15	9.61	21.98	35.69	28.835	777	1120	851	100	47	114	491	390	149	142	65	76	183	307	245	LG3	4526566	4527060	-	--	--	--	--	--	--	--	--
g10094	5.62	7.44	8.34	2.32	0.46	0	3.37	1.86	8.87	0.19	1.86	3.44	1.25	2.24	1.745	127	236	300	58	14	0	80	42	197	5	47	86	33	61	47	LG3	4579586	4581150	-	--	--	--	--	--	--	--	--
g10095	1.74	5.07	3.58	2.68	5.85	2.64	1.44	1.13	3.08	0.98	0.9	1.52	1.63	1.02	1.325	54	221	177	92	246	89	47	35	94	35	31	52	59	38	49	LG3	4586956	4597270	-	K12449 UDP-apiose/xylose synthase | (RefSeq) UDP-D-apiose/UDP-D-xylose synthase 2-like (A)	ko00520: Amino sugar and nucleotide sugar metabolism	PREDICTED: UDP-D-apiose/UDP-D-xylose synthase 2-like [Ipomoea nil]	RecName: Full=UDP-D-apiose/UDP-D-xylose synthase 2;	SubName: Full=dTDP-glucose 4-6-dehydratase/UDP-glucuronic acid decarboxylase {ECO:0000313|EMBL:PIN09899.1}; EC=4.1.1.35 {ECO:0000313|EMBL:PIN09899.1};	dTDP-glucose 4-6-dehydratase/UDP-glucuronic acid decarboxylase	GO:0048046,apoplast; GO:0005737,cytoplasm; GO:0005829,cytosol; GO:0003824,catalytic activity; GO:0050662,coenzyme binding; GO:0071555,cell wall organization	PF01370.21:NAD dependent epimerase/dehydratase family
g10099	67.23	90.1	50.01	103.01	114.99	101.53	58.46	28.2	44.17	63.27	58.85	61.46	50.71	69.15	59.93	1563	2943	1852	2651	3627	2572	1428	654	1010	1694	1527	1581	1374	1936	1655	LG3	4618335	4622499	+	K09284 AP2-like factor, euAP2 lineage | (RefSeq) AP2-like ethylene-responsive transcription factor TOE3 (A)	--	PREDICTED: AP2-like ethylene-responsive transcription factor TOE3 isoform X2 [Ipomoea nil]	RecName: Full=Floral homeotic protein APETALA 2 {ECO:0000303|PubMed:7919989};	SubName: Full=ethylene-responsive transcription factor RAP2-7-like isoform X1 {ECO:0000313|RefSeq:XP_009784819.1};	--	GO:0005634,nucleus; GO:0003677,DNA binding; GO:0003700,DNA-binding transcription factor activity; GO:0030154,cell differentiation; GO:0009908,flower development; GO:0010073,meristem maintenance; GO:0048481,plant ovule development; GO:0048316,seed development; GO:0010093,specification of floral organ identity; GO:0006351,transcription, DNA-templated	PF00847.20:AP2 domain
g1010	2.6	0	3.67	0.54	0.59	0.32	0	0	0	0	0.36	0	0	0.46	0.23	52	0	117	12	16	7	0	0	0	0	8	0	0	11	6	LG1	5913217	5914604	+	--	--	PREDICTED: uncharacterized protein LOC104112009 [Nicotiana tomentosiformis]	--	SubName: Full=uncharacterized protein LOC107761547 {ECO:0000313|RefSeq:XP_016435257.1};	--	--	--
g10102	99.31	60.48	108.18	45.12	121.13	36.29	65.55	64.31	64.24	16.98	18.05	10.17	129.7	189.74	159.72	2356	2016	4088	1185	3899	938	1634	1522	1499	464	478	267	3586	5421	4504	LG3	4639202	4641694	+	K20536 mitogen-activated protein kinase 3 [EC:2.7.11.24] | (RefSeq) mitogen-activated protein kinase 3-like (A)	ko04016: MAPK signaling pathway - plant; ko04626: Plant-pathogen interaction	mitogen-activated protein kinase [Ipomoea batatas]	RecName: Full=Mitogen-activated protein kinase 3; Short=AtMPK3; Short=MAP kinase 3; EC=2.7.11.24;	RecName: Full=Mitogen-activated protein kinase {ECO:0000256|RuleBase:RU361165, ECO:0000256|SAAS:SAAS00652812}; EC=2.7.11.24 {ECO:0000256|RuleBase:RU361165, ECO:0000256|SAAS:SAAS00652812};	Mitogen-activated protein kinase	GO:0005737,cytoplasm; GO:0005634,nucleus; GO:0005524,ATP binding; GO:0004707,MAP kinase activity; GO:0004672,protein kinase activity; GO:0009738,abscisic acid-activated signaling pathway; GO:0010120,camalexin biosynthetic process; GO:0042742,defense response to bacterium; GO:0050832,defense response to fungus; GO:0010229,inflorescence development; GO:0048481,plant ovule development; GO:0009626,pl…	PF00069.25:Protein kinase domain
g10103	6.18	6.71	11.1	2.71	2.28	2.18	3.9	6.29	2.12	6.74	7.01	7.93	0.71	0.37	0.54	208	317	595	101	104	80	138	211	70	261	263	295	28	15	22	LG3	4643632	4648436	+	K14638 solute carrier family 15 (peptide/histidine transporter), member 3/4 | (RefSeq) protein NRT1/ PTR FAMILY 2.7-like (A)	--	PREDICTED: protein NRT1/ PTR FAMILY 2.7-like [Ipomoea nil]	RecName: Full=Protein NRT1/ PTR FAMILY 2.7; Short=AtNPF2.7; AltName: Full=Nitrate excretion transporter 1;	SubName: Full=Uncharacterized protein {ECO:0000313|EnsemblPlants:Solyc11g072570.1.1};	H+/oligopeptide symporter	GO:0016021,integral component of membrane; GO:0005886,plasma membrane; GO:0010542,nitrate efflux transmembrane transporter activity; GO:0042128,nitrate assimilation; GO:0015706,nitrate transport; GO:0010447,response to acidic pH	PF00854.21:POT family
g10108	16.67	23	9.35	27.51	29.54	36.01	16.54	16.12	24.4	59.11	55.42	60.51	37.41	33.47	35.44	421	816	376	769	1012	991	439	406	606	1719	1562	1691	1101	1018	1060	LG3	4686972	4693802	+	--	--	PREDICTED: dof zinc finger protein DOF2.1-like [Ipomoea nil]	RecName: Full=Dof zinc finger protein DOF5.3; Short=AtDOF5.3;	SubName: Full=Uncharacterized protein {ECO:0000313|EMBL:CDP08935.1};	--	GO:0005634,nucleus; GO:0003700,DNA-binding transcription factor activity; GO:0046872,metal ion binding; GO:0044212,transcription regulatory region DNA binding; GO:0006355,regulation of transcription, DNA-templated; GO:0048364,root development; GO:0006351,transcription, DNA-templated	PF02701.15:Dof domain, zinc finger
g1011	0	2.49	0	2.02	2.46	2.18	0	1.89	0	0.33	0.55	0	0	0.71	0.355	0	102	0	65	97	69	0	55	0	11	18	0	0	25	13	LG1	5916576	5918592	-	--	--	PREDICTED: uncharacterized protein DDB_G0290685-like [Ipomoea nil]	--	SubName: Full=dentin sialophosphoprotein-like {ECO:0000313|RefSeq:XP_016436760.1};	--	GO:0016021,integral component of membrane	--
g10110	100.82	114.71	108.2	266.8	137.31	279.04	106.57	121.34	90.89	180.52	178.27	177.78	317.65	315.53	316.59	1625	2598	2778	4761	3003	4901	1805	1951	1441	3351	3207	3171	5967	6125	6046	LG3	4705342	4708283	+	--	--	PREDICTED: tetraspanin-3-like [Ipomoea nil]	RecName: Full=Tetraspanin-3;	SubName: Full=tetraspanin-3-like {ECO:0000313|RefSeq:XP_016462454.1, ECO:0000313|RefSeq:XP_016462455.1};	--	GO:0016021,integral component of membrane; GO:0005886,plasma membrane; GO:0009506,plasmodesma	PF00335.20:Tetraspanin family
g10111	34.13	17.76	16.66	6.6	7.37	5.7	10.72	11.57	9.44	5.68	5.61	8.44	2.07	9.04	5.555	621	454	483	133	182	113	205	210	169	119	114	170	44	198	121	LG3	4708721	4712507	-	--	--	PREDICTED: phosphatidylinositol transfer protein 1-like [Ipomoea nil]	--	SubName: Full=Uncharacterized protein {ECO:0000313|EMBL:CDP08931.1};	Phosphatidylinositol transfer protein	GO:0005622,intracellular; GO:0005548,phospholipid transporter activity	PF02121.18:Phosphatidylinositol transfer protein
g10114	3.41	6.64	3.2	1.78	5.85	1.37	4.39	5.11	6.99	15.16	21.85	11.43	18.53	8.86	13.695	71	194	106	41	165	31	96	106	143	363	507	263	449	222	336	LG3	4737262	4739238	+	--	--	PREDICTED: protein indeterminate-domain 9-like [Ipomoea nil]	RecName: Full=Zinc finger protein JACKDAW; AltName: Full=ID1-like zinc finger protein 3 {ECO:0000303|Ref.2}; AltName: Full=Protein indeterminate-domain 10 {ECO:0000303|PubMed:16784536};	SubName: Full=Protein indeterminate-domain 9 {ECO:0000313|EMBL:OIT26399.1};	FOG: Zn-finger	GO:0005634,nucleus; GO:0003677,DNA binding; GO:0003700,DNA-binding transcription factor activity; GO:0046872,metal ion binding; GO:0008356,asymmetric cell division; GO:0051302,regulation of cell division; GO:0045604,regulation of epidermal cell differentiation; GO:0010075,regulation of meristem growth; GO:0006355,regulation of transcription, DNA-templated; GO:0048364,root development; GO:0006351,…	PF00096.26:Zinc finger, C2H2 type
g10115	17.49	35.09	20.23	13.38	14.2	29.64	30.43	46.26	46.09	63.62	49.76	62.77	9.24	11.97	10.605	216	609	398	183	238	399	395	570	560	905	686	858	133	178	156	LG3	4746242	4747097	+	--	--	--	--	--	--	--	--
g10116	14.28	12.21	6.75	0.84	2.77	1.46	5.3	3.06	6.56	3.19	6.1	10.59	3.64	0.81	2.225	323	388	243	21	85	36	126	69	146	83	154	265	96	22	59	LG3	4762312	4766767	-	--	--	PREDICTED: uncharacterized protein LOC109147160 [Ipomoea nil]	--	SubName: Full=Putative transposase En/Spm {ECO:0000313|EMBL:AAS79611.1};	--	--	PF03004.14:Plant transposase (Ptta/En/Spm family)
g10118	0	0	0	0.55	0.74	0.32	0	0	0.7	0	0.28	0	0.34	0.22	0.28	0	0	0	23	38	13	0	0	26	0	12	0	15	10	13	LG3	4774652	4777627	-	K19613 leucine-rich repeat protein SHOC2 | (RefSeq) receptor like protein 30-like (A)	--	PREDICTED: receptor-like protein 12 [Ipomoea nil]	RecName: Full=Receptor like protein 6 {ECO:0000303|PubMed:18434605}; Short=AtRLP6 {ECO:0000303|PubMed:18434605}; Flags: Precursor;	SubName: Full=Uncharacterized protein {ECO:0000313|EMBL:EYU39802.1};	FOG: Leucine rich repeat	GO:0016021,integral component of membrane; GO:0016020,membrane	PF13855.6:Leucine rich repeat
g10119	0	0	0	0.5	1.25	0.54	0	0	0	0.41	0.1	0	0.25	0.34	0.295	0	0	0	34	104	36	0	0	0	29	7	0	18	25	22	LG3	4783812	4792095	+	K19613 leucine-rich repeat protein SHOC2 | (RefSeq) receptor like protein 30-like (A)	--	PREDICTED: receptor-like protein 12 [Ipomoea nil]	RecName: Full=Receptor like protein 6 {ECO:0000303|PubMed:18434605}; Short=AtRLP6 {ECO:0000303|PubMed:18434605}; Flags: Precursor;	SubName: Full=Uncharacterized protein {ECO:0000313|EMBL:EYU39802.1};	FOG: Leucine rich repeat	GO:0016021,integral component of membrane; GO:0016020,membrane	PF13855.6:Leucine rich repeat
g10120	0	0	0	0.74	1.71	1.51	0	0	0	0	0	0	4.44	1.69	3.065	0	0	0	23	65	46	0	0	0	0	0	0	145	57	101	LG3	4792142	4794600	+	K19613 leucine-rich repeat protein SHOC2 | (RefSeq) receptor like protein 30-like (A)	--	PREDICTED: receptor-like protein 12 [Ipomoea nil]	RecName: Full=Receptor-like protein 9DC3 {ECO:0000312|EMBL:AAT77550.1}; Flags: Precursor;	SubName: Full=Uncharacterized protein {ECO:0000313|EMBL:EYU39802.1};	FOG: Leucine rich repeat	GO:0016021,integral component of membrane; GO:0005886,plasma membrane; GO:0050832,defense response to fungus	PF12799.7:Leucine Rich repeats (2 copies)
g10126	0	0	0	0.51	0.59	0.49	0.56	0	0	0	0	0	0	0	0	0	0	0	30	42	28	31	0	0	0	0	0	0	0	0	LG3	4820320	4825429	+	K19613 leucine-rich repeat protein SHOC2 | (RefSeq) receptor like protein 30-like (A)	--	PREDICTED: receptor-like protein 12 [Ipomoea nil]	RecName: Full=Receptor-like protein Cf-9 homolog {ECO:0000305}; Flags: Precursor;	SubName: Full=Uncharacterized protein {ECO:0000313|EMBL:EYU39802.1};	FOG: Leucine rich repeat	GO:0016021,integral component of membrane; GO:0005886,plasma membrane	PF13855.6:Leucine rich repeat
g10140	7.75	10.41	6.83	23.36	17.9	20.77	9.86	4.54	10.62	16.71	19.42	12.82	14.87	10.77	12.82	89	168	125	297	279	260	119	52	120	221	249	163	199	149	174	LG3	4914424	4916185	-	--	--	PREDICTED: uncharacterized protein LOC109173287 [Ipomoea nil]	--	SubName: Full=Uncharacterized protein {ECO:0000313|EMBL:CBI16312.3};	--	GO:0009536,plastid	--
g10151	4.32	5.04	1.39	3.1	13.79	5.93	5.77	5.61	5.91	10.98	12.91	9.14	3.62	5.8	4.71	220	361	113	175	953	329	309	285	296	644	734	515	215	356	286	LG3	4997777	5014086	+	--	--	PREDICTED: uncharacterized protein LOC109173036 [Ipomoea nil]	RecName: Full=tRNA ligase 1 {ECO:0000303|PubMed:15653639}; Short=AtRLG1 {ECO:0000303|PubMed:20844078}; Short=AtRNL {ECO:0000303|PubMed:16428247}; Short=AtRlg1p {ECO:0000303|PubMed:20844078}; EC=6.5.1.3 {ECO:0000269|PubMed:15653639, ECO:0000269|PubMed:23515942, ECO:0000269|PubMed:24554441}; AltName: Full=Protein AT.I.24-9 {ECO:0000303|Ref.4};	SubName: Full=Uncharacterized protein {ECO:0000313|EMBL:OIS96534.1};	--	GO:0005737,cytoplasm; GO:0005634,nucleus; GO:0005524,ATP binding; GO:0004519,endonuclease activity; GO:0016301,kinase activity; GO:0046872,metal ion binding; GO:0003729,mRNA binding; GO:0003972,RNA ligase (ATP) activity; GO:0009734,auxin-activated signaling pathway; GO:0010928,regulation of auxin mediated signaling pathway; GO:0042245,RNA repair; GO:0006412,translation; GO:0006388,tRNA splicing, …	PF08302.11:Fungal tRNA ligase phosphodiesterase domain
g10160	11.56	13.34	4.58	8.08	18.34	6.91	18	12.13	20.61	4.74	9.3	6.62	17.95	12.25	15.1	341	553	215	264	734	222	558	357	598	161	306	216	617	435	526	LG3	5085847	5088318	+	--	--	PREDICTED: protein indeterminate-domain 9-like [Ipomoea nil]	RecName: Full=Zinc finger protein JACKDAW; AltName: Full=ID1-like zinc finger protein 3 {ECO:0000303|Ref.2}; AltName: Full=Protein indeterminate-domain 10 {ECO:0000303|PubMed:16784536};	SubName: Full=zinc finger protein JACKDAW-like {ECO:0000313|RefSeq:XP_016496517.1};	FOG: Zn-finger	GO:0005634,nucleus; GO:0003677,DNA binding; GO:0003700,DNA-binding transcription factor activity; GO:0046872,metal ion binding; GO:0008356,asymmetric cell division; GO:0051302,regulation of cell division; GO:0045604,regulation of epidermal cell differentiation; GO:0010075,regulation of meristem growth; GO:0006355,regulation of transcription, DNA-templated; GO:0048364,root development; GO:0006351,…	PF00096.26:Zinc finger, C2H2 type
g10161	49.89	89.47	64.98	66.7	61.85	61.16	221.46	288.34	243.25	109.6	106.07	125.9	70.52	60.57	65.545	2218	5589	4602	3283	3731	2963	10346	12788	10637	5612	5263	6194	3654	3243	3449	LG3	5113457	5119928	+	K12309 beta-galactosidase [EC:3.2.1.23] | (RefSeq) beta-galactosidase 17 (A)	ko00052: Galactose metabolism; ko00511: Other glycan degradation; ko00531: Glycosaminoglycan degradation; ko00600: Sphingolipid metabolism; ko00604: Glycosphingolipid biosynthesis - ganglio series	PREDICTED: beta-galactosidase 8-like isoform X1 [Ipomoea nil]	RecName: Full=Beta-galactosidase 8; Short=Lactase 8; EC=3.2.1.23; AltName: Full=Protein AR782; Flags: Precursor;	RecName: Full=Beta-galactosidase {ECO:0000256|RuleBase:RU000675}; EC=3.2.1.23 {ECO:0000256|RuleBase:RU000675};	Beta-galactosidase	GO:0048046,apoplast; GO:0005618,cell wall; GO:0005773,vacuole; GO:0004565,beta-galactosidase activity; GO:0030246,carbohydrate binding; GO:0005975,carbohydrate metabolic process	PF01301.19:Glycosyl hydrolases family 35
g10162	0	0	0	0	1.91	0.25	1.49	0	0	3.8	3	0.93	0.74	0	0.37	0	0	0	0	48	5	29	0	0	81	62	19	16	0	8	LG3	5119942	5121812	-	--	--	PREDICTED: uncharacterized protein LOC109173130 [Ipomoea nil]	--	SubName: Full=Uncharacterized protein {ECO:0000313|EMBL:PIN14050.1};	--	--	PF06830.11:Root cap
g10163	24.72	22.67	23.48	48.38	55	56.55	24.15	40.28	35.05	42.22	33.69	35.44	60.36	54.92	57.64	641	826	970	1389	1935	1598	658	1042	894	1261	975	1017	1824	1715	1770	LG3	5133206	5135002	-	--	--	PREDICTED: uncharacterized protein LOC109174091 [Ipomoea nil]	--	SubName: Full=uncharacterized protein LOC107778849 {ECO:0000313|RefSeq:XP_016454657.1};	--	GO:0016021,integral component of membrane; GO:0008168,methyltransferase activity	PF08241.12:Methyltransferase domain
g10164	1.32	0	1.27	38.35	10.99	31.96	9.52	2.99	2.59	45.32	44.8	43.84	16.48	30.59	23.535	15	0	23	484	170	397	114	34	29	595	570	553	219	420	320	LG3	5138267	5139056	+	K13993 HSP20 family protein | (RefSeq) 17.8 kDa class I heat shock protein-like (A)	ko04141: Protein processing in endoplasmic reticulum	PREDICTED: 17.8 kDa class I heat shock protein-like isoform X2 [Ipomoea nil]	RecName: Full=17.5 kDa class I heat shock protein; AltName: Full=HSP 17.5-M;	SubName: Full=17.5 kDa class I heat shock protein {ECO:0000313|EMBL:KHN15482.1};	Molecular chaperone (small heat-shock protein Hsp26/Hsp42)	GO:0005737,cytoplasm	PF00011.21:Hsp20/alpha crystallin family
g10165	4.24	2.89	7.1	17.72	9.97	16.71	0.84	4.78	6.29	16.96	12.28	21.97	8.95	19.82	14.385	48	46	128	222	153	206	10	54	70	221	155	275	118	270	194	LG3	5143277	5144060	+	K13993 HSP20 family protein | (RefSeq) 17.8 kDa class I heat shock protein-like (A)	ko04141: Protein processing in endoplasmic reticulum	PREDICTED: 17.8 kDa class I heat shock protein-like isoform X2 [Ipomoea nil]	RecName: Full=17.5 kDa class I heat shock protein; AltName: Full=HSP 17.5-M;	SubName: Full=17.5 kDa class I heat shock protein {ECO:0000313|EMBL:KHN15482.1};	Molecular chaperone (small heat-shock protein Hsp26/Hsp42)	GO:0005737,cytoplasm	PF00011.21:Hsp20/alpha crystallin family
g10167	33.25	53.68	32.13	79	97.1	73.3	61.84	69.57	63.36	86.07	73.56	89.97	37.69	38.66	38.175	1000	2268	1539	2630	3962	2402	1954	2087	1874	2981	2469	2994	1321	1400	1361	LG3	5151937	5157024	+	--	--	PREDICTED: uncharacterized protein LOC109173166 isoform X1 [Ipomoea nil]	--	SubName: Full=Uncharacterized protein {ECO:0000313|EMBL:CDP07119.1};	Protein involved in mRNA turnover and stability	GO:0016021,integral component of membrane; GO:0008270,zinc ion binding	--
g10168	25.02	34.29	20.06	6.84	11.47	7.63	19.29	23.22	26.99	27.96	28.41	25.59	28.2	21.23	24.715	1101	2120	1406	333	685	366	892	1019	1168	1417	1395	1246	1446	1125	1286	LG3	5158487	5165462	+	K03526 (E)-4-hydroxy-3-methylbut-2-enyl-diphosphate synthase [EC:1.17.7.1 1.17.7.3] | (RefSeq) 4-hydroxy-3-methylbut-2-en-1-yl diphosphate synthase (ferredoxin), chloroplastic (A)	ko00900: Terpenoid backbone biosynthesis	PREDICTED: 4-hydroxy-3-methylbut-2-en-1-yl diphosphate synthase (ferredoxin), chloroplastic [Ipomoea nil]	RecName: Full=4-hydroxy-3-methylbut-2-en-1-yl diphosphate synthase (ferredoxin), chloroplastic; EC=1.17.7.1 {ECO:0000269|PubMed:15650872}; AltName: Full=1-hydroxy-2-methyl-2-(E)-butenyl 4-diphosphate synthase; AltName: Full=Protein CHLOROPLAST BIOGENESIS 4; AltName: Full=Protein CONSTITUTIVE SUBTILISIN 3; Flags: Precursor;	SubName: Full=(E)-4-hydroxy-3-methylbut-2-enyl-diphosphate synthase {ECO:0000313|EMBL:APY22346.1}; Flags: Fragment;	--	GO:0009507,chloroplast; GO:0009941,chloroplast envelope; GO:0009570,chloroplast stroma; GO:0051539,4 iron, 4 sulfur cluster binding; GO:0046429,4-hydroxy-3-methylbut-2-en-1-yl diphosphate synthase activity; GO:0005506,iron ion binding; GO:0019288,isopentenyl diphosphate biosynthetic process, methylerythritol 4-phosphate pathway; GO:0009617,response to bacterium; GO:0009862,systemic acquired resis…	PF04551.14:GcpE protein
g1017	0.38	2.51	2.15	0.13	0.38	0	2.5	2.4	3.25	2.81	1.73	0.64	0.89	0.9	0.895	8	75	73	3	11	0	56	51	68	69	41	15	22	23	23	LG1	5940577	5943108	+	K16302 metal transporter CNNM | (RefSeq) DUF21 domain-containing protein At2g14520-like (A)	--	PREDICTED: DUF21 domain-containing protein At2g14520-like isoform X1 [Ipomoea nil]	RecName: Full=DUF21 domain-containing protein At2g14520; AltName: Full=CBS domain-containing protein CBSDUF3;	SubName: Full=DUF21 domain-containing protein {ECO:0000313|EMBL:PHT56850.1};	Predicted membrane protein, contains two CBS domains	GO:0016021,integral component of membrane	PF01595.20:Cyclin M transmembrane N-terminal domain
g10171	0	8.06	0.12	0.71	4.32	1.25	0	0	0	3.22	0.87	0	6.53	5.19	5.86	0	58	1	4	30	7	0	0	0	19	5	0	39	32	36	LG3	5175057	5175411	+	--	--	--	--	--	--	--	--
g10177	1.94	1.28	0	0	0.18	0.45	0.91	0	0	0	0	1.27	0	0	0	55	51	0	0	7	14	27	0	0	0	0	40	0	0	0	LG3	5220918	5227962	-	K05387 glutamate receptor, ionotropic, plant | (RefSeq) glutamate receptor 1.2-like (A)	--	PREDICTED: glutamate receptor 1.2-like [Ipomoea nil]	RecName: Full=Glutamate receptor 1.2; AltName: Full=Ligand-gated ion channel 1.2; Flags: Precursor;	SubName: Full=Glutamate-gated kainate-type ion channel receptor subunit GluR5 {ECO:0000313|EMBL:PIN16362.1};	Glutamate-gated kainate-type ion channel receptor subunit GluR5 and related subunits	GO:0016021,integral component of membrane; GO:0005622,intracellular; GO:0005886,plasma membrane; GO:0005262,calcium channel activity; GO:0008066,glutamate receptor activity; GO:0004970,ionotropic glutamate receptor activity; GO:0006816,calcium ion transport; GO:0019722,calcium-mediated signaling; GO:0071230,cellular response to amino acid stimulus	PF00497.20:Bacterial extracellular solute-binding proteins, family 3
g10186	14.64	19.33	10.85	8.45	10.31	7.02	12.46	22.06	28.65	15.54	18.15	13.63	8.69	10.87	9.78	360	668	425	230	344	188	322	541	693	440	498	371	249	322	286	LG3	5287837	5291947	+	--	--	PREDICTED: double-stranded RNA-binding protein 2-like [Ipomoea nil]	RecName: Full=Double-stranded RNA-binding protein 2; AltName: Full=dsRNA-binding protein 2; Short=AtDRB2;	SubName: Full=Double-stranded rna-binding protein 2 {ECO:0000313|EMBL:OIS96589.1};	--	GO:0005737,cytoplasm; GO:0003725,double-stranded RNA binding; GO:0035196,production of miRNAs involved in gene silencing by miRNA; GO:0070919,production of siRNA involved in chromatin silencing by small RNA	PF00035.26:Double-stranded RNA binding motif
g1019	358.36	59.77	274.96	33.55	36.19	38.99	27.5	33.78	19.43	56.71	95.86	50.92	40.96	51.6	46.28	3956	927	4835	410	542	469	319	372	211	721	1181	622	527	686	607	LG1	5973177	5974129	+	--	--	PREDICTED: phytosulfokines-like [Ipomoea nil]	RecName: Full=Phytosulfokines; Contains: RecName: Full=Phytosulfokine-alpha; Short=PSK-alpha; Short=Phytosulfokine-a; Contains: RecName: Full=Phytosulfokine-beta; Short=PSK-beta; Short=Phytosulfokine-b; Flags: Precursor;	SubName: Full=Uncharacterized protein {ECO:0000313|EMBL:PHT56858.1};	--	GO:0005576,extracellular region; GO:0008083,growth factor activity; GO:0030154,cell differentiation; GO:0008283,cell proliferation; GO:0007275,multicellular organism development	PF06404.12:Phytosulfokine precursor protein (PSK)
g10191	90.82	110.73	163.76	156.73	94.77	135.03	60.43	60.8	47.51	153.87	184.1	163.18	125.08	136.72	130.9	861	1475	2473	1645	1219	1395	602	575	443	1680	1948	1712	1382	1561	1472	LG3	5337735	5339605	+	--	--	serine/threonine-protein phosphatase 6 regulatory subunit 3-like [Brassica napus]	RecName: Full=Ubiquitin-like protein 5;	SubName: Full=Uncharacterized protein {ECO:0000313|EMBL:KDO73307.1}; Flags: Fragment;	SAP family cell cycle dependent phosphatase-associated protein	GO:0005737,cytoplasm; GO:0005634,nucleus; GO:0031386,protein tag; GO:0006464,cellular protein modification process; GO:0000398,mRNA splicing, via spliceosome	PF00240.23:Ubiquitin family
g10196	97.51	133.71	121.27	66.98	22.2	55.88	72.39	65.53	63.91	89.41	88.49	75.59	115.09	110.96	113.025	1787	3443	3540	1359	552	1116	1394	1198	1152	1887	1810	1533	2458	2449	2454	LG3	5372425	5373694	+	--	--	ubiquitin-like protein [Glycine max]	RecName: Full=Ubiquitin-like protein 5;	SubName: Full=Uncharacterized protein {ECO:0000313|EnsemblPlants:GLYMA13G29291.1};	Ubiquitin-like protein	GO:0005737,cytoplasm; GO:0005634,nucleus; GO:0031386,protein tag; GO:0006464,cellular protein modification process; GO:0000398,mRNA splicing, via spliceosome	PF00240.23:Ubiquitin family
g10197	12.03	21.5	11.75	11.91	9.57	6.6	22.19	8.31	9.09	7.37	12.62	4.65	3.68	8.95	6.315	241	605	375	264	260	144	467	166	179	170	282	103	86	216	151	LG3	5374083	5377830	-	--	--	PREDICTED: GATA transcription factor 11-like [Ipomoea nil]	RecName: Full=GATA transcription factor 11;	SubName: Full=Gata transcription factor 11 {ECO:0000313|EMBL:OIT19906.1};	GATA-4/5/6 transcription factors	GO:0005634,nucleus; GO:0005667,transcription factor complex; GO:0003682,chromatin binding; GO:0003700,DNA-binding transcription factor activity; GO:0000977,RNA polymerase II regulatory region sequence-specific DNA binding; GO:0001085,RNA polymerase II transcription factor binding; GO:0001228,DNA-binding transcription activator activity, RNA polymerase II-specific; GO:0008270,zinc ion binding; GO:…	PF00320.27:GATA zinc finger
g10200	7.94	10.13	14.49	8	7.1	8.96	17.84	18.57	17.34	4.67	7.93	4.27	7.82	3.13	5.475	183	328	532	204	222	225	432	427	393	124	204	109	210	87	149	LG3	5400678	5408670	-	--	--	PREDICTED: uncharacterized protein LOC109173468 isoform X1 [Ipomoea nil]	--	SubName: Full=Uncharacterized protein {ECO:0000313|EnsemblPlants:Solyc11g069550.1.1};	--	GO:0016021,integral component of membrane	PF05212.12:Protein of unknown function (DUF707)
g10203	0.83	0.64	0.45	0	0.2	0	0	0.75	0	0	0	0	0.61	0	0.305	28	30	24	0	9	0	0	25	0	0	0	0	24	0	12	LG3	5428615	5434732	+	K15255 ATP-dependent DNA helicase PIF1 [EC:3.6.4.12] | (RefSeq) ATP-dependent DNA helicase pif1-like (A)	--	PREDICTED: uncharacterized protein LOC109192887 [Ipomoea nil]	--	RecName: Full=ATP-dependent DNA helicase {ECO:0000256|RuleBase:RU363044}; EC=3.6.4.12 {ECO:0000256|RuleBase:RU363044};	DNA helicase PIF1/RRM3	GO:0005524,ATP binding; GO:0003678,DNA helicase activity; GO:0006310,DNA recombination; GO:0006281,DNA repair; GO:0000723,telomere maintenance	PF05970.14:PIF1-like helicase
g10206	5.28	3.93	2.07	5.14	8.33	7.07	2.42	3.39	2.13	5.36	5.13	2.75	3.31	3.36	3.335	189	198	118	204	405	276	91	121	75	221	205	109	138	145	142	LG3	5470984	5478810	-	K13436 pto-interacting protein 1 [EC:2.7.11.1] | (RefSeq) PTI1-like tyrosine-protein kinase 3 (A)	ko04626: Plant-pathogen interaction	PREDICTED: receptor-like serine/threonine-protein kinase NCRK [Ipomoea nil]	RecName: Full=Receptor-like serine/threonine-protein kinase NCRK; EC=2.7.11.1; Flags: Precursor;	SubName: Full=receptor-like serine/threonine-protein kinase NCRK isoform X2 {ECO:0000313|RefSeq:XP_016483620.1, ECO:0000313|RefSeq:XP_016483621.1, ECO:0000313|RefSeq:XP_016483622.1};	Serine/threonine protein kinase	GO:0012505,endomembrane system; GO:0005768,endosome; GO:0010008,endosome membrane; GO:0016021,integral component of membrane; GO:0031902,late endosome membrane; GO:0005886,plasma membrane; GO:0005524,ATP binding; GO:0051020,GTPase binding; GO:0004675,transmembrane receptor protein serine/threonine kinase activity; GO:0007166,cell surface receptor signaling pathway; GO:0006468,protein phosphorylat…	PF00069.25:Protein kinase domain
g10207	11.18	5.51	5.24	5.47	14.61	6.49	10.14	8.32	8.48	8.96	12.67	13.25	3.95	4.78	4.365	299	207	223	162	530	189	285	222	223	276	378	392	123	154	139	LG3	5484090	5486220	-	K11643 chromodomain-helicase-DNA-binding protein 4 [EC:3.6.4.12] | (RefSeq) uncharacterized LOC109173545 (A)	--	PREDICTED: uncharacterized protein LOC109173545 isoform X2 [Ipomoea nil]	--	--	--	--	--
g10209	1.19	0.44	1.09	1.46	6.95	1.01	0.57	2.05	1.65	0.91	0.83	0.1	0.5	0.83	0.665	97	51	142	132	771	90	49	167	133	86	76	9	48	82	65	LG3	5489666	5506060	-	K11643 chromodomain-helicase-DNA-binding protein 4 [EC:3.6.4.12] | (RefSeq) uncharacterized LOC109173545 (A)	--	PREDICTED: uncharacterized protein LOC109173545 isoform X1 [Ipomoea nil]	RecName: Full=Helicase protein MOM1; EC=3.6.4.-; AltName: Full=Protein MAINTENANCE OF METHYLATION; AltName: Full=Protein MORPHEUS MOLECULE 1;	SubName: Full=helicase protein MOM1-like isoform X2 {ECO:0000313|RefSeq:XP_016575389.1};	Predicted helicase	GO:0005634,nucleus; GO:0051537,2 iron, 2 sulfur cluster binding; GO:0005524,ATP binding; GO:0004386,helicase activity; GO:0046872,metal ion binding; GO:0042803,protein homodimerization activity; GO:0006342,chromatin silencing; GO:0031047,gene silencing by RNA; GO:0006344,maintenance of chromatin silencing; GO:0006351,transcription, DNA-templated	PF00385.24:Chromo (CHRromatin Organisation MOdifier) domain
g10212	0.98	0.48	0	0.84	0.8	0.47	3.48	3.62	1.73	1.97	0.74	0	0	0.3	0.15	19	13	0	18	21	10	71	70	33	44	16	0	0	7	4	LG3	5544529	5546598	-	--	--	PREDICTED: uncharacterized protein LOC109168952 isoform X1 [Ipomoea nil]	--	SubName: Full=Uncharacterized protein {ECO:0000313|EnsemblPlants:PGSC0003DMT400033852};	Nuclear localization sequence binding protein	--	--
g1022	1.57	2.17	4.07	0.61	2.64	2.09	7.75	2.69	3.18	1.48	0.8	1.82	1.69	0.04	0.865	35	68	145	15	80	51	182	60	70	38	20	45	44	1	23	LG1	5982507	5985796	+	--	--	PREDICTED: ACT domain-containing protein ACR1-like isoform X1 [Ipomoea nil]	RecName: Full=ACT domain-containing protein ACR5 {ECO:0000305}; AltName: Full=Protein ACT DOMAIN REPEATS 5 {ECO:0000303|PubMed:12481063};	SubName: Full=ACT domain-containing protein ACR1-like isoform X1 {ECO:0000313|RefSeq:XP_016463718.1};	--	GO:0016597,amino acid binding	PF01842.25:ACT domain
g10220	3.25	4.14	3.94	1.37	0.66	1.13	1.49	1.4	1.71	4.86	7.67	3.95	2.55	2.56	2.555	58	104	112	27	16	22	28	25	30	100	153	78	53	55	54	LG3	5600093	5601477	+	--	--	PREDICTED: uncharacterized protein LOC109168955 [Ipomoea nil]	--	SubName: Full=uncharacterized protein LOC104213897 {ECO:0000313|RefSeq:XP_009761756.1};	--	--	--
g10227	0	0	0	0	0.05	0	2.56	1.83	5.03	5.88	7.23	10.95	3.56	1.8	2.68	0	0	0	0	2	0	87	59	160	219	261	392	134	70	102	LG3	5648539	5654698	-	K10357 myosin V | (RefSeq) myosin-17-like (A)	--	PREDICTED: myosin-17-like isoform X4 [Ipomoea nil]	RecName: Full=Myosin-17; AltName: Full=Myosin XI K; Short=AtXIK;	SubName: Full=Myosin-5 {ECO:0000313|EMBL:PHU11751.1};	Myosin class V heavy chain	GO:0016459,myosin complex; GO:0009506,plasmodesma; GO:0035619,root hair tip; GO:0030133,transport vesicle; GO:0003779,actin binding; GO:0005524,ATP binding; GO:0005516,calmodulin binding; GO:0003774,motor activity; GO:0030048,actin filament-based movement; GO:0051645,Golgi localization; GO:0048467,gynoecium development; GO:0090436,leaf pavement cell development; GO:0051646,mitochondrion localizat…	PF01843.19:DIL domain
g10233	0	0	0	0.7	0.48	0.11	4.3	0.95	2.34	1.35	1.47	0.63	0.67	0.44	0.555	0	0	0	19	16	3	110	23	56	38	40	17	19	13	16	LG3	5697280	5701545	+	K01551 arsenite/tail-anchored protein-transporting ATPase [EC:3.6.3.16 3.6.3.-] | (RefSeq) ATPase ASNA1 homolog (A)	--	PREDICTED: ATPase ASNA1 homolog [Ipomoea nil]	RecName: Full=ATPase ARSA1 {ECO:0000305}; Short=Cr-ArsA1 {ECO:0000303|PubMed:28382961}; EC=3.6.-.- {ECO:0000305}; AltName: Full=Arsenical pump-driving ATPase homolog 1 {ECO:0000305}; AltName: Full=Arsenite-stimulated ATPase homolog 1 {ECO:0000305}; AltName: Full=Protein ANTENNA SIZE MUTANT 1 {ECO:0000303|PubMed:23167510};	SubName: Full=Putative arsenite-translocating ATPase {ECO:0000313|EMBL:PIN18131.1}; EC=3.6.3.16 {ECO:0000313|EMBL:PIN18131.1};	Putative arsenite-translocating ATPase	GO:0005829,cytosol; GO:0005524,ATP binding; GO:0016887,ATPase activity	PF02374.15:Anion-transporting ATPase
g10238	14.38	20.95	10.9	40.81	55.39	45.14	18.2	45.03	26.42	24.02	25.3	19.46	36.7	36.28	36.49	455	931	549	1429	2377	1556	605	1421	822	875	893	681	1353	1382	1368	LG3	5723720	5727160	+	K04077 chaperonin GroEL | (RefSeq) ruBisCO large subunit-binding protein subunit beta, chloroplastic (A)	ko03018: RNA degradation	PREDICTED: ruBisCO large subunit-binding protein subunit alpha [Ipomoea nil]	RecName: Full=RuBisCO large subunit-binding protein subunit alpha, chloroplastic; AltName: Full=60 kDa chaperonin subunit alpha; AltName: Full=CPN-60 alpha; Flags: Precursor;	SubName: Full=ruBisCO large subunit-binding protein subunit alpha-like {ECO:0000313|RefSeq:XP_016516134.1};	Mitochondrial chaperonin, Cpn60/Hsp60p	GO:0009507,chloroplast; GO:0005524,ATP binding; GO:0042026,protein refolding	PF00118.24:TCP-1/cpn60 chaperonin family
g10243	1.34	5.37	2.95	4.52	6.64	4.15	10.99	7.91	9.73	1.16	5.17	0.9	3.11	4.15	3.63	31	175	109	116	209	105	268	183	222	31	134	23	84	116	100	LG3	5756440	5759710	+	K00130 betaine-aldehyde dehydrogenase [EC:1.2.1.8] | (RefSeq) betaine aldehyde dehydrogenase, chloroplastic-like (A)	ko00260: Glycine, serine and threonine metabolism	PREDICTED: betaine aldehyde dehydrogenase, chloroplastic-like [Ipomoea nil]	RecName: Full=Betaine aldehyde dehydrogenase, chloroplastic; Short=BADH; EC=1.2.1.8; Flags: Precursor;	SubName: Full=Betaine-aldehyde dehydrogenase family protein {ECO:0000313|EMBL:EEE96850.1};	Aldehyde dehydrogenase	GO:0009507,chloroplast; GO:0008802,betaine-aldehyde dehydrogenase activity; GO:0019285,glycine betaine biosynthetic process from choline	PF00171.22:Aldehyde dehydrogenase family
g10251	38.54	43.9	40.89	111.28	75.18	127.3	74.5	72.94	69.23	98.13	105.47	92.63	61.73	52.34	57.035	991	1586	1675	3168	2623	3567	2013	1871	1751	2906	3027	2636	1850	1621	1736	LG3	5845829	5849795	-	K16298 serine carboxypeptidase-like clade IV [EC:3.4.16.-] | (RefSeq) serine carboxypeptidase-like (A)	--	PREDICTED: serine carboxypeptidase-like [Ipomoea nil]	RecName: Full=Serine carboxypeptidase-like 48; EC=3.4.16.-; Flags: Precursor;	RecName: Full=Carboxypeptidase {ECO:0000256|RuleBase:RU361156}; EC=3.4.16.- {ECO:0000256|RuleBase:RU361156};	Serine carboxypeptidases (lysosomal cathepsin A)	GO:0005576,extracellular region; GO:0005773,vacuole; GO:0004185,serine-type carboxypeptidase activity; GO:0051603,proteolysis involved in cellular protein catabolic process	PF00450.22:Serine carboxypeptidase
g10254	0.29	0.53	0	0.39	0.61	0.47	1.6	4.17	0.64	2.38	0.84	0.64	2.86	2.32	2.59	10	26	0	15	29	18	59	146	22	96	33	25	117	98	108	LG3	5862944	5866379	-	--	--	PREDICTED: CO(2)-response secreted protease-like [Ipomoea nil]	RecName: Full=CO(2)-response secreted protease {ECO:0000303|PubMed:25043023}; AltName: Full=Subtilisin-like serine protease {ECO:0000303|PubMed:25043023}; Short=AtSBT5.2 {ECO:0000303|PubMed:25043023}; AltName: Full=Tripeptidyl-peptidase II {ECO:0000255|PROSITE-ProRule:PRU10081}; EC=3.4.14.10 {ECO:0000255|PROSITE-ProRule:PRU10081}; Flags: Precursor;	SubName: Full=CO(2)-response secreted protease-like {ECO:0000313|RefSeq:XP_016497908.1};	--	GO:0048046,apoplast; GO:0005618,cell wall; GO:0004252,serine-type endopeptidase activity; GO:0008236,serine-type peptidase activity; GO:1900425,negative regulation of defense response to bacterium; GO:2000122,negative regulation of stomatal complex development; GO:0006508,proteolysis; GO:2000038,regulation of stomatal complex development; GO:0010037,response to carbon dioxide	PF00082.22:Subtilase family
g10262	0.86	0.15	0	0	1.43	0.99	0	0	0.11	0	0.58	0	1.84	2.05	1.945	8	2	0	0	18	10	0	0	1	0	6	0	20	23	22	LG3	5920774	5921715	+	--	--	--	--	--	--	--	--
g10263	7.84	5.94	3.41	2.74	0.93	1.28	0	0.63	5.79	9.66	13.71	6.51	0.11	0.63	0.37	62	66	43	24	10	11	0	5	45	88	121	57	1	6	4	LG3	5936604	5937473	+	--	--	PREDICTED: uncharacterized protein LOC109169238 [Ipomoea nil]	--	SubName: Full=hydroxyacyl-thioester dehydratase type 2, mitochondrial-like {ECO:0000313|RefSeq:XP_009795513.1};	Peroxisomal multifunctional beta-oxidation protein and related enzymes	--	PF01575.19:MaoC like domain
g10264	25.3	49.41	46.32	76.89	44.09	61.08	21.94	18.99	33.33	154	154.78	148	79.25	90.87	85.06	203	557	592	683	480	534	185	152	263	1423	1386	1314	741	878	810	LG3	5937614	5938169	-	K04077 chaperonin GroEL | (RefSeq) ruBisCO large subunit-binding protein subunit beta, chloroplastic-like (A)	ko03018: RNA degradation	chaperonin 60 alpha subunit, partial [Arachis diogoi]	RecName: Full=RuBisCO large subunit-binding protein subunit alpha, chloroplastic; AltName: Full=60 kDa chaperonin subunit alpha; AltName: Full=CPN-60 alpha; Flags: Precursor;	SubName: Full=Chaperonin 60 alpha subunit {ECO:0000313|EMBL:ACA23472.1}; Flags: Fragment;	Mitochondrial chaperonin, Cpn60/Hsp60p	GO:0009507,chloroplast; GO:0005524,ATP binding; GO:0042026,protein refolding	PF00118.24:TCP-1/cpn60 chaperonin family
g10265	8.9	14.7	13.55	22.74	18.44	21.53	10.39	8.66	12.96	37.18	30.2	40.27	17.42	13.94	15.68	405	940	982	1146	1139	1068	497	393	580	1949	1534	2028	924	764	844	LG3	5938304	5944456	+	K04077 chaperonin GroEL | (RefSeq) ruBisCO large subunit-binding protein subunit beta, chloroplastic (A)	ko03018: RNA degradation	PREDICTED: ruBisCO large subunit-binding protein subunit alpha [Ipomoea nil]	RecName: Full=RuBisCO large subunit-binding protein subunit alpha, chloroplastic; AltName: Full=60 kDa chaperonin subunit alpha; AltName: Full=CPN-60 alpha; Flags: Precursor;	SubName: Full=ruBisCO large subunit-binding protein subunit alpha {ECO:0000313|RefSeq:XP_016509320.1};	Mitochondrial chaperonin, Cpn60/Hsp60p	GO:0009507,chloroplast; GO:0005524,ATP binding; GO:0042026,protein refolding	PF00118.24:TCP-1/cpn60 chaperonin family
g10267	0.55	0	0	7.94	21.16	9.98	0	0	0	3.36	4.82	5.23	0	0.14	0.07	19	0	0	304	993	376	0	0	0	134	186	200	0	6	3	LG3	5953851	5956339	-	--	--	PREDICTED: subtilisin-like protease SBT1.4 [Ipomoea nil]	RecName: Full=Subtilisin-like protease SBT1.4 {ECO:0000303|PubMed:16193095}; EC=3.4.21.- {ECO:0000255|PROSITE-ProRule:PRU10082}; AltName: Full=Subtilase subfamily 1 member 4 {ECO:0000303|PubMed:16193095}; Short=AtSBT1.4 {ECO:0000303|PubMed:16193095}; Flags: Precursor;	SubName: Full=Peptidase S8/S53 domain {ECO:0000313|EMBL:OVA08339.1};	--	GO:0048046,apoplast; GO:0009505,plant-type cell wall; GO:0005774,vacuolar membrane; GO:0005773,vacuole; GO:0004252,serine-type endopeptidase activity; GO:0010150,leaf senescence; GO:0010223,secondary shoot formation	PF00082.22:Subtilase family
g10269	0	0	0	0.37	0.15	0.26	2.81	1.6	6.42	0.78	0.11	0.07	3.73	2.65	3.19	0	0	0	10	5	7	72	39	154	22	3	2	106	78	92	LG3	5984814	5990987	+	K14310 nuclear pore complex protein Nup205 | (RefSeq) nuclear pore complex protein NUP205 (A)	ko03013: RNA transport	PREDICTED: nuclear pore complex protein NUP205 isoform X4 [Ipomoea nil]	--	--	--	--	--
g10275	10.83	8.81	11.54	24.87	26.27	20.76	10.01	13.69	9.53	21.12	13.34	19.33	12.81	9.42	11.115	483	552	820	1228	1590	1009	469	609	418	1085	664	954	666	506	586	LG3	6040916	6048263	+	K01904 4-coumarate--CoA ligase [EC:6.2.1.12] | (RefSeq) 4-coumarate--CoA ligase-like 7 (A)	ko00130: Ubiquinone and other terpenoid-quinone biosynthesis; ko00940: Phenylpropanoid biosynthesis	PREDICTED: 4-coumarate--CoA ligase-like 7 [Ipomoea nil]	RecName: Full=4-coumarate--CoA ligase-like 7; EC=6.2.1.-; AltName: Full=4-coumarate--CoA ligase isoform 6; Short=At4CL6;	SubName: Full=4-coumarate--CoA ligase-like 7 {ECO:0000313|RefSeq:XP_016475356.1};	Acyl-CoA synthetase	GO:0005777,peroxisome; GO:0005524,ATP binding; GO:0004321,fatty-acyl-CoA synthase activity; GO:0016874,ligase activity; GO:0009695,jasmonic acid biosynthetic process; GO:0031408,oxylipin biosynthetic process	PF00501.28:AMP-binding enzyme
g10279	1.16	0.18	1.2	0.94	0.63	0	4.13	1.76	3.74	5.24	5.09	0.97	3.37	5.06	4.215	37	8	61	33	27	0	138	56	117	192	181	34	125	194	160	LG3	6064926	6077823	+	K01904 4-coumarate--CoA ligase [EC:6.2.1.12] | (RefSeq) 4-coumarate--CoA ligase-like 7 (A)	ko00130: Ubiquinone and other terpenoid-quinone biosynthesis; ko00940: Phenylpropanoid biosynthesis	PREDICTED: 4-coumarate--CoA ligase-like 7 [Ipomoea nil]	RecName: Full=4-coumarate--CoA ligase-like 7; EC=6.2.1.-; AltName: Full=4-coumarate--CoA ligase isoform 6; Short=At4CL6;	SubName: Full=4-coumarate--CoA ligase-like 7 {ECO:0000313|RefSeq:XP_016475356.1};	Acyl-CoA synthetase	GO:0005777,peroxisome; GO:0005524,ATP binding; GO:0004321,fatty-acyl-CoA synthase activity; GO:0016874,ligase activity; GO:0009695,jasmonic acid biosynthetic process; GO:0031408,oxylipin biosynthetic process	PF00501.28:AMP-binding enzyme
g10283	6.18	9.75	8.36	3.89	8.16	5.14	6.55	8.19	1.31	1.73	2.31	0	8.01	11.27	9.64	96	213	207	67	172	87	107	127	20	31	40	0	145	211	178	LG3	6097066	6099545	+	--	--	PREDICTED: heavy metal-associated isoprenylated plant protein 3-like [Ipomoea nil]	RecName: Full=Heavy metal-associated isoprenylated plant protein 3 {ECO:0000303|PubMed:21072340, ECO:0000303|PubMed:23368984}; Short=AtHIP03 {ECO:0000303|PubMed:21072340, ECO:0000303|PubMed:23368984}; Short=AtHIPP3 {ECO:0000303|PubMed:21072340, ECO:0000303|PubMed:23368984}; Flags: Precursor;	SubName: Full=heavy metal-associated isoprenylated plant protein 3-like {ECO:0000313|RefSeq:XP_016474499.1};	Copper chaperone	GO:0005737,cytoplasm; GO:0005730,nucleolus; GO:0005634,nucleus; GO:0008270,zinc ion binding; GO:0030001,metal ion transport; GO:0009910,negative regulation of flower development	PF00403.26:Heavy-metal-associated domain
g1029	66.06	12.75	45.43	23.13	17.73	18.54	24.41	23.33	27.04	12	11.37	12.88	10.63	10.65	10.64	1530	415	1676	593	557	468	594	539	616	320	294	330	287	297	292	LG1	6047867	6049471	+	K08238 xyloglucan 6-xylosyltransferase [EC:2.4.2.39] | (RefSeq) probable xyloglucan 6-xylosyltransferase 5 (A)	--	PREDICTED: glycosyltransferase 6-like [Ipomoea nil]	RecName: Full=Glycosyltransferase 6; Short=AtGT6; EC=2.4.-.-;	SubName: Full=Putative glycosyltransferase 7 {ECO:0000313|EMBL:OIS96077.1};	Subunit of Golgi mannosyltransferase complex	GO:0005768,endosome; GO:0005794,Golgi apparatus; GO:0000139,Golgi membrane; GO:0016021,integral component of membrane; GO:0005802,trans-Golgi network; GO:0008378,galactosyltransferase activity; GO:0010392,galactoglucomannan metabolic process; GO:0051070,galactomannan biosynthetic process; GO:0010192,mucilage biosynthetic process	PF05637.12:galactosyl transferase GMA12/MNN10 family
g103	5.99	10.46	4.15	6.99	3.36	4.01	4.56	7.13	7.75	12.66	11.82	11.18	0	0.51	0.255	155	380	171	200	118	113	124	184	197	377	341	320	0	16	8	LG1	622274	624928	+	--	--	PREDICTED: NAC domain-containing protein 37-like [Ipomoea nil]	RecName: Full=NAC domain-containing protein 79 {ECO:0000303|PubMed:15029955}; Short=ANAC79 {ECO:0000303|PubMed:15029955}; Short=ANAC80 {ECO:0000303|PubMed:15029955}; Short=AtNAC79 {ECO:0000303|PubMed:15029955}; Short=AtNAC80 {ECO:0000303|PubMed:15029955};	SubName: Full=NAC transcription factors 62 {ECO:0000313|EMBL:ALC79039.1};	--	GO:0005634,nucleus; GO:0003677,DNA binding; GO:0003700,DNA-binding transcription factor activity; GO:0006351,transcription, DNA-templated	PF02365.15:No apical meristem (NAM) protein
g1030	0	0.47	0	0	0.55	0.98	4.55	0	1.68	1.65	0.89	1.94	7.08	12.33	9.705	0	8	0	0	9	13	58	0	20	23	12	26	100	180	140	LG1	6055847	6058874	+	--	--	PREDICTED: uncharacterized protein LOC109188794 [Ipomoea nil]	--	SubName: Full=Uncharacterized protein {ECO:0000313|EnsemblPlants:Solyc02g092240.2.1};	--	--	PF14009.6:Domain of unknown function (DUF4228)
g10307	11.61	7.43	5.97	1.95	0.96	0.11	10.05	6.01	12.94	7.45	5.92	6.59	7	1.74	4.37	188	169	154	35	21	2	171	97	206	139	107	118	132	34	83	LG3	6214786	6217474	+	--	--	PREDICTED: uncharacterized protein LOC109176783 [Ipomoea nil]	--	SubName: Full=uncharacterized protein LOC107795358 {ECO:0000313|RefSeq:XP_016473463.1, ECO:0000313|RefSeq:XP_016473464.1};	Ubiquitin C-terminal hydrolase	GO:0005840,ribosome; GO:0003735,structural constituent of ribosome; GO:0006412,translation	PF00861.22:Ribosomal L18 of archaea, bacteria, mitoch. and chloroplast
g10309	5.31	11.8	9.44	12.54	15.04	7.46	6.76	13.73	10.21	0.06	2.24	2.2	7.3	12.43	9.865	83	259	235	217	319	127	111	214	157	1	39	38	133	234	184	LG3	6231114	6233563	-	--	--	PREDICTED: heavy metal-associated isoprenylated plant protein 3-like [Ipomoea nil]	RecName: Full=Heavy metal-associated isoprenylated plant protein 3 {ECO:0000303|PubMed:21072340, ECO:0000303|PubMed:23368984}; Short=AtHIP03 {ECO:0000303|PubMed:21072340, ECO:0000303|PubMed:23368984}; Short=AtHIPP3 {ECO:0000303|PubMed:21072340, ECO:0000303|PubMed:23368984}; Flags: Precursor;	SubName: Full=Copper chaperone {ECO:0000313|EMBL:PIN09596.1};	Copper chaperone	GO:0005737,cytoplasm; GO:0005730,nucleolus; GO:0005634,nucleus; GO:0008270,zinc ion binding; GO:0030001,metal ion transport; GO:0009910,negative regulation of flower development	PF00403.26:Heavy-metal-associated domain
g10313	0	0	0	1.24	1.94	3.39	0	0	0	0	0	0	0	0	0	0	0	0	13	25	35	0	0	0	0	0	0	0	0	0	LG3	6248158	6251044	+	K08244 alpha-glucan, water dikinase [EC:2.7.9.4] | (RefSeq) alpha-glucan water dikinase, chloroplastic-like (A)	--	PREDICTED: alpha-glucan water dikinase 1, chloroplastic-like isoform X3 [Lupinus angustifolius]	RecName: Full=Alpha-glucan water dikinase 1, chloroplastic; EC=2.7.9.4; AltName: Full=Protein starch excess 1; AltName: Full=Protein starch-related R1; Flags: Precursor;	SubName: Full=Uncharacterized protein {ECO:0000313|EMBL:OIV93721.1};	--	GO:0009507,chloroplast; GO:0009941,chloroplast envelope; GO:0009570,chloroplast stroma; GO:0005739,mitochondrion; GO:0050521,alpha-glucan, water dikinase activity; GO:0005524,ATP binding; GO:0046872,metal ion binding; GO:0009631,cold acclimation; GO:0009610,response to symbiotic fungus; GO:0005983,starch catabolic process	--
g10319	2.57	1.41	0.54	0.2	0.97	0.29	3.04	4.05	3.9	2.64	6.12	7.77	4.61	4.06	4.335	139	107	47	12	71	17	173	219	208	165	370	466	291	265	278	LG3	6300476	6310133	-	K01904 4-coumarate--CoA ligase [EC:6.2.1.12] | (RefSeq) 4-coumarate--CoA ligase-like 7 (A)	ko00130: Ubiquinone and other terpenoid-quinone biosynthesis; ko00940: Phenylpropanoid biosynthesis	PREDICTED: 4-coumarate--CoA ligase-like 7 [Ipomoea nil]	RecName: Full=4-coumarate--CoA ligase-like 7; EC=6.2.1.-; AltName: Full=4-coumarate--CoA ligase isoform 6; Short=At4CL6;	SubName: Full=4-coumarate--CoA ligase-like 7 {ECO:0000313|RefSeq:XP_016475356.1};	Acyl-CoA synthetase	GO:0005777,peroxisome; GO:0005524,ATP binding; GO:0004321,fatty-acyl-CoA synthase activity; GO:0016874,ligase activity; GO:0009695,jasmonic acid biosynthetic process; GO:0031408,oxylipin biosynthetic process	PF00501.28:AMP-binding enzyme
g1032	7.34	4.65	4.37	7.05	7.35	4.87	4.49	7.22	1.45	5.36	5.85	5.35	3.5	2.56	3.03	252	224	239	268	342	182	162	247	49	212	224	203	140	106	123	LG1	6064227	6069764	+	K14682 amino-acid N-acetyltransferase [EC:2.3.1.1] | (RefSeq) probable amino-acid acetyltransferase NAGS1, chloroplastic (A)	ko00220: Arginine biosynthesis; ko01210: 2-Oxocarboxylic acid metabolism; ko01230: Biosynthesis of amino acids	PREDICTED: probable amino-acid acetyltransferase NAGS2, chloroplastic isoform X1 [Ipomoea nil]	RecName: Full=Probable amino-acid acetyltransferase NAGS2, chloroplastic; EC=2.3.1.1; AltName: Full=N-acetylglutamate synthase 2; Flags: Precursor;	SubName: Full=probable amino-acid acetyltransferase NAGS1, chloroplastic isoform X2 {ECO:0000313|RefSeq:XP_009801122.1};	Acetylglutamate kinase/acetylglutamate synthase	GO:0009507,chloroplast; GO:0004042,acetyl-CoA:L-glutamate N-acetyltransferase activity; GO:0103045,methione N-acyltransferase activity; GO:0006526,arginine biosynthetic process	PF00583.25:Acetyltransferase (GNAT) family
g10320	0	0.47	0.03	2.48	2.43	1.36	0.05	3.47	0.06	0	0.05	1.29	3.86	2.69	3.275	0	12	1	50	60	27	1	63	1	0	1	26	82	59	71	LG3	6319408	6321838	+	--	--	PREDICTED: heavy metal-associated isoprenylated plant protein 3-like [Ipomoea nil]	RecName: Full=Heavy metal-associated isoprenylated plant protein 3 {ECO:0000303|PubMed:21072340, ECO:0000303|PubMed:23368984}; Short=AtHIP03 {ECO:0000303|PubMed:21072340, ECO:0000303|PubMed:23368984}; Short=AtHIPP3 {ECO:0000303|PubMed:21072340, ECO:0000303|PubMed:23368984}; Flags: Precursor;	SubName: Full=Copper chaperone {ECO:0000313|EMBL:PIN09596.1};	Copper chaperone	GO:0005737,cytoplasm; GO:0005730,nucleolus; GO:0005634,nucleus; GO:0008270,zinc ion binding; GO:0030001,metal ion transport; GO:0009910,negative regulation of flower development	--
g10321	2.76	4.85	6.05	9.32	7.5	7.61	0.71	3.58	1.3	1.76	4.77	0	0.87	4.76	2.815	41	101	143	153	151	123	11	53	19	30	79	0	15	85	50	LG3	6334427	6339423	-	--	--	PREDICTED: uncharacterized protein LOC109176783 [Ipomoea nil]	--	SubName: Full=uncharacterized protein LOC107795358 {ECO:0000313|RefSeq:XP_016473463.1, ECO:0000313|RefSeq:XP_016473464.1};	Ubiquitin C-terminal hydrolase	GO:0005840,ribosome; GO:0003735,structural constituent of ribosome; GO:0006412,translation	PF00861.22:Ribosomal L18 of archaea, bacteria, mitoch. and chloroplast
g10324	5.84	3.29	5.72	11.12	12.78	14.47	11.94	7.29	9.82	0.66	4.02	4.96	7.78	7.14	7.46	216	171	337	455	641	583	464	269	357	28	166	203	335	318	327	LG3	6344916	6352973	-	K05666 ATP-binding cassette, subfamily C (CFTR/MRP), member 2 | (RefSeq) ABC transporter C family member 10 (A)	ko02010: ABC transporters	PREDICTED: ABC transporter G family member 3-like [Ipomoea nil]	RecName: Full=ABC transporter G family member 3; Short=ABC transporter ABCG.3; Short=AtABCG3; AltName: Full=White-brown complex homolog protein 3; Short=AtWBC3;	SubName: Full=Abc transporter g family member 3 {ECO:0000313|EMBL:OIS96529.1};	Transporter, ABC superfamily (Breast cancer resistance protein)	GO:0016021,integral component of membrane; GO:0005886,plasma membrane; GO:0005524,ATP binding; GO:0042626,ATPase activity, coupled to transmembrane movement of substances	PF00005.27:ABC transporter
g10327	1.29	5.56	4.02	2.38	1.16	2.63	0	0	0	0.73	2.52	1.42	0.96	2.38	1.67	23	139	114	47	28	51	0	0	0	15	50	28	20	51	36	LG3	6376058	6377443	+	K18443 golgi-specific brefeldin A-resistance guanine nucleotide exchange factor 1 | (RefSeq) ARF guanine-nucleotide exchange factor GNL2-like (A)	ko04144: Endocytosis	PREDICTED: OBERON-like protein [Ipomoea nil]	RecName: Full=Protein OBERON 2; AltName: Full=Potyvirus VPg-interacting protein 1;	SubName: Full=Uncharacterized protein {ECO:0000313|EMBL:CCB51722.1};	--	GO:0005634,nucleus; GO:0046872,metal ion binding; GO:0046982,protein heterodimerization activity; GO:0042803,protein homodimerization activity; GO:0009793,embryo development ending in seed dormancy; GO:0010078,maintenance of root meristem identity; GO:0010492,maintenance of shoot apical meristem identity; GO:0080022,primary root development; GO:0010468,regulation of gene expression; GO:0010071,ro…	PF16312.5:Coiled-coil region of Oberon
g10329	223.24	187.47	227.13	176.05	101.46	185.62	116.68	91.67	108.48	124.09	127.21	126.65	119.01	119.76	119.385	4758	5614	7711	4154	2934	4311	2613	1949	2274	3046	3026	2987	2956	3074	3015	LG3	6378771	6384853	-	K02987 small subunit ribosomal protein S4e | (RefSeq) 40S ribosomal protein S4 (A)	ko03010: Ribosome	PREDICTED: 40S ribosomal protein S4 [Ipomoea nil]	RecName: Full=40S ribosomal protein S4;	RecName: Full=40S ribosomal protein S4 {ECO:0000256|PIRNR:PIRNR002116};	40S ribosomal protein S4	GO:0005840,ribosome; GO:0019843,rRNA binding; GO:0003735,structural constituent of ribosome; GO:0006412,translation	PF00900.20:Ribosomal family S4e
g1033	59.11	53.87	63.58	73.74	32.22	62.98	22.43	36.52	29.71	126.67	111.66	112.88	81.28	74.4	77.84	795	1018	1362	1098	588	923	317	490	393	1962	1676	1680	1274	1205	1240	LG1	6070169	6072752	-	K03937 NADH dehydrogenase (ubiquinone) Fe-S protein 4 | (RefSeq) NADH dehydrogenase [ubiquinone] iron-sulfur protein 4, mitochondrial (A)	ko00190: Oxidative phosphorylation	PREDICTED: NADH dehydrogenase [ubiquinone]	RecName: Full=NADH dehydrogenase [ubiquinone] iron-sulfur protein 4, mitochondrial; AltName: Full=Protein FROSTBITE1; Flags: Precursor;	SubName: Full=Nadh dehydrogenase [ubiquinone] iron-sulfur protein 4, mitochondrial {ECO:0000313|EMBL:OIT06435.1};	NADH:ubiquinone oxidoreductase, NDUFS4/18 kDa subunit	GO:0005747,mitochondrial respiratory chain complex I; GO:0005739,mitochondrion; GO:0050897,cobalt ion binding; GO:0008137,NADH dehydrogenase (ubiquinone) activity; GO:0009631,cold acclimation; GO:0022900,electron transport chain; GO:0006970,response to osmotic stress	PF04800.12:ETC complex I subunit conserved region
g10331	167.84	245.59	182.12	51.34	40.68	61.13	110.04	96.16	118.16	13.02	19.18	24.2	32.45	46.89	39.67	2250	4626	3889	762	740	893	1550	1286	1558	201	287	359	507	757	632	LG3	6406677	6408597	-	K09873 aquaporin TIP | (RefSeq) probable aquaporin TIP1-1 (A)	--	PREDICTED: probable aquaporin TIP1-1 [Ipomoea nil]	RecName: Full=Probable aquaporin TIP1-1; AltName: Full=Tonoplast intrinsic protein 1-1; Short=OsTIP1;1; AltName: Full=rTIP1;	SubName: Full=Aquaporin-like protein {ECO:0000313|EMBL:AAL49753.1};	Aquaporin (major intrinsic protein family)	GO:0042807,central vacuole; GO:0005887,integral component of plasma membrane; GO:0009705,plant-type vacuole membrane; GO:0015250,water channel activity; GO:0034220,ion transmembrane transport	PF00230.20:Major intrinsic protein
g10334	10.88	31.77	28.68	27.88	15.8	25	32.33	11.94	26.01	68.99	55.04	48.96	38.13	38.45	38.29	105	431	441	298	207	263	328	115	247	767	593	523	429	447	438	LG3	6421226	6422567	-	--	--	--	--	--	--	--	--
g10337	0.46	0	2.65	0	0.1	0.91	1.38	2.18	1.54	0	0	0	0	0	0	7	0	64	0	2	15	22	33	23	0	0	0	0	0	0	LG3	6452712	6454626	+	--	--	PREDICTED: zinc finger protein ZAT5-like [Ipomoea nil]	RecName: Full=Zinc finger protein ZAT5;	SubName: Full=Uncharacterized protein {ECO:0000313|EnsemblPlants:PGSC0003DMT400001104};	FOG: Zn-finger	GO:0005634,nucleus; GO:0003700,DNA-binding transcription factor activity; GO:0046872,metal ion binding; GO:0043565,sequence-specific DNA binding; GO:0006355,regulation of transcription, DNA-templated; GO:0006351,transcription, DNA-templated	PF13912.6:C2H2-type zinc finger
g1035	0	0	9.75	0	0	0	0	0	0	0	0	0	2.46	5.4	3.93	0	0	141	0	0	0	0	0	0	0	0	0	26	59	43	LG1	6078627	6079347	+	--	--	PREDICTED: uncharacterized protein LOC109191957 [Ipomoea nil]	--	SubName: Full=Uncharacterized protein {ECO:0000313|EMBL:KZM84933.1};	--	GO:0016021,integral component of membrane; GO:0008270,zinc ion binding	--
g10362	1	0.49	0	1.81	4.21	1.5	1.16	0	3.49	0	0	0	2	1.1	1.55	19	13	0	38	108	31	23	0	65	0	0	0	44	25	35	LG3	6706123	6708249	-	--	--	PREDICTED: uncharacterized protein LOC109164452 [Ipomoea nil]	RecName: Full=Uncharacterized mitochondrial protein AtMg00810; AltName: Full=ORF240b;	SubName: Full=Uncharacterized protein {ECO:0000313|EMBL:CAN67317.1};	FOG: Transposon-encoded proteins with TYA, reverse transcriptase, integrase domains in various combinations	GO:0005739,mitochondrion	--
g1039	251.13	225.62	249.62	175.2	66.96	151.96	120.84	97.77	133.27	137.73	144.69	168.02	127.99	134.89	131.44	5443	6871	8618	4204	1969	3589	2752	2114	2841	3438	3500	4030	3233	3521	3377	LG1	6094467	6096199	+	K02898 large subunit ribosomal protein L26e | (RefSeq) 60S ribosomal protein L26-1-like (A)	ko03010: Ribosome	putative L24 ribosomal protein [Ipomoea batatas]	RecName: Full=60S ribosomal protein L26-1;	SubName: Full=Putative L24 ribosomal protein {ECO:0000313|EMBL:AAY41426.1};	60S ribosomal protein L26	GO:0009507,chloroplast; GO:0005829,cytosol; GO:0022625,cytosolic large ribosomal subunit; GO:0022626,cytosolic ribosome; GO:0016020,membrane; GO:0005730,nucleolus; GO:0005634,nucleus; GO:0005886,plasma membrane; GO:0042788,polysomal ribosome; GO:0005774,vacuolar membrane; GO:0003729,mRNA binding; GO:0003723,RNA binding; GO:0003735,structural constituent of ribosome; GO:0002181,cytoplasmic transla…	PF16906.5:Ribosomal proteins L26 eukaryotic, L24P archaeal
g10398	3.05	0	1	0	0	0	0	0	0	0	0	0	0	0	0	69	0	36	0	0	0	0	0	0	0	0	0	0	0	0	LG3	6961044	6962611	+	K13065 shikimate O-hydroxycinnamoyltransferase [EC:2.3.1.133] | (RefSeq) agmatine coumaroyltransferase-2-like (A)	ko00940: Phenylpropanoid biosynthesis; ko00941: Flavonoid biosynthesis; ko00945: Stilbenoid, diarylheptanoid and gingerol biosynthesis	PREDICTED: agmatine coumaroyltransferase-2-like [Ipomoea nil]	RecName: Full=Agmatine coumaroyltransferase-2 {ECO:0000303|PubMed:18270436, ECO:0000312|EMBL:BAF97627.1}; EC=2.3.1.64;	SubName: Full=agmatine coumaroyltransferase-2-like {ECO:0000313|RefSeq:XP_016436772.1};	--	GO:0047634,agmatine N4-coumaroyltransferase activity	PF02458.15:Transferase family
g104	0.51	0.29	1.83	1.15	1.09	0.47	0	0	0	0.98	0.41	0	0.61	0.21	0.41	10	8	57	25	29	10	0	0	0	22	9	0	14	5	10	LG1	628314	632425	+	--	--	PREDICTED: NAC domain-containing protein 37-like [Ipomoea nil]	RecName: Full=NAC domain-containing protein 100 {ECO:0000303|PubMed:15029955}; Short=ANAC100 {ECO:0000303|PubMed:15029955}; Short=AtNAC5;	SubName: Full=Protein CUP-SHAPED COTYLEDON 2 {ECO:0000313|EMBL:KYP69756.1};	--	GO:0005634,nucleus; GO:0003677,DNA binding; GO:0003700,DNA-binding transcription factor activity; GO:0006351,transcription, DNA-templated	PF02365.15:No apical meristem (NAM) protein
g10403	146.67	2.27	123.84	1.53	2.58	1.66	0	0	0	0	0.67	0	0	0	0	3725	81	5010	43	89	46	0	0	0	0	19	0	0	0	0	LG3	7024724	7028232	+	K13065 shikimate O-hydroxycinnamoyltransferase [EC:2.3.1.133] | (RefSeq) agmatine coumaroyltransferase-2-like (A)	ko00940: Phenylpropanoid biosynthesis; ko00941: Flavonoid biosynthesis; ko00945: Stilbenoid, diarylheptanoid and gingerol biosynthesis	PREDICTED: agmatine coumaroyltransferase-2-like [Ipomoea nil]	RecName: Full=Agmatine coumaroyltransferase-2 {ECO:0000303|PubMed:18270436, ECO:0000312|EMBL:BAF97627.1}; EC=2.3.1.64;	SubName: Full=agmatine coumaroyltransferase-2-like {ECO:0000313|RefSeq:XP_016436772.1};	--	GO:0047634,agmatine N4-coumaroyltransferase activity	PF02458.15:Transferase family
g10407	4.21	2.52	3.56	5.48	5.63	5.7	5.3	2.83	7.91	9.05	7.65	8.29	8.55	8.89	8.72	118	99	159	170	214	174	156	79	218	292	239	257	279	300	290	LG3	7049654	7053140	+	K08832 serine/threonine-protein kinase SRPK3 [EC:2.7.11.1] | (RefSeq) serine/threonine-protein kinase SRPK-like (A)	--	PREDICTED: serine/threonine-protein kinase SRPK-like [Ipomoea nil]	RecName: Full=Serine/threonine-protein kinase AFC2; EC=2.7.12.1;	SubName: Full=serine/threonine-protein kinase spk-1 {ECO:0000313|RefSeq:XP_016469340.1};	Serine/threonine protein kinase	GO:0005524,ATP binding; GO:0004672,protein kinase activity; GO:0004674,protein serine/threonine kinase activity; GO:0004712,protein serine/threonine/tyrosine kinase activity; GO:0006397,mRNA processing; GO:0046777,protein autophosphorylation	PF00069.25:Protein kinase domain
g10413	142.36	138.6	115.99	155.93	80.17	149.74	58.18	58.49	59.58	131.83	122.79	135.38	100.29	91.13	95.71	2196	3004	2850	2663	1678	2517	943	900	904	2342	2114	2311	1803	1693	1748	LG3	7097012	7098080	+	K02989 small subunit ribosomal protein S5e | (RefSeq) 40S ribosomal protein S5-like (A)	ko03010: Ribosome	PREDICTED: 40S ribosomal protein S5-like isoform X1 [Ipomoea nil]	RecName: Full=40S ribosomal protein S5; Flags: Fragment;	SubName: Full=40S ribosomal protein S5 {ECO:0000313|RefSeq:XP_009782596.1};	Ribosomal protein S7	GO:0015935,small ribosomal subunit; GO:0003723,RNA binding; GO:0003735,structural constituent of ribosome; GO:0006412,translation	PF00177.21:Ribosomal protein S7p/S5e
g10414	1.59	6.32	2.57	3.67	4.31	4.24	3.07	1.68	6.6	3.35	1.85	0.29	12.3	3.34	7.82	40	223	103	102	147	116	81	42	163	97	52	8	360	101	231	LG3	7099092	7102756	+	K12449 UDP-apiose/xylose synthase | (RefSeq) UDP-D-apiose/UDP-D-xylose synthase 2-like (A)	ko00520: Amino sugar and nucleotide sugar metabolism	PREDICTED: UDP-D-apiose/UDP-D-xylose synthase 2-like [Ipomoea nil]	RecName: Full=UDP-D-apiose/UDP-D-xylose synthase 2;	SubName: Full=UDP-D-apiose/UDP-D-xylose synthase 2 {ECO:0000313|RefSeq:XP_016447409.1, ECO:0000313|RefSeq:XP_016447410.1};	dTDP-glucose 4-6-dehydratase/UDP-glucuronic acid decarboxylase	GO:0048046,apoplast; GO:0005737,cytoplasm; GO:0005829,cytosol; GO:0003824,catalytic activity; GO:0050662,coenzyme binding; GO:0071555,cell wall organization	PF01370.21:NAD dependent epimerase/dehydratase family
g10418	3.07	3.74	0	0	0.06	0	0	1.22	8.14	1.19	7.25	2.19	2.01	1.75	1.88	38	65	0	0	1	0	0	15	99	17	100	30	29	26	28	LG3	7122617	7130667	-	--	--	--	--	--	--	--	--
g10419	8.32	10.26	7.73	1.83	1.11	1.44	0	6.11	8.59	6.14	3.35	4.44	7.7	6.58	7.14	127	220	188	31	23	24	0	93	129	108	57	75	137	121	129	LG3	7130822	7132260	+	--	--	PREDICTED: uncharacterized protein C227.17c-like [Ipomoea nil]	--	SubName: Full=Uncharacterized protein {ECO:0000313|EnsemblPlants:Solyc01g086860.2.1};	--	--	PF11326.8:Protein of unknown function (DUF3128)
g1042	0	0	0	0	0.66	0	0	0	0	4.59	5.35	16.26	0	0.86	0.43	0	0	0	0	13	0	0	0	0	77	87	262	0	15	8	LG1	6107267	6108452	-	--	--	PREDICTED: BTB/POZ domain-containing protein At3g49900 [Ipomoea nil]	RecName: Full=BTB/POZ domain-containing protein At3g49900;	SubName: Full=Uncharacterized protein {ECO:0000313|EnsemblPlants:PGSC0003DMT400055244};	--	GO:0016567,protein ubiquitination	--
g10427	2.38	2.65	1.66	6.82	15.28	7.93	3.79	7.98	17.77	4.18	6.67	3.79	7.99	4.59	6.29	46	72	51	146	401	167	77	154	338	93	144	81	180	107	144	LG3	7241041	7243827	-	--	--	--	--	--	--	--	--
g10428	0.48	1.09	1.82	1.89	1.16	8.58	0.08	0.44	0.2	0.38	5.02	1.24	0.62	7.73	4.175	12	38	72	52	39	232	2	11	5	11	139	34	18	231	125	LG3	7246089	7249727	+	K12449 UDP-apiose/xylose synthase | (RefSeq) UDP-D-apiose/UDP-D-xylose synthase 2-like (A)	ko00520: Amino sugar and nucleotide sugar metabolism	PREDICTED: UDP-D-apiose/UDP-D-xylose synthase 2-like [Ipomoea nil]	RecName: Full=UDP-D-apiose/UDP-D-xylose synthase 2;	SubName: Full=UDP-D-apiose/UDP-D-xylose synthase 2 {ECO:0000313|RefSeq:XP_016447409.1, ECO:0000313|RefSeq:XP_016447410.1};	dTDP-glucose 4-6-dehydratase/UDP-glucuronic acid decarboxylase	GO:0048046,apoplast; GO:0005737,cytoplasm; GO:0005829,cytosol; GO:0003824,catalytic activity; GO:0050662,coenzyme binding; GO:0071555,cell wall organization	PF01370.21:NAD dependent epimerase/dehydratase family
g10429	5.36	2.8	1.09	3.67	6.95	5.7	3.61	4.83	6.22	5.99	3.7	6.4	0.85	2.13	1.49	326	239	106	247	574	378	231	293	372	420	251	431	60	156	108	LG3	7251019	7264440	+	K11824 AP-2 complex subunit alpha | (RefSeq) AP-2 complex subunit alpha-1-like (A)	ko04144: Endocytosis	PREDICTED: AP-2 complex subunit alpha-1-like isoform X4 [Ipomoea nil]	RecName: Full=AP-2 complex subunit alpha-1; AltName: Full=Adaptor protein complex AP-2 subunit alpha-1; AltName: Full=Adaptor-related protein complex 2 subunit alpha-1; AltName: Full=Alpha-adaptin 1; AltName: Full=Clathrin assembly protein complex 2 alpha large chain 1; Short=At-a-Ad; Short=At-alpha-Ad;	RecName: Full=AP-2 complex subunit alpha {ECO:0000256|PIRNR:PIRNR037091};	Vesicle coat complex AP-2, alpha subunit	GO:0030131,clathrin adaptor complex; GO:0005905,clathrin-coated pit; GO:0016020,membrane; GO:0005886,plasma membrane; GO:0008289,lipid binding; GO:0008565,protein transporter activity; GO:0006897,endocytosis; GO:0006886,intracellular protein transport	PF01602.20:Adaptin N terminal region
g1043	0	0	0	0	0.21	0.05	0	0	0	0.58	1.31	2.53	0	0.47	0.235	0	0	0	0	5	1	0	0	0	12	26	50	0	10	5	LG1	6108583	6111362	-	--	--	PREDICTED: BTB/POZ domain-containing protein At3g49900 [Ipomoea nil]	RecName: Full=BTB/POZ domain-containing protein At3g49900;	SubName: Full=BTB/POZ domain-containing protein At3g49900-like {ECO:0000313|RefSeq:XP_016481489.1};	--	GO:0016567,protein ubiquitination	PF00651.31:BTB/POZ domain
g10430	0.07	0.15	0.21	0.43	0.61	1.57	2.41	1.03	2.92	0	2.27	6	1.65	1.19	1.42	1	3	5	7	12	25	37	15	42	0	37	97	28	21	25	LG3	7265229	7266627	+	--	--	PREDICTED: uncharacterized protein C227.17c-like [Ipomoea nil]	--	SubName: Full=Uncharacterized protein {ECO:0000313|EMBL:PHT93562.1};	--	--	PF11326.8:Protein of unknown function (DUF3128)
g10443	4.7	0.49	3.58	0.93	2.1	1.76	0	0.52	0	1.94	1.54	0.87	0.41	0.37	0.39	137	20	166	30	83	56	0	15	0	65	50	28	14	13	14	LG3	7358669	7364118	+	K13680 beta-mannan synthase [EC:2.4.1.32] | (RefSeq) glucomannan 4-beta-mannosyltransferase 2-like (A)	--	PREDICTED: glucomannan 4-beta-mannosyltransferase 2-like [Ipomoea nil]	RecName: Full=Glucomannan 4-beta-mannosyltransferase 2; EC=2.4.1.32; AltName: Full=Cellulose synthase-like protein A2; Short=AtCslA2; AltName: Full=Glucomannan synthase; AltName: Full=Mannan synthase 2;	SubName: Full=Uncharacterized protein {ECO:0000313|EnsemblPlants:PGSC0003DMT400018425};	--	GO:0005794,Golgi apparatus; GO:0000139,Golgi membrane; GO:0016021,integral component of membrane; GO:0047259,glucomannan 4-beta-mannosyltransferase activity; GO:0051753,mannan synthase activity; GO:0071555,cell wall organization; GO:0010192,mucilage biosynthetic process; GO:0048359,mucilage metabolic process involved in seed coat development	PF13632.6:Glycosyl transferase family group 2
g10445	6.72	16.04	3.64	4.03	8	3.29	14.62	22.26	14.01	13.59	9.24	3.36	6.77	6.1	6.435	161	540	139	107	260	86	368	532	330	375	247	89	189	176	183	LG3	7376029	7381776	+	K12836 splicing factor U2AF 35 kDa subunit | (RefSeq) splicing factor U2af small subunit B-like (A)	ko03040: Spliceosome	PREDICTED: splicing factor U2af small subunit B-like [Ipomoea nil]	RecName: Full=Splicing factor U2af small subunit A; AltName: Full=U2 auxiliary factor 35 kDa subunit A; AltName: Full=U2 small nuclear ribonucleoprotein auxiliary factor small subunit A; Short=U2 snRNP auxiliary factor small subunit A; AltName: Full=Zinc finger CCCH domain-containing protein 60; Short=OsC3H60;	SubName: Full=splicing factor U2af small subunit B-like {ECO:0000313|RefSeq:XP_009759515.1, ECO:0000313|RefSeq:XP_009759516.1, ECO:0000313|RefSeq:XP_009759517.1};	U2 snRNP splicing factor, small subunit, and related proteins	GO:0005681,spliceosomal complex; GO:0089701,U2AF; GO:0003677,DNA binding; GO:0046872,metal ion binding; GO:0030628,pre-mRNA 3'-splice site binding; GO:0000398,mRNA splicing, via spliceosome	PF00642.24:Zinc finger C-x8-C-x5-C-x3-H type (and similar)
g10446	79.76	81.18	91.59	63.87	34.09	63.49	55.36	59.45	59.46	77.67	93.31	78.46	40.43	44.82	42.625	2035	2910	3722	1804	1180	1765	1484	1513	1492	2282	2657	2215	1202	1377	1290	LG3	7383377	7389294	-	--	--	PREDICTED: histone deacetylase HDT1-like [Ipomoea nil]	RecName: Full=Histone deacetylase HDT1; AltName: Full=HD-tuins protein 1; AltName: Full=Histone deacetylase 2a;	SubName: Full=Uncharacterized protein {ECO:0000313|EMBL:EYU36981.1};	--	GO:0005730,nucleolus; GO:0004407,histone deacetylase activity; GO:0046872,metal ion binding; GO:0003676,nucleic acid binding; GO:0009294,DNA mediated transformation; GO:0009944,polarity specification of adaxial/abaxial axis; GO:0006355,regulation of transcription, DNA-templated; GO:0048364,root development; GO:0010162,seed dormancy process; GO:0006351,transcription, DNA-templated	PF17800.1:Nucleoplasmin-like domain
g10447	2.85	3.61	4.81	0	0	0	6.51	5.59	10.05	2.92	9.93	10.3	1.68	5.89	3.785	45	80	121	0	0	0	108	88	156	53	175	180	31	112	72	LG3	7393453	7395244	-	--	--	PREDICTED: uncharacterized protein LOC109158491 [Ipomoea nil]	--	SubName: Full=Uncharacterized protein ORF1 {ECO:0000313|EMBL:CAC09928.1};	FOG: PPR repeat	--	--
g10449	23.32	23.49	26.32	3.02	2.41	1.5	29.42	55.35	38.82	39.98	30.99	20.6	11.24	17.73	14.485	356	504	640	51	50	25	472	843	583	703	528	348	200	326	263	LG3	7409186	7410784	-	--	--	PREDICTED: uncharacterized protein LOC109158491 [Ipomoea nil]	RecName: Full=Uncharacterized protein At4g22758;	SubName: Full=Uncharacterized protein {ECO:0000313|EMBL:OIT23223.1};	FOG: PPR repeat	--	PF16978.5:SAPK-interacting protein 1 (Sin1), middle CRIM domain
g1045	3.68	3.43	3.91	10.57	8.07	12.33	10.62	7.93	12.62	4.23	8.69	7.3	6.23	6.21	6.22	68	89	115	216	202	248	206	146	229	90	179	149	134	138	136	LG1	6115163	6117852	-	K15040 voltage-dependent anion channel protein 2 | (RefSeq) mitochondrial outer membrane protein porin 2-like (A)	--	PREDICTED: mitochondrial outer membrane protein porin 2-like [Ipomoea nil]	RecName: Full=Mitochondrial outer membrane protein porin 2; AltName: Full=Voltage-dependent anion-selective channel protein 2; Short=AtVDAC2; Short=VDAC-2;	SubName: Full=Mitochondrial outer membrane protein porin 2 {ECO:0000313|EMBL:OIT08535.1};	Porin/voltage-dependent anion-selective channel protein	GO:0005741,mitochondrial outer membrane; GO:0046930,pore complex; GO:0015288,porin activity; GO:0006811,ion transport; GO:0040008,regulation of growth	PF01459.22:Eukaryotic porin
g10451	0	0	0	11.73	6.81	19.97	0	0	0	4.21	2.79	0	0	0	0	0	0	0	142	101	238	0	0	0	53	34	0	0	0	0	LG3	7434485	7438431	-	K15255 ATP-dependent DNA helicase PIF1 [EC:3.6.4.12] | (RefSeq) uncharacterized LOC109159154 (A)	--	PREDICTED: uncharacterized protein LOC109188848 [Ipomoea nil]	--	RecName: Full=ATP-dependent DNA helicase {ECO:0000256|RuleBase:RU363044}; EC=3.6.4.12 {ECO:0000256|RuleBase:RU363044};	DNA helicase PIF1/RRM3	GO:0005524,ATP binding; GO:0003678,DNA helicase activity; GO:0006310,DNA recombination; GO:0006281,DNA repair; GO:0000723,telomere maintenance	PF05970.14:PIF1-like helicase
g10453	13.31	9.97	11.34	12.38	21.46	12.98	13.54	13.45	6.91	5.66	7.11	5.87	7.92	11.93	9.925	607	639	824	625	1328	645	649	612	310	297	362	296	421	655	538	LG3	7448064	7458691	-	K14611 solute carrier family 23 (nucleobase transporter), member 1 | (RefSeq) nucleobase-ascorbate transporter 11 (A)	--	PREDICTED: nucleobase-ascorbate transporter 12 [Ipomoea nil]	RecName: Full=Nucleobase-ascorbate transporter 12; Short=AtNAT12;	SubName: Full=Nucleobase-ascorbate transporter 12 isoform 1 {ECO:0000313|EMBL:EOY33555.1};	Xanthine/uracil transporters	GO:0016021,integral component of membrane; GO:0005886,plasma membrane; GO:0015207,adenine transmembrane transporter activity; GO:0015208,guanine transmembrane transporter activity; GO:0015294,solute:cation symporter activity; GO:0015210,uracil transmembrane transporter activity; GO:0098702,adenine import across plasma membrane; GO:0098710,guanine import across plasma membrane; GO:0035344,hypoxant…	PF00860.20:Permease family
g10458	0	0.92	0	0.12	0	0	0	1.68	0	0.78	2.59	1.74	0	0.05	0.025	0	20	0	2	0	0	0	26	0	14	45	30	0	1	1	LG3	7496355	7498191	-	--	--	PREDICTED: uncharacterized protein LOC109158492 [Ipomoea nil]	--	SubName: Full=uncharacterized protein LOC104244734 {ECO:0000313|RefSeq:XP_009798512.1};	--	--	PF04949.13:Transcriptional activator
g1046	62.34	72.28	48.25	151.14	183.84	142.13	211.86	250.24	230.38	47.39	51.12	45.73	23.31	23.27	23.29	1237	2015	1525	3320	4949	3073	4417	4953	4496	1083	1132	1004	539	556	548	LG1	6119227	6123240	+	K04498 E1A/CREB-binding protein [EC:2.3.1.48] | (RefSeq) histone acetyltransferase HAC1-like (A)	--	PREDICTED: BTB/POZ and TAZ domain-containing protein 4-like isoform X1 [Ipomoea nil]	RecName: Full=BTB/POZ and TAZ domain-containing protein 4; AltName: Full=BTB and TAZ domain protein 4;	SubName: Full=BTB/POZ and TAZ domain-containing protein 4 {ECO:0000313|EMBL:PHT56768.1};	CREB binding protein/P300 and related TAZ Zn-finger proteins	GO:0005737,cytoplasm; GO:0005634,nucleus; GO:0019005,SCF ubiquitin ligase complex; GO:0005774,vacuolar membrane; GO:0005516,calmodulin binding; GO:0004402,histone acetyltransferase activity; GO:0003712,transcription coregulator activity; GO:0031625,ubiquitin protein ligase binding; GO:0008270,zinc ion binding; GO:0043161,proteasome-mediated ubiquitin-dependent protein catabolic process; GO:004278…	PF02135.16:TAZ zinc finger
g10466	174.99	136.23	153.4	112.64	40.08	101.41	74.02	65.01	81.28	280.49	242.87	242.34	75.52	86.26	80.89	2909	3182	4062	2073	904	1837	1293	1078	1329	5370	4506	4458	1463	1727	1595	LG3	7552616	7555131	+	--	--	PREDICTED: uncharacterized protein LOC106295319 [Brassica oleracea var. oleracea]	--	SubName: Full=Uncharacterized protein {ECO:0000313|EnsemblPlants:Bo1g023840.1};	--	GO:0016021,integral component of membrane	PF02238.15:Cytochrome c oxidase subunit VII
g10467	24.17	17.36	21.43	24.95	15.87	18.22	31.65	17.84	8.79	46.43	36.49	40.65	19.17	26.09	22.63	330	333	466	377	294	271	454	243	118	730	556	614	305	429	367	LG3	7555436	7558081	-	K01104 protein-tyrosine phosphatase [EC:3.1.3.48] | (RefSeq) putative low molecular weight protein-tyrosine-phosphatase slr0328 (A)	--	PREDICTED: uncharacterized protein LOC109158488 isoform X1 [Ipomoea nil]	--	SubName: Full=low molecular weight phosphotyrosine protein phosphatase {ECO:0000313|RefSeq:XP_009790865.1};	Protein tyrosine phosphatase	GO:0004725,protein tyrosine phosphatase activity	PF01451.21:Low molecular weight phosphotyrosine protein phosphatase
g1047	0.39	0	0	0.61	0.57	0.13	0.58	0.58	0	0	0	0	0.25	0.97	0.61	16	0	0	28	32	6	25	24	0	0	0	0	12	48	30	LG1	6124019	6127812	-	--	--	PREDICTED: formin-like protein 6 isoform X1 [Ipomoea nil]	RecName: Full=Formin-like protein 6; Short=AtFH6; Short=AtFORMIN-6; Flags: Precursor;	RecName: Full=Formin-like protein {ECO:0000256|RuleBase:RU361260};	Rho GTPase effector BNI1 and related formins	GO:0005618,cell wall; GO:0005737,cytoplasm; GO:0016021,integral component of membrane; GO:0005730,nucleolus; GO:0005634,nucleus; GO:0009524,phragmoplast; GO:0005886,plasma membrane; GO:0005819,spindle; GO:0003779,actin binding	PF02181.23:Formin Homology 2 Domain
g10474	542.79	529.36	783.45	365.19	127.48	265.67	160.67	179.95	140.68	290.69	358.55	327.97	273.05	333.61	303.33	4723	6472	10859	3518	1505	2519	1469	1562	1204	2913	3482	3158	2769	3496	3133	LG3	7600627	7601381	-	K02943 large subunit ribosomal protein LP2 | (RefSeq) 60S acidic ribosomal protein P2A-like (A)	ko03010: Ribosome	PREDICTED: 60S acidic ribosomal protein P2A-like [Ipomoea nil]	RecName: Full=60S acidic ribosomal protein P2;	SubName: Full=Putative 60S acidic ribosomal protein P2-like {ECO:0000313|EMBL:JAP16204.1};	60S acidic ribosomal protein P2	GO:0005840,ribosome; GO:0003735,structural constituent of ribosome; GO:0006414,translational elongation	PF00428.19:60s Acidic ribosomal protein
g10480	2.9	1.32	7.71	0	0.17	0.11	0	0	4.36	0	0.93	0	1.49	1.06	1.275	25	16	106	0	2	1	0	0	37	0	9	0	15	11	13	LG3	7651808	7652405	+	--	--	PREDICTED: zinc-finger homeodomain protein 1-like isoform X2 [Ipomoea nil]	--	SubName: Full=Uncharacterized protein {ECO:0000313|EnsemblPlants:GSMUA_Achr6P28870_001};	--	GO:0003677,DNA binding	PF04770.12:ZF-HD protein dimerisation region
g10482	0.97	0.32	0.62	0.31	0.01	0.22	0	0	0	0	0	0	1.58	1.08	1.33	48	22	49	17	1	12	0	0	0	0	0	0	91	64	78	LG3	7661548	7666570	+	K20367 endoplasmic reticulum-Golgi intermediate compartment protein 3 | (RefSeq) exocyst complex component SEC8-like (A)	--	PREDICTED: uncharacterized protein LOC109183793 [Ipomoea nil]	--	SubName: Full=Uncharacterized protein {ECO:0000313|EMBL:KYP50540.1}; Flags: Fragment;	--	--	PF02992.14:Transposase family tnp2
g10488	0.45	0.62	0.55	1.23	1.16	0.55	0.78	0.25	0.08	0	0.17	0.39	0.13	0.31	0.22	23	45	45	70	81	31	42	13	4	0	10	22	8	19	14	LG3	7757628	7770187	+	K13691 pathogen-inducible salicylic acid glucosyltransferase [EC:2.4.1.-] | (RefSeq) UDP-glycosyltransferase 74E2-like (A)	--	PREDICTED: AT-rich interactive domain-containing protein 5 isoform X1 [Ipomoea nil]	RecName: Full=AT-rich interactive domain-containing protein 5; Short=ARID domain-containing protein 5;	SubName: Full=AT-rich interactive domain-containing protein 5 {ECO:0000313|EMBL:PHT85079.1};	DNA-binding proteins Bright/BRCAA1/RBP1 and related proteins containing BRIGHT domain	GO:0005634,nucleus; GO:0000977,RNA polymerase II regulatory region sequence-specific DNA binding; GO:0001228,DNA-binding transcription activator activity, RNA polymerase II-specific	PF01388.21:ARID/BRIGHT DNA binding domain
g1049	0.31	0	0	2.67	5.96	1.68	0.41	4.79	1.15	2.16	3.13	2.11	3.9	3.23	3.565	8	0	0	76	208	47	11	123	29	64	90	60	117	100	109	LG1	6143181	6145172	-	--	--	PREDICTED: probable N-acetyltransferase HLS1 [Ipomoea nil]	RecName: Full=Probable N-acetyltransferase HLS1; EC=2.3.1.-; AltName: Full=Protein CONSTITUTIVE PHOTOMORPHOGENIC 3; AltName: Full=Protein HOOKLESS 1; AltName: Full=Protein UNUSUAL SUGAR RESPONSE 2;	SubName: Full=Uncharacterized protein {ECO:0000313|EMBL:PIN25698.1};	--	GO:0008080,N-acetyltransferase activity; GO:0016747,transferase activity, transferring acyl groups other than amino-acyl groups; GO:0009734,auxin-activated signaling pathway; GO:0009640,photomorphogenesis; GO:0006473,protein acetylation; GO:0040008,regulation of growth; GO:0009723,response to ethylene; GO:0009826,unidimensional cell growth	PF00583.25:Acetyltransferase (GNAT) family
g10493	3.53	24.22	6.86	0	0	0	30.71	36.06	29.04	45.47	41.24	71.39	0.15	0.15	0.15	20	193	62	0	0	0	183	204	162	297	261	448	1	1	1	LG3	7783881	7784273	-	--	--	--	--	--	--	--	--
g10494	1.49	2.22	4.2	3.26	2.69	6.4	5.86	2.8	5.87	7.73	7.45	8.26	1.77	0.84	1.305	31	65	139	75	76	145	128	58	120	185	173	190	43	21	32	LG3	7784408	7786302	+	K02900 large subunit ribosomal protein L27Ae | (RefSeq) 60S ribosomal protein L27a-3-like (A)	ko03010: Ribosome	60S ribosomal protein L27a-2-like [Olea europaea var. sylvestris]	RecName: Full=60S ribosomal protein L27a-2;	SubName: Full=Uncharacterized protein {ECO:0000313|EMBL:ABK92884.1};	60s ribosomal protein L15/L27	GO:0022625,cytosolic large ribosomal subunit; GO:0022626,cytosolic ribosome; GO:0005730,nucleolus; GO:0009506,plasmodesma; GO:0003723,RNA binding; GO:0003735,structural constituent of ribosome; GO:0002181,cytoplasmic translation; GO:0009908,flower development; GO:0010229,inflorescence development; GO:0009791,post-embryonic development	--
g10502	0	0.22	0	0.13	0.26	0.13	0.02	0.02	0	0.62	0.82	0.24	0.02	0.22	0.12	0	18	0	8	20	8	1	1	0	41	52	15	1	15	8	LG3	7834644	7842268	-	--	--	PREDICTED: uncharacterized protein LOC109169475 [Ipomoea nil]	--	SubName: Full=Uncharacterized protein {ECO:0000313|EnsemblPlants:GLYMA15G38460.1};	--	--	PF02992.14:Transposase family tnp2
g10503	0	0.83	0	0.63	1.5	1.22	1.49	0	1.19	0	0	0	0	0	0	0	30	0	18	52	34	40	0	30	0	0	0	0	0	0	LG3	7856163	7859334	+	--	--	PREDICTED: uncharacterized protein LOC109176397 [Ipomoea nil]	--	--	--	--	PF13966.6:zinc-binding in reverse transcriptase
g1052	53.5	93.44	76.62	9.7	5.61	7.39	93.99	84.93	76.04	28.24	30.04	37.07	12.32	30.17	21.245	857	2103	1955	172	122	129	1582	1357	1198	521	537	657	230	582	406	LG1	6191537	6193095	+	--	--	PREDICTED: LOB domain-containing protein 37-like [Ipomoea nil]	RecName: Full=LOB domain-containing protein 37; AltName: Full=ASYMMETRIC LEAVES 2-like protein 39; Short=AS2-like protein 39;	SubName: Full=LOB domain-containing protein 37-like {ECO:0000313|RefSeq:XP_016476789.1};	--	GO:0006807,nitrogen compound metabolic process; GO:0060776,simple leaf morphogenesis	PF03195.14:Lateral organ boundaries (LOB) domain
g1053	3.04	5.09	1.01	5.35	4.71	3.92	7.17	9.74	3.48	2.69	4.48	5.55	2.25	3.6	2.925	96	226	51	187	202	135	238	307	108	98	158	194	83	137	110	LG1	6203867	6210025	+	--	--	PREDICTED: uncharacterized protein LOC109189096 isoform X1 [Ipomoea nil]	--	SubName: Full=uncharacterized protein LOC107759553 {ECO:0000313|RefSeq:XP_016433003.1};	--	GO:0070461,SAGA-type complex	PF12767.7:Transcriptional regulator of RNA polII, SAGA, subunit
g10533	2.2	2.64	0.17	0.45	1.96	1.97	2.79	0	3.72	0	4.51	3.47	0	0	0	48	81	6	11	58	47	64	0	80	0	110	84	0	0	0	LG3	8106218	8112737	+	K12611 mRNA-decapping enzyme 1B [EC:3.-.-.-] | (RefSeq) mRNA-decapping enzyme-like protein (A)	ko03018: RNA degradation	PREDICTED: mRNA-decapping enzyme-like protein [Ipomoea nil]	RecName: Full=mRNA-decapping enzyme-like protein; EC=3.-.-.-; AltName: Full=DCP1 homolog;	SubName: Full=Uncharacterized protein {ECO:0000313|EMBL:CDP06884.1};	Decapping enzyme complex component DCP1	GO:0005737,cytoplasm; GO:0000932,P-body; GO:0008047,enzyme activator activity; GO:0030234,enzyme regulator activity; GO:0016787,hydrolase activity; GO:0003729,mRNA binding; GO:0000290,deadenylation-dependent decapping of nuclear-transcribed mRNA; GO:0031087,deadenylation-independent decapping of nuclear-transcribed mRNA; GO:0006952,defense response; GO:0006397,mRNA processing	PF06058.13:Dcp1-like decapping family
g10534	5.96	6.13	0.06	0.17	0.14	0	0.87	0.09	0	0.56	0	0	5.82	3.81	4.815	65	94	1	2	2	0	10	1	0	7	0	0	74	50	62	LG3	8115378	8117083	+	K14332 photosystem I subunit PsaO | (RefSeq) photosystem I subunit O (A)	ko00195: Photosynthesis	PREDICTED: photosystem I subunit O [Ipomoea nil]	RecName: Full=Photosystem I subunit O; Short=PSI-O; Flags: Precursor;	SubName: Full=Uncharacterized protein {ECO:0000313|EMBL:KDO58276.1};	--	GO:0009507,chloroplast; GO:0009535,chloroplast thylakoid membrane; GO:0016021,integral component of membrane; GO:0009522,photosystem I; GO:0009579,thylakoid; GO:0009768,photosynthesis, light harvesting in photosystem I; GO:0009767,photosynthetic electron transport chain	--
g10537	4.65	5.72	10.57	8.13	3.57	8.26	6.72	9.8	8.86	4.96	4.68	2.89	2.91	3.46	3.185	48	83	174	93	50	93	73	101	90	59	54	33	35	43	39	LG3	8134638	8137349	+	--	--	PREDICTED: uncharacterized protein LOC109153584 [Ipomoea nil]	--	--	--	--	--
g1054	14.63	6	6.58	15.4	5.76	14.16	35.1	21.31	20.73	16.79	24.44	20.89	23.24	20.64	21.94	236	136	169	275	126	249	595	343	329	312	440	373	437	401	419	LG1	6219647	6221197	+	--	--	PREDICTED: uncharacterized protein LOC109189099 [Ipomoea nil]	--	SubName: Full=uncharacterized protein LOC107805273 {ECO:0000313|RefSeq:XP_016484757.1, ECO:0000313|RefSeq:XP_016484758.1, ECO:0000313|RefSeq:XP_016484759.1};	--	--	--
g10541	0.18	2.07	3.32	1.65	2.48	2.34	0.26	0.82	2.78	0	0	0	0.16	0.76	0.46	2	32	58	20	37	28	3	9	30	0	0	0	2	10	6	LG3	8172302	8173776	+	K14332 photosystem I subunit PsaO | (RefSeq) photosystem I subunit O (A)	ko00195: Photosynthesis	PREDICTED: photosystem I subunit O [Ipomoea nil]	RecName: Full=Photosystem I subunit O; Short=PSI-O; Flags: Precursor;	SubName: Full=Uncharacterized protein {ECO:0000313|EMBL:KDO58276.1};	--	GO:0009507,chloroplast; GO:0009535,chloroplast thylakoid membrane; GO:0016021,integral component of membrane; GO:0009522,photosystem I; GO:0009579,thylakoid; GO:0009768,photosynthesis, light harvesting in photosystem I; GO:0009767,photosynthetic electron transport chain	--
g1055	9.56	17.77	10.18	31.29	47.94	31.89	13.83	10.51	17.05	31.26	32.56	27.26	42.67	41.83	42.25	342	893	580	1239	2327	1243	520	375	600	1288	1300	1079	1779	1802	1791	LG1	6223120	6228962	-	--	--	PREDICTED: BTB/POZ domain-containing protein At5g67385-like isoform X2 [Ipomoea nil]	RecName: Full=BTB/POZ domain-containing protein SR1IP1 {ECO:0000305}; AltName: Full=Protein ATSR1-INTERACTION PROTEIN 1 {ECO:0000303|PubMed:24528504};	SubName: Full=BTB/POZ domain-containing protein At5g67385 {ECO:0000313|RefSeq:XP_009782405.1};	--	GO:0042742,defense response to bacterium; GO:0016567,protein ubiquitination	PF03000.14:NPH3 family
g10552	0	0	0	0.17	0.21	0.23	0.03	0.74	0.79	0	0	0	0.8	0.41	0.605	0	0	0	6	9	8	1	24	25	0	0	0	30	16	23	LG3	8253682	8257008	+	--	--	--	--	--	--	--	--
g10566	62.86	27.59	71.47	23.63	9.7	26.99	12.85	16.45	17.6	20.38	11.7	16	22.21	17.91	20.06	1122	692	2032	467	235	525	241	293	309	419	233	316	462	385	424	LG3	8380773	8382235	+	--	--	PREDICTED: cytochrome b-c1 complex subunit 9-like [Malus domestica]	RecName: Full=Cytochrome b-c1 complex subunit 9; AltName: Full=Complex III subunit 9; AltName: Full=Complex III subunit X; AltName: Full=Ubiquinol-cytochrome c reductase complex 8.0 kDa protein;	SubName: Full=cytochrome b-c1 complex subunit 9-like {ECO:0000313|RefSeq:XP_009779334.1};	Ubiquinol cytochrome c oxidoreductase, subunit QCR9	GO:0005750,mitochondrial respiratory chain complex III; GO:0006122,mitochondrial electron transport, ubiquinol to cytochrome c	PF05365.12:Ubiquinol-cytochrome C reductase, UQCRX/QCR9 like
g1057	6.09	11.32	1.2	7.58	9.72	9.42	8.71	10.55	3.21	6.83	7.68	8.43	5.15	2.62	3.885	137	358	43	189	297	231	206	237	71	177	193	210	135	71	103	LG1	6234977	6237834	+	--	--	PREDICTED: molybdate-anion transporter [Ipomoea nil]	--	SubName: Full=molybdate-anion transporter-like isoform X1 {ECO:0000313|RefSeq:XP_009780164.1};	Predicted sugar transporter	GO:0016021,integral component of membrane; GO:0015098,molybdate ion transmembrane transporter activity	PF05631.14:Sugar-tranasporters, 12 TM
g10604	6.18	5.72	5.29	3.1	6.43	6.03	12.59	22.11	9.17	2.04	8.87	7	25.9	17.17	21.535	63	82	86	35	89	67	135	225	92	24	101	79	308	211	260	LG3	8666338	8667267	+	--	--	--	--	--	--	--	--
g1061	2.5	5.05	3.51	4.08	5.98	3.49	5.51	6.35	3.26	5.06	2.05	2.2	8.11	4.96	6.535	84	239	188	152	273	128	195	213	108	196	77	82	318	201	260	LG1	6271747	6274155	+	--	--	PREDICTED: subtilisin-like protease SBT1.7 isoform X2 [Ipomoea nil]	RecName: Full=Subtilisin-like protease SBT1.7 {ECO:0000303|PubMed:16193095}; EC=3.4.21.- {ECO:0000305}; AltName: Full=Cucumisin-like serine protease; AltName: Full=Subtilase subfamily 1 member 7 {ECO:0000303|PubMed:16193095}; Short=AtSBT1.7 {ECO:0000303|PubMed:16193095}; AltName: Full=Subtilisin-like serine protease 1 {ECO:0000303|PubMed:12702015}; Short=At-SLP1 {ECO:0000303|PubMed:12702015}; Fla…	SubName: Full=subtilisin-like protease SBT1.7 {ECO:0000313|RefSeq:XP_016445807.1};	--	GO:0048046,apoplast; GO:0005618,cell wall; GO:0005576,extracellular region; GO:0009505,plant-type cell wall; GO:0004252,serine-type endopeptidase activity; GO:0080001,mucilage extrusion from seed coat; GO:0048359,mucilage metabolic process involved in seed coat development; GO:0010214,seed coat development	PF00082.22:Subtilase family
g10614	70.65	55.01	75.57	41.11	37.98	38.31	57.49	49.13	57.77	32.66	21.96	27.99	82.42	114.04	98.23	787	861	1341	507	574	465	673	546	633	419	273	345	1070	1530	1300	LG3	8739425	8740196	+	--	--	PREDICTED: uncharacterized protein LOC109192908 [Ipomoea nil]	--	SubName: Full=Uncharacterized protein {ECO:0000313|EMBL:BAT90401.1};	--	GO:0009269,response to desiccation	PF03168.13:Late embryogenesis abundant protein
g10615	2.64	1.47	1.07	0	0.36	0.2	4.47	3.79	4.67	0.45	0.95	0.59	1.42	1.42	1.42	97	76	63	0	18	8	173	139	169	19	39	24	61	63	62	LG3	8741375	8750664	+	K08857 NIMA (never in mitosis gene a)-related kinase 1/4/5 [EC:2.7.11.1] | (RefSeq) serine/threonine-protein kinase Nek6-like (A)	--	PREDICTED: uncharacterized protein LOC109160869 [Ipomoea nil]	--	SubName: Full=Uncharacterized protein {ECO:0000313|EMBL:KVH87632.1};	--	--	--
g1062	0	0	0	1.3	0.61	0.33	0	0	0	0	0.74	1.81	0	2.27	1.135	0	0	0	28	16	7	0	0	0	0	16	39	0	53	27	LG1	6281157	6282502	+	--	--	PREDICTED: uncharacterized protein LOC109188835 [Ipomoea nil]	--	SubName: Full=uncharacterized protein LOC107818322 {ECO:0000313|RefSeq:XP_016499800.1};	--	--	--
g10624	23.14	35.84	45.35	30.49	9.05	22.17	51.5	37.19	22.86	12.08	8.92	13.94	23.39	23.79	23.59	567	1234	1770	827	301	592	1326	909	551	341	244	378	668	702	685	LG3	8796658	8799680	-	K19891 glucan endo-1,3-beta-glucosidase 1/2/3 [EC:3.2.1.39] | (RefSeq) glucan endo-1,3-beta-glucosidase 3-like (A)	ko00500: Starch and sucrose metabolism	PREDICTED: glucan endo-1,3-beta-glucosidase 14-like isoform X1 [Ipomoea nil]	RecName: Full=Glucan endo-1,3-beta-glucosidase 14; EC=3.2.1.39; AltName: Full=(1->3)-beta-glucan endohydrolase 14; Short=(1->3)-beta-glucanase 14; AltName: Full=Beta-1,3-endoglucanase 14; Short=Beta-1,3-glucanase 14; Flags: Precursor;	SubName: Full=Glucan endo-1,3-beta-D-glucosidase {ECO:0000313|EMBL:PIN00098.1}; EC=3.2.1.39 {ECO:0000313|EMBL:PIN00098.1};	--	GO:0046658,anchored component of plasma membrane; GO:0005618,cell wall; GO:0005737,cytoplasm; GO:0005576,extracellular region; GO:0005634,nucleus; GO:0042973,glucan endo-1,3-beta-D-glucosidase activity; GO:0004553,hydrolase activity, hydrolyzing O-glycosyl compounds; GO:0030247,polysaccharide binding; GO:0005975,carbohydrate metabolic process; GO:0071555,cell wall organization; GO:0006952,defense…	PF00332.18:Glycosyl hydrolases family 17
g10625	18.26	18.67	18.16	31.78	12.08	21.2	39.71	23.43	28.58	51.08	51.66	46.04	21.43	19.33	20.38	204	293	323	393	183	258	466	261	314	657	644	569	279	260	270	LG3	8802040	8804420	-	K02639 ferredoxin | (RefSeq) ferredoxin-1-like (A)	ko00195: Photosynthesis	PREDICTED: ferredoxin, root R-B1-like [Nicotiana tomentosiformis]	RecName: Full=Ferredoxin-3, chloroplastic; AltName: Full=Ferredoxin III; Short=Fd III; Flags: Precursor;	RecName: Full=Ferredoxin {ECO:0000256|RuleBase:RU364001};	--	GO:0009507,chloroplast; GO:0009570,chloroplast stroma; GO:0009578,etioplast stroma; GO:0051537,2 iron, 2 sulfur cluster binding; GO:0009055,electron transfer activity; GO:0046872,metal ion binding; GO:0022900,electron transport chain	PF00111.27:2Fe-2S iron-sulfur cluster binding domain
g10627	13.33	11.04	0.37	2.62	1.27	2.99	1.18	1.01	9.21	11.93	14.49	4.71	1.12	1.48	1.3	225	262	10	49	29	55	21	17	153	232	273	88	22	30	26	LG3	8811435	8812830	+	--	--	PREDICTED: cytochrome b-c1 complex subunit 9-like [Malus domestica]	RecName: Full=Cytochrome b-c1 complex subunit 9; AltName: Full=Complex III subunit 9; AltName: Full=Complex III subunit X; AltName: Full=Ubiquinol-cytochrome c reductase complex 8.0 kDa protein;	SubName: Full=cytochrome b-c1 complex subunit 9-like {ECO:0000313|RefSeq:XP_009779334.1};	Ubiquinol cytochrome c oxidoreductase, subunit QCR9	GO:0005750,mitochondrial respiratory chain complex III; GO:0006122,mitochondrial electron transport, ubiquinol to cytochrome c	PF05365.12:Ubiquinol-cytochrome C reductase, UQCRX/QCR9 like
g10629	0.48	4.43	6.14	0.74	0.91	0.63	1.56	0	5.43	1.37	2.21	4.82	0	0.11	0.055	7	91	143	12	18	10	24	0	78	23	36	78	0	2	1	LG3	8820165	8821616	+	--	--	--	--	--	--	--	--
g10634	0	3.95	6.39	0.6	1.1	0.61	1.02	6.81	5.98	6.76	6.31	3.22	1.78	2.06	1.92	0	67	123	8	18	8	13	82	71	94	85	43	25	30	28	LG3	8850483	8851710	-	--	--	PREDICTED: uncharacterized protein LOC109157302 isoform X1 [Ipomoea nil]	--	SubName: Full=Uncharacterized protein {ECO:0000313|EMBL:KDP42436.1};	--	--	PF03004.14:Plant transposase (Ptta/En/Spm family)
g10636	5.54	2.69	4.93	4.28	5.32	5.2	7.42	4.78	4.14	4.89	4.08	3.45	3.17	1.59	2.38	174	119	247	149	227	178	245	150	128	177	143	120	116	60	88	LG3	8867664	8872015	-	K17085 transmembrane 9 superfamily member 1 | (RefSeq) transmembrane 9 superfamily member 5-like (A)	--	PREDICTED: transmembrane 9 superfamily member 5-like isoform X2 [Ipomoea nil]	RecName: Full=Transmembrane 9 superfamily member 5 {ECO:0000305}; AltName: Full=Endomembrane protein 11 {ECO:0000303|PubMed:22570441}; AltName: Full=Transmembrane nine protein 5 {ECO:0000303|PubMed:20681974}; Short=AtTMN5 {ECO:0000303|PubMed:20681974}; Flags: Precursor;	RecName: Full=Transmembrane 9 superfamily member {ECO:0000256|RuleBase:RU363079};	Endosomal membrane proteins, EMP70	GO:0010008,endosome membrane; GO:0000139,Golgi membrane; GO:0016021,integral component of membrane; GO:0009624,response to nematode	PF02990.16:Endomembrane protein 70
g10639	1.01	1.46	2.11	8.41	13.05	10.54	1.25	4.71	3.06	10.02	14.61	12.88	5.31	7.04	6.175	34	69	113	313	595	386	44	158	101	388	548	479	208	285	247	LG3	8891490	8898784	+	K14431 transcription factor TGA | (RefSeq) transcription factor TGA2.2-like (A)	ko04075: Plant hormone signal transduction	PREDICTED: transcription factor TGA2.2-like isoform X2 [Ipomoea nil]	RecName: Full=Transcription factor TGA9 {ECO:0000303|PubMed:20805327}; AltName: Full=Protein TGACG (TGA) motif-binding protein 9 {ECO:0000303|PubMed:20805327}; AltName: Full=bZIP transcription factor 21 {ECO:0000303|PubMed:11906833}; Short=AtbZIP21 {ECO:0000303|PubMed:11906833};	SubName: Full=Tgacg-sequence-specific dna-binding protein tga-2.1 {ECO:0000313|EMBL:OIT05628.1};	--	GO:0005634,nucleus; GO:0003700,DNA-binding transcription factor activity; GO:0042803,protein homodimerization activity; GO:0043565,sequence-specific DNA binding; GO:0048653,anther development; GO:0071588,hydrogen peroxide mediated signaling pathway; GO:0002237,response to molecule of bacterial origin; GO:0006351,transcription, DNA-templated	PF14144.6:Seed dormancy control
g1064	4.12	3.41	10.36	9.69	0.97	1.82	0	0	6.37	0	2.07	0	0	0	0	25	29	100	65	8	12	0	0	38	0	14	0	0	0	0	LG1	6296503	6296922	-	--	--	--	--	--	--	--	--
g10644	0	0.22	0	0.38	0	0	1.56	1.82	0	0	0	0.6	2.6	4.33	3.465	0	5	0	7	0	0	27	30	0	0	0	11	50	86	68	LG3	8922693	8926115	-	K10767 mRNA N6-methyladenine demethylase [EC:1.14.11.53] | (RefSeq) uncharacterized LOC109182604 (A)	--	PREDICTED: uncharacterized protein LOC109151883 [Ipomoea nil]	RecName: Full=60S ribosomal protein L37-3;	SubName: Full=uncharacterized protein LOC104246050 {ECO:0000313|RefSeq:XP_009800085.1};	FOG: Reverse transcriptase	GO:0022625,cytosolic large ribosomal subunit; GO:0046872,metal ion binding; GO:0003723,RNA binding; GO:0019843,rRNA binding; GO:0003735,structural constituent of ribosome; GO:0006412,translation	PF13456.6:Reverse transcriptase-like
g10649	0	0.04	0	0	0.04	0.05	1.21	0	1.65	1.48	0.11	1.01	0	0.15	0.075	0	2	0	0	2	2	43	0	55	58	4	38	0	6	3	LG3	8946370	8949190	+	K00430 peroxidase [EC:1.11.1.7] | (RefSeq) lignin-forming anionic peroxidase-like (A)	ko00940: Phenylpropanoid biosynthesis	hypothetical protein VITISV_006090 [Vitis vinifera]	RecName: Full=Uncharacterized mitochondrial protein AtMg00810; AltName: Full=ORF240b;	SubName: Full=Uncharacterized protein {ECO:0000313|EMBL:CAN63869.1};	FOG: Transposon-encoded proteins with TYA, reverse transcriptase, integrase domains in various combinations	GO:0005739,mitochondrion	--
g1065	32.34	54.41	28.68	36.22	21.77	29.8	24.23	19.24	25.95	62.83	68.8	40.85	100.53	99.94	100.235	475	1123	671	589	434	477	374	282	375	1063	1128	664	1721	1768	1745	LG1	6300627	6302918	+	--	--	PREDICTED: probable esterase KAI2 [Ipomoea nil]	RecName: Full=Probable esterase KAI2; AltName: Full=Protein DWARF-14-like; Short=Protein D14-like; AltName: Full=Protein HYPOSENSITIVE TO LIGHT; AltName: Full=Protein KARRIKIN INSENSITIVE 2;	SubName: Full=Uncharacterized protein {ECO:0000313|EnsemblPlants:PGSC0003DMT400064211};	--	GO:0005829,cytosol; GO:0005634,nucleus; GO:0016787,hydrolase activity; GO:0009704,de-etiolation; GO:0009640,photomorphogenesis; GO:0080167,response to karrikin	PF12697.7:Alpha/beta hydrolase family
g10658	0	0	0	0.3	0.61	0.22	0.13	0.24	0	0	0.27	0.09	0.14	0.27	0.205	0	0	0	22	56	16	9	16	0	0	20	7	11	22	17	LG3	9006810	9013114	+	K11294 nucleolin | (RefSeq) nucleolin-like (A)	--	PREDICTED: uncharacterized protein LOC109150807 [Ipomoea nil]	RecName: Full=Putative ribonuclease H protein At1g65750; EC=3.1.26.4;	SubName: Full=Uncharacterized protein {ECO:0000313|EMBL:CCA66009.1};	FOG: Reverse transcriptase	GO:0046872,metal ion binding; GO:0003676,nucleic acid binding; GO:0004523,RNA-DNA hybrid ribonuclease activity	PF13456.6:Reverse transcriptase-like
g10666	10.97	12.67	6.94	15.26	10.47	13.69	36.95	27.84	11.7	2.19	3.46	1.22	51.21	59.04	55.125	122	198	123	188	158	166	432	309	128	28	43	15	664	791	728	LG3	9059947	9060717	+	--	--	--	--	--	--	--	--
g10678	3.07	2.76	3.46	1.24	0.92	0.85	1.43	0.9	0.72	3.59	1.78	2.72	6.07	6.91	6.49	96	121	172	43	39	29	47	28	22	129	62	94	221	260	241	LG3	9173607	9181049	+	K17961 cytochrome P450 family 82 subfamily G polypeptide 1 [EC:1.14.-.-] | (RefSeq) cytochrome P450 82C4-like (A)	ko00904: Diterpenoid biosynthesis	PREDICTED: cytochrome P450 CYP82D47-like [Ipomoea nil]	RecName: Full=Cytochrome P450 82C4; EC=1.14.-.-;	SubName: Full=Uncharacterized protein {ECO:0000313|EMBL:PHU16355.1};	Cytochrome P450 CYP2 subfamily	GO:0016021,integral component of membrane; GO:0016020,membrane; GO:0020037,heme binding; GO:0005506,iron ion binding; GO:0004497,monooxygenase activity; GO:0016709,oxidoreductase activity, acting on paired donors, with incorporation or reduction of molecular oxygen, NAD(P)H as one donor, and incorporation of one atom of oxygen; GO:0071281,cellular response to iron ion; GO:0044550,secondary metabo…	PF00067.22:Cytochrome P450
g10684	0	0	0	4.42	5.38	6.01	2.43	5.13	4.05	2.16	2.29	3.88	0	0	0	0	0	0	65	97	87	34	68	53	33	34	57	0	0	0	LG3	9209707	9213253	+	--	--	--	--	--	--	--	--
g10686	0.77	0.81	1.78	0	0.09	0.22	0	0	0	0	0.4	0.73	0	0.74	0.37	19	28	70	0	3	6	0	0	0	0	11	20	0	22	11	LG3	9232697	9234407	+	K20769 fatty acid omega-hydroxylase [EC:1.14.-.-] | (RefSeq) cytochrome P450 94A2-like (A)	ko00073: Cutin, suberine and wax biosynthesis	PREDICTED: cytochrome P450 94A2-like [Ipomoea nil]	RecName: Full=Cytochrome P450 94A2; EC=1.14.-.-; AltName: Full=P450-dependent fatty acid omega-hydroxylase;	SubName: Full=Cytochrome P450-dependent fatty acid hydroxylase {ECO:0000313|EMBL:AAL54884.1};	Cytochrome P450 CYP4/CYP19/CYP26 subfamilies	GO:0005789,endoplasmic reticulum membrane; GO:0016021,integral component of membrane; GO:0020037,heme binding; GO:0005506,iron ion binding; GO:0004497,monooxygenase activity; GO:0016705,oxidoreductase activity, acting on paired donors, with incorporation or reduction of molecular oxygen	PF00067.22:Cytochrome P450
g1069	20.46	49.95	25.45	31.58	23.39	31.33	59.2	61.53	22.99	7.87	5.51	15	16.2	16.88	16.54	323	1108	640	552	501	539	982	969	357	143	97	262	298	321	310	LG1	6316527	6318972	+	--	--	--	--	--	--	--	--
g10697	0.97	2.12	0	1.57	1.64	0.85	5.08	5.56	5.66	3.21	3.39	3.48	3.6	3.98	3.79	43	132	0	77	99	41	237	246	247	164	168	171	186	213	200	LG3	9309400	9314889	+	K10798 poly [ADP-ribose] polymerase [EC:2.4.2.30] | (RefSeq) poly [ADP-ribose] polymerase 3 (A)	ko03410: Base excision repair	PREDICTED: poly [ADP-ribose]	RecName: Full=Poly [ADP-ribose] polymerase 3; Short=PARP-3; EC=2.4.2.30; AltName: Full=NAD(+) ADP-ribosyltransferase 3; Short=ADPRT-3; AltName: Full=Poly[ADP-ribose] synthase 3;	RecName: Full=Poly [ADP-ribose] polymerase {ECO:0000256|RuleBase:RU362114}; Short=PARP {ECO:0000256|RuleBase:RU362114}; EC=2.4.2.30 {ECO:0000256|RuleBase:RU362114};	NAD+ ADP-ribosyltransferase Parp, required for poly-ADP ribosylation of nuclear proteins	GO:0005737,cytoplasm; GO:0005634,nucleus; GO:0003677,DNA binding; GO:0003910,DNA ligase (ATP) activity; GO:0003950,NAD+ ADP-ribosyltransferase activity; GO:0051103,DNA ligation involved in DNA repair; GO:0006273,lagging strand elongation; GO:0006471,protein ADP-ribosylation	PF00644.20:Poly(ADP-ribose) polymerase catalytic domain
g107	0	0.03	0	2.02	1.51	1.65	0	0	0	0	0	0	0	0	0	0	1	0	46	42	37	0	0	0	0	0	0	0	0	0	LG1	640534	642049	+	--	--	PREDICTED: NAC domain-containing protein 37-like [Ipomoea nil]	RecName: Full=NAC domain-containing protein 100 {ECO:0000303|PubMed:15029955}; Short=ANAC100 {ECO:0000303|PubMed:15029955}; Short=AtNAC5;	SubName: Full=NAC domain-containing protein 100 {ECO:0000313|EMBL:KHN26260.1};	--	GO:0005634,nucleus; GO:0003677,DNA binding; GO:0003700,DNA-binding transcription factor activity; GO:0006351,transcription, DNA-templated	PF02365.15:No apical meristem (NAM) protein
g10711	2.8	5.68	3.41	5.25	14.71	5.97	6.39	5.29	4.58	7.24	9.07	10.41	7.19	4.35	5.77	148	422	287	307	1055	344	355	279	238	441	535	609	443	277	360	LG3	9403912	9410431	+	K11293 protein HIRA/HIR1 | (RefSeq) protein HIRA (A)	--	PREDICTED: protein HIRA isoform X1 [Ipomoea nil]	RecName: Full=Protein HIRA; AltName: Full=Histone regulator protein;	RecName: Full=Protein HIRA {ECO:0000256|RuleBase:RU364014};	Histone transcription regulator HIRA, WD repeat superfamily	GO:0000790,nuclear chromatin; GO:0031491,nucleosome binding; GO:0003714,transcription corepressor activity; GO:0016569,covalent chromatin modification; GO:0006336,DNA replication-independent nucleosome assembly; GO:0031935,regulation of chromatin silencing; GO:0006351,transcription, DNA-templated	PF07569.11:TUP1-like enhancer of split
g10719	6.13	9.66	5.38	0.37	0.42	0.22	2.4	2.08	1.94	0	0.69	1.06	1.85	0.4	1.125	151	334	211	10	14	6	62	51	47	0	19	29	53	12	33	LG3	9493832	9495537	+	K20624 12-hydroxyjasmonoyl-L-amino acid 12-hydroxylase / fatty acid hydroxylase [EC:1.14.14.49] | (RefSeq) cytochrome P450 94C1-like (A)	--	PREDICTED: cytochrome P450 94C1-like [Ipomoea nil]	RecName: Full=Cytochrome P450 94C1 {ECO:0000305}; EC=1.14.14.49 {ECO:0000269|PubMed:22215670, ECO:0000269|PubMed:26164240}; AltName: Full=12-hydroxyjasmonoyl-L-amino acid 12-hydroxylase {ECO:0000303|PubMed:22215670};	SubName: Full=Cytochrome p450 94c1 {ECO:0000313|EMBL:OIT22949.1};	Cytochrome P450 CYP4/CYP19/CYP26 subfamilies	GO:0005789,endoplasmic reticulum membrane; GO:0016021,integral component of membrane; GO:0043231,intracellular membrane-bounded organelle; GO:0018685,alkane 1-monooxygenase activity; GO:0020037,heme binding; GO:0005506,iron ion binding; GO:0009611,response to wounding	PF00067.22:Cytochrome P450
g10724	18.66	10.81	15.75	3.56	4.57	4.32	4.68	6.57	0	0	0.84	0.89	0.04	0.5	0.27	436	355	586	92	145	110	115	153	0	0	22	23	1	14	8	LG3	9539382	9541109	+	K20624 12-hydroxyjasmonoyl-L-amino acid 12-hydroxylase / fatty acid hydroxylase [EC:1.14.14.49] | (RefSeq) cytochrome P450 94C1-like (A)	--	PREDICTED: cytochrome P450 94C1-like [Ipomoea nil]	RecName: Full=Cytochrome P450 94C1 {ECO:0000305}; EC=1.14.14.49 {ECO:0000269|PubMed:22215670, ECO:0000269|PubMed:26164240}; AltName: Full=12-hydroxyjasmonoyl-L-amino acid 12-hydroxylase {ECO:0000303|PubMed:22215670};	SubName: Full=Uncharacterized protein {ECO:0000313|EMBL:CAN76753.1};	Cytochrome P450 CYP4/CYP19/CYP26 subfamilies	GO:0005789,endoplasmic reticulum membrane; GO:0016021,integral component of membrane; GO:0043231,intracellular membrane-bounded organelle; GO:0018685,alkane 1-monooxygenase activity; GO:0020037,heme binding; GO:0005506,iron ion binding; GO:0009611,response to wounding	PF00067.22:Cytochrome P450
g1073	2.68	0	0	0.78	2.42	0	6.75	4.6	2.37	5.71	6.51	2.11	0	0.29	0.145	31	0	0	10	38	0	82	53	27	76	84	27	0	4	2	LG1	6331143	6337572	-	--	--	LINE-type retrotransposon LIb DNA [Ipomoea batatas]	RecName: Full=Putative ribonuclease H protein At1g65750; EC=3.1.26.4;	SubName: Full=LINE-type retrotransposon LIb DNA {ECO:0000313|EMBL:AIK35195.1};	FOG: Reverse transcriptase	GO:0046872,metal ion binding; GO:0003676,nucleic acid binding; GO:0004523,RNA-DNA hybrid ribonuclease activity	PF13456.6:Reverse transcriptase-like
g10730	0.84	0	0	0	0.35	0	1	1.22	1.82	0	0	0	1.67	0.39	1.03	16	0	0	0	9	0	20	23	34	0	0	0	37	9	23	LG3	9576547	9578493	+	--	--	PREDICTED: uncharacterized protein LOC109172210 [Ipomoea nil]	RecName: Full=Retrovirus-related Pol polyprotein from transposon RE1; AltName: Full=Retro element 1 {ECO:0000303|PubMed:10689195}; Short=AtRE1 {ECO:0000303|PubMed:10689195}; Includes: RecName: Full=Protease RE1; EC=3.4.23.-; Includes: RecName: Full=Reverse transcriptase RE1; EC=2.7.7.49; Includes: RecName: Full=Endonuclease RE1;	SubName: Full=Retrovirus-related Pol polyprotein from transposon TNT 1-94 {ECO:0000313|EMBL:PKA60107.1}; EC=3.1.13.- {ECO:0000313|EMBL:PKA60107.1};	FOG: Transposon-encoded proteins with TYA, reverse transcriptase, integrase domains in various combinations	GO:0004190,aspartic-type endopeptidase activity; GO:0004519,endonuclease activity; GO:0046872,metal ion binding; GO:0003676,nucleic acid binding; GO:0003964,RNA-directed DNA polymerase activity; GO:0015074,DNA integration; GO:0006310,DNA recombination	--
g10738	0.07	0	0	0	0	0	3.08	2.56	0	0	0	0	0.18	0.67	0.425	3	0	0	0	0	0	141	111	0	0	0	0	9	35	22	LG3	9650197	9654533	+	K08857 NIMA (never in mitosis gene a)-related kinase 1/4/5 [EC:2.7.11.1] | (RefSeq) serine/threonine-protein kinase Nek6-like (A)	--	PREDICTED: uncharacterized protein LOC109150699 isoform X4 [Ipomoea nil]	--	SubName: Full=Uncharacterized protein {ECO:0000313|EMBL:KVI05140.1};	--	--	--
g1074	35.72	6.65	28.77	30.85	37.11	26.69	20.67	24.07	29.64	13.73	10.06	18.01	11.52	10.06	10.79	1120	293	1437	1071	1579	912	681	753	914	496	352	625	421	380	401	LG1	6342249	6344421	+	K23200 putative arabinosyltransferase [EC:2.4.2.-] | (RefSeq) probable arabinosyltransferase ARAD1 (A)	--	PREDICTED: xyloglucan galactosyltransferase XLT2-like [Ipomoea nil]	RecName: Full=Xyloglucan galactosyltransferase XLT2 {ECO:0000305}; EC=2.4.1.- {ECO:0000305}; AltName: Full=Glycosyltransferase 18 {ECO:0000303|PubMed:15020758}; Short=AtGT18 {ECO:0000303|PubMed:15020758}; AltName: Full=Protein XYLOGLUCAN L-SIDE CHAIN GALACTOSYLTRANSFERASE POSITION 2 {ECO:0000303|PubMed:22474179};	SubName: Full=xyloglucan galactosyltransferase XLT2-like {ECO:0000313|RefSeq:XP_016459366.1};	Acetylglucosaminyltransferase EXT1/exostosin 1	GO:0005794,Golgi apparatus; GO:0000139,Golgi membrane; GO:0016021,integral component of membrane; GO:0008378,galactosyltransferase activity; GO:0006486,protein glycosylation; GO:0009969,xyloglucan biosynthetic process	PF03016.15:Exostosin family
g10748	0.23	0	0.76	0.96	1.28	0.64	0.02	0	0	0	0.16	0	0.33	0.22	0.275	9	0	47	41	67	27	1	0	0	0	7	0	15	10	13	LG3	9721427	9725368	+	--	--	PREDICTED: uncharacterized protein At5g41620-like isoform X2 [Ipomoea nil]	RecName: Full=Uncharacterized protein At5g41620;	SubName: Full=trichohyalin-like isoform X1 {ECO:0000313|RefSeq:XP_009768750.1};	--	GO:0009507,chloroplast; GO:0005886,plasma membrane	--
g10754	0	0	0	0	0.56	0	0	0	0	0	0	0	1.63	2.59	2.11	0	0	0	0	10	0	0	0	0	0	0	0	25	41	33	LG3	9763583	9764900	-	--	--	--	--	--	--	--	--
g1076	11.88	7.68	6.97	12.77	15.52	11.78	6.99	10.12	7.22	2.41	2.8	2.19	1.75	3.59	2.67	338	307	316	402	599	365	209	287	202	79	89	69	58	123	91	LG1	6351529	6356067	+	K13260 isoflavone/4'-methoxyisoflavone 2'-hydroxylase [EC:1.14.14.90 1.14.14.89] | (RefSeq) cytochrome P450 81E8-like (A)	ko00943: Isoflavonoid biosynthesis	PREDICTED: cytochrome P450 81D11-like [Ipomoea nil]	RecName: Full=Cytochrome P450 81E8 {ECO:0000303|PubMed:14617078}; EC=1.14.13.- {ECO:0000305};	SubName: Full=Cytochrome P450 {ECO:0000313|EMBL:BAX34711.1};	Cytochrome P450 CYP2 subfamily	GO:0016021,integral component of membrane; GO:0020037,heme binding; GO:0005506,iron ion binding; GO:0004497,monooxygenase activity; GO:0016705,oxidoreductase activity, acting on paired donors, with incorporation or reduction of molecular oxygen	PF00067.22:Cytochrome P450
g10762	24.71	17.55	26.47	14.54	18.04	17.16	11.73	4.85	2.94	8.3	5.76	7.62	10.22	13.66	11.94	419	418	715	273	415	317	209	82	49	162	109	143	202	279	241	LG3	9836655	9839468	+	K09841 xanthoxin dehydrogenase [EC:1.1.1.288] | (RefSeq) xanthoxin dehydrogenase (A)	ko00906: Carotenoid biosynthesis	PREDICTED: zerumbone synthase-like isoform X1 [Ipomoea nil]	RecName: Full=Zerumbone synthase; EC=1.1.1.326;	SubName: Full=Uncharacterized protein {ECO:0000313|EMBL:CCB51625.1};	Reductases with broad range of substrate specificities	GO:0102069,zerumbone synthase activity	PF13561.6:Enoyl-(Acyl carrier protein) reductase
g10765	2.48	0.99	1.62	0.75	0.15	0	0	0	1.05	0	0	0	0	0	0	48	27	50	16	4	0	0	0	20	0	0	0	0	0	0	LG3	9861625	9863065	+	K09841 xanthoxin dehydrogenase [EC:1.1.1.288] | (RefSeq) xanthoxin dehydrogenase (A)	ko00906: Carotenoid biosynthesis	PREDICTED: zerumbone synthase-like isoform X1 [Ipomoea nil]	RecName: Full=Secoisolariciresinol dehydrogenase; EC=1.1.1.331; Flags: Fragment;	SubName: Full=Uncharacterized protein {ECO:0000313|EMBL:AFK46966.1};	Reductases with broad range of substrate specificities	GO:0016491,oxidoreductase activity	PF13561.6:Enoyl-(Acyl carrier protein) reductase
g10766	0	0	0	2.2	2.19	2.82	0	0.85	1.62	0	0	0	0.32	0	0.16	0	0	0	46	56	58	0	16	30	0	0	0	7	0	4	LG3	9868265	9870401	+	--	--	--	--	--	--	--	--
g1077	4.07	0.86	0	0.67	3.18	2.79	0	1.85	1.44	0.77	0.03	0.03	0.82	0.38	0.6	115	34	0	21	122	86	0	52	40	25	1	1	27	13	20	LG1	6356839	6360417	+	K13260 isoflavone/4'-methoxyisoflavone 2'-hydroxylase [EC:1.14.14.90 1.14.14.89] | (RefSeq) cytochrome P450 81E8-like (A)	ko00943: Isoflavonoid biosynthesis	PREDICTED: cytochrome P450 81D11-like [Ipomoea nil]	RecName: Full=Cytochrome P450 81E8 {ECO:0000303|PubMed:14617078}; EC=1.14.13.- {ECO:0000305};	SubName: Full=Cytochrome P450 CYP2 subfamily {ECO:0000313|EMBL:PIN17129.1};	Cytochrome P450 CYP2 subfamily	GO:0016021,integral component of membrane; GO:0020037,heme binding; GO:0005506,iron ion binding; GO:0004497,monooxygenase activity; GO:0016705,oxidoreductase activity, acting on paired donors, with incorporation or reduction of molecular oxygen	PF00067.22:Cytochrome P450
g10770	0	2.19	0	5.3	2.13	1.28	9.13	0	0	0	0	0	3.68	2.47	3.075	0	33	0	63	31	15	103	0	0	0	0	0	46	32	39	LG3	9888145	9890239	+	K09841 xanthoxin dehydrogenase [EC:1.1.1.288] | (RefSeq) xanthoxin dehydrogenase (A)	ko00906: Carotenoid biosynthesis	PREDICTED: zerumbone synthase-like isoform X2 [Ipomoea nil]	RecName: Full=Zerumbone synthase; EC=1.1.1.326;	SubName: Full=Uncharacterized protein {ECO:0000313|EMBL:AFK46966.1};	Reductases with broad range of substrate specificities	GO:0102069,zerumbone synthase activity	PF13561.6:Enoyl-(Acyl carrier protein) reductase
g10773	11.05	13.97	14.37	11.41	9.52	16.14	17.49	26.4	27.86	0.83	3.89	3.97	6.68	5.15	5.915	196	348	406	224	229	312	326	467	486	17	77	78	138	110	124	LG3	9910305	9911723	+	K09841 xanthoxin dehydrogenase [EC:1.1.1.288] | (RefSeq) xanthoxin dehydrogenase (A)	ko00906: Carotenoid biosynthesis	PREDICTED: secoisolariciresinol dehydrogenase-like [Ipomoea nil]	RecName: Full=Zerumbone synthase; EC=1.1.1.326;	SubName: Full=Uncharacterized protein {ECO:0000313|EMBL:CCB51625.1};	Reductases with broad range of substrate specificities	GO:0102069,zerumbone synthase activity	PF13561.6:Enoyl-(Acyl carrier protein) reductase
g10774	14.48	14.44	10.23	14.06	6.52	11.84	9.11	9.05	12.75	14.41	10.75	9.42	7.69	5.43	6.56	239	335	269	257	146	213	158	149	207	274	198	172	148	108	128	LG3	9918035	9920619	+	--	--	PREDICTED: uncharacterized protein LOC109159695 [Ipomoea nil]	--	SubName: Full=uncharacterized protein LOC107847974 {ECO:0000313|RefSeq:XP_016548086.1, ECO:0000313|RefSeq:XP_016548087.1};	--	--	PF02472.16:Biopolymer transport protein ExbD/TolR
g10775	8.04	10.02	6.33	3.72	2.27	1.58	6.05	5.89	9.55	5.31	8.92	3.97	3.4	6.84	5.12	201	352	252	103	77	43	159	147	235	153	249	110	99	206	153	LG3	9921135	9926189	+	--	--	PREDICTED: uncharacterized protein LOC109153162 isoform X1 [Ipomoea nil]	--	SubName: Full=Uncharacterized protein {ECO:0000313|EnsemblPlants:Solyc04g049580.2.1};	--	--	PF14226.6:non-haem dioxygenase in morphine synthesis N-terminal
g10784	0.65	4.62	0	0	0	0	0	2.08	18.87	2.37	1.51	3.05	0	0	0	5	50	0	0	0	0	0	16	143	21	13	26	0	0	0	LG3	10003215	10011111	+	--	--	--	--	--	--	--	--
g10794	3.83	0	4.85	0	0.05	0	0	0	0	0	0	0	0	0	0	52	0	105	0	1	0	0	0	0	0	0	0	0	0	0	LG3	10099807	10104850	-	K09841 xanthoxin dehydrogenase [EC:1.1.1.288] | (RefSeq) xanthoxin dehydrogenase (A)	ko00906: Carotenoid biosynthesis	hypothetical protein BVRB_9g223930 [Beta vulgaris subsp. vulgaris]	RecName: Full=Secoisolariciresinol dehydrogenase; EC=1.1.1.331; Flags: Fragment;	SubName: Full=Alcohol dehydroge family protein {ECO:0000313|EMBL:ERP62577.1};	Reductases with broad range of substrate specificities	GO:0016491,oxidoreductase activity	PF13561.6:Enoyl-(Acyl carrier protein) reductase
g10795	0	0	0	0	0.06	0	1.95	0	3.78	0	0	0	0.72	0.06	0.39	0	0	0	0	1	0	27	0	49	0	0	0	11	1	6	LG3	10109449	10110362	-	--	--	--	--	--	--	--	--
g1080	8.14	0	2.27	1.53	0.75	0.93	0	0	0	0.74	1.72	3.93	0.49	0.89	0.69	144	0	64	30	18	18	0	0	0	15	34	77	10	19	15	LG1	6381449	6383677	+	K10436 microtubule-associated protein, RP/EB family | (RefSeq) microtubule-associated protein RP/EB family member 1C-like (A)	--	PREDICTED: microtubule-associated protein RP/EB family member 1C-like [Ipomoea nil]	RecName: Full=Microtubule-associated protein RP/EB family member 1C; AltName: Full=APC-binding protein EB1C; AltName: Full=End-binding protein 1C; Short=AtEB1C; AltName: Full=Protein ATEB1 homolog 1; Short=AtEB1H1;	SubName: Full=Microtubule-associated protein rpeb family member 1c {ECO:0000313|EMBL:OIT27071.1};	Microtubule-binding protein involved in cell cycle control	GO:0005618,cell wall; GO:0005874,microtubule; GO:0005730,nucleolus; GO:0005634,nucleus; GO:0009524,phragmoplast; GO:0005819,spindle; GO:0008017,microtubule binding; GO:0007049,cell cycle; GO:0051301,cell division; GO:0030865,cortical cytoskeleton organization; GO:0009652,thigmotropism	PF03271.17:EB1-like C-terminal motif
g10809	0.22	0.15	0.08	1.8	0.42	1.21	0	0.11	0	0.07	1.21	0.19	0.12	0.27	0.195	8	8	5	74	21	49	0	4	0	3	50	8	5	12	9	LG3	10199743	10204412	-	--	--	PREDICTED: methyl-CpG-binding domain-containing protein 5-like [Ipomoea nil]	RecName: Full=Methyl-CpG-binding domain-containing protein 6; Short=AtMBD6; Short=MBD06; AltName: Full=Methyl-CpG-binding protein MBD6;	SubName: Full=Uncharacterized protein {ECO:0000313|EMBL:OIT00872.1};	Methyl-CpG binding transcription regulators	GO:0005720,nuclear heterochromatin; GO:0005731,nucleolus organizer region; GO:0005634,nucleus; GO:0010370,perinucleolar chromocenter; GO:0019899,enzyme binding; GO:0008327,methyl-CpG binding; GO:0043621,protein self-association; GO:0006355,regulation of transcription, DNA-templated; GO:0006351,transcription, DNA-templated	PF01429.19:Methyl-CpG binding domain
g10819	14.06	5.29	3.07	3.69	4.46	3.86	6.8	11.26	8.73	8.9	10.74	12.96	7.56	7.84	7.7	244	129	85	71	105	73	124	195	149	178	208	249	153	164	159	LG3	10250607	10253255	+	K13035 beta-cyano-L-alanine hydratase/nitrilase [EC:3.5.5.4 4.2.1.65] | (RefSeq) bifunctional nitrilase/nitrile hydratase NIT4A (A)	ko00460: Cyanoamino acid metabolism	PREDICTED: bifunctional nitrilase/nitrile hydratase NIT4A [Ipomoea nil]	RecName: Full=Bifunctional nitrilase/nitrile hydratase NIT4A; Short=TNIT4A; EC=3.5.5.1; EC=3.5.5.4; EC=4.2.1.65; AltName: Full=3-cyanoalanine hydratase; AltName: Full=Cyanoalanine nitrilase A; AltName: Full=Nitrilase 4A;	SubName: Full=Uncharacterized protein {ECO:0000313|EMBL:CDP06876.1};	Carbon-nitrogen hydrolase	GO:0005886,plasma membrane; GO:0047558,3-cyanoalanine hydratase activity; GO:0047427,cyanoalanine nitrilase activity; GO:0006807,nitrogen compound metabolic process	PF00795.22:Carbon-nitrogen hydrolase
g10820	0	0	0.03	1.06	2.02	1.08	0	0.53	1.74	0.44	0	0	1.49	1.93	1.71	0	0	2	44	103	44	0	20	64	19	0	0	65	87	76	LG3	10257293	10261232	-	--	--	PREDICTED: uncharacterized protein At5g41620-like isoform X3 [Ipomoea nil]	RecName: Full=Uncharacterized protein At5g41620;	SubName: Full=trichohyalin-like isoform X1 {ECO:0000313|RefSeq:XP_009768750.1};	--	GO:0009507,chloroplast; GO:0005886,plasma membrane	PF09636.10:XkdW protein
g10825	5.1	5.28	1.91	7.24	3.42	7.04	18.26	16.28	12.31	11.24	9.37	12.58	16.9	11.77	14.335	121	176	72	190	110	182	455	385	287	307	248	330	467	336	402	LG3	10316371	10321134	-	K15255 ATP-dependent DNA helicase PIF1 [EC:3.6.4.12] | (RefSeq) ATP-dependent DNA helicase pif1-like (A)	--	PREDICTED: uncharacterized protein LOC109189728 [Ipomoea nil]	--	RecName: Full=ATP-dependent DNA helicase {ECO:0000256|RuleBase:RU363044}; EC=3.6.4.12 {ECO:0000256|RuleBase:RU363044}; Flags: Fragment;	DNA helicase PIF1/RRM3	GO:0005524,ATP binding; GO:0003678,DNA helicase activity; GO:0006310,DNA recombination; GO:0006281,DNA repair; GO:0000723,telomere maintenance	PF05970.14:PIF1-like helicase
g1083	8.55	5.83	6.77	0	1.77	0.98	33.4	13.22	12.77	4.87	4.47	2.01	1.91	9.02	5.465	96	92	121	0	27	12	394	148	141	63	56	25	25	122	74	LG1	6398559	6401446	+	--	--	--	--	--	--	--	--
g10833	0	0	0	0	0.87	0.95	0.07	1.77	0	1.34	0	5.26	0	0	0	0	0	0	0	16	14	1	24	0	21	0	79	0	0	0	LG3	10438105	10440804	-	--	--	PREDICTED: uncharacterized protein LOC109184430 [Ipomoea nil]	RecName: Full=Protein TPR1 {ECO:0000303|PubMed:24336200}; AltName: Full=Aberrant spikelet and panicle1-related 2 {ECO:0000303|PubMed:22136599}; AltName: Full=Protein ASP1-RELATED 2 {ECO:0000303|PubMed:22136599}; Short=OsASPR2 {ECO:0000303|PubMed:22136599}; AltName: Full=Topless-related protein 1 {ECO:0000303|PubMed:24336200}; AltName: Full=Topless-related protein 2 {ECO:0000303|PubMed:26601214}; …	SubName: Full=Trehalose-6-phosphate synthase14 {ECO:0000313|EMBL:AQK89606.1};	WD40 repeat-containing protein	GO:0006355,regulation of transcription, DNA-templated	--
g10837	0.76	2.53	0.31	0.36	2.03	1.02	2.46	0	7.37	1.08	0.92	4.54	0.11	0.48	0.295	17	80	11	9	62	25	58	0	163	28	23	113	3	13	8	LG3	10472530	10475879	+	--	--	PREDICTED: uncharacterized protein LOC109160134 [Ipomoea nil]	--	SubName: Full=uncharacterized protein LOC107774960 {ECO:0000313|RefSeq:XP_016450139.1};	--	GO:0008080,N-acetyltransferase activity	--
g10838	2.11	3.34	5.97	1.47	1.86	2.98	9.74	5.79	0	5.02	13	8.98	9.4	6.4	7.9	35	78	158	27	42	54	170	96	0	96	241	165	182	128	155	LG3	10476840	10483365	+	--	--	PREDICTED: uncharacterized protein LOC109160134 [Ipomoea nil]	--	SubName: Full=Peptide alpha-N-acetyltransferase {ECO:0000313|EMBL:PIN16918.1};	--	GO:0016740,transferase activity	PF00583.25:Acetyltransferase (GNAT) family
g10841	1.22	0	0.03	0.04	0.59	0.17	1.21	0.05	1.29	0.04	0	0.21	0	0	0	26	0	1	1	17	4	27	1	27	1	0	5	0	0	0	LG3	10504560	10507049	+	--	--	PREDICTED: zinc finger CCHC domain-containing protein 7 isoform X2 [Ipomoea nil]	--	SubName: Full=Uncharacterized protein {ECO:0000313|EMBL:PHT62029.1};	--	--	--
g1086	2.1	1.52	0.02	0	0.55	0.65	0	0	0	0	0	0	0.35	0.5	0.425	56	57	1	0	20	19	0	0	0	0	0	0	11	16	14	LG1	6420903	6424674	-	K14505 cyclin D3, plant | (RefSeq) cyclin-D3-1-like (A)	ko04075: Plant hormone signal transduction	cyclin D3 [Ipomoea batatas]	RecName: Full=Cyclin-D3-2; AltName: Full=G1/S-specific cyclin-D3-2; Short=CycD3;2;	SubName: Full=Cyclin D3 {ECO:0000313|EMBL:BAH15073.1};	G1/S-specific cyclin D	GO:0005634,nucleus; GO:0007049,cell cycle; GO:0051301,cell division; GO:0010444,guard mother cell differentiation; GO:0048316,seed development	PF00134.23:Cyclin, N-terminal domain
g10860	0	0	0	0	0	0	0.45	0	1.94	0.43	0.08	0	0.2	0.86	0.53	0	0	0	0	0	0	20	0	81	21	4	0	10	44	27	LG3	10661224	10668320	+	--	--	PREDICTED: uncharacterized protein LOC109174842 [Ipomoea nil]	--	SubName: Full=Retrovirus-related Pol polyprotein from transposon TNT 1-94 {ECO:0000313|EMBL:KYP77867.1}; EC=2.7.7.6 {ECO:0000313|EMBL:KYP77867.1};	FOG: Transposon-encoded proteins with TYA, reverse transcriptase, integrase domains in various combinations	GO:0003899,DNA-directed 5'-3' RNA polymerase activity	--
g10863	0	1.48	0	0.2	1.12	0.26	1.98	0	1.2	0.88	0.25	0.61	0	0	0	0	37	0	4	27	5	37	0	21	18	5	12	0	0	0	LG3	10721474	10722789	-	--	--	PREDICTED: protein FAF-like, chloroplastic [Ipomoea nil]	RecName: Full=Protein FAF-like, chloroplastic; Flags: Precursor;	SubName: Full=Protein faf-like, chloroplastic {ECO:0000313|EMBL:OIT03798.1};	--	GO:0009507,chloroplast	--
g10865	0	0.15	0	0	0	0	0	0	0	0.16	0.34	0.39	0.07	0.21	0.14	0	13	0	0	0	0	0	0	0	11	23	26	5	15	10	LG3	10742014	10754064	+	--	--	zinc finger BED domain-containing protein RICESLEEPER 2-like [Asparagus officinalis]	RecName: Full=Putative AC transposase; AltName: Full=ORFA;	SubName: Full=zinc finger BED domain-containing protein RICESLEEPER 2-like {ECO:0000313|RefSeq:XP_009773687.1};	Tam3-transposase (Ac family)	GO:0003677,DNA binding; GO:0046983,protein dimerization activity; GO:0006310,DNA recombination; GO:0032196,transposition	PF05699.14:hAT family C-terminal dimerisation region
g10876	29.7	10.7	29.84	14.51	10.46	18.68	14.58	7.58	3.32	3	5.69	2.19	39.11	40.56	39.835	318	161	509	172	152	218	164	81	35	37	68	26	488	523	506	LG3	10811583	10812324	+	--	--	PREDICTED: uncharacterized protein LOC109159955 [Ipomoea nil]	--	SubName: Full=uncharacterized protein LOC107797047 {ECO:0000313|RefSeq:XP_016475377.1};	--	--	--
g10877	3.73	4.27	2.23	0	0.95	1.4	1.63	2.82	1.43	6.43	9.71	2.49	7.25	3.2	5.225	61	98	58	0	21	25	28	46	23	121	177	45	138	63	101	LG3	10814413	10818466	+	K17600 vacuolar protein sorting-associated protein 54 | (RefSeq) vacuolar protein sorting-associated protein 54, chloroplastic (A)	--	PREDICTED: vacuolar protein sorting-associated protein 54, chloroplastic-like isoform X1 [Daucus carota subsp. sativus]	RecName: Full=Vacuolar protein sorting-associated protein 54, chloroplastic; Short=AtVPS54; Flags: Precursor;	SubName: Full=Uncharacterized protein {ECO:0000313|EMBL:KZN11655.1};	--	GO:0009507,chloroplast; GO:0005829,cytosol; GO:0000938,GARP complex; GO:0000139,Golgi membrane; GO:0019905,syntaxin binding; GO:0006896,Golgi to vacuole transport; GO:0015031,protein transport; GO:0042147,retrograde transport, endosome to Golgi	PF07928.12:Vps54-like protein
g10889	0	1.59	2.94	1.43	0.73	0	1.45	0	2.92	0	0	0	0	0	0	0	38	80	27	17	0	26	0	49	0	0	0	0	0	0	LG3	10886007	10890348	-	K07375 tubulin beta | (RefSeq) tubulin beta-5 chain (A)	ko04145: Phagosome	hypothetical protein AALP_AA4G115600 [Arabis alpina]	RecName: Full=Tubulin beta-5 chain; AltName: Full=Beta-5-tubulin;	RecName: Full=Tubulin beta chain {ECO:0000256|RuleBase:RU000352};	Beta tubulin	GO:0005737,cytoplasm; GO:0005874,microtubule; GO:0005525,GTP binding; GO:0003924,GTPase activity; GO:0005200,structural constituent of cytoskeleton; GO:0016049,cell growth; GO:0007017,microtubule-based process; GO:0009723,response to ethylene; GO:0090378,seed trichome elongation	PF03953.17:Tubulin C-terminal domain
g1089	2.62	1.42	1.37	0.29	0.28	0	0	0.59	0	0.97	0.61	0.85	0.38	0.64	0.51	89	68	74	11	13	0	0	20	0	38	23	32	15	26	21	LG1	6440385	6445944	-	K01110 phosphatidylinositol-3,4,5-trisphosphate 3-phosphatase and dual-specificity protein phosphatase PTEN [EC:3.1.3.16 3.1.3.48 3.1.3.67] | (RefSeq) phosphatidylinositol 3,4,5-trisphosphate 3-phosphatase and protein-tyrosine-phosphatase PTEN2A-like (A)	ko00562: Inositol phosphate metabolism; ko04070: Phosphatidylinositol signaling system	PREDICTED: phosphatidylinositol 3,4,5-trisphosphate 3-phosphatase and protein-tyrosine-phosphatase PTEN2A-like [Ipomoea nil]	RecName: Full=Phosphatidylinositol 3,4,5-trisphosphate 3-phosphatase and protein-tyrosine-phosphatase PTEN2A {ECO:0000305}; EC=3.1.3.48 {ECO:0000255|PROSITE-ProRule:PRU10044, ECO:0000269|PubMed:21864294}; EC=3.1.3.67 {ECO:0000269|PubMed:21864294}; AltName: Full=Protein PHOSPHATASE AND TENSIN HOMOLOG 2-a {ECO:0000303|PubMed:21864294}; Short=AtPTEN2 {ECO:0000303|PubMed:12368500}; Short=AtPTEN2a {EC…	SubName: Full=Uncharacterized protein {ECO:0000313|EMBL:CDP02533.1};	Clathrin coat dissociation kinase GAK/PTEN/Auxilin and related tyrosine phosphatases	GO:0005829,cytosol; GO:0070300,phosphatidic acid binding; GO:0052866,phosphatidylinositol phosphate phosphatase activity; GO:0016314,phosphatidylinositol-3,4,5-trisphosphate 3-phosphatase activity; GO:0004725,protein tyrosine phosphatase activity; GO:0008138,protein tyrosine/serine/threonine phosphatase activity; GO:0035335,peptidyl-tyrosine dephosphorylation; GO:0046856,phosphatidylinositol deph…	PF13350.6:Tyrosine phosphatase family
g10891	0.99	0.74	0	2.71	1.67	5.7	0	0	0	0.64	0.4	2.54	2.96	4.38	3.67	20	21	0	61	46	126	0	0	0	15	9	57	70	107	89	LG3	10894233	10897166	+	--	--	PREDICTED: protein STRICTOSIDINE SYNTHASE-LIKE 3-like [Ipomoea nil]	RecName: Full=Protein STRICTOSIDINE SYNTHASE-LIKE 3 {ECO:0000303|PubMed:10777701}; Short=AtSSL3 {ECO:0000303|PubMed:10777701}; AltName: Full=Strictosidine synthase 9 {ECO:0000303|PubMed:19121120}; Short=AtSS9 {ECO:0000303|PubMed:19121120}; Flags: Precursor;	SubName: Full=Protein strictosidine synthase-like 3 {ECO:0000313|EMBL:OIT19505.1};	Predicted alkaloid synthase/Surface mucin Hemomucin	GO:0005783,endoplasmic reticulum; GO:0005774,vacuolar membrane; GO:0016788,hydrolase activity, acting on ester bonds; GO:0009058,biosynthetic process	PF03088.16:Strictosidine synthase
g10893	1.35	1.26	0.59	1.22	0.61	2.01	0	0.1	0.32	10.41	13.54	16.95	0.54	0.17	0.355	13	17	9	13	8	21	0	1	3	115	145	180	6	2	4	LG3	10907264	10907928	-	K02940 large subunit ribosomal protein L9e | (RefSeq) 60S ribosomal protein L9-like (A)	ko03010: Ribosome	PREDICTED: 60S ribosomal protein L9-like [Ipomoea nil]	RecName: Full=60S ribosomal protein L9;	SubName: Full=Uncharacterized protein {ECO:0000313|EMBL:KGN49915.1};	60S ribosomal protein L9	GO:0022625,cytosolic large ribosomal subunit; GO:0003723,RNA binding; GO:0019843,rRNA binding; GO:0003735,structural constituent of ribosome; GO:0002181,cytoplasmic translation	PF00347.23:Ribosomal protein L6
g10895	1.01	0.72	0	3.79	0.31	1.69	0.4	1.85	0.68	7.58	6.39	10.69	0.36	0.14	0.25	12	12	0	50	5	22	5	22	8	104	85	141	5	2	4	LG3	10912124	10916848	-	K10767 mRNA N6-methyladenine demethylase [EC:1.14.11.53] | (RefSeq) uncharacterized LOC109182604 (A)	--	PREDICTED: uncharacterized protein LOC109152888 [Ipomoea nil]	--	--	--	--	--
g10896	12.91	19.28	9.54	22.43	21.81	23.58	40.41	13.15	36.75	75.12	73.51	52.07	9.67	33.86	21.765	315	661	371	606	722	627	1036	320	882	2111	2002	1406	275	995	635	LG3	10917023	10919899	+	K07466 replication factor A1 | (RefSeq) replication protein A 70 kDa DNA-binding subunit B-like (A)	ko03030: DNA replication; ko03420: Nucleotide excision repair; ko03430: Mismatch repair; ko03440: Homologous recombination	putative transposase [Ipomoea tricolor]	RecName: Full=Replication protein A 70 kDa DNA-binding subunit B; Short=AtRPA70B; AltName: Full=AtRPA1-5; AltName: Full=Replication factor A protein 1B; AltName: Full=Replication protein A 1B; Short=AtRPA1B;	SubName: Full=Putative transposase {ECO:0000313|EMBL:BAF64710.1};	Single-stranded DNA-binding replication protein A (RPA), large (70 kD) subunit and related ssDNA-binding proteins	GO:0005634,nucleus; GO:0003677,DNA binding; GO:0046872,metal ion binding; GO:0006310,DNA recombination; GO:0006281,DNA repair; GO:0006260,DNA replication; GO:0010224,response to UV-B	PF16900.5:Replication protein A OB domain
g10898	1.73	1.3	0	4.47	0.89	1.27	4.29	0	0	0	0	0	3.65	1.66	2.655	20	21	0	57	14	16	52	0	0	0	0	0	49	23	36	LG3	10959183	10959981	+	--	--	--	--	--	--	--	--
g10902	2.46	2.15	4.31	3.34	4.39	5.18	6.61	3.57	1.81	11.03	7.97	6.2	4.24	3.98	4.11	87	107	243	131	211	200	246	126	63	450	315	243	175	170	173	LG3	10971923	10978548	-	--	--	PREDICTED: protein IQ-DOMAIN 1-like isoform X2 [Ipomoea nil]	RecName: Full=Protein IQ-DOMAIN 1 {ECO:0000303|PubMed:15960618};	SubName: Full=protein IQ-DOMAIN 1-like {ECO:0000313|RefSeq:XP_016438476.1};	--	GO:0005737,cytoplasm; GO:0005874,microtubule; GO:0005634,nucleus; GO:0005516,calmodulin binding; GO:0008017,microtubule binding	PF00612.27:IQ calmodulin-binding motif
g10904	7.36	8.41	11.85	51.23	37.28	57.73	17.38	13.07	6.29	73.43	73.5	59.83	80.31	92.76	86.535	145	233	372	1118	997	1240	360	257	122	1667	1617	1305	1845	2202	2024	LG3	10997158	10999985	+	K09503 DnaJ homolog subfamily A member 2 | (RefSeq) dnaJ protein homolog (A)	ko04141: Protein processing in endoplasmic reticulum	PREDICTED: dnaJ protein homolog [Ipomoea nil]	RecName: Full=DnaJ protein homolog; AltName: Full=DNAJ-1; Flags: Precursor;	SubName: Full=Dnaj protein-like protein {ECO:0000313|EMBL:OIT26647.1};	Molecular chaperone (DnaJ superfamily)	GO:0005886,plasma membrane; GO:0005524,ATP binding; GO:0031072,heat shock protein binding; GO:0046872,metal ion binding; GO:0051082,unfolded protein binding; GO:0006457,protein folding; GO:0009408,response to heat	PF01556.18:DnaJ C terminal domain
g10905	2.94	5.56	9.2	5.7	4.69	4.13	3.6	2.47	1.4	4.17	11.57	11.45	4.95	6.43	5.69	49	130	244	105	106	75	63	41	23	80	215	211	96	129	113	LG3	11000001	11002733	-	K13430 serine/threonine-protein kinase PBS1 [EC:2.7.11.1] | (RefSeq) serine/threonine-protein kinase PBS1 (A)	ko04626: Plant-pathogen interaction	PREDICTED: probable receptor-like protein kinase At1g49730 isoform X1 [Ipomoea nil]	RecName: Full=Probable receptor-like protein kinase At1g49730; EC=2.7.11.1; Flags: Precursor;	SubName: Full=probable receptor-like protein kinase At1g49730 {ECO:0000313|RefSeq:XP_009789004.1};	Serine/threonine protein kinase	GO:0016021,integral component of membrane; GO:0005886,plasma membrane; GO:0005524,ATP binding; GO:0004674,protein serine/threonine kinase activity	PF07714.17:Protein tyrosine kinase
g10910	2.98	3.13	2.49	0.53	0.72	0.14	3.99	2.87	5.74	3.64	6.54	1.1	0.57	0.68	0.625	76	112	101	15	25	4	107	73	144	107	186	31	17	21	19	LG3	11029528	11033850	+	K03327 multidrug resistance protein, MATE family | (RefSeq) protein DETOXIFICATION 29-like (A)	--	PREDICTED: uncharacterized protein LOC109164732 [Ipomoea nil]	RecName: Full=Dynamin-2A; EC=3.6.5.5; AltName: Full=Dynamin-like protein 6; AltName: Full=Dynamin-related protein 2A;	SubName: Full=lipase-like isoform X2 {ECO:0000313|RefSeq:XP_009763394.1};	Predicted lipase	GO:0030136,clathrin-coated vesicle; GO:0005829,cytosol; GO:0005794,Golgi apparatus; GO:0000139,Golgi membrane; GO:0016020,membrane; GO:0005874,microtubule; GO:0009524,phragmoplast; GO:0005886,plasma membrane; GO:0009506,plasmodesma; GO:0005774,vacuolar membrane; GO:0005525,GTP binding; GO:0003924,GTPase activity; GO:0008289,lipid binding; GO:0008017,microtubule binding; GO:0006896,Golgi to vacuol…	PF13456.6:Reverse transcriptase-like
g10915	1.15	1.12	7.58	0.16	5.95	3.12	5.08	6.57	0	1.42	1.09	1.7	6.82	6.65	6.735	19	26	199	3	133	56	88	108	0	27	20	31	131	132	132	LG3	11063838	11065270	+	--	--	PREDICTED: serrate RNA effector molecule-like [Ipomoea nil]	--	--	--	--	--
g10921	1.25	0.69	1.83	3.46	1.03	2.04	0.07	0	0	0.54	0.06	2.2	0	0	0	18	14	42	55	20	32	1	0	0	9	1	35	0	0	0	LG3	11090397	11091533	-	--	--	--	--	--	--	--	--
g10922	0.75	0.08	1.04	0.1	0.36	0.08	0.57	0.09	1.37	1.9	1.26	1.39	0.64	0.51	0.575	49	7	108	7	32	6	39	6	88	143	92	100	49	40	45	LG3	11102857	11113943	-	K15255 ATP-dependent DNA helicase PIF1 [EC:3.6.4.12] | (RefSeq) ATP-dependent DNA helicase pif1-like (A)	--	PREDICTED: uncharacterized protein LOC109170955 [Ipomoea nil]	RecName: Full=Vacuolar protein sorting-associated protein 54, chloroplastic; Short=AtVPS54; Flags: Precursor;	RecName: Full=ATP-dependent DNA helicase {ECO:0000256|RuleBase:RU363044}; EC=3.6.4.12 {ECO:0000256|RuleBase:RU363044};	DNA helicase PIF1/RRM3	GO:0009507,chloroplast; GO:0005829,cytosol; GO:0000938,GARP complex; GO:0000139,Golgi membrane; GO:0019905,syntaxin binding; GO:0006896,Golgi to vacuole transport; GO:0015031,protein transport; GO:0042147,retrograde transport, endosome to Golgi	PF05970.14:PIF1-like helicase
g10924	16.43	12.52	24.34	36.78	21.92	26.22	19.27	16.47	0	8.11	9.42	11.4	25.12	36.53	30.825	211	226	498	523	382	367	260	211	0	120	135	162	376	565	471	LG3	11120392	11123873	-	--	--	PREDICTED: uncharacterized protein LOC109159955 [Ipomoea nil]	--	SubName: Full=uncharacterized protein LOC107797047 {ECO:0000313|RefSeq:XP_016475377.1};	--	--	--
g1093	213.59	101.11	166.31	31.22	32.02	33.41	58.4	47.47	37.24	31.18	37.38	15.19	58.17	71.45	64.81	3825	2544	4744	619	778	652	1099	848	656	643	747	301	1214	1541	1378	LG1	6463769	6465487	+	K13425 WRKY transcription factor 22 | (RefSeq) WRKY transcription factor 22-like (A)	ko04016: MAPK signaling pathway - plant; ko04626: Plant-pathogen interaction	PREDICTED: probable WRKY transcription factor 7 isoform X2 [Ipomoea nil]	RecName: Full=Probable WRKY transcription factor 15; AltName: Full=WRKY DNA-binding protein 15;	SubName: Full=Uncharacterized protein {ECO:0000313|EnsemblPlants:PGSC0003DMT400064256};	--	GO:0005634,nucleus; GO:0005516,calmodulin binding; GO:0003700,DNA-binding transcription factor activity; GO:0043565,sequence-specific DNA binding; GO:0044212,transcription regulatory region DNA binding; GO:0010200,response to chitin; GO:0006351,transcription, DNA-templated	PF03106.15:WRKY DNA -binding domain
g10931	1.16	0	0	0.91	0.51	0	0	2.48	4.95	3.49	3.19	6.92	0	1.61	0.805	15	0	0	13	9	0	0	32	63	52	46	99	0	25	13	LG3	11179048	11182310	-	--	--	--	--	--	--	--	--
g10936	1.33	1.57	2.23	0.97	0.42	0.57	1.26	2.8	1.11	1.87	1.82	2.55	0.94	1.6	1.27	94	155	250	76	40	44	93	197	77	152	143	199	77	136	107	LG3	11200871	11210770	-	K11294 nucleolin | (RefSeq) nucleolin-like (A)	--	PREDICTED: uncharacterized protein LOC109160819 [Ipomoea nil]	RecName: Full=Uncharacterized mitochondrial protein AtMg00310; AltName: Full=ORF154;	SubName: Full=Uncharacterized protein {ECO:0000313|EMBL:CCA66044.1};	FOG: Reverse transcriptase	GO:0005739,mitochondrion	PF00078.27:Reverse transcriptase (RNA-dependent DNA polymerase)
g10941	3.91	5.36	3.25	5.87	20.18	8.23	10.17	12.4	7.72	4.1	5.97	7.9	11.27	7.75	9.51	139	268	184	231	974	319	380	440	270	168	237	311	467	332	400	LG3	11243727	11251910	-	--	--	PREDICTED: serrate RNA effector molecule-like [Ipomoea nil]	RecName: Full=Serrate RNA effector molecule;	SubName: Full=Serrate RNA effector molecule {ECO:0000313|EMBL:PHT59300.1};	C2H2 Zn-finger protein	GO:0009507,chloroplast; GO:0005829,cytosol; GO:0005846,nuclear cap binding complex; GO:0010445,nuclear dicing body; GO:0016607,nuclear speck; GO:0005730,nucleolus; GO:0005634,nucleus; GO:0003677,DNA binding; GO:0003700,DNA-binding transcription factor activity; GO:0046872,metal ion binding; GO:0006397,mRNA processing; GO:0031053,primary miRNA processing; GO:0010267,production of ta-siRNAs involve…	PF12066.8:Domain of unknown function (DUF3546)
g10952	0	1.95	0	0	0	0	6	8.7	13.41	0	2.02	0	0	0	0	0	23	0	0	0	0	53	73	111	0	19	0	0	0	0	LG3	11302278	11302860	-	--	--	--	--	--	--	--	--
g10953	6.64	9.83	4.59	0	0.05	0	17.41	7.32	12.27	0.23	0	0	3.68	1.61	2.645	99	206	109	0	1	0	273	109	180	4	0	0	64	29	47	LG3	11303705	11305592	+	--	--	PREDICTED: uncharacterized protein LOC109153604 [Ipomoea nil]	--	SubName: Full=Uncharacterized protein {ECO:0000313|EMBL:EMJ14443.1};	--	GO:0008234,cysteine-type peptidase activity	PF02902.19:Ulp1 protease family, C-terminal catalytic domain
g1096	123.1	153.72	167.72	64.76	42.17	54.18	161.62	195.38	97.11	28.31	34.31	40.89	129.78	151.33	140.555	1080	1895	2344	629	502	518	1490	1710	838	286	336	397	1327	1599	1463	LG1	6495439	6496046	+	K09286 EREBP-like factor | (RefSeq) ethylene-responsive transcription factor RAP2-9-like (A)	--	PREDICTED: ethylene-responsive transcription factor RAP2-9-like [Ipomoea nil]	RecName: Full=Ethylene-responsive transcription factor ERF008;	SubName: Full=Uncharacterized protein {ECO:0000313|EnsemblPlants:PGSC0003DMT400010228};	--	GO:0005634,nucleus; GO:0003677,DNA binding; GO:0003700,DNA-binding transcription factor activity; GO:0009873,ethylene-activated signaling pathway; GO:0006351,transcription, DNA-templated	PF00847.20:AP2 domain
g10962	0	0	0	0.36	0.15	0.48	0.38	0.23	0	0	0.27	0.02	0.45	0.81	0.63	0	0	0	16	8	21	16	9	0	0	12	1	21	39	30	LG3	11368156	11377399	+	--	--	putative retrotransposon protein [Phyllostachys edulis]	RecName: Full=Uncharacterized mitochondrial protein AtMg00860; AltName: Full=ORF158;	SubName: Full=Putative retrotransposon protein {ECO:0000313|EMBL:ADB85273.1};	FOG: Transposon-encoded proteins with TYA, reverse transcriptase, integrase domains in various combinations	GO:0005739,mitochondrion	PF17921.1:Integrase zinc binding domain
g10966	11.84	19.55	11.78	20.47	20.2	26	29.47	15.59	22.7	15.8	17.33	9.04	10.76	9.83	10.295	536	1244	850	1026	1241	1283	1402	704	1011	824	876	453	568	536	552	LG3	11401401	11419161	-	K06171 nicastrin | (RefSeq) nicastrin (A)	--	PREDICTED: nicastrin isoform X2 [Ipomoea nil]	RecName: Full=Nicastrin; Flags: Precursor;	SubName: Full=Uncharacterized protein {ECO:0000313|EnsemblPlants:PGSC0003DMT400034643};	Transmembrane glycoprotein nicastrin	GO:0005887,integral component of plasma membrane; GO:0004175,endopeptidase activity; GO:0007219,Notch signaling pathway; GO:0016485,protein processing	PF05450.15:Nicastrin
g10977	2.09	0.56	1.91	0	0.66	1.03	0	0	0	4.21	3.94	1.94	0.73	0.37	0.55	37	14	54	0	16	20	0	0	0	86	78	38	15	8	12	LG3	11487070	11489007	-	K20240 spermidine dicoumaroyl transferase [EC:2.3.1.249] | (RefSeq) spermidine coumaroyl-CoA acyltransferase-like (A)	--	PREDICTED: taxadien-5-alpha-ol O-acetyltransferase [Ipomoea nil]	RecName: Full=Protein ECERIFERUM 26-like; Short=CER26-like; AltName: Full=CER2-like protein 2; Short=CER2-like2;	SubName: Full=uncharacterized protein LOC107822629 {ECO:0000313|RefSeq:XP_016504660.1};	--	GO:0009535,chloroplast thylakoid membrane; GO:0016747,transferase activity, transferring acyl groups other than amino-acyl groups; GO:0071555,cell wall organization; GO:0009555,pollen development; GO:0042761,very long-chain fatty acid biosynthetic process	PF02458.15:Transferase family
g1098	1.17	2.68	1.21	3.14	3.99	2.77	3.77	5.19	6.24	3.12	2.48	4.8	1.68	2.03	1.855	94	303	155	280	436	243	319	417	494	289	223	428	158	197	178	LG1	6509826	6519671	+	--	--	PREDICTED: filament-like plant protein 7 isoform X1 [Ipomoea nil]	RecName: Full=Filament-like plant protein 7; Short=AtFPP7;	SubName: Full=filament-like plant protein 7 isoform X2 {ECO:0000313|RefSeq:XP_016561043.1};	--	--	PF05911.11:Filament-like plant protein, long coiled-coil
g1099	1.1	1.22	1.4	0.59	2.18	0.88	0.37	0.85	2.62	0.18	1.53	1.81	0.36	0.59	0.475	57	89	116	34	154	50	20	44	134	11	89	104	22	37	30	LG1	6519956	6531316	+	K17413 small subunit ribosomal protein S35 | (RefSeq) uncharacterized LOC109188018 (A)	--	hypothetical protein VITISV_001206 [Vitis vinifera]	RecName: Full=Histone-lysine N-methyltransferase EZ1; EC=2.1.1.43; AltName: Full=Enhancer of zeste protein 1;	SubName: Full=Uncharacterized protein {ECO:0000313|EMBL:CAN63534.1};	FOG: Transposon-encoded proteins with TYA, reverse transcriptase, integrase domains in various combinations	GO:0031519,PcG protein complex; GO:0018024,histone-lysine N-methyltransferase activity; GO:0006355,regulation of transcription, DNA-templated; GO:0006351,transcription, DNA-templated	PF07727.14:Reverse transcriptase (RNA-dependent DNA polymerase)
g10993	0.02	0.09	0	0.81	0.25	0	4.49	1.5	1.07	0	0.1	0	0	0.09	0.045	1	6	0	42	16	0	220	70	49	0	5	0	0	5	3	LG3	11600872	11608222	+	K17604 zinc finger SWIM domain-containing protein 3 | (RefSeq) uncharacterized LOC109165518 (A)	--	PREDICTED: uncharacterized protein LOC109165835 [Ipomoea nil]	--	SubName: Full=uncharacterized protein LOC107802797 {ECO:0000313|RefSeq:XP_016481854.1};	--	GO:0008270,zinc ion binding	PF03108.15:MuDR family transposase
g10995	0.45	0.27	0	1.82	6.22	2.26	0.89	7.91	4.38	0.81	1.59	1.54	1.49	2.8	2.145	13	11	0	58	243	71	27	227	124	27	51	49	50	97	74	LG3	11610758	11614037	-	K17710 pentatricopeptide repeat domain-containing protein 1 | (RefSeq) putative pentatricopeptide repeat-containing protein At2g02150 (A)	--	PREDICTED: putative pentatricopeptide repeat-containing protein At1g09680 isoform X1 [Ipomoea nil]	RecName: Full=Putative pentatricopeptide repeat-containing protein At1g09680;	SubName: Full=putative pentatricopeptide repeat-containing protein At1g09680 {ECO:0000313|RefSeq:XP_018816551.1};	FOG: PPR repeat	GO:0043231,intracellular membrane-bounded organelle; GO:0005739,mitochondrion; GO:0004519,endonuclease activity; GO:0003723,RNA binding; GO:0009451,RNA modification	PF13041.6:PPR repeat family
g10997	71.3	57.28	74.7	24.44	32.86	17.86	39.61	43.52	44.98	8.63	5.5	2.25	112.53	175.09	143.81	1033	1166	1724	392	646	282	603	629	641	144	89	36	1900	3055	2478	LG3	11622677	11627627	-	--	--	PREDICTED: protein YLS9 [Ipomoea nil]	RecName: Full=NDR1/HIN1-like protein 13 {ECO:0000303|PubMed:26206852};	SubName: Full=Ndr1hin1-like protein 3 {ECO:0000313|EMBL:OIT21777.1};	--	GO:0016021,integral component of membrane; GO:0005886,plasma membrane; GO:0009506,plasmodesma; GO:0042742,defense response to bacterium	PF03168.13:Late embryogenesis abundant protein
g11	6.27	4.06	11.72	2.54	1.51	0.97	0.07	1.48	1.36	1.22	0.57	0.06	1.93	1.46	1.695	89	81	265	40	29	15	1	21	19	20	9	1	32	25	29	LG1	62096	64786	+	--	--	PREDICTED: methylesterase 3-like [Ipomoea nil]	RecName: Full=Methylesterase 3; Short=AtMES3; EC=3.1.1.-;	SubName: Full=Methyl jasmonate esterase {ECO:0000313|EMBL:AAV87151.1};	--	GO:0016788,hydrolase activity, acting on ester bonds; GO:0080030,methyl indole-3-acetate esterase activity; GO:0080032,methyl jasmonate esterase activity	PF12697.7:Alpha/beta hydrolase family
g1100	1057.55	77.37	778.73	36.57	16.64	16.44	63.36	85.56	61.42	39.51	55.74	36.2	9.1	27.91	18.505	14757	1517	17309	565	315	250	929	1191	843	635	868	559	148	469	309	LG1	6532704	6534161	-	K00588 caffeoyl-CoA O-methyltransferase [EC:2.1.1.104] | (RefSeq) caffeoyl-CoA O-methyltransferase (A)	ko00940: Phenylpropanoid biosynthesis; ko00941: Flavonoid biosynthesis; ko00945: Stilbenoid, diarylheptanoid and gingerol biosynthesis	PREDICTED: caffeoyl-CoA O-methyltransferase [Ipomoea nil]	RecName: Full=Caffeoyl-CoA O-methyltransferase; EC=2.1.1.104; AltName: Full=Trans-caffeoyl-CoA 3-O-methyltransferase; Short=CCoAMT; Short=CCoAOMT;	SubName: Full=Caffeoyl-CoA O-methyltransferase {ECO:0000313|EMBL:PHT27515.1};	O-methyltransferase	GO:0042409,caffeoyl-CoA O-methyltransferase activity; GO:0046872,metal ion binding; GO:0009809,lignin biosynthetic process	PF01596.17:O-methyltransferase
g1101	0.43	0.27	0	0.48	1.06	0.67	0	0.74	0	0.63	1.61	1.02	0	0.16	0.08	31	28	0	39	105	53	0	54	0	53	131	82	0	14	7	LG1	6536879	6547291	-	K02320 DNA polymerase alpha subunit A [EC:2.7.7.7] | (RefSeq) DNA polymerase alpha catalytic subunit (A)	ko03030: DNA replication	PREDICTED: DNA polymerase alpha catalytic subunit isoform X1 [Ipomoea nil]	RecName: Full=DNA polymerase alpha catalytic subunit; EC=2.7.7.7;	RecName: Full=DNA polymerase {ECO:0000256|RuleBase:RU000442}; EC=2.7.7.7 {ECO:0000256|RuleBase:RU000442};	DNA polymerase alpha, catalytic subunit	GO:0005658,alpha DNA polymerase:primase complex; GO:0005634,nucleus; GO:0008408,3'-5' exonuclease activity; GO:0051539,4 iron, 4 sulfur cluster binding; GO:0003677,DNA binding; GO:0003896,DNA primase activity; GO:0003887,DNA-directed DNA polymerase activity; GO:0046872,metal ion binding; GO:0001882,nucleoside binding; GO:0000166,nucleotide binding; GO:0006270,DNA replication initiation; GO:000630…	PF00136.21:DNA polymerase family B
g11012	1.37	0.34	0	0.5	1.21	0	0	0	0	0.65	0	0	1.06	1.59	1.325	20	7	0	8	24	0	0	0	0	11	0	0	18	28	23	LG3	11704959	11707699	+	K13993 HSP20 family protein | (RefSeq) 22.0 kDa class IV heat shock protein-like (A)	ko04141: Protein processing in endoplasmic reticulum	PREDICTED: inactive protein RESTRICTED TEV MOVEMENT 2-like [Ipomoea nil]	RecName: Full=Inactive protein RESTRICTED TEV MOVEMENT 2; AltName: Full=Inactive restricted tobacco etch virus movement protein 2;	SubName: Full=Uncharacterized protein {ECO:0000313|EMBL:EYU46130.1};	Molecular chaperone (small heat-shock protein Hsp26/Hsp42)	GO:0016021,integral component of membrane; GO:0005886,plasma membrane; GO:0006952,defense response	PF00011.21:Hsp20/alpha crystallin family
g11018	6.39	11.08	5.66	2.78	1.77	2.9	6.05	2.44	6.15	1.95	3.61	3.06	6.79	3.92	5.355	168	409	237	81	63	83	167	64	159	59	106	89	208	124	166	LG3	11747049	11751264	+	--	--	PREDICTED: uncharacterized protein LOC109183675 [Ipomoea nil]	--	SubName: Full=Uncharacterized protein {ECO:0000313|EMBL:AEV42258.1};	--	GO:0004190,aspartic-type endopeptidase activity; GO:0003676,nucleic acid binding; GO:0008270,zinc ion binding; GO:0015074,DNA integration	PF03732.17:Retrotransposon gag protein
g11024	1.04	0.98	0	0.39	0.38	1.22	3.39	7.14	4.44	0.08	0	0.13	0.37	1.1	0.735	22	29	0	9	11	28	75	150	92	2	0	3	9	28	19	LG3	11789139	11791611	+	--	--	--	--	--	--	--	--
g11027	2.27	5.27	2.28	2.11	1.64	1.19	3.29	1.9	4.45	5.03	4.4	3.15	4.87	4.16	4.515	140	457	224	144	137	80	213	117	270	357	303	215	350	309	330	LG3	11800149	11810103	+	--	--	putative reverse transcriptase domain-containing protein [Helianthus annuus]	RecName: Full=RNA-directed DNA polymerase homolog; EC=2.7.7.48; AltName: Full=Reverse transcriptase homolog;	SubName: Full=Putative reverse transcriptase domain-containing protein {ECO:0000313|EMBL:OTG16517.1};	FOG: Transposon-encoded proteins with TYA, reverse transcriptase, integrase domains in various combinations	GO:0005739,mitochondrion; GO:0003968,RNA-directed 5'-3' RNA polymerase activity; GO:0003964,RNA-directed DNA polymerase activity	PF17917.1:RNase H-like domain found in reverse transcriptase
g1103	1.06	2.99	3.28	2.75	4.7	4.34	16.66	4.65	8.62	10.76	8.57	6.97	1.66	1.83	1.745	38	150	187	109	228	169	626	166	303	443	342	276	69	79	74	LG1	6556136	6564914	+	K09838 zeaxanthin epoxidase [EC:1.14.15.21] | (RefSeq) ZEP1; zeaxanthin epoxidase, chloroplastic (A)	ko00906: Carotenoid biosynthesis	zeaxanthin epoxidase, partial [Ipomoea batatas]	RecName: Full=Zeaxanthin epoxidase, chloroplastic; EC=1.14.15.21; Flags: Precursor;	SubName: Full=Zeaxanthin epoxidase {ECO:0000313|EMBL:AIR95905.1}; Flags: Fragment;	Kynurenine 3-monooxygenase and related flavoprotein monooxygenases	GO:0031969,chloroplast membrane; GO:0009535,chloroplast thylakoid membrane; GO:0071949,FAD binding; GO:0009540,zeaxanthin epoxidase [overall] activity; GO:0009688,abscisic acid biosynthetic process	PF01494.19:FAD binding domain
g11038	1.29	2.88	2.16	4.47	2.45	3.82	0.86	2.43	4.18	2.59	5.45	6.16	0.72	1.5	1.11	23	72	61	88	59	74	16	43	73	53	108	121	15	32	24	LG3	11893717	11895720	+	--	--	PREDICTED: uncharacterized protein LOC109160134 [Ipomoea nil]	--	SubName: Full=Uncharacterized protein {ECO:0000313|EMBL:CDP09663.1};	--	GO:0008080,N-acetyltransferase activity	PF00583.25:Acetyltransferase (GNAT) family
g11039	33.24	44.05	24.27	19.01	10.98	16.07	14.78	23.71	32.95	77.64	64.71	56.97	47.84	70.44	59.14	319	594	371	202	143	168	149	227	311	858	693	605	535	814	675	LG3	11898381	11899572	-	--	--	--	--	--	--	--	--
g1104	43.41	10.54	25.49	9.62	15.98	10.83	4.27	7.66	4.32	1.74	2.61	1.6	12.95	11.98	12.465	909	310	850	223	454	247	94	160	89	42	61	37	316	302	309	LG1	6567041	6568491	-	K20716 mitogen-activated protein kinase kinase kinase 17/18 | (RefSeq) mitogen-activated protein kinase kinase kinase A-like (A)	ko04016: MAPK signaling pathway - plant	PREDICTED: mitogen-activated protein kinase kinase kinase NPK1-like isoform X1 [Ipomoea nil]	RecName: Full=Mitogen-activated protein kinase kinase kinase 17 {ECO:0000303|PubMed:25720833}; EC=2.7.11.25 {ECO:0000250|UniProtKB:Q9ZVP5, ECO:0000255|PROSITE-ProRule:PRU00159};	SubName: Full=mitogen-activated protein kinase kinase kinase NPK1-like {ECO:0000313|RefSeq:XP_016459427.1};	MEKK and related serine/threonine protein kinases	GO:0005737,cytoplasm; GO:0005634,nucleus; GO:0005524,ATP binding; GO:0004709,MAP kinase kinase kinase activity; GO:0004674,protein serine/threonine kinase activity; GO:0004702,NA; GO:0009738,abscisic acid-activated signaling pathway; GO:0032147,activation of protein kinase activity; GO:0007346,regulation of mitotic cell cycle; GO:0009737,response to abscisic acid; GO:0006970,response to osmotic s…	PF00069.25:Protein kinase domain
g11040	48.4	87.93	49.16	60.29	47.28	71.86	132.81	112.37	144.78	120.78	116.52	137.08	79.33	85.53	82.43	968	2471	1566	1335	1283	1566	2791	2242	2848	2782	2601	3034	1849	2060	1955	LG3	11905217	11908270	+	K07199 5'-AMP-activated protein kinase, regulatory beta subunit | (RefSeq) SNF1-related protein kinase regulatory subunit beta-1 (A)	--	PREDICTED: SNF1-related protein kinase regulatory subunit beta-1 isoform X1 [Ipomoea nil]	RecName: Full=SNF1-related protein kinase regulatory subunit beta-1; Short=AKIN subunit beta-1; Short=AKINB1; Short=AKINbeta1;	SubName: Full=Uncharacterized protein {ECO:0000313|EnsemblPlants:PGSC0003DMT400011861};	Protein involved in Snf1 protein kinase complex assembly	GO:0005524,ATP binding; GO:0005975,carbohydrate metabolic process; GO:0006633,fatty acid biosynthetic process; GO:0042128,nitrate assimilation	PF16561.5:Glycogen recognition site of AMP-activated protein kinase
g11045	4.95	10.46	11.15	16.95	23.47	20.57	15.35	11.9	8.87	36.31	30.38	25.97	13.45	17.27	15.36	242	719	869	918	1558	1097	789	581	427	2046	1659	1406	767	1018	893	LG3	11985817	11994185	+	K11593 eukaryotic translation initiation factor 2C | (RefSeq) protein argonaute 4-like (A)	--	PREDICTED: protein argonaute 4-like [Ipomoea nil]	RecName: Full=Protein argonaute 4; AltName: Full=Protein OVEREXPRESSOR OF CATIONIC PEROXIDASE 11;	SubName: Full=Uncharacterized protein {ECO:0000313|EnsemblPlants:PGSC0003DMT400069460};	Translation initiation factor 2C (eIF-2C) and related proteins	GO:0015030,Cajal body; GO:0030529,NA; GO:0005719,nuclear euchromatin; GO:0005730,nucleolus; GO:0005654,nucleoplasm; GO:0003682,chromatin binding; GO:0004521,endoribonuclease activity; GO:0035198,miRNA binding; GO:0035197,siRNA binding; GO:0006342,chromatin silencing; GO:0031048,chromatin silencing by small RNA; GO:0009816,defense response to bacterium, incompatible interaction; GO:0051607,defense…	PF02171.17:Piwi domain
g11051	0	0	0	0	0	0	0.84	0.15	0.54	0	0	0	0.05	0.44	0.245	0	0	0	0	0	0	30	5	18	0	0	0	2	18	10	LG3	12050122	12054529	-	--	--	PREDICTED: zinc finger BED domain-containing protein RICESLEEPER 2-like [Ipomoea nil]	RecName: Full=Zinc finger BED domain-containing protein RICESLEEPER 2; AltName: Full=Transposase-like protein RICESLEEPER 2;	SubName: Full=zinc finger BED domain-containing protein RICESLEEPER 2-like {ECO:0000313|RefSeq:XP_009767703.1};	Tam3-transposase (Ac family)	GO:0005634,nucleus; GO:0003700,DNA-binding transcription factor activity; GO:0046872,metal ion binding; GO:0046983,protein dimerization activity; GO:0000977,RNA polymerase II regulatory region sequence-specific DNA binding; GO:0009791,post-embryonic development; GO:0006357,regulation of transcription by RNA polymerase II; GO:0006351,transcription, DNA-templated	--
g11058	0	0	0.18	0.39	5.91	5.52	0	3.3	0	0	0	0	0	0	0	0	0	2	3	56	42	0	23	0	0	0	0	0	0	0	LG3	12086236	12086719	-	--	--	--	--	--	--	--	--
g1106	15.8	25.34	17.77	73.41	86.24	77.53	29.76	33.57	21.33	38.59	49.31	42.67	59	64.6	61.8	619	1395	1109	3184	4584	3310	1225	1312	822	1741	2156	1850	2694	3048	2871	LG1	6581296	6587355	+	K09838 zeaxanthin epoxidase [EC:1.14.15.21] | (RefSeq) ZEP1; zeaxanthin epoxidase, chloroplastic (A)	ko00906: Carotenoid biosynthesis	zeaxanthin epoxidase [Ipomoea nil]	RecName: Full=Zeaxanthin epoxidase, chloroplastic; EC=1.14.15.21; Flags: Precursor;	RecName: Full=Zeaxanthin epoxidase, chloroplastic {ECO:0000256|PIRNR:PIRNR036989}; EC=1.14.15.21 {ECO:0000256|PIRNR:PIRNR036989};	Kynurenine 3-monooxygenase and related flavoprotein monooxygenases	GO:0031969,chloroplast membrane; GO:0009535,chloroplast thylakoid membrane; GO:0071949,FAD binding; GO:0009540,zeaxanthin epoxidase [overall] activity; GO:0009688,abscisic acid biosynthetic process	PF01494.19:FAD binding domain
g11062	1.38	3.92	8.91	5.9	6.46	7.73	0	0	0	0	7.63	5.44	1.77	1.29	1.53	16	64	165	76	102	98	0	0	0	0	99	70	24	18	21	LG3	12096434	12098708	+	--	--	--	--	--	--	--	--
g11067	0	0	0	0	0	0	1.81	0	2.84	0.95	0.19	1.05	0	0	0	0	0	0	0	0	0	54	0	79	31	6	33	0	0	0	LG3	12125714	12127928	+	K15397 3-ketoacyl-CoA synthase [EC:2.3.1.199] | (RefSeq) uncharacterized LOC109185251 (A)	ko00062: Fatty acid elongation; ko04626: Plant-pathogen interaction	PREDICTED: uncharacterized protein LOC109157818 [Ipomoea nil]	RecName: Full=Retrovirus-related Pol polyprotein from transposon RE2; AltName: Full=Retro element 2 {ECO:0000303|PubMed:10689195}; Short=AtRE2 {ECO:0000303|PubMed:10689195}; Includes: RecName: Full=Protease RE2; EC=3.4.23.-; Includes: RecName: Full=Reverse transcriptase RE2; EC=2.7.7.49; Includes: RecName: Full=Endonuclease RE2;	SubName: Full=Retrovirus-related Pol polyprotein from transposon TNT 1-94 {ECO:0000313|EMBL:PKA63792.1};	FOG: Transposon-encoded proteins with TYA, reverse transcriptase, integrase domains in various combinations	GO:0004190,aspartic-type endopeptidase activity; GO:0004519,endonuclease activity; GO:0046872,metal ion binding; GO:0003676,nucleic acid binding; GO:0003964,RNA-directed DNA polymerase activity; GO:0015074,DNA integration; GO:0006310,DNA recombination	PF07727.14:Reverse transcriptase (RNA-dependent DNA polymerase)
g11068	4.33	3.79	2.47	11.86	7.27	11.68	19.34	11.02	8.33	11.17	8.6	11.8	9.26	10.18	9.72	65	80	59	197	148	191	305	165	123	193	144	196	162	184	173	LG3	12140187	12141749	-	K14432 ABA responsive element binding factor | (RefSeq) ABSCISIC ACID-INSENSITIVE 5-like protein 2 (A)	ko04075: Plant hormone signal transduction	PREDICTED: ABSCISIC ACID-INSENSITIVE 5-like protein 2 [Ipomoea nil]	RecName: Full=ABSCISIC ACID-INSENSITIVE 5-like protein 2; AltName: Full=ABA-responsive element-binding protein 3; AltName: Full=Dc3 promoter-binding factor 3; Short=AtDPBF3; AltName: Full=bZIP transcription factor 66; Short=AtbZIP66;	SubName: Full=BZIP transcription factor family protein 3 {ECO:0000313|EMBL:AGD98701.1};	--	GO:0005634,nucleus; GO:0003700,DNA-binding transcription factor activity; GO:0043565,sequence-specific DNA binding; GO:0009738,abscisic acid-activated signaling pathway; GO:0009737,response to abscisic acid; GO:0006351,transcription, DNA-templated	--
g11069	0	0	0	0	0.45	0.06	1.82	2.91	1.7	1.16	1.72	0	0.06	0.82	0.44	0	0	0	0	18	2	56	85	49	39	56	0	2	29	16	LG3	12152480	12158719	-	K01228 mannosyl-oligosaccharide glucosidase [EC:3.2.1.106] | (RefSeq) mannosyl-oligosaccharide glucosidase GCS1 (A)	ko00510: N-Glycan biosynthesis; ko04141: Protein processing in endoplasmic reticulum	PREDICTED: methyl-CpG-binding domain-containing protein 9-like [Ipomoea nil]	RecName: Full=Methyl-CpG-binding domain-containing protein 9; Short=AtMBD9; Short=MBD09; EC=2.3.1.48; AltName: Full=Histone acetyl transferase MBD9; AltName: Full=Methyl-CpG-binding protein MBD9;	SubName: Full=LOW QUALITY PROTEIN: methyl-CpG-binding domain-containing protein 9-like {ECO:0000313|RefSeq:XP_016441705.1};	--	GO:0005720,nuclear heterochromatin; GO:0005634,nucleus; GO:0009506,plasmodesma; GO:0004402,histone acetyltransferase activity; GO:0042393,histone binding; GO:0046872,metal ion binding; GO:0008327,methyl-CpG binding; GO:0061630,ubiquitin protein ligase activity; GO:0016573,histone acetylation; GO:0043966,histone H3 acetylation; GO:0043967,histone H4 acetylation; GO:0010216,maintenance of DNA methy…	--
g1107	0.19	0	0	0.27	1.13	1.13	0	0	0	0	0.5	0.54	0.58	0.9	0.74	5	0	0	8	41	33	0	0	0	0	15	16	18	29	24	LG1	6593087	6595711	-	--	--	PREDICTED: uncharacterized protein LOC109188798 [Ipomoea nil]	--	SubName: Full=Uncharacterized protein {ECO:0000313|EMBL:CDP02495.1};	--	--	--
g11071	2.64	1.11	3.06	1.73	1.59	1.76	0	3.6	3.53	1.56	0.25	2.67	8.43	10.51	9.47	66	39	122	48	54	48	0	90	87	45	7	74	246	317	282	LG3	12168614	12174717	+	K17961 cytochrome P450 family 82 subfamily G polypeptide 1 [EC:1.14.-.-] | (RefSeq) cytochrome P450 82C4-like (A)	ko00904: Diterpenoid biosynthesis	PREDICTED: cytochrome P450 CYP82D47-like [Ipomoea nil]	RecName: Full=Cytochrome P450 82C4; EC=1.14.-.-;	SubName: Full=Uncharacterized protein {ECO:0000313|EMBL:PHT46626.1};	Cytochrome P450 CYP2 subfamily	GO:0016021,integral component of membrane; GO:0016020,membrane; GO:0020037,heme binding; GO:0005506,iron ion binding; GO:0004497,monooxygenase activity; GO:0016709,oxidoreductase activity, acting on paired donors, with incorporation or reduction of molecular oxygen, NAD(P)H as one donor, and incorporation of one atom of oxygen; GO:0071281,cellular response to iron ion; GO:0044550,secondary metabo…	PF00067.22:Cytochrome P450
g1108	6.38	11.75	7.8	11.94	20.24	10.12	21.13	15.15	23.6	17.94	21.49	11.2	13.31	15.9	14.605	681	1763	1327	1412	2933	1178	2371	1614	2479	2207	2561	1324	1657	2045	1851	LG1	6599245	6612101	-	K13168 splicing factor, arginine/serine-rich 16 | (RefSeq) CLK4-associating serine/arginine rich protein (A)	--	PREDICTED: uncharacterized protein LOC109150807 [Ipomoea nil]	RecName: Full=Putative ribonuclease H protein At1g65750; EC=3.1.26.4;	SubName: Full=Uncharacterized protein {ECO:0000313|EMBL:CDP02494.1};	FOG: Reverse transcriptase	GO:0046872,metal ion binding; GO:0003676,nucleic acid binding; GO:0004523,RNA-DNA hybrid ribonuclease activity	PF00078.27:Reverse transcriptase (RNA-dependent DNA polymerase)
g11080	9.17	4.57	4.33	6.83	9.08	9.59	3.25	6.38	4.77	9.88	1.38	0	11.66	6.78	9.22	137	96	103	113	184	156	51	95	70	170	23	0	203	122	163	LG3	12220758	12223402	+	K10523 speckle-type POZ protein | (RefSeq) BTB/POZ and MATH domain-containing protein 4-like (A)	--	PREDICTED: BTB/POZ and MATH domain-containing protein 4-like [Ipomoea nil]	RecName: Full=BTB/POZ and MATH domain-containing protein 4; AltName: Full=Protein BTB-POZ AND MATH DOMAIN 4; Short=AtBPM4;	SubName: Full=Uncharacterized protein {ECO:0000313|EnsemblPlants:PGSC0003DMT400070469};	Speckle-type POZ protein SPOP and related proteins with TRAF, MATH and BTB/POZ domains	GO:0005829,cytosol; GO:0071472,cellular response to salt stress; GO:0042631,cellular response to water deprivation; GO:0016567,protein ubiquitination; GO:0006970,response to osmotic stress	--
g11083	0	0	0	1.2	2.47	1.05	0	1.27	0	0.11	0	0	4.08	0.21	2.145	0	0	0	21	53	18	0	20	0	2	0	0	75	4	40	LG3	12229313	12230923	-	--	--	--	--	--	--	--	--
g11098	0.7	4.46	0	0	0	0	6.3	2.33	0	1.92	1.46	0	0	0	0	6	54	0	0	0	0	57	20	0	19	14	0	0	0	0	LG3	12359668	12360264	+	--	--	--	--	--	--	--	--
g1110	10.25	5.68	10.99	2.26	0.83	1.11	4.22	1.62	2.71	2.45	3.4	5.32	1.66	3.89	2.775	127	99	217	31	14	15	55	20	33	35	47	73	24	58	41	LG1	6623196	6625392	+	K13448 calcium-binding protein CML | (RefSeq) caltractin (A)	ko04626: Plant-pathogen interaction	PREDICTED: caltractin [Ipomoea nil]	RecName: Full=Caltractin; AltName: Full=Centrin;	SubName: Full=Uncharacterized protein {ECO:0000313|EMBL:KZM88655.1};	Ca2+-binding protein (centrin/caltractin), EF-Hand superfamily protein	GO:0005737,cytoplasm; GO:0005815,microtubule organizing center; GO:0005509,calcium ion binding; GO:0007049,cell cycle; GO:0051301,cell division	PF00036.32:EF hand
g11100	2.82	3.23	1.75	0.23	0.3	0.12	0.54	0	0.74	0.66	0.57	1.46	1.25	3.21	2.23	89	143	88	8	13	4	18	0	23	24	20	51	46	122	84	LG3	12376404	12384484	+	--	--	--	--	--	--	--	--
g11108	0	0	0	0.44	0.53	0.43	0	0.7	0.62	0.29	0.94	0.38	0.27	0.04	0.155	0	0	0	23	34	22	0	33	29	16	50	20	15	2	9	LG3	12445954	12449902	+	K13457 disease resistance protein RPM1 | (RefSeq) disease resistance protein RPM1-like (A)	ko04626: Plant-pathogen interaction	PREDICTED: disease resistance protein RPP13-like [Ipomoea nil]	RecName: Full=Putative late blight resistance protein homolog R1A-6;	SubName: Full=putative late blight resistance protein homolog R1B-16 {ECO:0000313|RefSeq:XP_016468676.1, ECO:0000313|RefSeq:XP_016468677.1, ECO:0000313|RefSeq:XP_016468678.1};	Apoptotic ATPase	GO:0005737,cytoplasm; GO:0016020,membrane; GO:0043531,ADP binding; GO:0005524,ATP binding; GO:0009626,plant-type hypersensitive response	PF00931.22:NB-ARC domain
g11109	0	0	0.02	4.02	4.1	3.88	2.75	0	3.32	0	3.69	5.03	0.19	0.55	0.37	0	0	1	120	150	114	78	0	88	0	111	150	6	18	12	LG3	12451394	12455651	+	K13457 disease resistance protein RPM1 | (RefSeq) disease resistance protein RPM1-like (A)	ko04626: Plant-pathogen interaction	PREDICTED: putative late blight resistance protein homolog R1A-10 [Ipomoea nil]	RecName: Full=Disease resistance protein RPP13; AltName: Full=Resistance to Peronospora parasitica protein 13;	SubName: Full=disease resistance protein RPP13-like {ECO:0000313|RefSeq:XP_016459110.1};	Apoptotic ATPase	GO:0005737,cytoplasm; GO:0005886,plasma membrane; GO:0043531,ADP binding; GO:0005524,ATP binding; GO:0009814,defense response, incompatible interaction; GO:0009626,plant-type hypersensitive response; GO:0007165,signal transduction	PF00931.22:NB-ARC domain
g11116	1.21	0.37	0.53	1.71	1.49	3.95	0.53	1.21	0.99	2.04	1.52	0.88	0.42	0.32	0.37	37	16	26	58	62	132	17	37	30	72	52	30	15	12	14	LG3	12504564	12508964	+	K03452 magnesium/proton exchanger | (RefSeq) pentatricopeptide repeat-containing protein At3g62890-like (A)	--	PREDICTED: pentatricopeptide repeat-containing protein At1g05750, chloroplastic [Ipomoea nil]	RecName: Full=Pentatricopeptide repeat-containing protein At1g05750, chloroplastic; AltName: Full=Protein PIGMENT DEFECTIVE 247; Flags: Precursor;	SubName: Full=pentatricopeptide repeat-containing protein At1g05750, chloroplastic {ECO:0000313|RefSeq:XP_009769649.1};	FOG: PPR repeat	GO:0009507,chloroplast; GO:0004519,endonuclease activity; GO:0003723,RNA binding; GO:0009451,RNA modification	PF13041.6:PPR repeat family
g1112	10.15	5.54	4.8	3.53	7.18	5.93	7.55	4.36	7.54	10.32	11.08	11.3	10.89	11.67	11.28	275	211	207	106	264	175	215	118	201	322	335	339	344	381	363	LG1	6637096	6640758	+	K03257 translation initiation factor 4A | (RefSeq) eukaryotic initiation factor 4A-I (A)	ko03013: RNA transport	PREDICTED: eukaryotic initiation factor 4A-I [Ipomoea nil]	RecName: Full=DEAD-box ATP-dependent RNA helicase 34 {ECO:0000303|PubMed:17168887}; Short=AtRH34 {ECO:0000303|PubMed:17168887}; EC=3.6.4.13 {ECO:0000305};	SubName: Full=eukaryotic initiation factor 4A-I-like {ECO:0000313|RefSeq:XP_016440971.1};	Predicted ATP-dependent RNA helicase FAL1, involved in rRNA maturation, DEAD-box superfamily	GO:0071013,catalytic step 2 spliceosome; GO:0005737,cytoplasm; GO:0005730,nucleolus; GO:0005524,ATP binding; GO:0004004,ATP-dependent RNA helicase activity; GO:0003723,RNA binding; GO:0010468,regulation of gene expression; GO:0010501,RNA secondary structure unwinding; GO:0008380,RNA splicing; GO:0006364,rRNA processing	PF00271.31:Helicase conserved C-terminal domain
g1113	0	0.54	1.16	0.62	0.64	1.53	0	0	1.22	2.78	2.7	1.58	1.96	3.35	2.655	0	21	51	19	24	46	0	0	33	88	83	48	63	111	87	LG1	6641416	6645097	+	--	--	PREDICTED: uncharacterized membrane protein At3g27390-like isoform X1 [Ipomoea nil]	RecName: Full=Uncharacterized membrane protein At3g27390;	SubName: Full=uncharacterized membrane protein At3g27390-like {ECO:0000313|RefSeq:XP_016476435.1};	--	GO:0016021,integral component of membrane; GO:0005886,plasma membrane	--
g11139	0	0.76	0	0	0	0	0	0.98	0	1.15	0	2.52	0	0.22	0.11	0	24	0	0	0	0	0	22	0	30	0	63	0	6	3	LG3	12640157	12641720	-	K22683 aspartyl protease family protein [EC:3.4.23.-] | (RefSeq) aspartyl protease family protein 2-like (A)	--	PREDICTED: probable aspartyl protease At4g16563 [Ipomoea nil]	RecName: Full=Aspartic proteinase nepenthesin-2; EC=3.4.23.12; AltName: Full=Nepenthesin-II; Flags: Precursor;	SubName: Full=Putative aspartic proteinase nepenthesin-1-like {ECO:0000313|EMBL:JAP29439.1};	Aspartyl protease	GO:0005576,extracellular region; GO:0004190,aspartic-type endopeptidase activity	PF14541.6:Xylanase inhibitor C-terminal
g1114	1.38	3.41	1.63	2.11	2.45	4.76	1.6	2.12	2.5	3.15	2.48	1.44	6.93	3.12	5.025	32	111	60	54	77	120	39	49	57	84	64	37	187	87	137	LG1	6645352	6648691	-	--	--	PREDICTED: cyclin-dependent kinase inhibitor 7-like [Ipomoea nil]	--	RecName: Full=Cyclin-dependent kinase inhibitor {ECO:0000256|PIRNR:PIRNR017811};	--	GO:0005634,nucleus; GO:0004861,cyclin-dependent protein serine/threonine kinase inhibitor activity; GO:0007050,cell cycle arrest	PF02234.19:Cyclin-dependent kinase inhibitor
g11145	4.21	5.84	2.76	8.42	6.7	4.15	2.2	2.62	3.25	6.43	6.84	2.61	2.36	2.17	2.265	95	185	99	210	205	102	52	59	72	167	172	65	62	59	61	LG3	12676456	12683110	-	K13206 coiled-coil domain-containing protein 55 | (RefSeq) nuclear speckle splicing regulatory protein 1-like (A)	--	PREDICTED: nuclear speckle splicing regulatory protein 1-like [Ipomoea nil]	--	SubName: Full=Uncharacterized protein {ECO:0000313|EMBL:OIT06096.1};	Uncharacterized conserved protein	--	PF09745.9:Coiled-coil domain-containing protein 55 (DUF2040)
g11148	0.68	0	1.33	0.88	3.96	1.05	0	0.38	0.13	3.45	1.82	1.26	1.71	0.88	1.295	16	0	50	23	127	27	0	9	3	94	48	33	47	25	36	LG3	12701065	12705060	-	--	--	PREDICTED: uncharacterized protein LOC109181216 [Ipomoea nil]	--	--	--	--	PF13961.6:Domain of unknown function (DUF4219)
g11149	0.57	0.03	0	1.11	3.47	1.05	1.57	1.69	1.28	4.42	6.2	1.56	0.26	2.13	1.195	15	1	0	32	123	30	43	44	33	133	181	45	8	67	38	LG3	12706387	12711380	-	--	--	PREDICTED: uncharacterized protein LOC109147049 [Ipomoea nil]	--	SubName: Full=Putative transposase {ECO:0000313|EMBL:BAF64710.1};	--	--	PF08646.10:Replication factor-A C terminal domain
g11153	11.36	13.63	5.94	10.85	12.8	5.92	23.5	6.68	25.03	30.89	33.15	16.06	4.5	11.88	8.19	312	526	260	330	477	177	678	183	676	977	1016	488	144	393	269	LG3	12751378	12754888	+	K07466 replication factor A1 | (RefSeq) replication protein A 70 kDa DNA-binding subunit B-like (A)	ko03030: DNA replication; ko03420: Nucleotide excision repair; ko03430: Mismatch repair; ko03440: Homologous recombination	putative transposase [Ipomoea tricolor]	RecName: Full=Replication protein A 70 kDa DNA-binding subunit B; Short=AtRPA70B; AltName: Full=AtRPA1-5; AltName: Full=Replication factor A protein 1B; AltName: Full=Replication protein A 1B; Short=AtRPA1B;	SubName: Full=Putative transposase {ECO:0000313|EMBL:BAF64710.1};	Single-stranded DNA-binding replication protein A (RPA), large (70 kD) subunit and related ssDNA-binding proteins	GO:0005634,nucleus; GO:0003677,DNA binding; GO:0046872,metal ion binding; GO:0006310,DNA recombination; GO:0006281,DNA repair; GO:0006260,DNA replication; GO:0010224,response to UV-B	PF08646.10:Replication factor-A C terminal domain
g11154	0.53	0.04	0	0.28	2.84	0.79	0	0.76	0	0.99	2.1	0.76	0.32	0.25	0.285	36	4	0	21	260	58	0	51	0	77	158	57	25	20	23	LG3	12755838	12764807	+	K15397 3-ketoacyl-CoA synthase [EC:2.3.1.199] | (RefSeq) uncharacterized LOC109185251 (A)	ko00062: Fatty acid elongation; ko04626: Plant-pathogen interaction	PREDICTED: uncharacterized protein LOC109156663 [Ipomoea nil]	RecName: Full=Retrovirus-related Pol polyprotein from transposon TNT 1-94; Includes: RecName: Full=Protease; EC=3.4.23.-; Includes: RecName: Full=Reverse transcriptase; EC=2.7.7.49; Includes: RecName: Full=Endonuclease;	SubName: Full=Uncharacterized protein {ECO:0000313|EMBL:CAN74951.1}; Flags: Fragment;	FOG: Transposon-encoded proteins with TYA, reverse transcriptase, integrase domains in various combinations	GO:0004190,aspartic-type endopeptidase activity; GO:0004519,endonuclease activity; GO:0003676,nucleic acid binding; GO:0003964,RNA-directed DNA polymerase activity; GO:0008270,zinc ion binding; GO:0015074,DNA integration	PF14223.6:gag-polypeptide of LTR copia-type
g11156	6.24	6.69	13.28	10.38	8.53	7.48	7.84	4.91	2.22	15.28	7.02	7.69	6.76	16.05	11.405	140	211	475	258	260	183	185	110	49	395	176	191	177	434	306	LG3	12770508	12777367	+	K13206 coiled-coil domain-containing protein 55 | (RefSeq) nuclear speckle splicing regulatory protein 1-like (A)	--	PREDICTED: nuclear speckle splicing regulatory protein 1-like [Ipomoea nil]	--	SubName: Full=Uncharacterized protein {ECO:0000313|EnsemblPlants:PGSC0003DMT400050491};	Uncharacterized conserved protein	--	PF09745.9:Coiled-coil domain-containing protein 55 (DUF2040)
g11169	6.77	2.24	0	2.01	1.3	1.11	1.68	5.3	3.21	0	1.41	3.19	0	0.69	0.345	73	34	0	24	19	13	19	57	34	0	17	38	0	9	5	LG3	12862578	12863324	+	--	--	--	--	--	--	--	--
g1117	16.14	6.39	13.3	10.28	9.56	9.32	17.7	21	21.18	6.01	5.84	2.28	8.36	15.01	11.685	275	153	361	194	221	173	317	357	355	118	111	43	166	308	237	LG1	6675358	6677958	+	--	--	PREDICTED: uncharacterized protein LOC109188781 [Ipomoea nil]	--	RecName: Full=Sulfotransferase {ECO:0000256|RuleBase:RU361155}; EC=2.8.2.- {ECO:0000256|RuleBase:RU361155};	--	GO:0016021,integral component of membrane; GO:0008146,sulfotransferase activity	PF13469.6:Sulfotransferase family
g11170	5.65	12.39	6.78	1.35	2.55	0.81	7.32	3.08	7.31	8.84	5.3	3.54	4.88	7.21	6.045	147	453	281	39	90	23	200	80	187	265	154	102	148	226	187	LG3	12867838	12870619	+	K15255 ATP-dependent DNA helicase PIF1 [EC:3.6.4.12] | (RefSeq) uncharacterized LOC109162730 (A)	--	PREDICTED: uncharacterized protein LOC109178737 [Ipomoea nil]	--	SubName: Full=Putative transposase {ECO:0000313|EMBL:BAF64710.1};	Single-stranded DNA-binding replication protein A (RPA), large (70 kD) subunit and related ssDNA-binding proteins	--	PF08646.10:Replication factor-A C terminal domain
g11177	1.82	0	0.18	0.72	0.97	1.2	5.69	2.19	2.52	1.33	0.59	2.77	4.19	2.24	3.215	25	0	4	11	18	18	82	30	34	21	9	42	67	37	52	LG3	12911509	12912673	-	K09458 3-oxoacyl-[acyl-carrier-protein] synthase II [EC:2.3.1.179] | (RefSeq) 3-oxoacyl-[acyl-carrier-protein] synthase II, chloroplastic-like (A)	ko00061: Fatty acid biosynthesis; ko00780: Biotin metabolism; ko01212: Fatty acid metabolism	PREDICTED: 3-oxoacyl-[acyl-carrier-protein]	RecName: Full=3-oxoacyl-[acyl-carrier-protein] synthase II, chloroplastic; EC=2.3.1.41; AltName: Full=Beta-ketoacyl-acyl-carrier-protein synthase II; Short=AtKAS2; Short=Beta-ketoacyl-ACP synthetase 2; AltName: Full=Protein FATTY ACID BIOSYNTHESIS 1; Flags: Precursor;	SubName: Full=3-oxoacyl-[acyl-carrier-protein] synthase II, chloroplastic {ECO:0000313|EMBL:KHN07879.1}; EC=2.3.1.179 {ECO:0000313|EMBL:KHN07879.1};	3-oxoacyl-(acyl-carrier-protein) synthase (I and II)	GO:0009507,chloroplast; GO:0009570,chloroplast stroma; GO:0009536,plastid; GO:0004315,3-oxoacyl-[acyl-carrier-protein] synthase activity; GO:0009631,cold acclimation; GO:0009793,embryo development ending in seed dormancy; GO:0006633,fatty acid biosynthetic process; GO:0006636,unsaturated fatty acid biosynthetic process	--
g11181	0	0	0	0.99	0.25	0.26	0	0.06	0	0	1.08	0.05	1.92	0.91	1.415	0	0	0	19	6	5	0	1	0	0	21	1	39	19	29	LG3	12937455	12946313	+	K10527 enoyl-CoA hydratase/3-hydroxyacyl-CoA dehydrogenase [EC:4.2.1.17 1.1.1.35 1.1.1.211] | (RefSeq) peroxisomal fatty acid beta-oxidation multifunctional protein AIM1-like (A)	ko00071: Fatty acid degradation; ko00592: alpha-Linolenic acid metabolism; ko01212: Fatty acid metabolism	unknown [Lotus japonicus]	RecName: Full=Peroxisomal fatty acid beta-oxidation multifunctional protein AIM1; AltName: Full=Protein ABNORMAL INFLORESCENCE MERISTEM 1; Short=AtAIM1; Includes: RecName: Full=Enoyl-CoA hydratase/3-2-trans-enoyl-CoA isomerase/3-hydroxybutyryl-CoA epimerase; EC=4.2.1.17; EC=5.1.2.3; EC=5.3.3.8; Includes: RecName: Full=3-hydroxyacyl-CoA dehydrogenase; EC=1.1.1.35;	SubName: Full=Uncharacterized protein {ECO:0000313|EMBL:AFK48400.1};	Hydroxyacyl-CoA dehydrogenase/enoyl-CoA hydratase	GO:0005618,cell wall; GO:0009507,chloroplast; GO:0005777,peroxisome; GO:0009506,plasmodesma; GO:0003857,3-hydroxyacyl-CoA dehydrogenase activity; GO:0008692,3-hydroxybutyryl-CoA epimerase activity; GO:0004165,dodecenoyl-CoA delta-isomerase activity; GO:0004300,enoyl-CoA hydratase activity; GO:0006635,fatty acid beta-oxidation; GO:0009908,flower development; GO:0009695,jasmonic acid biosynthetic p…	PF00725.22:3-hydroxyacyl-CoA dehydrogenase, C-terminal domain
g11188	0.94	0.18	0	0.58	0.15	0.32	2.32	7.48	3.23	1.51	1.43	0	0.17	0.12	0.145	19	5	0	13	4	7	49	150	64	35	32	0	4	3	4	LG3	12999075	13003793	+	--	--	PREDICTED: protein FAR1-RELATED SEQUENCE 7-like [Ipomoea nil]	--	--	--	--	--
g11191	1.04	0.71	0.03	0.63	0.42	0.36	0.58	0.17	0	0	0	0	2.57	2.02	2.295	24	23	1	16	13	9	14	4	0	0	0	0	69	56	63	LG3	13013678	13020080	-	K00600 glycine hydroxymethyltransferase [EC:2.1.2.1] | (RefSeq) serine hydroxymethyltransferase 2, mitochondrial-like (A)	ko00260: Glycine, serine and threonine metabolism; ko00460: Cyanoamino acid metabolism; ko00630: Glyoxylate and dicarboxylate metabolism; ko00670: One carbon pool by folate; ko01200: Carbon metabolism; ko01230: Biosynthesis of amino acids	PREDICTED: serine hydroxymethyltransferase 2, mitochondrial-like isoform X1 [Ipomoea nil]	RecName: Full=Serine hydroxymethyltransferase, mitochondrial; Short=SHMT; EC=2.1.2.1; AltName: Full=Glycine hydroxymethyltransferase; AltName: Full=Serine methylase; Flags: Precursor;	SubName: Full=SHM1 {ECO:0000313|EMBL:AGN52925.1}; Flags: Fragment;	Glycine/serine hydroxymethyltransferase	GO:0048046,apoplast; GO:0009570,chloroplast stroma; GO:0009534,chloroplast thylakoid; GO:0022626,cytosolic ribosome; GO:0005739,mitochondrion; GO:0005634,nucleus; GO:0005886,plasma membrane; GO:0010319,stromule; GO:0004372,glycine hydroxymethyltransferase activity; GO:0008266,poly(U) RNA binding; GO:0030170,pyridoxal phosphate binding; GO:0007623,circadian rhythm; GO:0019264,glycine biosynthetic …	PF00464.19:Serine hydroxymethyltransferase
g11195	0.69	0.72	0.41	0.22	0.34	0.8	1.1	1.18	0.33	4.02	2.6	4.01	2.47	1.07	1.77	25	37	24	9	17	32	42	43	12	169	106	162	105	47	76	LG3	13057375	13060660	-	K13457 disease resistance protein RPM1 | (RefSeq) disease resistance protein RPM1-like (A)	ko04626: Plant-pathogen interaction	PREDICTED: putative late blight resistance protein homolog R1C-3 [Ipomoea nil]	RecName: Full=Putative late blight resistance protein homolog R1A-3;	SubName: Full=Uncharacterized protein {ECO:0000313|EMBL:PHT67193.1};	Apoptotic ATPase	GO:0005737,cytoplasm; GO:0016020,membrane; GO:0043531,ADP binding; GO:0005524,ATP binding; GO:0009626,plant-type hypersensitive response	PF00931.22:NB-ARC domain
g11198	6.38	17.21	13.88	4.23	2.65	5.09	6.78	8.47	6.86	18.19	19.03	20.99	17.58	14.16	15.87	154	584	534	113	87	134	172	204	163	506	513	561	495	412	454	LG3	13075495	13085405	+	K10364 capping protein (actin filament) muscle Z-line, alpha | (RefSeq) F-actin-capping protein subunit alpha (A)	ko04144: Endocytosis	PREDICTED: F-actin-capping protein subunit alpha isoform X1 [Ipomoea nil]	RecName: Full=F-actin-capping protein subunit alpha; AltName: Full=CapZ alpha;	SubName: Full=Subunits of heterodimeric actin filament capping protein Capz superfamily isoform 1 {ECO:0000313|EMBL:EOY11504.1};	F-actin capping protein, alpha subunit	GO:0008290,F-actin capping protein complex; GO:0003779,actin binding; GO:0051016,barbed-end actin filament capping	PF01267.17:F-actin capping protein alpha subunit
g11219	1.24	1.38	1.26	0.45	1.06	1.82	3.73	2.93	9.24	4.69	3.4	4.21	9.64	11.48	10.56	37	58	60	15	43	59	117	87	271	161	113	139	335	412	374	LG3	13229077	13232131	+	--	--	PREDICTED: replication protein A 70 kDa DNA-binding subunit D-like [Ipomoea nil]	--	SubName: Full=Putative transposase {ECO:0000313|EMBL:BAF64710.1};	Single-stranded DNA-binding replication protein A (RPA), large (70 kD) subunit and related ssDNA-binding proteins	--	PF08646.10:Replication factor-A C terminal domain
g11223	0	0.05	0	0	0.1	0.34	1.34	0.83	0.9	0	0	0	0.11	0	0.055	0	3	0	0	6	17	65	38	41	0	0	0	6	0	3	LG3	13254646	13260752	-	--	--	PREDICTED: uncharacterized protein LOC109163356 [Ipomoea nil]	--	--	--	--	--
g11224	0	0.26	0	0.39	0.29	0.03	0	0	0	0.23	0.63	2.14	0	0.97	0.485	0	11	0	13	12	1	0	0	0	8	21	71	0	35	18	LG3	13266204	13275912	-	--	--	--	--	--	--	--	--
g11226	14.44	20.94	8.41	12.51	16.35	13.54	10.08	7.99	10.54	48.78	36.74	30.72	17.59	24.58	21.085	319	650	296	306	490	326	234	176	229	1241	906	751	453	654	554	LG3	13279387	13281812	-	K07466 replication factor A1 | (RefSeq) replication protein A 70 kDa DNA-binding subunit B-like (A)	ko03030: DNA replication; ko03420: Nucleotide excision repair; ko03430: Mismatch repair; ko03440: Homologous recombination	PREDICTED: uncharacterized protein LOC109187171 [Ipomoea nil]	--	SubName: Full=Uncharacterized protein {ECO:0000313|EMBL:CDP04679.1};	--	GO:0016021,integral component of membrane	PF16900.5:Replication protein A OB domain
g11229	0	0	0	0	0	0	0	0	0	1.44	0.18	0.98	0	0.23	0.115	0	0	0	0	0	0	0	0	0	41	5	27	0	7	4	LG3	13296024	13298114	+	K11294 nucleolin | (RefSeq) nucleolin-like (A)	--	PREDICTED: uncharacterized protein LOC109158743 [Ipomoea nil]	--	SubName: Full=Uncharacterized protein {ECO:0000313|EMBL:CCA66008.1};	FOG: Reverse transcriptase	GO:0003676,nucleic acid binding; GO:0008270,zinc ion binding	PF14111.6:Domain of unknown function (DUF4283)
g1123	1.05	4.88	3.45	10.32	9.15	9.3	6.64	7.74	4.77	4.93	5.15	3.68	6.09	9.69	7.89	17	111	89	185	201	164	113	125	76	92	93	66	115	189	152	LG1	6725848	6727480	+	K04708 3-dehydrosphinganine reductase [EC:1.1.1.102] | (RefSeq) 3-dehydrosphinganine reductase TSC10A-like (A)	ko00600: Sphingolipid metabolism	PREDICTED: carbonyl reductase family member 4 [Ipomoea nil]	RecName: Full=NADPH-dependent aldehyde reductase-like protein, chloroplastic {ECO:0000250|UniProtKB:Q9SQR2}; EC=1.1.1.- {ECO:0000250|UniProtKB:Q9SQR2}; Flags: Precursor;	SubName: Full=3-ketodihydrosphingosine reductase-like {ECO:0000313|RefSeq:XP_016508435.1};	17 beta-hydroxysteroid dehydrogenase type 3, HSD17B3	GO:0009507,chloroplast; GO:0016491,oxidoreductase activity	PF00106.25:short chain dehydrogenase
g11246	1.03	1.31	0.94	0	0	0	0.95	1.75	1.21	0.76	0.2	1.72	2.68	1.14	1.91	33	59	48	0	0	0	32	56	38	28	7	61	100	44	72	LG3	13439554	13443198	+	--	--	PREDICTED: uncharacterized protein LOC109167507 [Ipomoea nil]	--	SubName: Full=uncharacterized protein LOC109014810 {ECO:0000313|RefSeq:XP_018852850.1};	FOG: Reverse transcriptase	--	PF13456.6:Reverse transcriptase-like
g11247	2.23	4.79	2.35	2.03	2.13	2.72	4.44	1.63	1.18	3.5	2.43	4.89	1.29	1.7	1.495	123	372	207	124	160	164	258	90	64	223	150	299	83	113	98	LG3	13444726	13451059	-	--	--	PREDICTED: transcription factor LHW-like isoform X1 [Ipomoea nil]	RecName: Full=Transcription factor LHW; AltName: Full=BHLH transcription factor delta; Short=bHLH delta; AltName: Full=Basic helix-loop-helix protein 156; Short=AtbHLH156; Short=bHLH 156; AltName: Full=Protein LONESOME HIGHWAY; AltName: Full=bHLH transcription factor bHLH156;	SubName: Full=transcription factor LHW-like isoform X1 {ECO:0000313|RefSeq:XP_009804415.1};	--	GO:0005634,nucleus; GO:0003677,DNA binding; GO:0003700,DNA-binding transcription factor activity; GO:0046983,protein dimerization activity; GO:0010078,maintenance of root meristem identity; GO:0045893,positive regulation of transcription, DNA-templated; GO:0006355,regulation of transcription, DNA-templated; GO:0048364,root development; GO:0010479,stele development; GO:0006351,transcription, DNA-t…	PF14215.6:bHLH-MYC and R2R3-MYB transcription factors N-terminal
g1125	12.17	13.83	10.81	7.57	11.39	8.55	25.25	17.02	26.3	22.02	18.25	13.97	10.69	8.37	9.53	600	958	849	413	762	459	1308	837	1275	1250	1004	762	614	497	556	LG1	6732566	6744783	-	K00924 kinase [EC:2.7.1.-] | (RefSeq) CDPK-related kinase 5-like (A)	--	hypothetical protein B456_008G074300 [Gossypium raimondii]	RecName: Full=CDPK-related protein kinase; EC=2.7.11.1; AltName: Full=PK421;	SubName: Full=Uncharacterized protein {ECO:0000313|EMBL:KJB48534.1};	Ca2+/calmodulin-dependent protein kinase, EF-Hand protein superfamily	GO:0005524,ATP binding; GO:0004674,protein serine/threonine kinase activity	PF00069.25:Protein kinase domain
g1126	0	2.66	0	1.13	0.92	0.76	0	0	0	2.53	2.18	7.47	1.22	1.04	1.13	0	63	0	21	21	14	0	0	0	49	41	139	24	21	23	LG1	6750248	6752433	-	K00430 peroxidase [EC:1.11.1.7] | (RefSeq) peroxidase 10-like (A)	ko00940: Phenylpropanoid biosynthesis	PREDICTED: peroxidase 10-like [Ipomoea nil]	RecName: Full=Peroxidase 10; Short=Atperox P10; EC=1.11.1.7; AltName: Full=ATP5a; Flags: Precursor;	RecName: Full=Peroxidase {ECO:0000256|RuleBase:RU362060, ECO:0000256|SAAS:SAAS00709852}; EC=1.11.1.7 {ECO:0000256|RuleBase:RU362060, ECO:0000256|SAAS:SAAS00709852};	--	GO:0005576,extracellular region; GO:0020037,heme binding; GO:0046872,metal ion binding; GO:0004601,peroxidase activity; GO:0042744,hydrogen peroxide catabolic process; GO:0006979,response to oxidative stress	PF00141.23:Peroxidase
g11260	0.47	0.37	5.09	1.81	1.48	1.11	0.71	1.4	0.14	5.3	6.35	1.35	8.48	2.05	5.265	10	11	174	43	43	26	16	30	3	131	152	32	212	53	133	LG3	13549184	13558722	-	--	--	uncharacterized protein LOC110031568 [Phalaenopsis equestris]	--	SubName: Full=Uncharacterized protein {ECO:0000313|EMBL:CAN79193.1};	--	GO:0003676,nucleic acid binding; GO:0015074,DNA integration	--
g11264	7.71	5.97	3.97	10.73	6.68	11.04	4.28	5.51	5.26	11.31	10.62	17.7	5.45	6.93	6.19	216	235	177	333	254	337	126	154	145	365	332	549	178	234	206	LG3	13582688	13590812	-	K09579 peptidyl-prolyl cis-trans isomerase NIMA-interacting 4 [EC:5.2.1.8] | (RefSeq) peptidyl-prolyl cis-trans isomerase NIMA-interacting 4 (A)	--	PREDICTED: rhodanese-like/PpiC domain-containing protein 12, chloroplastic [Ipomoea nil]	RecName: Full=Rhodanese-like/PpiC domain-containing protein 12, chloroplastic; AltName: Full=Sulfurtransferase 12; Short=AtStr12; Flags: Precursor;	SubName: Full=rhodanese-like/PpiC domain-containing protein 12, chloroplastic {ECO:0000313|RefSeq:XP_016487589.1};	Molybdopterin synthase sulfurylase	GO:0009507,chloroplast; GO:0016853,isomerase activity; GO:0009735,response to cytokinin	PF13616.6:PPIC-type PPIASE domain
g11275	95.55	87.96	109.43	55.4	31.6	62.48	72.43	67.79	62.01	105.21	110.48	116.85	35.05	30.28	32.665	1656	2142	3021	1063	743	1180	1319	1172	1057	2100	2137	2241	708	632	670	LG3	13657642	13660068	+	K02984 small subunit ribosomal protein S3Ae | (RefSeq) 40S ribosomal protein S3a (A)	ko03010: Ribosome	40S ribosomal protein S3a [Sesamum indicum]	RecName: Full=40S ribosomal protein S3a {ECO:0000255|HAMAP-Rule:MF_03122}; AltName: Full=CYC07 protein;	RecName: Full=40S ribosomal protein S3a {ECO:0000256|HAMAP-Rule:MF_03122};	40S ribosomal protein S3A	GO:0005840,ribosome; GO:0003735,structural constituent of ribosome; GO:0006412,translation	PF01015.18:Ribosomal S3Ae family
g11276	41.13	5.1	33.53	4.41	1.99	2.39	5.78	8.79	1.62	4.32	2	1.69	2.7	4.17	3.435	901	157	1170	107	59	57	133	192	35	109	49	41	69	110	90	LG3	13665722	13669263	+	K00924 kinase [EC:2.7.1.-] | (RefSeq) probable receptor-like protein kinase At5g47070 (A)	--	PREDICTED: protein kinase 2B, chloroplastic-like [Ipomoea nil]	RecName: Full=Probable serine/threonine-protein kinase PBL3 {ECO:0000305}; EC=2.7.11.1 {ECO:0000305}; AltName: Full=PBS1-like protein 3 {ECO:0000303|PubMed:20413097}; AltName: Full=Protein kinase 2B {ECO:0000305};	SubName: Full=Uncharacterized protein {ECO:0000313|EMBL:JAP27857.1};	Serine/threonine protein kinase	GO:0005737,cytoplasm; GO:0005634,nucleus; GO:0005886,plasma membrane; GO:0005524,ATP binding; GO:0004675,transmembrane receptor protein serine/threonine kinase activity; GO:0007166,cell surface receptor signaling pathway; GO:0006952,defense response; GO:0006468,protein phosphorylation	PF07714.17:Protein tyrosine kinase
g11277	19.25	16.03	17.88	29.86	22.97	28.15	28.04	22.54	31.15	61.34	61.89	50.76	20.53	22.78	21.655	588	688	870	1010	952	937	900	687	936	2158	2110	1716	731	838	785	LG3	13670305	13679347	-	K07198 5'-AMP-activated protein kinase, catalytic alpha subunit [EC:2.7.11.11] | (RefSeq) CBL-interacting protein kinase 18-like (A)	--	PREDICTED: CBL-interacting serine/threonine-protein kinase 3-like isoform X1 [Ipomoea nil]	RecName: Full=CBL-interacting serine/threonine-protein kinase 3; EC=2.7.11.1; AltName: Full=SNF1-related kinase 3.17; AltName: Full=SOS2-like protein kinase PKS12;	RecName: Full=Non-specific serine/threonine protein kinase {ECO:0000256|SAAS:SAAS00351747}; EC=2.7.11.1 {ECO:0000256|SAAS:SAAS00351747};	Serine/threonine protein kinase	GO:0005622,intracellular; GO:0005524,ATP binding; GO:0004674,protein serine/threonine kinase activity; GO:0035556,intracellular signal transduction	PF00069.25:Protein kinase domain
g11278	3.72	2.07	1.83	1.75	0.54	0.52	9.93	4.38	12.5	2.39	1.23	3.73	6.8	0.87	3.835	46	36	36	24	9	7	129	54	152	34	17	51	98	13	56	LG3	13682784	13684917	-	K12176 COP9 signalosome complex subunit 2 | (RefSeq) COP9 signalosome complex subunit 2-like (A)	--	PREDICTED: COP9 signalosome complex subunit 2 isoform X2 [Ipomoea nil]	RecName: Full=COP9 signalosome complex subunit 2; Short=Signalosome subunit 2; AltName: Full=Protein FUSCA 12;	SubName: Full=Cop9 signalosome complex subunit 2 {ECO:0000313|EMBL:OIT21414.1};	COP9 signalosome, subunit CSN2	GO:0008180,COP9 signalosome; GO:0005829,cytosol; GO:0005634,nucleus; GO:0003714,transcription corepressor activity; GO:0007275,multicellular organism development; GO:0045892,negative regulation of transcription, DNA-templated; GO:0030163,protein catabolic process; GO:0000338,protein deneddylation; GO:0009585,red, far-red light phototransduction	PF01399.27:PCI domain
g1128	104.03	152.08	118.43	81.75	70.66	64.26	146.35	124.34	153.59	58.17	46.58	59.17	39.26	42.94	41.1	3022	6207	5480	2629	2785	2034	4467	3603	4388	1946	1510	1902	1329	1502	1416	LG1	6759838	6763761	+	K14498 serine/threonine-protein kinase SRK2 [EC:2.7.11.1] | (RefSeq) serine/threonine-protein kinase SRK2I (A)	ko04016: MAPK signaling pathway - plant; ko04075: Plant hormone signal transduction	PREDICTED: serine/threonine-protein kinase SRK2I [Ipomoea nil]	RecName: Full=Serine/threonine-protein kinase SRK2I; EC=2.7.11.1; AltName: Full=OST1-kinase-like 2; AltName: Full=Protein ATHPROKIN B; AltName: Full=SNF1-related kinase 2.3; Short=SnRK2.3;	SubName: Full=serine/threonine-protein kinase SRK2I-like {ECO:0000313|RefSeq:XP_009777005.1};	Serine/threonine protein kinase	GO:0005737,cytoplasm; GO:0005829,cytosol; GO:0005634,nucleus; GO:0005524,ATP binding; GO:0016301,kinase activity; GO:0004672,protein kinase activity; GO:0004674,protein serine/threonine kinase activity; GO:0009738,abscisic acid-activated signaling pathway; GO:0035556,intracellular signal transduction; GO:0010029,regulation of seed germination; GO:0009737,response to abscisic acid; GO:0009739,resp…	PF00069.25:Protein kinase domain
g11283	0	0	0	0.13	0.22	0.61	0	0	0	1.1	0	0.94	0	0	0	0	0	0	4	8	18	0	0	0	34	0	28	0	0	0	LG3	13722713	13725807	-	K20617 cytochrome P450 family 71 subfamily A | (RefSeq) cytochrome P450 71A1-like (A)	--	PREDICTED: premnaspirodiene oxygenase-like [Ipomoea nil]	RecName: Full=Premnaspirodiene oxygenase; Short=HPO; EC=1.14.13.121; AltName: Full=Cytochrome P450 71D55;	SubName: Full=premnaspirodiene oxygenase-like {ECO:0000313|RefSeq:XP_016497448.1};	Cytochrome P450 CYP2 subfamily	GO:0016021,integral component of membrane; GO:0020037,heme binding; GO:0005506,iron ion binding; GO:0004497,monooxygenase activity; GO:0016705,oxidoreductase activity, acting on paired donors, with incorporation or reduction of molecular oxygen	PF00067.22:Cytochrome P450
g1129	3.6	2.15	4.1	1.2	1.84	0.9	2.55	2.28	2.6	1.18	5.57	0	1.19	0.56	0.875	117	98	212	43	81	32	87	74	83	44	202	0	45	22	34	LG1	6767708	6771378	+	K19791 iron transport multicopper oxidase | (RefSeq) L-ascorbate oxidase homolog (A)	--	PREDICTED: L-ascorbate oxidase homolog [Ipomoea nil]	RecName: Full=L-ascorbate oxidase homolog; EC=1.10.3.-; AltName: Full=Pollen-specific protein NTP303; Flags: Precursor;	SubName: Full=L-ascorbate oxidase-like protein {ECO:0000313|EMBL:OIS97837.1};	Multicopper oxidases	GO:0005615,extracellular space; GO:0005507,copper ion binding; GO:0016491,oxidoreductase activity	PF07732.15:Multicopper oxidase
g11295	5.84	6.69	6.08	6.8	15.69	8.58	5.47	5.06	5.42	16.66	12.05	15.48	7.7	9.36	8.53	401	646	665	517	1462	642	395	347	366	1318	924	1177	616	774	695	LG3	13819051	13837025	-	K11886 proteasome component ECM29 | (RefSeq) proteasome-associated protein ECM29 homolog (A)	--	PREDICTED: proteasome-associated protein ECM29 homolog isoform X2 [Ipomoea nil]	--	SubName: Full=Putative proteasome-associated protein ECM29-like {ECO:0000313|EMBL:JAP38191.1};	Uncharacterized conserved protein	GO:0000502,proteasome complex; GO:0032947,protein-containing complex scaffold activity; GO:0043248,proteasome assembly	PF12755.7:Vacuolar 14 Fab1-binding region
g11306	1.7	0	0	0	0.07	0	0	0	0	0	0	0	1.77	3.12	2.445	19	0	0	0	1	0	0	0	0	0	0	0	23	42	33	LG3	13891722	13892495	-	K23618 acyl-activating enzyme 11/12 [EC:6.2.1.2 6.2.1.-] | (RefSeq) butyrate--CoA ligase AAE11, peroxisomal-like (A)	--	PREDICTED: probable acyl-activating enzyme 5, peroxisomal [Ipomoea nil]	RecName: Full=Probable acyl-activating enzyme 6; EC=6.2.1.-; AltName: Full=AMP-binding protein 6; Short=AtAMPBP6;	SubName: Full=AMP-dependent synthetase/ligase {ECO:0000313|EMBL:OMO97428.1};	Acyl-CoA synthetase	GO:0016874,ligase activity; GO:0006631,fatty acid metabolic process	PF00501.28:AMP-binding enzyme
g11307	10.2	13.83	18.2	0.86	3.99	3.07	21.07	12.94	28.67	8.85	21.27	6.33	5.74	13.1	9.42	64	122	182	6	34	21	139	81	177	64	149	44	42	99	71	LG3	13894200	13895924	+	--	--	--	--	--	--	--	--
g11308	4.47	2.38	1.61	0.55	0.66	1.43	0.58	4.76	2.21	2.76	3.35	5.6	2.49	5.01	3.75	80	60	46	11	16	28	11	85	39	57	67	111	52	108	80	LG3	13912864	13914875	-	K05666 ATP-binding cassette, subfamily C (CFTR/MRP), member 2 | (RefSeq) ABC transporter C family member 10 (A)	ko02010: ABC transporters	ABC transporter C family member 3-like isoform X4 [Olea europaea var. sylvestris]	RecName: Full=ABC transporter C family member 6; Short=ABC transporter ABCC.6; Short=AtABCC6; EC=3.6.3.44; AltName: Full=ATP-energized glutathione S-conjugate pump 8; AltName: Full=Glutathione S-conjugate-transporting ATPase 8; AltName: Full=Multidrug resistance-associated protein 8;	SubName: Full=Multidrug resistance-associated protein/mitoxantrone resistance protein, ABC superfamily {ECO:0000313|EMBL:PIN10945.1}; EC=3.6.3.44 {ECO:0000313|EMBL:PIN10945.1};	Multidrug resistance-associated protein/mitoxantrone resistance protein, ABC superfamily	GO:0016021,integral component of membrane; GO:0000325,plant-type vacuole; GO:0009506,plasmodesma; GO:0005774,vacuolar membrane; GO:0005524,ATP binding; GO:0042626,ATPase activity, coupled to transmembrane movement of substances; GO:0008559,xenobiotic transmembrane transporting ATPase activity; GO:0055085,transmembrane transport	--
g11319	0.95	2.85	2.96	1.68	0.95	2.28	0.27	0.05	6.16	1.66	1.58	0	0.2	0.75	0.475	20	84	99	39	27	52	6	1	127	40	37	0	5	19	12	LG3	13991068	13993493	-	K00142 acyl-CoA synthetase [EC:6.2.1.-] | (RefSeq) putative acyl-activating enzyme 19 (A)	--	PREDICTED: putative acyl-activating enzyme 19 isoform X2 [Ipomoea nil]	RecName: Full=Putative acyl-activating enzyme 19;	SubName: Full=Uncharacterized protein {ECO:0000313|EMBL:KOM47875.1};	PQQ (pyrrolo-quinoline quinone) repeat protein	GO:0003824,catalytic activity; GO:0008152,metabolic process	--
g11330	1.8	2.34	3.58	13.54	10.68	11.2	12.69	15.32	13.14	2.46	2.71	1.87	2.08	2.45	2.265	75	137	237	624	603	508	555	636	538	118	126	86	101	123	112	LG3	14055494	14065123	-	K01114 phospholipase C [EC:3.1.4.3] | (RefSeq) non-specific phospholipase C2 (A)	ko00562: Inositol phosphate metabolism; ko00564: Glycerophospholipid metabolism; ko00565: Ether lipid metabolism	PREDICTED: non-specific phospholipase C2 [Ipomoea nil]	RecName: Full=Non-specific phospholipase C2; EC=3.1.-.-; Flags: Precursor;	SubName: Full=Uncharacterized protein {ECO:0000313|EnsemblPlants:PGSC0003DMT400058490};	--	GO:0005576,extracellular region; GO:0003993,acid phosphatase activity; GO:0009395,phospholipid catabolic process	PF04185.14:Phosphoesterase family
g11333	0	0	0	0.8	1.38	0	0	0	0	4.33	0.97	1.83	0	0	0	0	0	0	18	38	0	0	0	0	101	22	41	0	0	0	LG3	14083588	14087392	+	--	--	PREDICTED: transcription factor TCP8-like isoform X1 [Ipomoea nil]	--	SubName: Full=transcription factor TCP8-like {ECO:0000313|RefSeq:XP_009795828.1};	--	GO:0005634,nucleus; GO:0003677,DNA binding; GO:0006355,regulation of transcription, DNA-templated; GO:0006351,transcription, DNA-templated	--
g11334	0	0	0	1.2	0.55	1.3	0	0	0	0.94	3.28	7.36	0	0	0	0	0	0	16	9	17	0	0	0	13	44	98	0	0	0	LG3	14087958	14089072	+	--	--	--	--	--	--	--	--
g11335	26.77	35.97	40.94	36.34	24.17	48.03	20.17	35.24	38.36	44.01	44.52	57.97	98.78	81.14	89.96	374	706	911	562	458	731	296	491	527	708	694	896	1608	1365	1487	LG3	14089389	14091143	-	--	--	PREDICTED: uncharacterized protein LOC109160346 [Ipomoea nil]	--	SubName: Full=Uncharacterized protein {ECO:0000313|EnsemblPlants:PGSC0003DMT400058493};	--	GO:0004623,phospholipase A2 activity; GO:0050482,arachidonic acid secretion; GO:0006644,phospholipid metabolic process	--
g11341	17.83	21.05	8.42	23.22	16.97	26.11	18.84	16.26	9.82	34.33	28.8	40.69	31.52	23.03	27.275	299	496	225	431	386	477	332	272	162	663	539	755	616	465	541	LG3	14113368	14115956	+	--	--	PREDICTED: uncharacterized protein LOC109160224 [Ipomoea nil]	--	SubName: Full=Uncharacterized protein {ECO:0000313|EnsemblPlants:PGSC0003DMT400080266};	--	--	--
g11345	30.19	0.48	27.93	2.91	5.24	3.07	4.83	0	0	0	2.88	2.57	5.47	2.11	3.79	488	11	719	52	115	54	82	0	0	0	52	46	103	41	72	LG3	14122991	14124183	-	--	--	PREDICTED: F-box protein At4g18380-like [Ipomoea nil]	RecName: Full=F-box protein At5g46170;	SubName: Full=F-box protein At4g18380-like {ECO:0000313|RefSeq:XP_016435366.1};	--	GO:0009506,plasmodesma; GO:0009736,cytokinin-activated signaling pathway; GO:0010286,heat acclimation; GO:0009914,hormone transport	PF12937.7:F-box-like
g11359	1.07	0.81	0.93	0.13	1.36	0.64	2.67	3.18	2.32	0	0.69	6.77	0.19	0.15	0.17	29	31	40	4	50	19	76	86	62	0	21	203	6	5	6	LG3	14211280	14216777	-	K00844 hexokinase [EC:2.7.1.1] | (RefSeq) hexokinase-3-like (A)	ko00010: Glycolysis / Gluconeogenesis; ko00051: Fructose and mannose metabolism; ko00052: Galactose metabolism; ko00500: Starch and sucrose metabolism; ko00520: Amino sugar and nucleotide sugar metabolism; ko01200: Carbon metabolism	PREDICTED: hexokinase-3-like [Ipomoea nil]	RecName: Full=Hexokinase-3; EC=2.7.1.1;	RecName: Full=Phosphotransferase {ECO:0000256|RuleBase:RU362007}; EC=2.7.1.- {ECO:0000256|RuleBase:RU362007};	Hexokinase	GO:0005829,cytosol; GO:0031307,integral component of mitochondrial outer membrane; GO:0005739,mitochondrion; GO:0009536,plastid; GO:0005524,ATP binding; GO:0005536,glucose binding; GO:0019158,mannokinase activity; GO:0001678,cellular glucose homeostasis; GO:0006096,glycolytic process; GO:0009409,response to cold; GO:0006970,response to osmotic stress; GO:0009651,response to salt stress; GO:008014…	PF00349.21:Hexokinase
g11364	0	0	0	0	0.07	0	0	0	0	1.37	0.3	0	2.19	0.58	1.385	0	0	0	0	3	0	0	0	0	52	11	0	84	23	54	LG3	14266027	14273217	-	K17917 sorting nexin-1/2 | (RefSeq) sorting nexin 1-like (A)	ko04144: Endocytosis	PREDICTED: uncharacterized protein LOC109178647 [Ipomoea nil]	RecName: Full=Retrovirus-related Pol polyprotein from transposon RE1; AltName: Full=Retro element 1 {ECO:0000303|PubMed:10689195}; Short=AtRE1 {ECO:0000303|PubMed:10689195}; Includes: RecName: Full=Protease RE1; EC=3.4.23.-; Includes: RecName: Full=Reverse transcriptase RE1; EC=2.7.7.49; Includes: RecName: Full=Endonuclease RE1;	SubName: Full=Uncharacterized protein {ECO:0000313|EMBL:CAN67403.1};	FOG: Transposon-encoded proteins with TYA, reverse transcriptase, integrase domains in various combinations	GO:0004190,aspartic-type endopeptidase activity; GO:0004519,endonuclease activity; GO:0046872,metal ion binding; GO:0003676,nucleic acid binding; GO:0003964,RNA-directed DNA polymerase activity; GO:0015074,DNA integration; GO:0006310,DNA recombination	PF14223.6:gag-polypeptide of LTR copia-type
g1137	33.9	31.22	21.73	34.31	37.66	38.75	15.31	18.09	20.67	17.17	18.78	19.86	39.06	42.49	40.775	432	559	441	484	651	538	205	230	259	252	267	280	580	652	616	LG1	6807778	6811700	+	--	--	PREDICTED: methylesterase 10-like [Ipomoea nil]	RecName: Full=Methylesterase 10; Short=AtMES10; EC=3.1.1.-;	SubName: Full=Uncharacterized protein {ECO:0000313|EMBL:OAY33840.1};	--	GO:0016788,hydrolase activity, acting on ester bonds; GO:0080032,methyl jasmonate esterase activity	PF12697.7:Alpha/beta hydrolase family
g11377	4.31	2.78	0	3.32	1.59	0.81	7.29	2.4	0.08	2.91	1.57	1.88	2.67	10.41	6.54	54	49	0	46	27	11	96	30	1	42	22	26	39	157	98	LG3	14360731	14361670	-	--	--	--	--	--	--	--	--
g11378	1.91	2.89	0.99	1.9	2.05	2.37	2.71	1.54	5.12	5.81	5.54	4.37	2.21	2.11	2.16	101	214	83	111	147	136	150	81	266	353	326	255	136	134	135	LG3	14368585	14377275	+	K03678 exosome complex component RRP45 | (RefSeq) exosome complex component RRP45A-like (A)	ko03018: RNA degradation	PREDICTED: exosome complex component RRP45A-like isoform X1 [Ipomoea nil]	RecName: Full=Exosome complex component RRP45B {ECO:0000305}; AltName: Full=Protein ECERIFERUM 7 {ECO:0000303|PubMed:17351114}; AltName: Full=RNA-processing protein CER7; AltName: Full=RRP45 homolog B {ECO:0000305}; AltName: Full=Ribosomal RNA-processing protein 45B {ECO:0000305};	SubName: Full=Uncharacterized protein {ECO:0000313|EMBL:CDP15071.1};	Exosomal 3'-5' exoribonuclease complex, subunit Rrp45	GO:0005737,cytoplasm; GO:0000177,cytoplasmic exosome (RNase complex); GO:0000176,nuclear exosome (RNase complex); GO:0005634,nucleus; GO:0000175,3'-5'-exoribonuclease activity; GO:0017091,AU-rich element binding; GO:0043928,exonucleolytic nuclear-transcribed mRNA catabolic process involved in deadenylation-dependent decay; GO:0000467,exonucleolytic trimming to generate mature 3'-end of 5.8S rRNA …	PF01138.21:3' exoribonuclease family, domain 1
g11380	0	0	0	2.51	7.33	1.51	0	0	0	1.3	0.78	0.88	0.84	0.94	0.89	0	0	0	54	193	32	0	0	0	29	17	19	19	22	21	LG3	14396679	14402600	-	--	--	--	--	--	--	--	--
g11386	22.9	18.77	20.76	8.2	12.53	10.67	20.96	13.66	17.68	16.45	16.63	13.37	22.67	22.14	22.405	469	540	677	186	348	238	451	279	356	388	380	303	541	546	544	LG3	14435375	14439729	+	K00858 NAD+ kinase [EC:2.7.1.23] | (RefSeq) NAD(H) kinase 1 (A)	ko00760: Nicotinate and nicotinamide metabolism	PREDICTED: NAD(H) kinase 1 isoform X1 [Ipomoea nil]	RecName: Full=NAD(H) kinase 1; Short=AtNADK-1; EC=2.7.1.23; EC=2.7.1.86;	SubName: Full=Uncharacterized protein {ECO:0000313|EMBL:CDP09273.1};	Predicted sugar kinase	GO:0005524,ATP binding; GO:0003951,NAD+ kinase activity; GO:0042736,NADH kinase activity; GO:0019674,NAD metabolic process; GO:0006741,NADP biosynthetic process	PF01513.21:ATP-NAD kinase
g11388	0.05	0.11	1.45	1.63	0.74	1.84	0.05	0.1	0	0.79	0	0	0	0.5	0.25	1	3	46	36	20	40	1	2	0	18	0	0	0	12	6	LG3	14451745	14456135	+	K00858 NAD+ kinase [EC:2.7.1.23] | (RefSeq) NAD(H) kinase 1 (A)	ko00760: Nicotinate and nicotinamide metabolism	PREDICTED: NAD(H) kinase 1 isoform X2 [Ipomoea nil]	RecName: Full=NAD(H) kinase 1; Short=AtNADK-1; EC=2.7.1.23; EC=2.7.1.86;	SubName: Full=Uncharacterized protein {ECO:0000313|EMBL:CDP09273.1};	Predicted sugar kinase	GO:0005524,ATP binding; GO:0003951,NAD+ kinase activity; GO:0042736,NADH kinase activity; GO:0019674,NAD metabolic process; GO:0006741,NADP biosynthetic process	PF01513.21:ATP-NAD kinase
g11390	26.06	14.98	24.21	14.63	14.2	12.35	10.06	8.09	11.81	14.06	19.2	25.34	12.64	8.23	10.435	552	446	817	343	408	285	224	171	246	343	454	594	312	210	261	LG3	14464529	14468500	-	--	--	PREDICTED: protein RETICULATA-RELATED 4, chloroplastic-like [Ipomoea nil]	RecName: Full=Protein RETICULATA-RELATED 4, chloroplastic {ECO:0000303|PubMed:23596191}; Flags: Precursor;	SubName: Full=Uncharacterized protein {ECO:0000313|EMBL:EYU31377.1};	--	GO:0009507,chloroplast; GO:0009941,chloroplast envelope; GO:0009706,chloroplast inner membrane; GO:0016021,integral component of membrane; GO:0005739,mitochondrion; GO:0009536,plastid; GO:0007275,multicellular organism development	PF11891.8:Protein RETICULATA-related
g11393	3.61	2.74	0.47	16.34	15.04	18.55	6.16	9.56	4.31	7.02	8.16	5.74	11.41	9.74	10.575	92	98	19	461	520	515	165	243	108	206	232	162	339	299	319	LG3	14477954	14480070	-	K00522 ferritin heavy chain [EC:1.16.3.2] | (RefSeq) ferritin-2, chloroplastic-like (A)	--	PREDICTED: ferritin-2, chloroplastic-like isoform X2 [Ipomoea nil]	RecName: Full=Ferritin-2, chloroplastic; EC=1.16.3.1; AltName: Full=NtFer2; Flags: Precursor;	RecName: Full=Ferritin {ECO:0000256|RuleBase:RU361145}; EC=1.16.3.1 {ECO:0000256|RuleBase:RU361145};	Ferritin	GO:0009507,chloroplast; GO:0008199,ferric iron binding; GO:0004322,ferroxidase activity; GO:0006879,cellular iron ion homeostasis; GO:0006826,iron ion transport	PF00210.24:Ferritin-like domain
g11394	0.7	0.03	0.05	2.6	2.38	1.96	0	0	0	0	0	0.04	0	0	0	18	1	2	74	83	55	0	0	0	0	0	1	0	0	0	LG3	14480185	14485101	+	K11841 ubiquitin carboxyl-terminal hydrolase 10 [EC:3.4.19.12] | (RefSeq) ubiquitin carboxyl-terminal hydrolase 24-like (A)	--	PREDICTED: ubiquitin carboxyl-terminal hydrolase 24-like isoform X2 [Ipomoea nil]	RecName: Full=Ubiquitin carboxyl-terminal hydrolase 24; EC=3.4.19.12; AltName: Full=Deubiquitinating enzyme 24; Short=AtUBP24; AltName: Full=Ubiquitin thioesterase 24; AltName: Full=Ubiquitin-specific-processing protease 24;	SubName: Full=ubiquitin carboxyl-terminal hydrolase 24-like {ECO:0000313|RefSeq:XP_016465438.1};	Ubiquitin-specific protease	GO:0005634,nucleus; GO:0036459,thiol-dependent ubiquitinyl hydrolase activity; GO:0016579,protein deubiquitination; GO:0006511,ubiquitin-dependent protein catabolic process	PF00443.29:Ubiquitin carboxyl-terminal hydrolase
g1140	3.78	3.43	2.17	7.61	4.18	2.26	2.88	1.23	0.43	0	0	0	0.65	0.55	0.6	80	102	73	178	120	52	64	26	9	0	0	0	16	14	15	LG1	6820530	6822303	-	K20623 typhasterol/6-deoxotyphasterol 2alpha-hydroxylase | (RefSeq) cytochrome P450 71A1-like (A)	ko00905: Brassinosteroid biosynthesis	PREDICTED: geraniol 8-hydroxylase-like [Ipomoea nil]	RecName: Full=Geraniol 8-hydroxylase; EC=1.14.13.152; AltName: Full=Cytochrome P450 76B6; AltName: Full=Geraniol 10-hydroxylase; Short=CrG10H;	SubName: Full=Geraniol 10-hydroxylase-like protein {ECO:0000313|EMBL:AGX93052.1};	Cytochrome P450 CYP2 subfamily	GO:0005789,endoplasmic reticulum membrane; GO:0016021,integral component of membrane; GO:0102811,geraniol 10-hydroxylase activity; GO:0020037,heme binding; GO:0005506,iron ion binding; GO:0016709,oxidoreductase activity, acting on paired donors, with incorporation or reduction of molecular oxygen, NAD(P)H as one donor, and incorporation of one atom of oxygen; GO:0016099,monoterpenoid biosynthetic…	PF00067.22:Cytochrome P450
g11403	2.11	2.89	1.36	2.76	1.76	4.16	2.95	5.45	5.22	2.52	1.48	1.5	4.17	4.07	4.12	98	189	101	142	111	211	144	253	239	135	77	77	226	228	227	LG3	14572683	14577773	+	--	--	--	--	--	--	--	--
g11405	2.74	3.51	1.12	5.51	9.45	5.61	4.12	6.63	6.16	8.13	8.3	4.76	5.43	4.58	5.005	191	344	125	426	895	427	302	462	423	654	647	368	442	385	414	LG3	14593001	14602108	-	K00392 sulfite reductase (ferredoxin) [EC:1.8.7.1] | (RefSeq) sulfite reductase 1 [ferredoxin], chloroplastic-like (A)	ko00920: Sulfur metabolism	PREDICTED: sulfite reductase 1 [ferredoxin]	RecName: Full=Sulfite reductase 1 [ferredoxin], chloroplastic; Short=NtSiR1; EC=1.8.7.1; Flags: Precursor;	SubName: Full=Uncharacterized protein {ECO:0000313|EMBL:EYU46252.1};	Sulfite reductase (ferredoxin)	GO:0042644,chloroplast nucleoid; GO:0009570,chloroplast stroma; GO:0051539,4 iron, 4 sulfur cluster binding; GO:0003677,DNA binding; GO:0020037,heme binding; GO:0046872,metal ion binding; GO:0050311,sulfite reductase (ferredoxin) activity; GO:0006323,DNA packaging; GO:0045892,negative regulation of transcription, DNA-templated; GO:0006275,regulation of DNA replication; GO:0019424,sulfide oxidatio…	PF01077.22:Nitrite and sulphite reductase 4Fe-4S domain
g11407	5.45	6.26	2.53	12.17	20.18	15.08	9.34	10.91	6.21	16.06	14.65	21.11	17.15	18.31	17.73	256	413	189	633	1286	772	461	511	287	869	768	1097	939	1036	988	LG3	14614853	14619722	+	--	--	PREDICTED: FACT complex subunit SPT16-like [Ipomoea nil]	RecName: Full=FACT complex subunit SPT16; AltName: Full=Facilitates chromatin transcription complex subunit SPT16; AltName: Full=Global transcription factor group C protein 102;	SubName: Full=Fact complex subunit spt16 {ECO:0000313|EMBL:OIT00375.1};	Global transcriptional regulator, cell division control protein	GO:0005694,chromosome; GO:0005634,nucleus; GO:0006281,DNA repair; GO:0006260,DNA replication; GO:0006355,regulation of transcription, DNA-templated; GO:0006351,transcription, DNA-templated	PF08644.11:FACT complex subunit (SPT16/CDC68)
g11408	0	0	0	4.98	1.34	5.19	0	0.77	0	9.77	3.82	4.67	1.32	1.33	1.325	0	0	0	79	26	81	0	11	0	161	61	74	22	23	23	LG3	14623763	14626308	-	--	--	PREDICTED: uncharacterized protein LOC105957010 [Erythranthe guttata]	--	SubName: Full=Uncharacterized protein {ECO:0000313|EMBL:EMJ25732.1}; Flags: Fragment;	--	--	--
g11409	15.22	5.45	17.63	2.46	3.7	4.25	7.13	9.63	4.13	3.47	3.01	4.98	4.94	4.66	4.8	431	217	795	77	142	131	212	272	115	113	95	156	163	159	161	LG3	14627004	14632258	-	K13412 calcium-dependent protein kinase [EC:2.7.11.1] | (RefSeq) calcium-dependent protein kinase 7-like (A)	ko04626: Plant-pathogen interaction	PREDICTED: calcium-dependent protein kinase 7-like [Ipomoea nil]	RecName: Full=Calcium-dependent protein kinase 8; EC=2.7.11.1; AltName: Full=Calcium-dependent protein kinase isoform CDPK19; Short=AtCDPK19;	SubName: Full=calcium-dependent protein kinase 8-like {ECO:0000313|RefSeq:XP_016462311.1, ECO:0000313|RefSeq:XP_016462312.1};	Ca2+/calmodulin-dependent protein kinase, EF-Hand protein superfamily	GO:0005737,cytoplasm; GO:0005634,nucleus; GO:0005886,plasma membrane; GO:0005524,ATP binding; GO:0005509,calcium ion binding; GO:0009931,calcium-dependent protein serine/threonine kinase activity; GO:0005516,calmodulin binding; GO:0004683,calmodulin-dependent protein kinase activity; GO:0009738,abscisic acid-activated signaling pathway; GO:0035556,intracellular signal transduction; GO:0018105,pep…	PF00069.25:Protein kinase domain
g11413	23.12	32.49	23.32	20.88	19.01	23.09	24.86	17.57	20.49	19.61	11.1	9.39	24.21	23.35	23.78	476	940	765	476	531	518	538	361	415	465	255	214	581	579	580	LG3	14654467	14658248	-	K12898 heterogeneous nuclear ribonucleoprotein F/H | (RefSeq) heterogeneous nuclear ribonucleoprotein H2 (A)	--	PREDICTED: heterogeneous nuclear ribonucleoprotein F-like isoform X1 [Ipomoea nil]	--	SubName: Full=Uncharacterized protein {ECO:0000313|EnsemblPlants:PGSC0003DMT400018982};	Splicing factor hnRNP-F and related RNA-binding proteins	GO:0003723,RNA binding	PF00076.22:RNA recognition motif. (a.k.a. RRM, RBD, or RNP domain)
g11414	0	2.59	0	6.11	6.13	12.17	0	0	4.36	33.19	18.76	18.21	10.38	11.34	10.86	0	28	0	52	64	102	0	0	33	294	161	155	93	105	99	LG3	14659153	14659952	+	--	--	--	--	--	--	--	--
g11416	6.46	2.93	16.13	0.8	0	0.94	0	2.8	0	2.17	0	0	0	3.05	1.525	44	28	175	6	0	7	0	19	0	17	0	0	0	25	13	LG3	14666322	14666888	-	K17805 mitochondrial import inner membrane translocase subunit TIM16 | (RefSeq) mitochondrial import inner membrane translocase subunit PAM16 like 2-like (A)	--	PREDICTED: mitochondrial import inner membrane translocase subunit PAM16 like 2-like isoform X2 [Ipomoea nil]	RecName: Full=Mitochondrial import inner membrane translocase subunit PAM16 like 2 {ECO:0000303|PubMed:24194927}; Short=AtPAM16 {ECO:0000303|PubMed:24153405}; Short=AtPAM16L2 {ECO:0000303|PubMed:24194927}; AltName: Full=Presequence translocated-associated motor subunit PAM16 {ECO:0000250|UniProtKB:P42949}; AltName: Full=Protein MUTANT SNC1-ENHANCING 5 {ECO:0000303|PubMed:24153405}; AltName: Full=…	SubName: Full=mitochondrial import inner membrane translocase subunit Tim16-like isoform X3 {ECO:0000313|RefSeq:XP_009775691.1};	Uncharacterized conserved protein	GO:0005737,cytoplasm; GO:0005743,mitochondrial inner membrane; GO:0005744,TIM23 mitochondrial import inner membrane translocase complex; GO:0005739,mitochondrion; GO:0009734,auxin-activated signaling pathway; GO:0006952,defense response; GO:0031348,negative regulation of defense response; GO:1900425,negative regulation of defense response to bacterium; GO:1902289,negative regulation of defense re…	PF03656.13:Pam16
g11432	7.7	5.85	4.11	4.68	9.3	6.01	9.23	5.23	9.97	9.61	8.35	13.54	3.17	2.09	2.63	208	222	177	140	341	177	262	141	265	299	252	405	100	68	84	LG3	14733828	14737228	-	K03319 divalent anion:Na+ symporter, DASS family | (RefSeq) dicarboxylate transporter 2.1, chloroplastic-like (A)	--	PREDICTED: dicarboxylate transporter 1, chloroplastic-like [Ipomoea nil]	RecName: Full=Dicarboxylate transporter 1, chloroplastic; AltName: Full=2-oxoglutarate/malate translocator 1; Short=AtpOMT1; Flags: Precursor;	SubName: Full=dicarboxylate transporter 1, chloroplastic {ECO:0000313|RefSeq:XP_009777235.1};	--	GO:0009507,chloroplast; GO:0009941,chloroplast envelope; GO:0009706,chloroplast inner membrane; GO:0009534,chloroplast thylakoid; GO:0016021,integral component of membrane; GO:0016020,membrane; GO:0005739,mitochondrion; GO:0009536,plastid; GO:0015139,alpha-ketoglutarate transmembrane transporter activity; GO:0015140,malate transmembrane transporter activity; GO:0015131,oxaloacetate transmembrane …	PF00939.19:Sodium:sulfate symporter transmembrane region
g11435	4.63	6.73	7.07	4	6.08	1.75	2.01	5.04	0	8.47	13.25	6.18	2.16	3.51	2.835	46	94	112	44	82	19	21	50	0	97	147	68	25	42	34	LG3	14749888	14750658	-	--	--	--	--	--	--	--	--
g11454	0.32	1.19	1.33	0.98	1.63	1.1	3.62	0.02	2.74	4.97	2.7	3.86	0.97	1.09	1.03	14	74	94	48	98	53	168	1	119	253	133	189	50	58	54	LG3	14892005	14897130	+	K02212 DNA replication licensing factor MCM4 [EC:3.6.4.12] | (RefSeq) DNA replication licensing factor MCM4 (A)	ko03030: DNA replication	PREDICTED: DNA replication licensing factor MCM4 [Ipomoea nil]	RecName: Full=DNA replication licensing factor MCM4; EC=3.6.4.12; AltName: Full=Minichromosome maintenance protein 4; Short=OsMCM4;	RecName: Full=DNA helicase {ECO:0000256|SAAS:SAAS00536514}; EC=3.6.4.12 {ECO:0000256|SAAS:SAAS00536514};	DNA replication licensing factor, MCM4 component	GO:0005829,cytosol; GO:0042555,MCM complex; GO:0000347,THO complex; GO:0005524,ATP binding; GO:0003677,DNA binding; GO:0003678,DNA helicase activity; GO:0046872,metal ion binding; GO:0007049,cell cycle; GO:0006270,DNA replication initiation	PF00493.23:MCM P-loop domain
g11464	2.34	1.89	6.31	3.4	1.91	4.02	4.93	4.2	1.76	9.05	12.21	12.15	4.29	3.53	3.91	38	43	163	61	42	71	84	68	28	169	221	218	81	69	75	LG3	14971509	14976440	-	K19045 E3 ubiquitin-protein ligase BIG BROTHER and related proteins [EC:2.3.2.27] | (RefSeq) E3 ubiquitin ligase BIG BROTHER-like (A)	--	PREDICTED: E3 ubiquitin ligase BIG BROTHER-like isoform X1 [Ipomoea nil]	RecName: Full=E3 ubiquitin ligase BIG BROTHER; EC=2.3.2.27 {ECO:0000269|PubMed:16461280, ECO:0000269|PubMed:18483219}; AltName: Full=Protein ENHANCER OF DA1-1; AltName: Full=RING-type E3 ubiquitin transferase BIG BROTHER {ECO:0000305};	SubName: Full=E3 ubiquitin ligase big brother {ECO:0000313|EMBL:OIT27429.1};	FOG: Predicted E3 ubiquitin ligase	GO:0046872,metal ion binding; GO:0031624,ubiquitin conjugating enzyme binding; GO:0061630,ubiquitin protein ligase activity; GO:0004842,ubiquitin-protein transferase activity; GO:0048437,floral organ development; GO:0008285,negative regulation of cell proliferation; GO:0046621,negative regulation of organ growth; GO:1900057,positive regulation of leaf senescence; GO:0043161,proteasome-mediated ub…	PF13639.6:Ring finger domain
g11467	0	0.99	0	0.36	1.62	0	0.13	0	0	2.19	1.37	3	0	1.49	0.745	0	21	0	6	33	0	2	0	0	38	23	50	0	27	14	LG3	15020839	15025520	-	K13457 disease resistance protein RPM1 | (RefSeq) disease resistance protein RPM1-like (A)	ko04626: Plant-pathogen interaction	hypothetical protein BC332_25071 [Capsicum chinense]	RecName: Full=Putative disease resistance protein RGA1; AltName: Full=RGA3-blb;	SubName: Full=Uncharacterized protein {ECO:0000313|EMBL:PHU04249.1};	Apoptotic ATPase	GO:0043531,ADP binding; GO:0005524,ATP binding; GO:0006952,defense response	PF00931.22:NB-ARC domain
g11470	8.24	13.21	13.06	13.95	5.54	8	7.92	4.81	6.92	2.64	3.94	8.03	16.96	13.09	15.025	103	232	260	193	94	109	104	60	85	38	55	111	247	197	222	LG3	15053265	15054130	-	--	--	--	--	--	--	--	--
g11477	5.15	6.87	7.39	9.01	38	9.24	13.45	10.58	13.77	17.67	14.46	16.83	9.72	8.85	9.285	668	1252	1526	1293	6683	1305	1832	1368	1755	2638	2092	2414	1468	1381	1425	LG3	15108558	15128779	-	K11654 SWI/SNF-related matrix-associated actin-dependent regulator of chromatin subfamily A member 5 [EC:3.6.4.-] | (RefSeq) ISWI chromatin-remodeling complex ATPase CHR11 (A)	--	PREDICTED: chromatin structure-remodeling complex protein SYD isoform X2 [Ipomoea nil]	RecName: Full=Chromatin structure-remodeling complex protein SYD; EC=3.6.4.-; AltName: Full=ATP-dependent helicase SYD; AltName: Full=Protein CHROMATIN REMODELING 3; AltName: Full=Protein SPLAYED;	SubName: Full=chromatin structure-remodeling complex protein SYD-like isoform X3 {ECO:0000313|RefSeq:XP_016452514.1};	Chromatin remodeling complex SWI/SNF, component SWI2 and related ATPases (DNA/RNA helicase superfamily)	GO:0005829,cytosol; GO:0005634,nucleus; GO:0005524,ATP binding; GO:0016887,ATPase activity; GO:0003677,DNA binding; GO:0004386,helicase activity; GO:0042393,histone binding; GO:0043044,ATP-dependent chromatin remodeling; GO:0006952,defense response; GO:0009873,ethylene-activated signaling pathway; GO:0009908,flower development; GO:0010199,organ boundary specification between lateral organs and th…	PF14619.6:Snf2-ATP coupling, chromatin remodelling complex
g11478	1.24	1.06	0.96	1.5	10.87	2.11	3.41	2.98	3	2.68	0.71	2.05	1.16	2.02	1.59	55	66	68	74	655	102	159	132	131	137	35	101	60	108	84	LG3	15129698	15139399	-	--	--	PREDICTED: chromatin structure-remodeling complex protein SYD isoform X3 [Ipomoea nil]	RecName: Full=Chromatin structure-remodeling complex protein SYD; EC=3.6.4.-; AltName: Full=ATP-dependent helicase SYD; AltName: Full=Protein CHROMATIN REMODELING 3; AltName: Full=Protein SPLAYED;	SubName: Full=chromatin structure-remodeling complex protein SYD {ECO:0000313|RefSeq:XP_009804031.1, ECO:0000313|RefSeq:XP_009804032.1};	Chromatin remodeling complex SWI/SNF, component SWI2 and related ATPases (DNA/RNA helicase superfamily)	GO:0005829,cytosol; GO:0005634,nucleus; GO:0005524,ATP binding; GO:0016887,ATPase activity; GO:0003677,DNA binding; GO:0004386,helicase activity; GO:0042393,histone binding; GO:0043044,ATP-dependent chromatin remodeling; GO:0006952,defense response; GO:0009873,ethylene-activated signaling pathway; GO:0009908,flower development; GO:0010199,organ boundary specification between lateral organs and th…	--
g11493	8.15	12.15	9.37	41.18	30.31	55.19	35.72	35.42	35.06	74.24	52.46	73.17	25.54	23.85	24.695	345	723	632	1930	1741	2546	1589	1496	1460	3620	2479	3428	1260	1216	1238	LG3	15259544	15266412	+	K09955 uncharacterized protein | (RefSeq) uncharacterized LOC109160191 (A)	--	PREDICTED: uncharacterized protein LOC109160191 isoform X2 [Ipomoea nil]	--	SubName: Full=Uncharacterized protein {ECO:0000313|EMBL:OIS95788.1};	--	GO:0046556,alpha-L-arabinofuranosidase activity; GO:0046373,L-arabinose metabolic process	PF07944.12:Beta-L-arabinofuranosidase, GH127
g11494	3.68	4.28	1.4	17.5	24.36	19.33	5.67	8.84	3.85	21.2	17.91	22.71	0.94	1.97	1.455	144	235	87	758	1293	824	233	345	148	955	782	983	43	93	68	LG3	15271154	15275649	-	K09955 uncharacterized protein | (RefSeq) uncharacterized LOC109160191 (A)	--	PREDICTED: uncharacterized protein LOC109160191 isoform X1 [Ipomoea nil]	--	SubName: Full=uncharacterized protein LOC107764936 isoform X1 {ECO:0000313|RefSeq:XP_016439000.1};	--	GO:0046556,alpha-L-arabinofuranosidase activity; GO:0046373,L-arabinose metabolic process	PF07944.12:Beta-L-arabinofuranosidase, GH127
g11498	11.42	3.58	7.17	4.6	4.67	3.05	4.2	5.52	3.54	3.58	2.28	4.32	2.09	1.23	1.66	440	194	440	196	244	128	170	212	134	159	98	184	94	57	76	LG3	15291524	15294842	+	K08193 MFS transporter, ACS family, solute carrier family 17 (sodium-dependent inorganic phosphate cotransporter), other | (RefSeq) probable anion transporter 5 (A)	--	PREDICTED: probable anion transporter 5 [Ipomoea nil]	RecName: Full=Probable anion transporter 5; AltName: Full=Phosphate transporter PHT4;6; Flags: Precursor;	SubName: Full=Uncharacterized protein {ECO:0000313|EMBL:CDP04091.1};	Permease of the major facilitator superfamily	GO:0005794,Golgi apparatus; GO:0000139,Golgi membrane; GO:0016021,integral component of membrane; GO:0009536,plastid; GO:0005315,inorganic phosphate transmembrane transporter activity; GO:0098656,anion transmembrane transport; GO:0009624,response to nematode	PF07690.16:Major Facilitator Superfamily
g11506	36.73	31.39	29.16	18.27	16.21	15.89	9.79	14.15	7.61	10.96	20.01	19.26	16.72	22.72	19.72	643	772	813	354	385	303	180	247	131	221	391	373	341	479	410	LG3	15375784	15379320	+	--	--	PREDICTED: uncharacterized protein LOC109160370 [Ipomoea nil]	--	SubName: Full=Uncharacterized protein {ECO:0000313|EMBL:CDP17401.1};	--	--	--
g11515	2.66	1.46	4.76	1.88	2.2	3.24	1.17	2.57	1.19	6.04	6.98	8.31	1.93	2.16	2.045	134	103	382	105	150	178	62	129	59	350	392	463	113	131	122	LG3	15476079	15484955	+	K02212 DNA replication licensing factor MCM4 [EC:3.6.4.12] | (RefSeq) DNA replication licensing factor MCM4 (A)	ko03030: DNA replication	PREDICTED: DNA replication licensing factor MCM4 [Ipomoea nil]	RecName: Full=DNA replication licensing factor MCM4; EC=3.6.4.12; AltName: Full=Minichromosome maintenance protein 4; Short=OsMCM4;	RecName: Full=DNA helicase {ECO:0000256|SAAS:SAAS00536514}; EC=3.6.4.12 {ECO:0000256|SAAS:SAAS00536514};	DNA replication licensing factor, MCM4 component	GO:0005829,cytosol; GO:0042555,MCM complex; GO:0000347,THO complex; GO:0005524,ATP binding; GO:0003677,DNA binding; GO:0003678,DNA helicase activity; GO:0046872,metal ion binding; GO:0007049,cell cycle; GO:0006270,DNA replication initiation	PF00493.23:MCM P-loop domain
g11518	8.34	6.53	13.56	4.31	1.31	4.38	0	5.3	1.42	4.59	5.59	4.89	0.22	0.9	0.56	131	144	339	75	28	75	0	83	22	83	98	85	4	17	11	LG3	15504249	15507122	+	--	--	PREDICTED: flowering time control protein FCA-like isoform X2 [Ipomoea nil]	RecName: Full=Flowering time control protein FCA;	SubName: Full=flowering time control protein FCA {ECO:0000313|RefSeq:XP_016551584.1};	RNA-binding protein CUGBP1/BRUNO (RRM superfamily)	GO:0005634,nucleus; GO:0003723,RNA binding; GO:0030154,cell differentiation; GO:0009908,flower development	PF00397.26:WW domain
g1152	13.93	7.58	14.6	0	1.15	0.96	11.49	9.19	5.61	6.34	4.07	2.83	4.48	5.44	4.96	187	143	312	0	21	14	162	123	74	98	61	42	70	88	79	LG1	6882780	6884444	-	--	--	PREDICTED: methylesterase 3-like [Ipomoea nil]	RecName: Full=Methylesterase 3; Short=AtMES3; EC=3.1.1.-;	SubName: Full=Methyl jasmonate esterase {ECO:0000313|EMBL:AAV87151.1};	--	GO:0016788,hydrolase activity, acting on ester bonds; GO:0080030,methyl indole-3-acetate esterase activity; GO:0080032,methyl jasmonate esterase activity	PF12697.7:Alpha/beta hydrolase family
g11523	70.32	53.92	45.66	28.98	15.24	29.58	27.75	21.68	35.64	39.71	48.57	36.15	45.42	53.55	49.485	1990	2144	2058	908	585	912	825	612	992	1294	1534	1132	1498	1825	1662	LG3	15540992	15551584	-	K02997 small subunit ribosomal protein S9e | (RefSeq) 40S ribosomal protein S9-2-like (A)	ko03010: Ribosome	hypothetical protein EUGRSUZ_I01938 [Eucalyptus grandis]	RecName: Full=40S ribosomal protein S9-2;	SubName: Full=Uncharacterized protein {ECO:0000313|EMBL:KCW56188.1};	Ribosomal protein S4	GO:0005829,cytosol; GO:0022627,cytosolic small ribosomal subunit; GO:0016020,membrane; GO:0009506,plasmodesma; GO:0019843,rRNA binding; GO:0003735,structural constituent of ribosome; GO:0045903,positive regulation of translational fidelity; GO:0006412,translation	PF01479.25:S4 domain
g11534	4.94	3.6	3.99	1.95	0.91	1.3	0.12	0	0	1.18	0.66	0	0.11	2.66	1.385	80	82	103	35	20	23	2	0	0	22	12	0	2	52	27	LG3	15610755	15614745	+	K17805 mitochondrial import inner membrane translocase subunit TIM16 | (RefSeq) mitochondrial import inner membrane translocase subunit PAM16 like 2-like (A)	--	PREDICTED: mitochondrial import inner membrane translocase subunit PAM16 like 2-like isoform X2 [Ipomoea nil]	RecName: Full=Mitochondrial import inner membrane translocase subunit PAM16 like 2 {ECO:0000303|PubMed:24194927}; Short=AtPAM16 {ECO:0000303|PubMed:24153405}; Short=AtPAM16L2 {ECO:0000303|PubMed:24194927}; AltName: Full=Presequence translocated-associated motor subunit PAM16 {ECO:0000250|UniProtKB:P42949}; AltName: Full=Protein MUTANT SNC1-ENHANCING 5 {ECO:0000303|PubMed:24153405}; AltName: Full=…	SubName: Full=mitochondrial import inner membrane translocase subunit Tim16-like isoform X3 {ECO:0000313|RefSeq:XP_009775691.1};	Uncharacterized conserved protein	GO:0005737,cytoplasm; GO:0005743,mitochondrial inner membrane; GO:0005744,TIM23 mitochondrial import inner membrane translocase complex; GO:0005739,mitochondrion; GO:0009734,auxin-activated signaling pathway; GO:0006952,defense response; GO:0031348,negative regulation of defense response; GO:1900425,negative regulation of defense response to bacterium; GO:1902289,negative regulation of defense re…	PF03656.13:Pam16
g11536	1.4	1.09	0.02	1.7	0.9	1.31	0.43	4.09	5.93	0.03	0.13	0.19	1.92	1.42	1.67	40	44	1	54	35	41	13	117	167	1	4	6	64	49	57	LG3	15632176	15634160	-	K00820 glucosamine---fructose-6-phosphate aminotransferase (isomerizing) [EC:2.6.1.16] | (RefSeq) glutamine--fructose-6-phosphate aminotransferase [isomerizing] 2 (A)	ko00250: Alanine, aspartate and glutamate metabolism; ko00520: Amino sugar and nucleotide sugar metabolism	PREDICTED: DCN1-like protein 4 isoform X2 [Ipomoea nil]	RecName: Full=Glutamine--fructose-6-phosphate aminotransferase [isomerizing] {ECO:0000255|HAMAP-Rule:MF_00164}; EC=2.6.1.16 {ECO:0000255|HAMAP-Rule:MF_00164}; AltName: Full=D-fructose-6-phosphate amidotransferase {ECO:0000255|HAMAP-Rule:MF_00164}; AltName: Full=GFAT {ECO:0000255|HAMAP-Rule:MF_00164}; AltName: Full=Glucosamine-6-phosphate synthase {ECO:0000255|HAMAP-Rule:MF_00164}; AltName: Full=H…	SubName: Full=Uncharacterized protein {ECO:0000313|EMBL:KDO54021.1}; Flags: Fragment;	Glucosamine 6-phosphate synthetases, contain amidotransferase and phosphosugar isomerase domains	GO:0009507,chloroplast; GO:0097367,carbohydrate derivative binding; GO:0004360,glutamine-fructose-6-phosphate transaminase (isomerizing) activity; GO:1901137,carbohydrate derivative biosynthetic process; GO:0006541,glutamine metabolic process	--
g11537	6.04	7.3	3.44	2.16	4.3	2.24	12.66	18.88	12.23	0	0.96	0.83	0.61	0.67	0.64	119	202	108	47	115	48	262	371	237	0	21	18	14	16	15	LG3	15641505	15643735	+	K10277 lysine-specific demethylase 8 [EC:1.14.11.27] | (RefSeq) lysine-specific demethylase JMJ30-like (A)	--	PREDICTED: lysine-specific demethylase JMJ30-like [Ipomoea nil]	RecName: Full=Lysine-specific demethylase JMJ30 {ECO:0000303|PubMed:18713399}; Short=AtJMJ30 {ECO:0000303|PubMed:18713399}; EC=1.14.11.-; AltName: Full=JmjC domain-containing protein 30 {ECO:0000303|PubMed:18713399}; AltName: Full=Jumonji domain-containing protein 5 {ECO:0000303|PubMed:21115819}; Short=AtJMJD5 {ECO:0000303|PubMed:21115819};	SubName: Full=putative lysine-specific demethylase JMJD5 {ECO:0000313|RefSeq:XP_009776990.1};	Uncharacterized conserved protein, contains JmjC domain	GO:0005737,cytoplasm; GO:0005634,nucleus; GO:0051213,dioxygenase activity; GO:0003700,DNA-binding transcription factor activity; GO:0046975,histone methyltransferase activity (H3-K36 specific); GO:0046872,metal ion binding; GO:0007623,circadian rhythm; GO:0009908,flower development; GO:0070544,histone H3-K36 demethylation; GO:0042752,regulation of circadian rhythm	PF13621.6:Cupin-like domain
g11545	0	0	0	0.05	1.29	0.39	0.52	0	0.64	0.3	0.13	0.41	0	0.3	0.15	0	0	0	6	183	44	57	0	66	36	15	47	0	38	19	LG3	15701415	15712160	-	K10526 OPC-8:0 CoA ligase 1 [EC:6.2.1.-] | (RefSeq) 4-coumarate--CoA ligase-like 5 (A)	ko00592: alpha-Linolenic acid metabolism	4-coumarate--coa ligase-like 1 [Nicotiana attenuata]	RecName: Full=4-coumarate--CoA ligase-like 1; EC=6.2.1.-;	SubName: Full=Uncharacterized protein {ECO:0000313|EnsemblPlants:PGSC0003DMT400055104};	Predicted AMP-binding protein	GO:0005777,peroxisome; GO:0005524,ATP binding; GO:0004321,fatty-acyl-CoA synthase activity; GO:0016874,ligase activity; GO:0009695,jasmonic acid biosynthetic process	PF00501.28:AMP-binding enzyme
g11547	121.2	101.32	148.86	75.66	11.99	61.94	56.63	46.82	39.44	68.74	86.39	55.95	64.37	60.8	62.585	1609	1890	3148	1112	216	896	790	620	515	1051	1280	822	996	972	984	LG3	15745105	15749090	-	K02929 large subunit ribosomal protein L44e | (RefSeq) 60S ribosomal protein L44-like (A)	ko03010: Ribosome	PREDICTED: 60S ribosomal protein L44-like [Gossypium arboreum]	RecName: Full=60S ribosomal protein L44;	SubName: Full=60S ribosomal L44 {ECO:0000313|EMBL:KHG28366.1};	60S ribosomal protein L44	GO:0005840,ribosome; GO:0003735,structural constituent of ribosome; GO:0006412,translation	PF00935.19:Ribosomal protein L44
g11550	0.73	4.5	7.72	4.87	5.76	6.18	2.92	2.18	3.38	6.93	6.44	5.94	1.64	0.66	1.15	23	198	385	169	245	211	96	68	104	250	225	206	60	25	43	LG3	15783093	15792572	-	K03167 DNA topoisomerase VI subunit B [EC:5.99.1.3] | (RefSeq) DNA topoisomerase 6 subunit B (A)	--	PREDICTED: DNA topoisomerase 6 subunit B isoform X1 [Ipomoea nil]	RecName: Full=DNA topoisomerase 6 subunit B {ECO:0000255|HAMAP-Rule:MF_03165}; Short=AtTOP6B; EC=5.99.1.3 {ECO:0000255|HAMAP-Rule:MF_03165}; AltName: Full=Protein BRASSINOSTEROID INSENSITIVE 3; AltName: Full=Protein ELONGATED HYPOCOTYL 6; AltName: Full=Protein ROOT HAIRLESS 3;	RecName: Full=DNA topoisomerase 6 subunit B {ECO:0000256|HAMAP-Rule:MF_03165}; EC=5.99.1.3 {ECO:0000256|HAMAP-Rule:MF_03165};	--	GO:0005829,cytosol; GO:0009330,DNA topoisomerase complex (ATP-hydrolyzing); GO:0005634,nucleus; GO:0015935,small ribosomal subunit; GO:0005524,ATP binding; GO:0003677,DNA binding; GO:0003918,DNA topoisomerase type II (ATP-hydrolyzing) activity; GO:0042802,identical protein binding; GO:0042803,protein homodimerization activity; GO:0003735,structural constituent of ribosome; GO:0000902,cell morphog…	PF09239.11:Topoisomerase VI B subunit, transducer
g11555	0.25	0.72	0	0.41	0.95	1.7	2.53	2.34	0.72	0	0.27	0.02	0.67	1.2	0.935	10	40	0	18	51	73	105	92	28	0	12	1	31	57	44	LG3	15827340	15830072	-	K13418 somatic embryogenesis receptor kinase 1 [EC:2.7.10.1 2.7.11.1] | (RefSeq) somatic embryogenesis receptor kinase 2 (A)	--	PREDICTED: G-type lectin S-receptor-like serine/threonine-protein kinase RLK1 [Ipomoea nil]	RecName: Full=G-type lectin S-receptor-like serine/threonine-protein kinase RLK1; EC=2.7.11.1; AltName: Full=Receptor-like protein kinase 1; Flags: Precursor;	SubName: Full=Uncharacterized protein {ECO:0000313|EMBL:PHU29469.1};	--	GO:0016021,integral component of membrane; GO:0005886,plasma membrane; GO:0005524,ATP binding; GO:0005516,calmodulin binding; GO:0030246,carbohydrate binding; GO:0004674,protein serine/threonine kinase activity; GO:0006468,protein phosphorylation	PF00069.25:Protein kinase domain
g11556	0.03	0	0	3	2.88	4.31	0.4	1.27	2.89	1.15	2.7	1.88	7.58	6.31	6.945	1	0	0	118	139	167	15	45	101	47	107	74	314	270	292	LG3	15833331	15835932	-	K13416 brassinosteroid insensitive 1-associated receptor kinase 1 [EC:2.7.10.1 2.7.11.1] | (RefSeq) BRASSINOSTEROID INSENSITIVE 1-associated receptor kinase 1-like (A)	ko04016: MAPK signaling pathway - plant; ko04075: Plant hormone signal transduction; ko04626: Plant-pathogen interaction	PREDICTED: G-type lectin S-receptor-like serine/threonine-protein kinase RLK1 [Ipomoea nil]	RecName: Full=G-type lectin S-receptor-like serine/threonine-protein kinase RLK1; EC=2.7.11.1; AltName: Full=Receptor-like protein kinase 1; Flags: Precursor;	SubName: Full=Serine/threonine-protein kinase {ECO:0000313|EnsemblPlants:Solyc01g006520.2.1};	--	GO:0016021,integral component of membrane; GO:0005886,plasma membrane; GO:0005524,ATP binding; GO:0005516,calmodulin binding; GO:0030246,carbohydrate binding; GO:0004674,protein serine/threonine kinase activity; GO:0006468,protein phosphorylation	PF00069.25:Protein kinase domain
g11557	2.47	1.51	1.29	8.5	6.59	9.69	5.05	3.82	6.37	5.74	6.49	8.99	5	4.23	4.615	129	111	107	491	467	551	277	199	327	345	378	519	304	266	285	LG3	15842578	15847962	-	K13416 brassinosteroid insensitive 1-associated receptor kinase 1 [EC:2.7.10.1 2.7.11.1] | (RefSeq) BRASSINOSTEROID INSENSITIVE 1-associated receptor kinase 1-like (A)	ko04016: MAPK signaling pathway - plant; ko04075: Plant hormone signal transduction; ko04626: Plant-pathogen interaction	PREDICTED: G-type lectin S-receptor-like serine/threonine-protein kinase RLK1 [Ipomoea nil]	RecName: Full=G-type lectin S-receptor-like serine/threonine-protein kinase RLK1; EC=2.7.11.1; AltName: Full=Receptor-like protein kinase 1; Flags: Precursor;	SubName: Full=Uncharacterized protein {ECO:0000313|EMBL:PHU29469.1};	--	GO:0016021,integral component of membrane; GO:0005886,plasma membrane; GO:0005524,ATP binding; GO:0005516,calmodulin binding; GO:0030246,carbohydrate binding; GO:0004674,protein serine/threonine kinase activity; GO:0006468,protein phosphorylation	PF00069.25:Protein kinase domain
g11559	7.76	6.32	6.77	19.56	14.99	17.51	15.11	13.59	26.2	12.36	13.95	16.58	13.17	11.56	12.365	277	317	385	773	726	681	567	484	920	508	556	655	548	497	523	LG3	15856581	15859222	-	K13416 brassinosteroid insensitive 1-associated receptor kinase 1 [EC:2.7.10.1 2.7.11.1] | (RefSeq) BRASSINOSTEROID INSENSITIVE 1-associated receptor kinase 1-like (A)	ko04016: MAPK signaling pathway - plant; ko04075: Plant hormone signal transduction; ko04626: Plant-pathogen interaction	PREDICTED: G-type lectin S-receptor-like serine/threonine-protein kinase RLK1 [Ipomoea nil]	RecName: Full=G-type lectin S-receptor-like serine/threonine-protein kinase RLK1; EC=2.7.11.1; AltName: Full=Receptor-like protein kinase 1; Flags: Precursor;	SubName: Full=G-type lectin s-receptor-like serinethreonine-protein kinase rlk1 {ECO:0000313|EMBL:OIT22796.1};	--	GO:0016021,integral component of membrane; GO:0005886,plasma membrane; GO:0005524,ATP binding; GO:0005516,calmodulin binding; GO:0030246,carbohydrate binding; GO:0004674,protein serine/threonine kinase activity; GO:0006468,protein phosphorylation	PF00069.25:Protein kinase domain
g11561	0.94	0.39	1.94	0	0.1	0	0.85	0.84	1.3	0	0.3	0.54	0.02	0.3	0.16	36	21	118	0	5	0	34	32	49	0	13	23	1	14	8	LG3	15869357	15872005	+	K13418 somatic embryogenesis receptor kinase 1 [EC:2.7.10.1 2.7.11.1] | (RefSeq) somatic embryogenesis receptor kinase 2 (A)	--	PREDICTED: G-type lectin S-receptor-like serine/threonine-protein kinase RLK1 [Ipomoea nil]	RecName: Full=G-type lectin S-receptor-like serine/threonine-protein kinase RLK1; EC=2.7.11.1; AltName: Full=Receptor-like protein kinase 1; Flags: Precursor;	SubName: Full=Uncharacterized protein {ECO:0000313|EMBL:PHU29469.1};	--	GO:0016021,integral component of membrane; GO:0005886,plasma membrane; GO:0005524,ATP binding; GO:0005516,calmodulin binding; GO:0030246,carbohydrate binding; GO:0004674,protein serine/threonine kinase activity; GO:0006468,protein phosphorylation	PF00069.25:Protein kinase domain
g11562	1.1	3.21	1.7	6.62	11.27	5.86	3.77	1.57	6.62	6.81	10.11	2.37	1.72	2.64	2.18	28	115	69	187	390	163	101	40	166	200	288	67	51	81	66	LG3	15876417	15884600	+	K14406 cleavage stimulation factor subunit 1 | (RefSeq) cleavage stimulation factor subunit 50 (A)	ko03015: mRNA surveillance pathway	PREDICTED: cleavage stimulation factor subunit 50 [Ipomoea nil]	RecName: Full=Cleavage stimulation factor subunit 50 {ECO:0000303|PubMed:12379796}; Short=AtCstF-50 {ECO:0000303|PubMed:12379796}; Short=AtCstF50 {ECO:0000303|PubMed:16282318}; AltName: Full=CF-1 50 kDa subunit {ECO:0000305}; AltName: Full=Cleavage stimulation factor 50 kDa subunit {ECO:0000305}; Short=CSTF 50 kDa subunit {ECO:0000305};	SubName: Full=cleavage stimulation factor subunit 50-like isoform X1 {ECO:0000313|RefSeq:XP_016455608.1};	mRNA cleavage stimulating factor complex; subunit 1	GO:0005634,nucleus; GO:0006397,mRNA processing	PF00400.32:WD domain, G-beta repeat
g11563	2.76	1.02	3.2	0.02	0.32	0.04	2.97	5.38	4.54	0.34	0	1.26	2.01	0.61	1.31	113	59	209	1	18	2	128	220	183	16	0	57	96	30	63	LG3	15886539	15890252	-	K13418 somatic embryogenesis receptor kinase 1 [EC:2.7.10.1 2.7.11.1] | (RefSeq) somatic embryogenesis receptor kinase 2 (A)	--	PREDICTED: G-type lectin S-receptor-like serine/threonine-protein kinase RLK1 [Ipomoea nil]	RecName: Full=G-type lectin S-receptor-like serine/threonine-protein kinase RLK1; EC=2.7.11.1; AltName: Full=Receptor-like protein kinase 1; Flags: Precursor;	SubName: Full=Uncharacterized protein {ECO:0000313|EMBL:PHU29469.1};	--	GO:0016021,integral component of membrane; GO:0005886,plasma membrane; GO:0005524,ATP binding; GO:0005516,calmodulin binding; GO:0030246,carbohydrate binding; GO:0004674,protein serine/threonine kinase activity; GO:0006468,protein phosphorylation	PF00069.25:Protein kinase domain
g11565	20.04	18.39	24.1	11.87	6.93	7.21	27.95	17.07	16.12	14.98	15.85	5.44	9.32	13.23	11.275	273	352	523	179	128	107	400	232	216	235	241	82	148	217	183	LG3	15904411	15907022	-	K02989 small subunit ribosomal protein S5e | (RefSeq) 40S ribosomal protein S5 (A)	ko03010: Ribosome	PREDICTED: 40S ribosomal protein S5 isoform X1 [Ipomoea nil]	RecName: Full=40S ribosomal protein S5-2;	SubName: Full=40S ribosomal protein S5 {ECO:0000313|RefSeq:XP_009782596.1};	Ribosomal protein S7	GO:0005618,cell wall; GO:0009507,chloroplast; GO:0022626,cytosolic ribosome; GO:0022627,cytosolic small ribosomal subunit; GO:0005886,plasma membrane; GO:0009506,plasmodesma; GO:0005773,vacuole; GO:0003729,mRNA binding; GO:0019843,rRNA binding; GO:0003735,structural constituent of ribosome; GO:0000028,ribosomal small subunit assembly; GO:0006412,translation	PF00177.21:Ribosomal protein S7p/S5e
g11567	1.66	6.72	3.68	1.46	0.55	1.41	5.3	5.25	4.78	1.8	0.86	0	8.56	3.52	6.04	40	227	141	39	18	37	134	126	113	50	23	0	240	102	171	LG3	15910197	15913345	+	--	--	PREDICTED: non-structural maintenance of chromosomes element 4 homolog A-like [Ipomoea nil]	RecName: Full=Non-structural maintenance of chromosomes element 4 homolog A; Short=Non-SMC element 4 homolog A;	SubName: Full=non-structural maintenance of chromosomes element 4 homolog A-like isoform X1 {ECO:0000313|RefSeq:XP_018834640.1};	Uncharacterized conserved protein	GO:0005634,nucleus; GO:0030915,Smc5-Smc6 complex; GO:0006310,DNA recombination; GO:0006281,DNA repair	PF08743.10:Nse4 C-terminal
g11568	20.55	46.53	30.82	30.78	23.37	37.95	21.57	14.41	23.86	42.06	30.21	23.11	12.55	19.82	16.185	409	1301	977	678	631	823	451	286	467	964	671	509	291	475	383	LG3	15914867	15920495	+	K00208 enoyl-[acyl-carrier protein] reductase I [EC:1.3.1.9 1.3.1.10] | (RefSeq) enoyl-[acyl-carrier-protein] reductase [NADH], chloroplastic-like (A)	ko00061: Fatty acid biosynthesis; ko00780: Biotin metabolism; ko01212: Fatty acid metabolism	PREDICTED: enoyl-[acyl-carrier-protein]	RecName: Full=Enoyl-[acyl-carrier-protein] reductase [NADH], chloroplastic; Short=ENR; EC=1.3.1.9; AltName: Full=NADH-dependent enoyl-ACP reductase 1; AltName: Full=Protein MOSAIC DEATH 1; Flags: Precursor;	SubName: Full=enoyl-[acyl-carrier-protein] reductase [NADH], chloroplastic-like {ECO:0000313|RefSeq:XP_016489562.1};	Reductases with broad range of substrate specificities	GO:0009507,chloroplast; GO:0009941,chloroplast envelope; GO:0009570,chloroplast stroma; GO:0005835,fatty acid synthase complex; GO:0009579,thylakoid; GO:0005507,copper ion binding; GO:0004318,enoyl-[acyl-carrier-protein] reductase (NADH) activity; GO:0016631,enoyl-[acyl-carrier-protein] reductase activity; GO:0006633,fatty acid biosynthetic process	PF13561.6:Enoyl-(Acyl carrier protein) reductase
g11575	0.7	0	0	0.39	0.66	0.23	0	0.29	0	0	0	0	0.42	0.37	0.395	36	0	0	22	46	13	0	15	0	0	0	0	25	23	24	LG3	15960360	15964660	-	K13420 LRR receptor-like serine/threonine-protein kinase FLS2 [EC:2.7.11.1] | (RefSeq) probable LRR receptor-like serine/threonine-protein kinase At3g47570 (A)	ko04016: MAPK signaling pathway - plant; ko04626: Plant-pathogen interaction	PREDICTED: LRR receptor-like serine/threonine-protein kinase GSO1 [Ipomoea nil]	RecName: Full=Receptor-like protein Cf-9 homolog {ECO:0000305}; Flags: Precursor;	SubName: Full=Uncharacterized protein {ECO:0000313|EnsemblPlants:PGSC0003DMT400036087};	--	GO:0016021,integral component of membrane; GO:0005886,plasma membrane	PF13855.6:Leucine rich repeat
g11587	1.95	4.41	3.48	2.95	8.85	4.21	2.86	6.73	6.64	2.49	3.12	3.52	9.54	3.93	6.735	53	169	151	89	327	125	82	183	178	78	95	106	303	129	216	LG3	16015495	16017382	+	K11982 E3 ubiquitin-protein ligase RNF115/126 [EC:2.3.2.27] | (RefSeq) E3 ubiquitin-protein ligase RDUF2-like (A)	--	PREDICTED: E3 ubiquitin-protein ligase RNF149-like [Ipomoea nil]	RecName: Full=E3 ubiquitin-protein ligase RING1; EC=2.3.2.27; AltName: Full=RING finger protein 1; AltName: Full=RING-type E3 ubiquitin transferase RING1 {ECO:0000305};	SubName: Full=putative RING-H2 finger protein ATL71 {ECO:0000313|RefSeq:XP_016438740.1};	FOG: Predicted E3 ubiquitin ligase	GO:0046872,metal ion binding; GO:0004842,ubiquitin-protein transferase activity; GO:0090378,seed trichome elongation	PF13639.6:Ring finger domain
g1159	0	0.06	0	0.5	0.23	0	4.05	9.47	18.25	8.27	9.17	7.97	0	0.07	0.035	0	1	0	7	4	0	54	120	228	121	130	112	0	1	1	LG1	6926291	6927884	-	--	--	PREDICTED: methylesterase 3-like [Ipomoea nil]	RecName: Full=Methylesterase 3; Short=AtMES3; EC=3.1.1.-;	SubName: Full=Methyl jasmonate esterase {ECO:0000313|EMBL:AAV87151.1};	--	GO:0016788,hydrolase activity, acting on ester bonds; GO:0080030,methyl indole-3-acetate esterase activity; GO:0080032,methyl jasmonate esterase activity	PF12697.7:Alpha/beta hydrolase family
g11593	0	1.3	0.03	1.68	1.47	1.09	8.67	7.73	8.31	6.58	6.76	7.58	2.04	2.08	2.06	0	43	1	44	47	28	215	182	193	179	178	198	56	59	58	LG3	16040825	16045608	+	--	--	PREDICTED: metal tolerance protein 4-like [Ipomoea nil]	RecName: Full=Metal tolerance protein 4; Short=OsMTP4;	SubName: Full=metal tolerance protein 4-like isoform X1 {ECO:0000313|RefSeq:XP_016508151.1};	Mitochondrial Fe2+ transporter MMT1 and related transporters (cation diffusion facilitator superfamily)	GO:0016021,integral component of membrane; GO:0005774,vacuolar membrane; GO:0008324,cation transmembrane transporter activity	PF01545.21:Cation efflux family
g11594	121.42	10.36	91.11	5.9	3.09	0.26	1.01	2.42	1.23	9.56	10.88	6.35	3.66	3.01	3.335	1710	205	2044	92	59	4	15	34	17	155	171	99	60	51	56	LG3	16047852	16051450	-	--	--	PREDICTED: dirigent protein 22-like [Ipomoea nil]	RecName: Full=Dirigent protein 20; Short=AtDIR20; Flags: Precursor;	RecName: Full=Dirigent protein {ECO:0000256|RuleBase:RU363099};	--	GO:0048046,apoplast; GO:0016853,isomerase activity	PF03018.14:Dirigent-like protein
g11598	0	0	0	1.25	0.87	1.21	0	0	0	0	0	0	0	0.82	0.41	0	0	0	21	18	20	0	0	0	0	0	0	0	15	8	LG3	16093115	16094165	+	--	--	PREDICTED: uncharacterized protein LOC109159983 isoform X1 [Ipomoea nil]	--	SubName: Full=transmembrane protein 45B-like {ECO:0000313|RefSeq:XP_016459788.1};	--	GO:0016021,integral component of membrane	PF04819.12:Family of unknown function (DUF716)
g11599	0	0	1.67	5.2	6.24	3.84	1.39	0	0	0.09	0.75	1.13	0	0.17	0.085	0	0	51	110	162	80	28	0	0	2	16	24	0	4	2	LG3	16100116	16101440	-	--	--	PREDICTED: transmembrane protein 45B-like [Ipomoea nil]	--	SubName: Full=Putative transmembrane epididymal protein 1-like {ECO:0000313|EMBL:JAP23250.1};	--	GO:0016021,integral component of membrane	PF04819.12:Family of unknown function (DUF716)
g1160	0.78	1.34	0.02	1.14	2.4	1.98	0.41	2.89	4.57	9.65	7.04	5.81	2.91	3.93	3.42	29	70	1	47	121	80	16	107	167	413	292	239	126	176	151	LG1	6929429	6932285	+	K03452 magnesium/proton exchanger | (RefSeq) pentatricopeptide repeat-containing protein At3g62890-like (A)	--	PREDICTED: pentatricopeptide repeat-containing protein At3g50420 [Ipomoea nil]	RecName: Full=Pentatricopeptide repeat-containing protein At3g50420;	SubName: Full=Uncharacterized protein {ECO:0000313|EMBL:CDP02452.1};	FOG: PPR repeat	GO:0043231,intracellular membrane-bounded organelle; GO:0004519,endonuclease activity; GO:0003723,RNA binding; GO:0009451,RNA modification	PF13041.6:PPR repeat family
g11602	18.75	1.01	15.61	2.2	3.67	3.59	0	0	1.87	1.29	5.58	5.95	2.24	1.63	1.935	316	24	419	41	84	66	0	0	31	25	105	111	44	33	39	LG3	16124522	16125689	+	--	--	PREDICTED: transmembrane protein 45A-like [Ipomoea nil]	--	SubName: Full=transmembrane protein 45A-like {ECO:0000313|RefSeq:XP_016435312.1};	--	GO:0016021,integral component of membrane	PF04819.12:Family of unknown function (DUF716)
g11605	8.26	11.61	9.13	6.44	11.57	7.09	23.69	18.03	23.88	24.45	22.39	25.07	20.24	13.24	16.74	402	794	708	347	764	376	1211	875	1143	1370	1216	1350	1148	776	962	LG3	16146345	16156067	-	K10696 E3 ubiquitin-protein ligase BRE1 [EC:2.3.2.27] | (RefSeq) E3 ubiquitin-protein ligase BRE1-like 2 (A)	--	PREDICTED: E3 ubiquitin-protein ligase BRE1-like 2 isoform X1 [Ipomoea nil]	RecName: Full=E3 ubiquitin-protein ligase BRE1-like 2; EC=2.3.2.27 {ECO:0000269|PubMed:17329563}; AltName: Full=Protein HISTONE MONOUBIQUITINATION 2; Short=AtHUB2; AltName: Full=RING-type E3 ubiquitin transferase BRE1-like 2 {ECO:0000305};	SubName: Full=E3 ubiquitin-protein ligase bre1-like 2 {ECO:0000313|EMBL:OIT05160.1};	E3 ubiquitin ligase involved in syntaxin degradation	GO:0005634,nucleus; GO:0046872,metal ion binding; GO:0042803,protein homodimerization activity; GO:0004842,ubiquitin-protein transferase activity; GO:0033523,histone H2B ubiquitination; GO:0010390,histone monoubiquitination; GO:0045087,innate immune response; GO:0009965,leaf morphogenesis; GO:0010162,seed dormancy process; GO:0010228,vegetative to reproductive phase transition of meristem	PF13920.6:Zinc finger, C3HC4 type (RING finger)
g11607	4.11	5.21	6.39	3.9	9.81	2.93	4.65	8.23	12.65	9.07	9.31	5.03	2.34	3.59	2.965	175	312	434	184	567	136	208	350	530	445	443	237	116	184	150	LG3	16168883	16176467	-	K13095 splicing factor 1 | (RefSeq) splicing factor 1 (A)	--	PREDICTED: splicing factor 1 isoform X1 [Ipomoea nil]	RecName: Full=Splicing factor-like protein 1 {ECO:0000303|PubMed:24580679}; Short=AtSF1 {ECO:0000303|PubMed:24580679}; Short=SF1 homolog protein {ECO:0000303|PubMed:24580679};	SubName: Full=Extensin {ECO:0000313|EMBL:OIT05158.1};	Splicing factor 1/branch point binding protein (RRM superfamily)	GO:0005634,nucleus; GO:0005681,spliceosomal complex; GO:0003723,RNA binding; GO:0008270,zinc ion binding; GO:0009738,abscisic acid-activated signaling pathway; GO:0006397,mRNA processing; GO:0009737,response to abscisic acid; GO:0008380,RNA splicing	PF16275.5:Splicing factor 1 helix-hairpin domain
g1161	0.88	1.6	0	1.65	5.37	2.35	3.16	5.43	7.72	6.1	4.82	8.35	1.24	2.92	2.08	23	59	0	48	191	67	87	142	199	184	141	242	38	92	65	LG1	6932414	6935604	-	K14307 nucleoporin p58/p45 | (RefSeq) nuclear pore complex protein NUP58 (A)	ko03013: RNA transport	PREDICTED: nuclear pore complex protein NUP58 isoform X2 [Ipomoea nil]	RecName: Full=Nuclear pore complex protein NUP58 {ECO:0000303|PubMed:21189294}; AltName: Full=Nucleoporin 58; AltName: Full=Protein TRANSCURVATA1 {ECO:0000303|PubMed:23840761};	SubName: Full=Uncharacterized protein {ECO:0000313|EnsemblPlants:PGSC0003DMT400026136};	--	GO:0005635,nuclear envelope; GO:0005643,nuclear pore; GO:0008139,nuclear localization sequence binding; GO:0005487,NA; GO:0051028,mRNA transport; GO:0006606,protein import into nucleus	PF15967.5:Nucleoporin FG repeated region
g11613	31.73	9.85	29.74	3.09	0.63	1.64	0.74	6.16	11.78	0.47	1.74	0	0.4	3.81	2.105	408	178	609	44	11	23	10	79	149	7	25	0	6	59	33	LG3	16232572	16234393	+	--	--	PREDICTED: protein YLS3-like [Ipomoea nil]	RecName: Full=Protein YLS3; AltName: Full=Protein YELLOW-LEAF-SPECIFIC GENE 3; AltName: Full=Xylogen-like protein 9; Short=AtXYLP9; Flags: Precursor;	SubName: Full=Uncharacterized protein {ECO:0000313|EMBL:KDP44350.1};	--	GO:0031225,anchored component of membrane; GO:0005886,plasma membrane; GO:0008289,lipid binding; GO:0006869,lipid transport	PF14368.6:Probable lipid transfer
g11615	3.33	0.57	2.93	0.68	1.19	0.25	0.18	0.48	0.41	1.25	0.7	1.23	0.88	0.62	0.75	208	50	292	47	101	17	12	30	25	90	49	85	64	47	56	LG3	16253842	16263076	+	K13066 caffeic acid 3-O-methyltransferase [EC:2.1.1.68] | (RefSeq) caffeic acid 3-O-methyltransferase-like (A)	ko00940: Phenylpropanoid biosynthesis	PREDICTED: (R,S)-reticuline 7-O-methyltransferase-like [Ipomoea nil]	RecName: Full=Xanthohumol 4-O-methyltransferase {ECO:0000305}; EC=2.1.1.339 {ECO:0000269|PubMed:18223037}; AltName: Full=O-methyltransferase 2 {ECO:0000303|PubMed:18223037}; Short=HlOMT2 {ECO:0000303|PubMed:18223037};	SubName: Full=Uncharacterized protein {ECO:0000313|EMBL:CCB52011.1};	Hydroxyindole-O-methyltransferase and related SAM-dependent methyltransferases	GO:0008171,O-methyltransferase activity; GO:0046983,protein dimerization activity	PF00891.18:O-methyltransferase domain
g11616	0	0	0	0.41	0.8	0.6	0.96	1.66	1.26	3.47	2.69	3.46	1.24	1.28	1.26	0	0	0	28	68	41	63	103	77	249	187	239	90	96	93	LG3	16269710	16274307	-	K13457 disease resistance protein RPM1 | (RefSeq) disease resistance protein RPM1-like (A)	ko04626: Plant-pathogen interaction	PREDICTED: putative disease resistance protein RGA3 isoform X1 [Ipomoea nil]	RecName: Full=Putative disease resistance RPP13-like protein 1;	SubName: Full=putative disease resistance protein RGA3 {ECO:0000313|RefSeq:XP_016514076.1};	Apoptotic ATPase	GO:0005886,plasma membrane; GO:0043531,ADP binding; GO:0005524,ATP binding; GO:0009626,plant-type hypersensitive response; GO:0007165,signal transduction	PF00931.22:NB-ARC domain
g11623	1.76	7.23	4.29	6.1	7.45	5.8	5.8	8.48	7.27	5.15	3.89	4.8	3.84	2.07	2.955	65	375	252	249	373	233	225	312	264	219	160	196	165	92	129	LG3	16337765	16341817	-	K11594 ATP-dependent RNA helicase DDX3X [EC:3.6.4.13] | (RefSeq) DEAD-box ATP-dependent RNA helicase 37-like (A)	--	PREDICTED: DEAD-box ATP-dependent RNA helicase 37-like [Ipomoea nil]	RecName: Full=DEAD-box ATP-dependent RNA helicase 37; EC=3.6.4.13;	SubName: Full=DEAD-box ATP-dependent RNA helicase 37-like {ECO:0000313|RefSeq:XP_016550932.1, ECO:0000313|RefSeq:XP_016550933.1, ECO:0000313|RefSeq:XP_016550934.1};	ATP-dependent RNA helicase	GO:0005737,cytoplasm; GO:0005730,nucleolus; GO:0005777,peroxisome; GO:0005524,ATP binding; GO:0004004,ATP-dependent RNA helicase activity; GO:0003723,RNA binding; GO:0010501,RNA secondary structure unwinding	PF00270.29:DEAD/DEAH box helicase
g11624	7.13	15.29	9.11	20.09	27.12	27.51	21.6	24.52	20.45	39.37	33.24	24.12	13.1	17.42	15.26	141	425	287	440	728	593	449	484	398	897	734	528	302	415	359	LG3	16348182	16354427	+	K04382 serine/threonine-protein phosphatase 2A catalytic subunit [EC:3.1.3.16] | (RefSeq) serine/threonine-protein phosphatase PP2A catalytic subunit (A)	ko03015: mRNA surveillance pathway; ko04136: Autophagy - other	hypothetical protein POPTR_003G217900v3 [Populus trichocarpa]	RecName: Full=Serine/threonine-protein phosphatase PP2A catalytic subunit; EC=3.1.3.16;	RecName: Full=Serine/threonine-protein phosphatase {ECO:0000256|RuleBase:RU004273}; EC=3.1.3.16 {ECO:0000256|RuleBase:RU004273};	Serine/threonine protein phosphatase 2A, catalytic subunit	GO:0005737,cytoplasm; GO:0046872,metal ion binding; GO:0004721,phosphoprotein phosphatase activity	PF00149.28:Calcineurin-like phosphoesterase
g11626	1.55	2.87	0.03	1.44	1.55	0.62	8.88	6.49	5.68	2.37	3.84	4.14	3.89	2.23	3.06	37	96	1	38	50	16	222	154	133	65	102	109	108	64	86	LG3	16372932	16375104	+	--	--	--	--	--	--	--	--
g11632	9.44	2.48	11.19	0.34	2.9	1	2.92	1.43	4.23	0.52	0	0	0.35	0.84	0.595	252	93	476	10	105	29	82	38	111	16	0	0	11	27	19	LG3	16429812	16436759	+	--	--	PREDICTED: probable polyamine transporter At3g13620 [Ipomoea nil]	RecName: Full=Probable polyamine transporter At3g13620;	SubName: Full=Amino acid transporter {ECO:0000313|EMBL:PIN17174.1};	Amino acid transporters	GO:0005887,integral component of plasma membrane; GO:0015171,amino acid transmembrane transporter activity; GO:0015297,antiporter activity; GO:0015203,polyamine transmembrane transporter activity; GO:0015293,symporter activity; GO:0015846,polyamine transport	PF13520.6:Amino acid permease
g11633	37.67	27.7	18.18	69.19	64.26	63.88	65.73	54.91	65.91	30.46	37.34	37.87	16.7	22.94	19.82	480	496	369	976	1111	887	880	698	826	447	531	534	248	352	300	LG3	16446040	16448367	-	K03126 transcription initiation factor TFIID subunit 12 | (RefSeq) transcription initiation factor TFIID subunit 12b-like (A)	ko03022: Basal transcription factors	PREDICTED: transcription initiation factor TFIID subunit 12b-like isoform X2 [Ipomoea nil]	RecName: Full=Transcription initiation factor TFIID subunit 12b; AltName: Full=Protein CYTOKININ-HYPERSENSITIVE 1; AltName: Full=Protein ENHANCED ETHYLENE RESPONSE 4; AltName: Full=TBP-associated factor 12b; Short=AtTAF12b;	SubName: Full=Uncharacterized protein {ECO:0000313|EMBL:KNA14255.1};	Transcription initiation factor TFIID, subunit TAF12 (also component of histone acetyltransferase SAGA)	GO:0005669,transcription factor TFIID complex; GO:0046982,protein heterodimerization activity; GO:0006352,DNA-templated transcription, initiation; GO:0006355,regulation of transcription, DNA-templated	PF03847.13:Transcription initiation factor TFIID subunit A
g11634	7.43	4.67	2.99	15.93	53.63	26.26	16.59	21.48	16.76	6.55	5.72	8.91	8.37	4.25	6.31	212	187	136	503	2075	816	497	611	470	215	182	281	278	146	212	LG3	16448449	16453307	-	K03126 transcription initiation factor TFIID subunit 12 | (RefSeq) transcription initiation factor TFIID subunit 12b-like (A)	ko03022: Basal transcription factors	PREDICTED: transcription initiation factor TFIID subunit 12b-like isoform X3 [Ipomoea nil]	RecName: Full=Transcription initiation factor TFIID subunit 12b; AltName: Full=Protein CYTOKININ-HYPERSENSITIVE 1; AltName: Full=Protein ENHANCED ETHYLENE RESPONSE 4; AltName: Full=TBP-associated factor 12b; Short=AtTAF12b;	SubName: Full=transcription initiation factor TFIID subunit 12b-like isoform X2 {ECO:0000313|RefSeq:XP_016501261.1};	Transcription initiation factor TFIID, subunit TAF12 (also component of histone acetyltransferase SAGA)	GO:0005669,transcription factor TFIID complex; GO:0046982,protein heterodimerization activity; GO:0006352,DNA-templated transcription, initiation; GO:0006355,regulation of transcription, DNA-templated	--
g11637	18.72	2.95	20.53	2.05	0.81	3.86	3.51	12.92	3.69	0.79	1.33	1.4	0.22	0.91	0.565	289	64	505	35	17	65	57	199	56	14	23	24	4	17	11	LG3	16461915	16463167	-	K06892 feruloyl-CoA ortho-hydroxylase [EC:1.14.11.-] | (RefSeq) feruloyl CoA ortho-hydroxylase 1-like (A)	ko00940: Phenylpropanoid biosynthesis	PREDICTED: feruloyl CoA ortho-hydroxylase 1-like [Ipomoea nil]	RecName: Full=Feruloyl CoA ortho-hydroxylase 1; EC=1.14.11.-;	SubName: Full=Oxidoreductase {ECO:0000313|EMBL:BAL22347.1};	Iron/ascorbate family oxidoreductases	GO:0051213,dioxygenase activity; GO:0046872,metal ion binding; GO:0009805,coumarin biosynthetic process; GO:0010421,hydrogen peroxide-mediated programmed cell death; GO:0009699,phenylpropanoid biosynthetic process	PF03171.20:2OG-Fe(II) oxygenase superfamily
g11638	78.06	15.25	76.12	6.41	2.05	7.01	10.7	8.42	5.9	5.19	9.28	4.87	0	0.54	0.27	1319	362	2049	120	47	129	190	142	98	101	175	91	0	11	6	LG3	16472790	16474126	-	K06892 feruloyl-CoA ortho-hydroxylase [EC:1.14.11.-] | (RefSeq) feruloyl CoA ortho-hydroxylase 1-like (A)	ko00940: Phenylpropanoid biosynthesis	oxidoreductase [Ipomoea batatas]	RecName: Full=Feruloyl CoA ortho-hydroxylase 1; EC=1.14.11.-;	SubName: Full=Oxidoreductase {ECO:0000313|EMBL:BAL22346.1};	Iron/ascorbate family oxidoreductases	GO:0051213,dioxygenase activity; GO:0046872,metal ion binding; GO:0009805,coumarin biosynthetic process; GO:0010421,hydrogen peroxide-mediated programmed cell death; GO:0009699,phenylpropanoid biosynthetic process	PF03171.20:2OG-Fe(II) oxygenase superfamily
g11639	20.47	2.44	6.45	7.3	2.73	6.54	8.54	10.3	5.43	8.98	13.07	5.88	0.12	0.06	0.09	299	50	150	118	54	104	131	150	78	151	213	95	2	1	2	LG3	16480131	16481408	+	K06892 feruloyl-CoA ortho-hydroxylase [EC:1.14.11.-] | (RefSeq) feruloyl CoA ortho-hydroxylase 1-like (A)	ko00940: Phenylpropanoid biosynthesis	oxidoreductase [Ipomoea batatas]	RecName: Full=Feruloyl CoA ortho-hydroxylase 1; EC=1.14.11.-;	SubName: Full=Oxidoreductase {ECO:0000313|EMBL:BAL22348.1};	Iron/ascorbate family oxidoreductases	GO:0051213,dioxygenase activity; GO:0046872,metal ion binding; GO:0009805,coumarin biosynthetic process; GO:0010421,hydrogen peroxide-mediated programmed cell death; GO:0009699,phenylpropanoid biosynthetic process	PF03171.20:2OG-Fe(II) oxygenase superfamily
g11641	37.98	8.74	31.81	2.61	1.24	4.38	5.94	9.89	12	2.41	1.55	1.8	0	0.04	0.02	724	234	966	55	32	91	119	188	225	53	33	38	0	1	1	LG3	16487541	16488950	+	K06892 feruloyl-CoA ortho-hydroxylase [EC:1.14.11.-] | (RefSeq) feruloyl CoA ortho-hydroxylase 1-like (A)	ko00940: Phenylpropanoid biosynthesis	oxidoreductase [Ipomoea batatas]	RecName: Full=Feruloyl CoA ortho-hydroxylase 1; EC=1.14.11.-;	SubName: Full=Oxidoreductase {ECO:0000313|EMBL:BAL22347.1};	Iron/ascorbate family oxidoreductases	GO:0051213,dioxygenase activity; GO:0046872,metal ion binding; GO:0009805,coumarin biosynthetic process; GO:0010421,hydrogen peroxide-mediated programmed cell death; GO:0009699,phenylpropanoid biosynthetic process	PF03171.20:2OG-Fe(II) oxygenase superfamily
g11643	5.87	6.23	2.85	12.43	9.11	9.33	13.25	6.98	10.74	8.56	15.49	11.95	2.95	2.92	2.935	75	112	58	176	158	130	178	89	135	126	221	169	44	45	45	LG3	16496641	16500327	+	K11511 centromere protein S | (RefSeq) centromere protein S (A)	--	PREDICTED: centromere protein S [Ipomoea nil]	RecName: Full=Protein MHF1 homolog {ECO:0000303|PubMed:24635147}; Short=AtMHF1 {ECO:0000303|PubMed:24635147};	SubName: Full=Uncharacterized protein {ECO:0000313|EMBL:PIN15817.1};	--	GO:0071821,FANCM-MHF complex; GO:0043240,Fanconi anaemia nuclear complex; GO:0003682,chromatin binding; GO:0003690,double-stranded DNA binding; GO:0046982,protein heterodimerization activity; GO:0036297,interstrand cross-link repair; GO:0006312,mitotic recombination; GO:0007131,reciprocal meiotic recombination; GO:0031297,replication fork processing; GO:0000712,resolution of meiotic recombination…	PF15630.6:CENP-S protein
g11652	0	0.39	0	0.23	0.82	0.81	1.9	1.09	1.45	1.1	0.56	0.19	0.22	0.54	0.38	0	21	0	10	43	34	77	42	55	49	24	8	10	25	18	LG3	16598171	16601255	+	K13418 somatic embryogenesis receptor kinase 1 [EC:2.7.10.1 2.7.11.1] | (RefSeq) somatic embryogenesis receptor kinase 2 (A)	--	PREDICTED: G-type lectin S-receptor-like serine/threonine-protein kinase SD3-1 isoform X1 [Ipomoea nil]	RecName: Full=G-type lectin S-receptor-like serine/threonine-protein kinase SD3-1; EC=2.7.11.1; AltName: Full=S-domain-3 (SD3) receptor kinase 1; Short=SD3-1; Flags: Precursor;	SubName: Full=Serine/threonine protein kinase {ECO:0000313|EMBL:PIN11832.1}; EC=2.7.11.1 {ECO:0000313|EMBL:PIN11832.1};	--	GO:0016021,integral component of membrane; GO:0005886,plasma membrane; GO:0005524,ATP binding; GO:0005516,calmodulin binding; GO:0030246,carbohydrate binding; GO:0004674,protein serine/threonine kinase activity; GO:0006468,protein phosphorylation; GO:0048544,recognition of pollen	PF01453.24:D-mannose binding lectin
g1166	0.94	2.1	1.55	2.15	10.4	2.13	5.57	3.45	6.52	3.44	5.48	3.07	2.77	3.1	2.935	123	384	321	310	1838	302	763	448	835	516	797	443	420	486	453	LG1	6950759	6971912	+	--	--	PREDICTED: uncharacterized protein LOC109189108 isoform X1 [Ipomoea nil]	--	SubName: Full=uncharacterized protein LOC104237139 isoform X1 {ECO:0000313|RefSeq:XP_009789528.1};	Vacuolar protein sorting-associated protein	--	PF06650.12:SHR-binding domain of vacuolar-sorting associated protein 13
g11668	6.04	12.99	7.2	17.33	13.45	11.21	15.54	11.73	23.12	20.88	18.45	18.69	34.53	39.67	37.1	129	390	245	410	390	261	349	250	486	514	440	442	860	1021	941	LG3	16667953	16672607	+	K13071 pheophorbide a oxygenase [EC:1.14.15.17] | (RefSeq) pheophorbide a oxygenase, chloroplastic (A)	ko00860: Porphyrin and chlorophyll metabolism	PREDICTED: protochlorophyllide-dependent translocon component 52, chloroplastic-like [Ipomoea nil]	RecName: Full=Protochlorophyllide-dependent translocon component 52, chloroplastic; AltName: Full=ACD1-like protein; AltName: Full=Protein TIC 55-IV; AltName: Full=Translocon at the inner envelope membrane of chloroplasts 55-IV; Flags: Precursor;	SubName: Full=protochlorophyllide-dependent translocon component 52, chloroplastic-like isoform X2 {ECO:0000313|RefSeq:XP_016726999.1};	--	GO:0009507,chloroplast; GO:0009941,chloroplast envelope; GO:0009706,chloroplast inner membrane; GO:0016021,integral component of membrane; GO:0009536,plastid; GO:0051537,2 iron, 2 sulfur cluster binding; GO:0010277,chlorophyllide a oxygenase [overall] activity; GO:0046872,metal ion binding; GO:0015031,protein transport	PF00355.26:Rieske [2Fe-2S] domain
g11670	11.62	15.32	11.68	28.78	48.67	41.05	14.6	13.63	19.57	14.34	11.26	16.78	50.63	39.13	44.88	306	567	490	839	1739	1178	404	358	507	435	331	489	1554	1241	1398	LG3	16678663	16683124	+	K13071 pheophorbide a oxygenase [EC:1.14.15.17] | (RefSeq) pheophorbide a oxygenase, chloroplastic (A)	ko00860: Porphyrin and chlorophyll metabolism	PREDICTED: protochlorophyllide-dependent translocon component 52, chloroplastic-like [Ipomoea nil]	RecName: Full=Protochlorophyllide-dependent translocon component 52, chloroplastic; AltName: Full=ACD1-like protein; AltName: Full=Protein TIC 55-IV; AltName: Full=Translocon at the inner envelope membrane of chloroplasts 55-IV; Flags: Precursor;	SubName: Full=Rieske (2Fe-2S) domain-containing family protein {ECO:0000313|EMBL:EEE83915.1};	--	GO:0009507,chloroplast; GO:0009941,chloroplast envelope; GO:0009706,chloroplast inner membrane; GO:0016021,integral component of membrane; GO:0009536,plastid; GO:0051537,2 iron, 2 sulfur cluster binding; GO:0010277,chlorophyllide a oxygenase [overall] activity; GO:0046872,metal ion binding; GO:0015031,protein transport	PF00355.26:Rieske [2Fe-2S] domain
g11678	10.17	5.6	6.78	1.3	3.01	1	0	0	0	3.29	7.57	2.34	5.87	3.91	4.89	177	137	188	25	71	19	0	0	0	66	147	45	119	82	101	LG3	16735313	16736518	+	--	--	PREDICTED: uncharacterized protein LOC109175044 [Ipomoea nil]	RecName: Full=Sugar transport protein 1; AltName: Full=Glucose transporter; AltName: Full=Hexose transporter 1;	SubName: Full=Uncharacterized protein {ECO:0000313|EMBL:CDP19270.1};	Predicted transporter (major facilitator superfamily)	GO:0016021,integral component of membrane; GO:0005634,nucleus; GO:0005886,plasma membrane; GO:0009506,plasmodesma; GO:0005773,vacuole; GO:0005355,glucose transmembrane transporter activity; GO:0015145,monosaccharide transmembrane transporter activity; GO:0005351,carbohydrate:proton symporter activity; GO:0046323,glucose import; GO:0035428,NA; GO:0015749,monosaccharide transmembrane transport	--
g11681	1.83	4.62	7.29	5.07	3.36	6.68	1.85	1.11	1.86	2.27	0.85	1.51	3.86	2.26	3.06	33	117	209	101	82	131	35	20	33	47	17	30	81	49	65	LG3	16759983	16764642	+	K15104 solute carrier family 25 (mitochondrial oxoglutarate transporter), member 11 | (RefSeq) mitochondrial dicarboxylate/tricarboxylate transporter DTC-like (A)	--	PREDICTED: mitochondrial dicarboxylate/tricarboxylate transporter DTC-like [Ipomoea nil]	RecName: Full=Mitochondrial dicarboxylate/tricarboxylate transporter DTC; AltName: Full=Dicarboxylate/tricarboxylate carrier;	SubName: Full=Putative substrate carrier protein {ECO:0000313|EMBL:OTG01787.1};	Mitochondrial oxoglutarate/malate carrier proteins	GO:0005618,cell wall; GO:0009507,chloroplast; GO:0009941,chloroplast envelope; GO:0016021,integral component of membrane; GO:0005743,mitochondrial inner membrane; GO:0005739,mitochondrion; GO:0009506,plasmodesma; GO:0005774,vacuolar membrane; GO:0005310,dicarboxylic acid transmembrane transporter activity; GO:0015367,oxoglutarate:malate antiporter activity; GO:0015142,tricarboxylic acid transmemb…	PF00153.27:Mitochondrial carrier protein
g11684	3.81	4.11	3.37	6.57	26.76	6.63	9.72	11.3	8.81	6.7	6.85	5.56	3.94	4.71	4.325	364	551	512	694	3466	690	975	1076	827	737	730	587	438	541	490	LG3	16785666	16801008	-	--	--	PREDICTED: calpain-type cysteine protease DEK1 [Ipomoea nil]	RecName: Full=Calpain-type cysteine protease DEK1; EC=3.4.22.-; AltName: Full=Phytocalpain DEK1; AltName: Full=Protein DEFECTIVE KERNEL 1; Short=AtDEK1; AltName: Full=Protein EMBRYO DEFECTIVE 1275; AltName: Full=Protein EMBRYO DEFECTIVE 80; Flags: Precursor;	SubName: Full=calpain-type cysteine protease DEK1 {ECO:0000313|RefSeq:XP_009766184.1};	Cytosolic Ca2+-dependent cysteine protease (calpain), large subunit (EF-Hand protein superfamily)	GO:0005737,cytoplasm; GO:0005789,endoplasmic reticulum membrane; GO:0010008,endosome membrane; GO:0005887,integral component of plasma membrane; GO:0004198,calcium-dependent cysteine-type endopeptidase activity; GO:0008234,cysteine-type peptidase activity; GO:0009793,embryo development ending in seed dormancy; GO:0090628,plant epidermal cell fate specification; GO:0032877,positive regulation of D…	PF00648.21:Calpain family cysteine protease
g11686	11.44	14.1	19.7	10.17	9.44	5.13	12.98	16.31	13.28	6.05	9.47	6.75	5.76	5.6	5.68	317	549	870	312	355	155	378	451	362	193	293	207	186	187	187	LG3	16816908	16820548	-	--	--	PREDICTED: uncharacterized protein LOC109160061 [Ipomoea nil]	--	SubName: Full=Uncharacterized protein {ECO:0000313|EMBL:OIT08519.1};	--	--	PF03080.15:Neprosin
g11688	20.47	15.18	24.73	10.67	9.52	12.95	11.82	11.42	9.23	11.22	13.36	19.06	9.11	7.27	8.19	1024	1067	1970	591	646	706	621	570	454	646	746	1055	531	438	485	LG3	16834265	16841182	+	K02936 large subunit ribosomal protein L7Ae | (RefSeq) 60S ribosomal protein L7a-1-like (A)	ko03010: Ribosome	PREDICTED: pentatricopeptide repeat-containing protein At1g56690, mitochondrial-like isoform X2 [Ipomoea nil]	RecName: Full=Pentatricopeptide repeat-containing protein At1g56690, mitochondrial; Flags: Precursor;	SubName: Full=pentatricopeptide repeat-containing protein At1g56690, mitochondrial-like {ECO:0000313|RefSeq:XP_009768660.1, ECO:0000313|RefSeq:XP_009768661.1};	FOG: PPR repeat	GO:0043231,intracellular membrane-bounded organelle; GO:0005739,mitochondrion; GO:0004519,endonuclease activity; GO:0003723,RNA binding; GO:0008270,zinc ion binding; GO:0009451,RNA modification	PF01535.20:PPR repeat
g11692	1.52	10.25	2.81	2.42	3.23	3.04	0	4.84	19.09	29.35	16.83	19.15	2.23	5.87	4.05	17	161	50	30	49	37	0	54	210	378	210	237	29	79	54	LG3	16870385	16875312	+	--	--	PREDICTED: uncharacterized protein LOC109160100 [Ipomoea nil]	--	SubName: Full=Uncharacterized protein {ECO:0000313|EnsemblPlants:Solyc01g005530.2.1};	--	GO:0009642,response to light intensity	--
g11696	1.8	2.13	0	5.74	4.33	9.94	2.34	4	1.58	1.65	1.42	0.81	2.82	1.68	2.25	74	123	0	261	241	445	101	164	64	78	65	37	135	83	109	LG3	16916785	16930704	+	K08288 protein kinase C substrate 80K-H | (RefSeq) glucosidase 2 subunit beta (A)	ko04141: Protein processing in endoplasmic reticulum	PREDICTED: glucosidase 2 subunit beta isoform X1 [Ipomoea nil]	RecName: Full=Glucosidase 2 subunit beta; AltName: Full=Glucosidase II subunit beta; Flags: Precursor;	SubName: Full=glucosidase 2 subunit beta-like isoform X1 {ECO:0000313|RefSeq:XP_009780591.1};	Protein kinase C substrate, 80 KD protein, heavy chain	GO:0005783,endoplasmic reticulum; GO:0042742,defense response to bacterium; GO:0006491,N-glycan processing	PF12999.7:Glucosidase II beta subunit-like
g11697	1.71	5.82	6.84	0.32	0.38	0.85	1.24	6.92	1.88	0.47	0	0	4.94	6.14	5.54	63	301	401	13	19	34	48	254	68	20	0	0	212	272	242	LG3	16931975	16940073	+	K03452 magnesium/proton exchanger | (RefSeq) pentatricopeptide repeat-containing protein At3g62890-like (A)	--	PREDICTED: protein TPR1-like isoform X14 [Ipomoea nil]	RecName: Full=Pentatricopeptide repeat-containing protein At2g39620;	SubName: Full=Putative pentatricopeptide repeat-containing protein-like {ECO:0000313|EMBL:JAP25577.1}; Flags: Fragment;	FOG: PPR repeat	GO:0043231,intracellular membrane-bounded organelle; GO:0004519,endonuclease activity; GO:0003723,RNA binding; GO:0016556,mRNA modification	--
g11701	2.04	3.68	0	5.9	3.31	4.23	4.65	5.34	2.32	1.25	2.37	4.53	0.55	1.53	1.04	51	129	0	163	112	115	122	133	57	36	66	125	16	46	31	LG3	16964735	16969673	+	K20318 protein SYS1 | (RefSeq) protein SYS1 homolog (A)	--	PREDICTED: protein SYS1 homolog [Ipomoea nil]	--	SubName: Full=Uncharacterized protein {ECO:0000313|EMBL:CDO98068.1};	Integral membrane protein involved in transport between the late Golgi and endosome	GO:0000139,Golgi membrane; GO:0016021,integral component of membrane	PF09801.9:Integral membrane protein S linking to the trans Golgi network
g11704	6.46	7.59	10.94	15.34	13.1	19.05	13.26	10.6	10.38	4.6	5.43	10.32	4.82	7.21	6.015	229	378	618	602	630	736	494	375	362	188	215	405	199	308	254	LG3	16988455	16999667	+	K08288 protein kinase C substrate 80K-H | (RefSeq) glucosidase 2 subunit beta (A)	ko04141: Protein processing in endoplasmic reticulum	PREDICTED: glucosidase 2 subunit beta isoform X1 [Ipomoea nil]	RecName: Full=Glucosidase 2 subunit beta; AltName: Full=Glucosidase II subunit beta; Flags: Precursor;	SubName: Full=glucosidase 2 subunit beta-like isoform X1 {ECO:0000313|RefSeq:XP_009780591.1};	Protein kinase C substrate, 80 KD protein, heavy chain	GO:0005783,endoplasmic reticulum; GO:0042742,defense response to bacterium; GO:0006491,N-glycan processing	PF12999.7:Glucosidase II beta subunit-like
g11708	59.32	83.87	60.7	100.59	135.73	118.28	182.76	205.56	180.37	249.91	241.27	292.48	307.04	218.2	262.62	1564	3107	2549	2936	4855	3398	5063	5406	4677	7588	7099	8533	9434	6928	8181	LG3	17021218	17023862	-	K11982 E3 ubiquitin-protein ligase RNF115/126 [EC:2.3.2.27] | (RefSeq) E3 ubiquitin-protein ligase RDUF2-like (A)	--	PREDICTED: E3 ubiquitin-protein ligase RDUF2-like isoform X2 [Ipomoea nil]	RecName: Full=E3 ubiquitin-protein ligase SIRP1 {ECO:0000305}; EC=2.3.2.27 {ECO:0000269|PubMed:27118216}; AltName: Full=Salt-induced RING finger protein 1 {ECO:0000303|PubMed:27118216}; Short=OsSIRP1 {ECO:0000303|PubMed:27118216};	SubName: Full=Uncharacterized protein {ECO:0000313|EMBL:CDP18575.1};	FOG: Predicted E3 ubiquitin ligase	GO:0005737,cytoplasm; GO:0046872,metal ion binding; GO:0061630,ubiquitin protein ligase activity; GO:0043161,proteasome-mediated ubiquitin-dependent protein catabolic process; GO:0000209,protein polyubiquitination; GO:0042787,NA	PF13639.6:Ring finger domain
g1171	6.31	7.3	5.65	12.2	16.97	11.65	5.93	7.47	10.63	6.47	5.95	10.41	5.35	6.21	5.78	248	403	354	531	905	499	245	293	411	293	261	453	245	294	270	LG1	6990479	6993489	+	--	--	PREDICTED: BTB/POZ domain-containing protein At5g66560 isoform X1 [Ipomoea nil]	RecName: Full=BTB/POZ domain-containing protein At5g66560;	SubName: Full=BTB/POZ domain-containing protein {ECO:0000313|EMBL:PHT91539.1};	--	GO:0005886,plasma membrane; GO:0016567,protein ubiquitination	PF03000.14:NPH3 family
g11714	6.71	8.02	5.3	7.2	11.94	8.35	16.54	22.35	24.45	12.69	25.28	9.61	8.33	10.64	9.485	325	546	409	386	785	441	842	1080	1165	708	1367	515	470	621	546	LG3	17103107	17112855	+	K10406 kinesin family member C2/C3 | (RefSeq) kinesin-like protein KIN-14S (A)	--	PREDICTED: kinesin-like protein KIN-14T [Ipomoea nil]	RecName: Full=Kinesin-like protein KIN-14T {ECO:0000305};	SubName: Full=kinesin-like protein KIF2C {ECO:0000313|RefSeq:XP_009793652.1};	Kinesin (KAR3 subfamily)	GO:0005871,kinesin complex; GO:0005874,microtubule; GO:0005739,mitochondrion; GO:0005524,ATP binding; GO:0016887,ATPase activity; GO:0008017,microtubule binding; GO:0003777,microtubule motor activity; GO:0007018,microtubule-based movement	PF00225.23:Kinesin motor domain
g11715	0	0.91	0	0.39	1.96	0.24	1.35	2.93	1.34	0.71	0.59	1.1	0.28	0.46	0.37	0	39	0	13	81	8	43	89	40	25	20	37	10	17	14	LG3	17112956	17115062	-	K03452 magnesium/proton exchanger | (RefSeq) pentatricopeptide repeat-containing protein At3g62890-like (A)	--	PREDICTED: pentatricopeptide repeat-containing protein At5g56310 [Ipomoea nil]	RecName: Full=Pentatricopeptide repeat-containing protein At5g56310;	SubName: Full=pentatricopeptide repeat-containing protein At5g56310 {ECO:0000313|RefSeq:XP_009793653.1, ECO:0000313|RefSeq:XP_009793654.1, ECO:0000313|RefSeq:XP_009793655.1};	FOG: PPR repeat	GO:0005739,mitochondrion; GO:0004519,endonuclease activity; GO:0003723,RNA binding; GO:0080156,mitochondrial mRNA modification	PF01535.20:PPR repeat
g11716	34.31	48.84	37.67	13.46	17.52	11.98	12.03	4.36	5.62	26.89	39.45	24.58	32.03	41.49	36.76	410	820	717	178	284	156	151	52	66	370	526	325	446	597	522	LG3	17115697	17116620	+	K02960 small subunit ribosomal protein S16e | (RefSeq) 40S ribosomal protein S16 (A)	ko03010: Ribosome	PREDICTED: 40S ribosomal protein S16 [Ipomoea nil]	RecName: Full=40S ribosomal protein S16;	SubName: Full=40S ribosomal protein S16-like {ECO:0000313|RefSeq:XP_009764504.1};	40S ribosomal protein S16	GO:0005840,ribosome; GO:0003735,structural constituent of ribosome; GO:0006412,translation	PF00380.19:Ribosomal protein S9/S16
g1172	31.26	65.52	33.48	18.32	27.57	20.25	4.54	18.26	18.11	44.86	54.27	50.47	109.41	139.47	124.44	544	1602	928	353	651	384	83	317	310	899	1054	972	2219	2923	2571	LG1	6996439	6998553	+	K02716 photosystem II oxygen-evolving enhancer protein 1 | (RefSeq) oxygen-evolving enhancer protein 1, chloroplastic-like (A)	ko00195: Photosynthesis	PREDICTED: oxygen-evolving enhancer protein 1, chloroplastic-like [Ipomoea nil]	RecName: Full=Oxygen-evolving enhancer protein 1, chloroplastic; Short=OEE1; AltName: Full=33 kDa subunit of oxygen evolving system of photosystem II; AltName: Full=33 kDa thylakoid membrane protein; AltName: Full=OEC 33 kDa subunit; Flags: Precursor;	SubName: Full=oxygen-evolving enhancer protein 1, chloroplastic {ECO:0000313|RefSeq:XP_016502000.1};	--	GO:0009535,chloroplast thylakoid membrane; GO:0019898,extrinsic component of membrane; GO:0016021,integral component of membrane; GO:0009654,photosystem II oxygen evolving complex; GO:0005509,calcium ion binding; GO:0015979,photosynthesis; GO:0042549,photosystem II stabilization	PF01716.18:Manganese-stabilising protein / photosystem II polypeptide
g11720	6.57	11.67	9.78	8.24	17.32	7.02	9.88	11.95	20.3	18.46	20.26	20.82	5.01	9	7.005	214	534	507	297	765	249	338	388	650	692	736	750	190	353	272	LG3	17136995	17145362	-	K20298 vacuolar protein sorting-associated protein 52 | (RefSeq) vacuolar protein sorting-associated protein 52 A-like (A)	--	PREDICTED: vacuolar protein sorting-associated protein 52 A-like isoform X2 [Ipomoea nil]	RecName: Full=Vacuolar protein sorting-associated protein 52 A; Short=AtVPS52; AltName: Full=ARE1-like protein POK; AltName: Full=Protein POKY POLLEN TUBE; AltName: Full=Protein T-DNA TRANSMISSION DEFECT 8;	SubName: Full=vacuolar protein sorting-associated protein 52 A-like isoform X2 {ECO:0000313|RefSeq:XP_009779062.1};	Vacuolar sorting protein VPS52/suppressor of actin Sac2	GO:0005829,cytosol; GO:0012505,endomembrane system; GO:0010008,endosome membrane; GO:0000938,GARP complex; GO:0005794,Golgi apparatus; GO:0000139,Golgi membrane; GO:0017137,Rab GTPase binding; GO:0019905,syntaxin binding; GO:0032456,endocytic recycling; GO:0006896,Golgi to vacuole transport; GO:0009860,pollen tube growth; GO:0015031,protein transport; GO:0042147,retrograde transport, endosome to …	PF04129.12:Vps52 / Sac2 family
g11723	16.01	18.65	17.13	8.76	11.51	10.85	11.72	20.57	14.12	4.44	5.01	5.08	10.64	9.82	10.23	558	913	951	338	544	412	429	715	484	178	195	196	432	412	422	LG3	17158786	17164412	-	--	--	PREDICTED: uncharacterized protein slp1-like [Ipomoea nil]	RecName: Full=SUN domain-containing protein 3 {ECO:0000305}; Short=AtSUN3 {ECO:0000303|PubMed:25217773};	SubName: Full=uncharacterized protein slp1-like {ECO:0000313|RefSeq:XP_016508770.1, ECO:0000313|RefSeq:XP_016508771.1, ECO:0000313|RefSeq:XP_016508772.1};	Uncharacterized conserved protein	GO:0005783,endoplasmic reticulum; GO:0005789,endoplasmic reticulum membrane; GO:0016021,integral component of membrane; GO:0005635,nuclear envelope; GO:0031965,nuclear membrane; GO:0043621,protein self-association	PF07738.13:Sad1 / UNC-like C-terminal
g1173	11.14	13.57	13.99	3.62	3.97	3.71	9.88	16.54	13.38	7.63	10.31	6.31	4.1	7.27	5.685	364	623	728	131	176	132	339	539	430	287	376	228	156	286	221	LG1	7001738	7014004	-	--	--	PREDICTED: uncharacterized protein LOC109188783 isoform X1 [Ipomoea nil]	--	SubName: Full=Uncharacterized protein {ECO:0000313|EMBL:OIT05837.1};	--	--	PF04784.14:Protein of unknown function, DUF547
g11730	0	0	0	1.58	1.68	1.45	0	0	0	2.13	1.15	0	0	0	0	0	0	0	30	39	27	0	0	0	42	22	0	0	0	0	LG3	17200328	17207559	-	--	--	PREDICTED: F-box/kelch-repeat protein At3g23880-like [Ipomoea nil]	RecName: Full=Putative transferase At1g60990, chloroplastic {ECO:0000305}; EC=2.1.-.- {ECO:0000305}; AltName: Full=Iron-sulfur cluster assembly factor homolog COG0354 {ECO:0000305}; Flags: Precursor;	SubName: Full=Uncharacterized protein {ECO:0000313|EMBL:PHT41484.1};	Aminomethyl transferase	GO:0009507,chloroplast; GO:0005739,mitochondrion; GO:0016491,oxidoreductase activity; GO:0016740,transferase activity; GO:0016226,iron-sulfur cluster assembly	--
g11731	0.04	0	0	0.35	0.11	0	0.1	0.47	0	1.43	1.09	0.29	0	0	0	1	0	0	11	4	0	3	13	0	46	34	9	0	0	0	LG3	17208939	17213319	-	K06110 exocyst complex component 3 | (RefSeq) exocyst complex component SEC6 (A)	--	PREDICTED: F-box/kelch-repeat protein At3g23880-like [Ipomoea nil]	RecName: Full=F-box/kelch-repeat protein At3g06240;	SubName: Full=Uncharacterized protein {ECO:0000313|EMBL:CDP21417.1};	--	--	PF07734.13:F-box associated
g11737	14.96	15.18	21.72	7.18	5.05	11.07	6.11	3.11	4.28	4.76	3.68	0	3.39	6.65	5.02	284	405	657	151	130	229	122	59	80	104	78	0	75	152	114	LG3	17238414	17241253	+	K00943 dTMP kinase [EC:2.7.4.9] | (RefSeq) thymidylate kinase-like (A)	ko00240: Pyrimidine metabolism	PREDICTED: thymidylate kinase-like isoform X1 [Ipomoea nil]	RecName: Full=Thymidylate kinase {ECO:0000305}; Short=AtTMPK {ECO:0000303|PubMed:18036198}; EC=2.7.4.9 {ECO:0000305}; AltName: Full=Protein ZEUS1 {ECO:0000303|PubMed:18036198}; Flags: Precursor;	SubName: Full=Uncharacterized protein {ECO:0000313|EnsemblPlants:Solyc07g048010.2.1};	Thymidylate kinase/adenylate kinase	GO:0005737,cytoplasm; GO:0005739,mitochondrion; GO:0005654,nucleoplasm; GO:0005524,ATP binding; GO:0004798,thymidylate kinase activity; GO:0006233,dTDP biosynthetic process; GO:0006235,dTTP biosynthetic process; GO:0009793,embryo development ending in seed dormancy	PF02223.17:Thymidylate kinase
g11739	0	0	0	0.05	0	0	0	0	0.97	0	0	0	2.31	3.39	2.85	0	0	0	2	0	0	0	0	33	0	0	0	93	141	117	LG3	17242793	17248449	-	K19355 mannan endo-1,4-beta-mannosidase [EC:3.2.1.78] | (RefSeq) mannan endo-1,4-beta-mannosidase 1-like (A)	ko00051: Fructose and mannose metabolism	PREDICTED: mannan endo-1,4-beta-mannosidase 1-like [Ipomoea nil]	RecName: Full=Mannan endo-1,4-beta-mannosidase 5; EC=3.2.1.78; AltName: Full=Beta-mannanase 5; AltName: Full=Endo-beta-1,4-mannanase 5; AltName: Full=LeMAN5; Flags: Precursor;	SubName: Full=mannan endo-1,4-beta-mannosidase 1-like {ECO:0000313|RefSeq:XP_009779875.1};	--	GO:0005576,extracellular region; GO:0016985,mannan endo-1,4-beta-mannosidase activity; GO:0005975,carbohydrate metabolic process	PF00150.18:Cellulase (glycosyl hydrolase family 5)
g11750	3.13	10.57	2.62	8.64	16.83	10.99	2.23	2.68	1.44	2.69	0.75	1.93	9.34	10.66	10	104	494	139	318	759	398	78	89	47	103	28	71	362	427	395	LG3	17290914	17293321	+	K17065 dynamin 1-like protein [EC:3.6.5.5] | (RefSeq) dynamin-related protein 3A (A)	--	PREDICTED: dynamin-related protein 4C-like [Ipomoea nil]	RecName: Full=Dynamin-related protein 4C;	SubName: Full=Uncharacterized protein {ECO:0000313|EnsemblPlants:Solyc04g072030.1.1};	Vacuolar sorting protein VPS1, dynamin, and related proteins	GO:0005737,cytoplasm; GO:0005874,microtubule; GO:0005525,GTP binding; GO:0003924,GTPase activity; GO:0008017,microtubule binding; GO:0000266,mitochondrial fission	PF01031.20:Dynamin central region
g11753	1.92	5.27	1.34	5.91	16.36	9.67	0.81	0.53	2.16	0.28	2.19	2.45	1.37	1.9	1.635	36	139	40	123	417	198	16	10	40	6	46	51	30	43	37	LG3	17323234	17324535	+	K17065 dynamin 1-like protein [EC:3.6.5.5] | (RefSeq) dynamin-related protein 3A (A)	--	PREDICTED: dynamin-related protein 4C-like [Ipomoea nil]	RecName: Full=Dynamin-related protein 4C;	SubName: Full=Putative dynamin-related protein 4C-like {ECO:0000313|EMBL:JAP33332.1};	Vacuolar sorting protein VPS1, dynamin, and related proteins	GO:0005737,cytoplasm; GO:0005874,microtubule; GO:0005525,GTP binding; GO:0003924,GTPase activity; GO:0008017,microtubule binding; GO:0000266,mitochondrial fission	PF00350.23:Dynamin family
g11754	7.29	5.7	10.58	10.7	8.3	8.42	3.28	0.07	0	4.46	1.81	1	14.46	11.72	13.09	112	123	259	182	173	141	53	1	0	79	31	17	259	217	238	LG3	17324644	17325708	+	--	--	PREDICTED: dynamin-related protein 4C-like [Ipomoea nil]	RecName: Full=Dynamin-related protein 4C;	SubName: Full=Dynamin-related protein 4c {ECO:0000313|EMBL:OIT21533.1};	Vacuolar sorting protein VPS1, dynamin, and related proteins	GO:0005737,cytoplasm; GO:0005874,microtubule; GO:0005525,GTP binding; GO:0003924,GTPase activity; GO:0008017,microtubule binding; GO:0000266,mitochondrial fission	PF02212.18:Dynamin GTPase effector domain
g11757	5.35	5.55	3.27	4.71	3.13	2.6	4.9	4.6	2.9	5.2	9.34	11.76	4.01	6.83	5.42	268	391	261	261	213	142	258	230	143	300	522	652	234	412	323	LG3	17344835	17350475	-	K17413 small subunit ribosomal protein S35 | (RefSeq) uncharacterized LOC109188018 (A)	--	PREDICTED: uncharacterized protein LOC104236832 [Nicotiana sylvestris]	RecName: Full=Retrovirus-related Pol polyprotein from transposon RE1; AltName: Full=Retro element 1 {ECO:0000303|PubMed:10689195}; Short=AtRE1 {ECO:0000303|PubMed:10689195}; Includes: RecName: Full=Protease RE1; EC=3.4.23.-; Includes: RecName: Full=Reverse transcriptase RE1; EC=2.7.7.49; Includes: RecName: Full=Endonuclease RE1;	SubName: Full=uncharacterized protein LOC104236832 {ECO:0000313|RefSeq:XP_009789146.1};	FOG: Transposon-encoded proteins with TYA, reverse transcriptase, integrase domains in various combinations	GO:0004190,aspartic-type endopeptidase activity; GO:0004519,endonuclease activity; GO:0046872,metal ion binding; GO:0003676,nucleic acid binding; GO:0003964,RNA-directed DNA polymerase activity; GO:0015074,DNA integration; GO:0006310,DNA recombination	PF13976.6:GAG-pre-integrase domain
g11758	16.03	15.73	7.52	17.24	15.44	18.21	8.5	12.53	9.93	15.91	20.79	28.64	21.48	28.27	24.875	463	638	346	551	605	573	258	361	282	529	670	915	723	983	853	LG3	17351520	17360983	+	--	--	PREDICTED: uncharacterized protein LOC109160140 [Ipomoea nil]	--	SubName: Full=Uncharacterized protein {ECO:0000313|EMBL:OIT24868.1};	Predicted membrane protein	GO:0016021,integral component of membrane	PF09335.11:SNARE associated Golgi protein
g11764	137.8	117.27	138.54	89.5	33	86.39	71.13	58.37	74	103.78	96.78	89.82	52.06	54.19	53.125	2253	2694	3608	1620	732	1539	1222	952	1190	1954	1766	1625	992	1067	1030	LG3	17405880	17408680	+	K02989 small subunit ribosomal protein S5e | (RefSeq) 40S ribosomal protein S5 (A)	ko03010: Ribosome	PREDICTED: 40S ribosomal protein S5 isoform X2 [Ipomoea nil]	RecName: Full=40S ribosomal protein S5; Flags: Fragment;	SubName: Full=40S ribosomal protein S5 {ECO:0000313|RefSeq:XP_009782596.1};	Ribosomal protein S7	GO:0015935,small ribosomal subunit; GO:0003723,RNA binding; GO:0003735,structural constituent of ribosome; GO:0006412,translation	PF00177.21:Ribosomal protein S7p/S5e
g11772	24.05	28.87	22.15	11.62	11.4	15.05	25.59	19.63	13.49	14.99	12.67	13.46	12.23	10.34	11.285	415	700	609	222	267	283	464	338	229	298	244	257	246	215	231	LG3	17486011	17488915	-	K05894 12-oxophytodienoic acid reductase [EC:1.3.1.42] | (RefSeq) putative 12-oxophytodienoate reductase 11 (A)	ko00592: alpha-Linolenic acid metabolism	PREDICTED: putative 12-oxophytodienoate reductase 11 [Ipomoea nil]	RecName: Full=12-oxophytodienoate reductase 1; EC=1.3.1.42; AltName: Full=12-oxophytodienoate-10,11-reductase 1; Short=OPDA-reductase 1; AltName: Full=LeOPR1;	SubName: Full=12-oxophytodienoate reductase {ECO:0000313|EMBL:JAV45552.1};	NADH:flavin oxidoreductase/12-oxophytodienoate reductase	GO:0005737,cytoplasm; GO:0005622,intracellular; GO:0016629,12-oxophytodienoate reductase activity; GO:0010181,FMN binding; GO:0055114,oxidation-reduction process; GO:0031408,oxylipin biosynthetic process	PF00724.20:NADH:flavin oxidoreductase / NADH oxidase family
g11773	13.78	12.29	8.65	24.89	20.32	26.22	36.33	52.38	49.84	30.7	23.91	40.07	12.36	7	9.68	636	797	636	1272	1273	1319	1762	2412	2263	1632	1232	2047	665	389	527	LG3	17503120	17508356	+	K00924 kinase [EC:2.7.1.-] | (RefSeq) probable receptor-like protein kinase At5g47070 (A)	--	PREDICTED: probable receptor-like protein kinase At5g24010 [Ipomoea nil]	RecName: Full=Probable receptor-like protein kinase At5g24010; EC=2.7.11.-; Flags: Precursor;	SubName: Full=probable receptor-like protein kinase At5g24010 {ECO:0000313|RefSeq:XP_009766613.1};	Serine/threonine protein kinase	GO:0016021,integral component of membrane; GO:0005886,plasma membrane; GO:0009506,plasmodesma; GO:0005524,ATP binding; GO:0004674,protein serine/threonine kinase activity	PF07714.17:Protein tyrosine kinase
g11774	0	0	0	0	0.13	0.28	0	0	0	2.11	0.63	2.72	0	0.04	0.02	0	0	0	0	4	7	0	0	0	55	16	68	0	1	1	LG3	17509840	17514830	+	--	--	PREDICTED: GDSL esterase/lipase At1g54790-like [Ipomoea nil]	RecName: Full=GDSL esterase/lipase At1g54790; EC=3.1.1.-; AltName: Full=Extracellular lipase At1g54790; Flags: Precursor;	SubName: Full=Uncharacterized protein {ECO:0000313|EnsemblPlants:Solyc01g098650.2.1};	--	GO:0005576,extracellular region; GO:0016788,hydrolase activity, acting on ester bonds; GO:0016042,lipid catabolic process	PF00657.22:GDSL-like Lipase/Acylhydrolase
g11776	27.95	38.03	33.27	64.94	72.17	72.89	42.33	42.48	46.55	121.2	125.43	104.16	78.34	57.58	67.96	624	1193	1183	1605	2186	1773	993	946	1022	3116	3125	2573	2038	1548	1793	LG3	17522925	17524988	-	K03233 elongation factor 1-gamma | (RefSeq) InEF1G; elongation factor 1-gamma 2-like (A)	--	PREDICTED: elongation factor 1-gamma 2-like [Ipomoea nil]	RecName: Full=Elongation factor 1-gamma 2; Short=EF-1-gamma 2; AltName: Full=eEF-1B gamma 2;	SubName: Full=Elongation factor 1-gamma {ECO:0000313|EMBL:AMB19030.1}; Flags: Fragment;	Glutathione S-transferase	GO:0005737,cytoplasm; GO:0005634,nucleus; GO:0004364,glutathione transferase activity; GO:0003746,translation elongation factor activity; GO:0006749,glutathione metabolic process	PF00647.19:Elongation factor 1 gamma, conserved domain
g1178	3.76	3.37	1.15	5.31	8.21	8.42	7.37	5.14	4.99	6.78	6.9	3.82	9.78	8.96	9.37	105	132	51	164	311	256	216	143	137	218	215	118	318	301	310	LG1	7054491	7057795	+	--	--	PREDICTED: protein DA1-related 1-like [Ipomoea nil]	RecName: Full=Protein DA1-related 1;	SubName: Full=Uncharacterized protein {ECO:0000313|EMBL:CDP02419.1};	Adaptor protein Enigma and related PDZ-LIM proteins	GO:0005886,plasma membrane; GO:0046872,metal ion binding; GO:0043130,ubiquitin binding	PF12315.8:Protein DA1
g11781	10.04	17.12	15.3	4.64	5.05	6.07	11.12	7.96	17.34	16.02	18.21	5.21	2.07	10.8	6.435	129	309	313	66	88	85	150	102	219	237	261	74	31	167	99	LG3	17560573	17562624	+	--	--	PREDICTED: uncharacterized protein LOC109159752 [Ipomoea nil]	--	SubName: Full=Uncharacterized protein {ECO:0000313|EMBL:EOY33496.1};	--	--	--
g11788	78.08	92.59	60.39	59.37	31.66	45.15	81.1	67.96	72.97	108.73	101.87	97.28	76.06	75.55	75.805	1138	1896	1402	958	626	717	1242	988	1046	1825	1657	1569	1292	1326	1309	LG3	17606334	17612478	-	K01649 2-isopropylmalate synthase [EC:2.3.3.13] | (RefSeq) IPMS; 2-isopropylmalate synthase A-like (A)	ko00290: Valine, leucine and isoleucine biosynthesis; ko00620: Pyruvate metabolism; ko01210: 2-Oxocarboxylic acid metabolism; ko01230: Biosynthesis of amino acids	PREDICTED: 2-isopropylmalate synthase A-like [Ipomoea nil]	RecName: Full=2-isopropylmalate synthase B; EC=2.3.3.13; AltName: Full=Alpha-IPM synthase B; AltName: Full=Alpha-isopropylmalate synthase B;	SubName: Full=Putative 2-isopropylmalate synthase B-like {ECO:0000313|EMBL:JAP33399.1};	Alpha-isopropylmalate synthase/homocitrate synthase	GO:0003852,2-isopropylmalate synthase activity; GO:0009098,leucine biosynthetic process	PF08502.10:LeuA allosteric (dimerisation) domain
g11790	5.18	5.13	8.92	5.7	3.7	3.75	10.75	6.9	9.67	11.95	13.67	9.29	5.87	10.89	8.38	128	178	351	156	124	101	279	170	235	340	377	254	169	324	247	LG3	17623903	17629610	+	K05956 geranylgeranyl transferase type-2 subunit beta [EC:2.5.1.60] | (RefSeq) geranylgeranyl transferase type-2 subunit beta 1 (A)	--	PREDICTED: geranylgeranyl transferase type-2 subunit beta 1 [Ipomoea nil]	RecName: Full=Geranylgeranyl transferase type-2 subunit beta 1 {ECO:0000305}; EC=2.5.1.60 {ECO:0000269|PubMed:20180921}; AltName: Full=Geranylgeranyl transferase type II subunit beta 1 {ECO:0000305}; AltName: Full=Rab geranylgeranyl transferase beta subunit 1 {ECO:0000303|PubMed:20180921}; Short=AtRGTB1 {ECO:0000303|PubMed:20180921}; Short=Rab-GGT beta 1 {ECO:0000305};	SubName: Full=geranylgeranyl transferase type-2 subunit beta-like {ECO:0000313|RefSeq:XP_016470713.1};	Protein geranylgeranyltransferase type II, beta subunit	GO:0005829,cytosol; GO:0005968,Rab-protein geranylgeranyltransferase complex; GO:0046872,metal ion binding; GO:0004663,Rab geranylgeranyltransferase activity; GO:0009555,pollen development; GO:0018344,protein geranylgeranylation; GO:0048364,root development	PF00432.21:Prenyltransferase and squalene oxidase repeat
g11798	1.12	0.46	0	0	0.1	0.08	1.19	0.35	0	2.47	1.08	0.47	1.18	1.4	1.29	26	15	0	0	3	2	29	8	0	66	28	12	32	39	36	LG3	17683921	17685528	-	--	--	PREDICTED: UPF0481 protein At3g47200-like isoform X1 [Ipomoea nil]	RecName: Full=UPF0481 protein At3g47200;	SubName: Full=putative UPF0481 protein At3g02645 isoform X2 {ECO:0000313|RefSeq:XP_016472130.1};	--	GO:0016021,integral component of membrane; GO:0005886,plasma membrane	PF03140.15:Plant protein of unknown function
g11800	0	0.85	0	0.42	1.1	1.21	1.26	0.98	1.43	4.66	2.71	1.12	3.88	4.28	4.08	0	28	0	11	35	31	31	23	33	126	71	29	106	121	114	LG3	17704185	17709807	+	K09522 DnaJ homolog subfamily C member 2 | (RefSeq) dnaJ homolog subfamily C member 2-like (A)	--	PREDICTED: transcription factor DIVARICATA-like isoform X2 [Ipomoea nil]	RecName: Full=Transcription factor SRM1 {ECO:0000305}; AltName: Full=Myb-related protein SRM1 {ECO:0000305}; AltName: Full=Protein SALT-RELATED MYB 1 {ECO:0000303|PubMed:26243618};	SubName: Full=Protein RADIALIS-like 6 {ECO:0000313|EMBL:PHU25110.1};	Zuotin and related molecular chaperones (DnaJ superfamily), contains DNA-binding domains	GO:0005634,nucleus; GO:0003677,DNA binding; GO:0003700,DNA-binding transcription factor activity; GO:0009738,abscisic acid-activated signaling pathway; GO:1901001,negative regulation of response to salt stress; GO:0010116,positive regulation of abscisic acid biosynthetic process; GO:1905615,positive regulation of developmental vegetative growth; GO:0045893,positive regulation of transcription, DN…	PF00249.31:Myb-like DNA-binding domain
g11801	2.95	4.05	1.27	0.33	0.08	0	0.84	3.58	0.79	1.8	2.92	0	4.97	6.48	5.725	57	110	39	7	2	0	17	69	15	40	63	0	112	151	132	LG3	17712031	17713370	-	--	--	PREDICTED: UPF0481 protein At3g47200-like isoform X2 [Ipomoea nil]	RecName: Full=UPF0481 protein At3g47200;	SubName: Full=UPF0481 protein At3g47200-like isoform X3 {ECO:0000313|RefSeq:XP_009789237.1};	--	GO:0016021,integral component of membrane; GO:0005886,plasma membrane	PF03140.15:Plant protein of unknown function
g11807	0.58	1.62	0.9	1.63	5.9	2.51	6.54	6.54	4.79	4.57	6.82	7.44	6.69	5.03	5.86	25	98	62	78	345	118	296	281	203	227	328	355	336	261	299	LG3	17746131	17752390	-	K13126 polyadenylate-binding protein | (RefSeq) uncharacterized LOC109160086 (A)	ko03013: RNA transport; ko03015: mRNA surveillance pathway; ko03018: RNA degradation	PREDICTED: uncharacterized protein LOC109160086 isoform X3 [Ipomoea nil]	RecName: Full=Polyadenylate-binding protein 2; Short=PABP-2; Short=Poly(A)-binding protein 2;	RecName: Full=Polyadenylate-binding protein {ECO:0000256|RuleBase:RU362004}; Short=PABP {ECO:0000256|RuleBase:RU362004};	Polyadenylate-binding protein (RRM superfamily)	GO:0005829,cytosol; GO:0005634,nucleus; GO:0003729,mRNA binding; GO:0003743,translation initiation factor activity; GO:0000184,nuclear-transcribed mRNA catabolic process, nonsense-mediated decay; GO:1900151,regulation of nuclear-transcribed mRNA catabolic process, deadenylation-dependent decay; GO:0060211,regulation of nuclear-transcribed mRNA poly(A) tail shortening; GO:0006446,regulation of tra…	PF00076.22:RNA recognition motif. (a.k.a. RRM, RBD, or RNP domain)
g11808	191.38	275.32	244.98	123.19	60.14	112.67	108.76	82.91	103.61	173.62	181.51	197.98	426.31	442.79	434.55	2770	5599	5648	1974	1181	1777	1654	1197	1475	2894	2932	3171	7191	7718	7455	LG3	17753489	17755240	-	--	--	PREDICTED: uncharacterized protein LOC109159883 [Ipomoea nil]	--	--	--	--	--
g1181	1.68	5.5	1.5	3.07	7.24	5.59	0	1.89	1.67	2.37	0.38	0	1.05	2.09	1.57	40	184	57	81	234	145	0	45	39	65	10	0	29	60	45	LG1	7067321	7074075	+	K23678 solute carrier family 66 (lysosomal lysine-arginine transporter), member 1 | (RefSeq) probable vacuolar amino acid transporter YPQ1 (A)	--	PREDICTED: probable vacuolar amino acid transporter YPQ1 [Ipomoea nil]	--	SubName: Full=lysosomal amino acid transporter 1 homolog isoform X2 {ECO:0000313|RefSeq:XP_009764843.1};	Predicted membrane protein	GO:0016021,integral component of membrane	PF04193.14:PQ loop repeat
g11810	4.98	7.67	7.78	0	0.6	0.65	6.09	0	0.1	10.23	12.75	16.07	7.5	3.46	5.48	49	106	122	0	8	7	63	0	1	116	140	175	86	41	64	LG3	17762229	17762910	-	K13379 reversibly glycosylated polypeptide / UDP-arabinopyranose mutase [EC:2.4.1.- 5.4.99.30] | (RefSeq) UDP-arabinopyranose mutase 1 (A)	ko00520: Amino sugar and nucleotide sugar metabolism	PREDICTED: UDP-arabinopyranose mutase 1 [Ipomoea nil]	RecName: Full=UDP-arabinopyranose mutase 3 {ECO:0000303|PubMed:17182701}; Short=OsUAM3 {ECO:0000303|PubMed:17182701}; EC=5.4.99.30 {ECO:0000269|PubMed:17182701, ECO:0000269|PubMed:20057139, ECO:0000269|PubMed:20149347}; AltName: Full=Reversibly glycosylated polypeptide 3 {ECO:0000303|PubMed:17182701}; AltName: Full=UDP-L-arabinose mutase 3 {ECO:0000305};	SubName: Full=UDP-arabinopyranose mutase 3 {ECO:0000313|RefSeq:XP_009758723.1};	--	GO:0005829,cytosol; GO:0005794,Golgi apparatus; GO:0016866,intramolecular transferase activity; GO:0052691,UDP-arabinopyranose mutase activity; GO:0071555,cell wall organization; GO:0009832,plant-type cell wall biogenesis; GO:0033356,UDP-L-arabinose metabolic process	PF03214.13:Reversibly glycosylated polypeptide
g11811	6.26	11.39	5.87	4.58	3.47	4.54	7.01	6.71	7.13	15.78	16.89	22.83	6.59	7.83	7.21	158	404	236	128	119	125	186	169	177	459	476	638	194	238	216	LG3	17765229	17768630	-	K15639 PHYB activation tagged suppressor 1 [EC:1.14.-.-] | (RefSeq) cytochrome P450 CYP749A22-like (A)	ko00905: Brassinosteroid biosynthesis	PREDICTED: cytochrome P450 CYP749A22-like [Ipomoea nil]	RecName: Full=Cytochrome P450 CYP749A22; EC=1.14.-.-; AltName: Full=Cytochrome P450 CYP749A20;	SubName: Full=cytochrome P450 CYP749A22-like isoform X1 {ECO:0000313|RefSeq:XP_016460535.1};	Cytochrome P450 CYP4/CYP19/CYP26 subfamilies	GO:0016021,integral component of membrane; GO:0020037,heme binding; GO:0005506,iron ion binding; GO:0004497,monooxygenase activity; GO:0016705,oxidoreductase activity, acting on paired donors, with incorporation or reduction of molecular oxygen	PF00067.22:Cytochrome P450
g11812	25.61	35.25	31.56	42.08	19.49	36.04	57.79	48.39	53.62	155.5	150.47	190.34	83.73	69.16	76.445	487	942	956	886	503	747	1155	918	1003	3406	3194	4006	1856	1584	1720	LG3	17771853	17774280	-	--	--	PREDICTED: uncharacterized protein LOC109159883 [Ipomoea nil]	--	--	--	--	--
g11813	9.6	14.73	13.21	18.92	32.85	19.12	20.77	21.68	29.14	29.51	34.42	33.58	18.55	15.14	16.845	427	921	936	932	1983	927	971	962	1275	1512	1709	1653	962	811	887	LG3	17783757	17787600	-	K13126 polyadenylate-binding protein | (RefSeq) uncharacterized LOC109160086 (A)	ko03013: RNA transport; ko03015: mRNA surveillance pathway; ko03018: RNA degradation	PREDICTED: uncharacterized protein LOC109160086 isoform X3 [Ipomoea nil]	RecName: Full=Polyadenylate-binding protein 2; Short=PABP-2; Short=Poly(A)-binding protein 2;	RecName: Full=Polyadenylate-binding protein {ECO:0000256|RuleBase:RU362004}; Short=PABP {ECO:0000256|RuleBase:RU362004};	Polyadenylate-binding protein (RRM superfamily)	GO:0005829,cytosol; GO:0005634,nucleus; GO:0003729,mRNA binding; GO:0003743,translation initiation factor activity; GO:0000184,nuclear-transcribed mRNA catabolic process, nonsense-mediated decay; GO:1900151,regulation of nuclear-transcribed mRNA catabolic process, deadenylation-dependent decay; GO:0060211,regulation of nuclear-transcribed mRNA poly(A) tail shortening; GO:0006446,regulation of tra…	PF00076.22:RNA recognition motif. (a.k.a. RRM, RBD, or RNP domain)
g11816	40.89	69.4	88.88	45.94	26.82	46.53	59.37	67.98	55.98	110.04	104.82	112.58	57.86	60.65	59.255	1071	2554	3708	1332	953	1328	1634	1776	1442	3319	3064	3263	1766	1913	1840	LG3	17807474	17811540	-	K15639 PHYB activation tagged suppressor 1 [EC:1.14.-.-] | (RefSeq) cytochrome P450 CYP749A22-like (A)	ko00905: Brassinosteroid biosynthesis	PREDICTED: cytochrome P450 CYP749A22-like [Ipomoea nil]	RecName: Full=Cytochrome P450 CYP749A22; EC=1.14.-.-; AltName: Full=Cytochrome P450 CYP749A20;	SubName: Full=Cytochrome {ECO:0000313|EMBL:PHT33690.1};	Cytochrome P450 CYP4/CYP19/CYP26 subfamilies	GO:0016021,integral component of membrane; GO:0020037,heme binding; GO:0005506,iron ion binding; GO:0004497,monooxygenase activity; GO:0016705,oxidoreductase activity, acting on paired donors, with incorporation or reduction of molecular oxygen	PF00067.22:Cytochrome P450
g11817	54.53	72.51	43.81	89.53	23.55	46.87	194.5	188.62	196.43	324.54	386.96	338.38	253.66	262.04	257.85	790	1476	1011	1436	463	740	2961	2726	2799	5415	6257	5425	4283	4572	4428	LG3	17814111	17816210	-	--	--	PREDICTED: uncharacterized protein LOC109159883 [Ipomoea nil]	--	--	--	--	--
g11818	0.84	1.36	0.14	6.07	10.96	4.21	5.16	1.94	3.49	17.04	16.93	14.89	3.01	4.21	3.61	33	75	9	264	584	180	213	76	135	771	742	647	138	199	169	LG3	17825750	17829470	-	K13126 polyadenylate-binding protein | (RefSeq) uncharacterized LOC109160086 (A)	ko03013: RNA transport; ko03015: mRNA surveillance pathway; ko03018: RNA degradation	PREDICTED: uncharacterized protein LOC109160086 isoform X3 [Ipomoea nil]	RecName: Full=Polyadenylate-binding protein 2; Short=PABP-2; Short=Poly(A)-binding protein 2;	RecName: Full=Polyadenylate-binding protein {ECO:0000256|RuleBase:RU362004}; Short=PABP {ECO:0000256|RuleBase:RU362004};	Polyadenylate-binding protein (RRM superfamily)	GO:0005829,cytosol; GO:0005634,nucleus; GO:0003729,mRNA binding; GO:0003743,translation initiation factor activity; GO:0000184,nuclear-transcribed mRNA catabolic process, nonsense-mediated decay; GO:1900151,regulation of nuclear-transcribed mRNA catabolic process, deadenylation-dependent decay; GO:0060211,regulation of nuclear-transcribed mRNA poly(A) tail shortening; GO:0006446,regulation of tra…	PF00076.22:RNA recognition motif. (a.k.a. RRM, RBD, or RNP domain)
g11819	24	30.72	24.41	19.35	8.63	18.38	19.53	19.4	20.36	61	49.62	45.26	40.73	30.29	35.51	531	955	860	474	259	443	454	428	443	1554	1225	1108	1050	807	929	LG3	17835264	17840290	-	K03030 26S proteasome regulatory subunit N11 | (RefSeq) 26S proteasome non-ATPase regulatory subunit 14 homolog (A)	ko03050: Proteasome	PREDICTED: uncharacterized protein LOC109159883 [Ipomoea nil]	RecName: Full=26S proteasome non-ATPase regulatory subunit 14 homolog; EC=3.4.19.-; AltName: Full=26S proteasome regulatory subunit RPN11; Short=AtRPN11;	SubName: Full=26S proteasome non-ATPase regulatory subunit 14 homolog {ECO:0000313|RefSeq:XP_018853161.1};	26S proteasome regulatory complex, subunit RPN11	GO:0005829,cytosol; GO:0005634,nucleus; GO:0000502,proteasome complex; GO:0061578,Lys63-specific deubiquitinase activity; GO:0046872,metal ion binding; GO:0008237,metallopeptidase activity; GO:0030163,protein catabolic process; GO:0009651,response to salt stress	--
g11822	28.39	43.07	38.05	2.94	4.43	4.42	55.01	55.62	59.63	138.96	120.95	132.05	58.93	54.21	56.57	637	1358	1360	73	135	108	1297	1245	1316	3591	3029	3279	1541	1465	1503	LG3	17861099	17863934	-	K15639 PHYB activation tagged suppressor 1 [EC:1.14.-.-] | (RefSeq) cytochrome P450 CYP749A22-like (A)	ko00905: Brassinosteroid biosynthesis	PREDICTED: cytochrome P450 CYP749A22-like [Ipomoea nil]	RecName: Full=Cytochrome P450 CYP749A22; EC=1.14.-.-; AltName: Full=Cytochrome P450 CYP749A20;	SubName: Full=Cytochrome {ECO:0000313|EMBL:PHT33690.1};	Cytochrome P450 CYP4/CYP19/CYP26 subfamilies	GO:0016021,integral component of membrane; GO:0020037,heme binding; GO:0005506,iron ion binding; GO:0004497,monooxygenase activity; GO:0016705,oxidoreductase activity, acting on paired donors, with incorporation or reduction of molecular oxygen	PF00067.22:Cytochrome P450
g11823	11.73	4.93	13.04	23.8	31.5	15.62	36.24	18.62	38.35	8.46	25.13	10.92	23.94	33.73	28.835	166	98	294	373	605	241	539	263	534	138	397	171	395	575	485	LG3	17868870	17870794	-	K00454 lipoxygenase [EC:1.13.11.12] | (RefSeq) lipoxygenase 6, chloroplastic (A)	ko00591: Linoleic acid metabolism; ko00592: alpha-Linolenic acid metabolism	PREDICTED: lipoxygenase 6, chloroplastic [Ipomoea nil]	--	--	--	--	--
g11824	5.77	2.64	5.81	2.87	4.56	2.81	20.02	16.01	18.63	0.87	1.37	2.18	15.22	23.58	19.4	98	63	157	54	105	52	357	271	311	17	26	41	301	482	392	LG3	17878045	17881434	-	--	--	--	--	--	--	--	--
g11825	0	0	3.06	0.29	0.08	1.39	0	0	0	2.45	2.92	0.1	1.21	3.24	2.225	0	0	45	3	1	14	0	0	0	26	30	1	13	36	25	LG3	17882999	17884277	+	K13126 polyadenylate-binding protein | (RefSeq) uncharacterized LOC109160086 (A)	ko03013: RNA transport; ko03015: mRNA surveillance pathway; ko03018: RNA degradation	PREDICTED: uncharacterized protein LOC109160086 isoform X7 [Ipomoea nil]	--	--	--	--	--
g11828	2.01	3.32	2.43	1.64	1.48	3.03	0	0	0	0.52	0.69	0	0.48	1.9	1.19	50	116	96	45	50	82	0	0	0	15	19	0	14	57	36	LG3	17906349	17909386	+	K13126 polyadenylate-binding protein | (RefSeq) uncharacterized LOC109160086 (A)	ko03013: RNA transport; ko03015: mRNA surveillance pathway; ko03018: RNA degradation	PREDICTED: uncharacterized protein LOC109160086 isoform X6 [Ipomoea nil]	RecName: Full=Polyadenylate-binding protein 2; Short=PABP-2; Short=Poly(A)-binding protein 2;	SubName: Full=Uncharacterized protein {ECO:0000313|EMBL:KCW55175.1};	Polyadenylate-binding protein (RRM superfamily)	GO:0005829,cytosol; GO:0005634,nucleus; GO:0003729,mRNA binding; GO:0003743,translation initiation factor activity; GO:0000184,nuclear-transcribed mRNA catabolic process, nonsense-mediated decay; GO:1900151,regulation of nuclear-transcribed mRNA catabolic process, deadenylation-dependent decay; GO:0060211,regulation of nuclear-transcribed mRNA poly(A) tail shortening; GO:0006446,regulation of tra…	PF00076.22:RNA recognition motif. (a.k.a. RRM, RBD, or RNP domain)
g11829	0	0	0.57	0.18	0.47	0.31	0.3	0.48	0.67	0	0	0.49	0	0.02	0.01	0	0	40	9	28	15	14	21	29	0	0	24	0	1	1	LG3	17911468	17919194	-	K11254 histone H4 | (RefSeq) histone H4 (A)	--	PREDICTED: protein RRNAD1 [Ipomoea nil]	RecName: Full=Histone H4;	SubName: Full=Uncharacterized protein {ECO:0000313|EMBL:CDP08973.1};	Histone H4	GO:0000786,nucleosome; GO:0005634,nucleus; GO:0003677,DNA binding; GO:0046982,protein heterodimerization activity; GO:0006334,nucleosome assembly	--
g1183	3.27	4.91	0	0.38	0.27	0.5	0.06	0	3.82	2.52	2.23	4.93	0.52	1.06	0.79	54	114	0	7	6	9	1	0	62	48	41	90	10	21	16	LG1	7081281	7083207	+	--	--	PREDICTED: protein DA1-related 1 isoform X3 [Elaeis guineensis]	RecName: Full=Protein DA1-related 1;	SubName: Full=Uncharacterized protein {ECO:0000313|EMBL:CDP02419.1};	Adaptor protein Enigma and related PDZ-LIM proteins	GO:0005886,plasma membrane; GO:0046872,metal ion binding; GO:0043130,ubiquitin binding	PF12315.8:Protein DA1
g11830	4.13	6.23	6.11	2.35	3.44	2.27	0.13	0.4	0	1.91	1.85	6.37	0.31	2.27	1.29	92	195	217	58	104	55	3	9	0	49	46	157	8	61	35	LG3	17928979	17936356	+	--	--	PREDICTED: uncharacterized protein LOC109160078 [Ipomoea nil]	RecName: Full=UPF0481 protein At3g47200;	SubName: Full=UPF0481 protein At3g47200-like isoform X3 {ECO:0000313|RefSeq:XP_009789237.1};	--	GO:0016021,integral component of membrane; GO:0005886,plasma membrane	PF03140.15:Plant protein of unknown function
g11831	6.23	3.25	6.77	1.47	0.7	0.58	0	0	0	4.42	2.12	0.83	0.64	1.88	1.26	176	129	305	46	27	18	0	0	0	144	67	26	21	64	43	LG3	17938338	17943014	-	K09458 3-oxoacyl-[acyl-carrier-protein] synthase II [EC:2.3.1.179] | (RefSeq) 3-oxoacyl-[acyl-carrier-protein] synthase I, chloroplastic-like (A)	ko00061: Fatty acid biosynthesis; ko00780: Biotin metabolism; ko01212: Fatty acid metabolism	PREDICTED: uncharacterized protein LOC109160078 [Ipomoea nil]	RecName: Full=UPF0481 protein At3g47200;	SubName: Full=UPF0481 protein At3g47200-like {ECO:0000313|RefSeq:XP_016450568.1};	--	GO:0016021,integral component of membrane; GO:0005886,plasma membrane	PF03140.15:Plant protein of unknown function
g11839	16.58	30.74	30.09	19.46	15.02	27.32	33.79	33.01	37.66	82.26	58.89	76.42	46.4	47.34	46.87	367	956	1061	477	451	659	786	729	820	2097	1455	1872	1197	1262	1230	LG3	18009727	18012724	-	K15639 PHYB activation tagged suppressor 1 [EC:1.14.-.-] | (RefSeq) cytochrome P450 CYP749A22-like (A)	ko00905: Brassinosteroid biosynthesis	PREDICTED: cytochrome P450 CYP749A22-like [Ipomoea nil]	RecName: Full=Cytochrome P450 CYP749A22; EC=1.14.-.-; AltName: Full=Cytochrome P450 CYP749A20;	SubName: Full=cytochrome P450 CYP749A22-like {ECO:0000313|RefSeq:XP_016460904.1};	Cytochrome P450 CYP4/CYP19/CYP26 subfamilies	GO:0016021,integral component of membrane; GO:0020037,heme binding; GO:0005506,iron ion binding; GO:0004497,monooxygenase activity; GO:0016705,oxidoreductase activity, acting on paired donors, with incorporation or reduction of molecular oxygen	PF00067.22:Cytochrome P450
g11842	0	0.55	0	0	0.48	0	4.28	2.31	0	0	0.69	1.5	0	0	0	0	13	0	0	11	0	76	39	0	0	13	28	0	0	0	LG3	18025568	18030996	-	K18655 ATP-dependent RNA helicase DDX19/DBP5 [EC:3.6.4.13] | (RefSeq) DEAD-box ATP-dependent RNA helicase 38-like (A)	ko03013: RNA transport; ko03015: mRNA surveillance pathway	PREDICTED: uncharacterized protein LOC109181117 [Ipomoea nil]	--	--	--	--	--
g1185	2.14	1.38	0.1	0.05	1.17	0.19	5.58	8.64	1.3	3.1	6.49	4.52	3.28	3.43	3.355	42	38	3	1	31	4	115	169	25	70	142	98	75	81	78	LG1	7087461	7090881	+	--	--	PREDICTED: uncharacterized protein LOC109188901 [Ipomoea nil]	--	SubName: Full=protein YeeZ-like isoform X1 {ECO:0000313|RefSeq:XP_016508662.1};	Putative NAD+-dependent epimerases	--	PF01370.21:NAD dependent epimerase/dehydratase family
g11851	0.84	1.16	1.52	0.8	0.4	1	1.97	0	0	1.97	1.77	2.63	0	0.33	0.165	17	33	49	18	11	22	42	0	0	46	40	59	0	8	4	LG3	18079292	18082516	-	K10357 myosin V | (RefSeq) myosin-2 (A)	--	PREDICTED: myosin-1-like [Ipomoea nil]	RecName: Full=Myosin-1; AltName: Full=AtATM1;	SubName: Full=Uncharacterized protein {ECO:0000313|EMBL:ABK94124.1};	Myosin class V heavy chain	GO:0005783,endoplasmic reticulum; GO:0005768,endosome; GO:0016459,myosin complex; GO:0009524,phragmoplast; GO:0009506,plasmodesma; GO:0003779,actin binding; GO:0005524,ATP binding; GO:0005516,calmodulin binding; GO:0003774,motor activity; GO:0006897,endocytosis	--
g11852	0	0.71	0.61	0.61	0.75	0.57	0.3	0	0	0.24	0.31	0	0	0.17	0.085	0	55	53	37	56	34	17	0	0	15	19	0	0	11	6	LG3	18084044	18094456	-	K10357 myosin V | (RefSeq) myosin-2-like (A)	--	PREDICTED: protein SIEVE ELEMENT OCCLUSION B-like [Ipomoea nil]	RecName: Full=Myosin-1; AltName: Full=AtATM1;	SubName: Full=Uncharacterized protein {ECO:0000313|EnsemblPlants:Bo5g112310.1};	Myosin class V heavy chain	GO:0005783,endoplasmic reticulum; GO:0005768,endosome; GO:0016459,myosin complex; GO:0009524,phragmoplast; GO:0009506,plasmodesma; GO:0003779,actin binding; GO:0005524,ATP binding; GO:0005516,calmodulin binding; GO:0003774,motor activity; GO:0006897,endocytosis	PF14577.6:Sieve element occlusion C-terminus
g11856	2.24	2.23	4.21	9.09	12.41	10.53	10	3.36	11.67	3.3	8.15	4.85	5.43	2.29	3.86	30	42	90	135	226	154	141	45	154	51	122	72	85	37	61	LG3	18132711	18133802	+	--	--	--	--	--	--	--	--
g11859	2.07	1.47	5.35	0	1.47	2.49	1.44	2.48	2.92	0	4.42	4.75	0	0.26	0.13	26	26	107	0	25	34	19	31	36	0	62	66	0	4	2	LG3	18150841	18152036	-	--	--	PREDICTED: uncharacterized protein LOC109160047 [Ipomoea nil]	--	SubName: Full=Uncharacterized protein {ECO:0000313|EnsemblPlants:PGSC0003DMT400058669};	Membrane-associated proteoglycan Leprecan	--	--
g11860	9.63	13.75	5.85	19.61	22.55	21.89	9.76	12.75	9.92	28.86	18.44	29.8	17.39	15.52	16.455	153	307	148	345	486	379	163	202	155	528	327	524	322	297	310	LG3	18152859	18154496	-	K00587 protein-S-isoprenylcysteine O-methyltransferase [EC:2.1.1.100] | (RefSeq) protein-S-isoprenylcysteine O-methyltransferase B-like (A)	ko00900: Terpenoid backbone biosynthesis	PREDICTED: protein-S-isoprenylcysteine O-methyltransferase B-like isoform X2 [Ipomoea nil]	RecName: Full=Protein-S-isoprenylcysteine O-methyltransferase B; Short=AtICMTB; EC=2.1.1.100; AltName: Full=Isoprenylcysteine carboxylmethyltransferase B; AltName: Full=Prenylated protein carboxyl methyltransferase B; AltName: Full=Prenylcysteine carboxyl methyltransferase B;	RecName: Full=Protein-S-isoprenylcysteine O-methyltransferase {ECO:0000256|RuleBase:RU362022}; EC=2.1.1.100 {ECO:0000256|RuleBase:RU362022};	Farnesyl cysteine-carboxyl methyltransferase	GO:0005783,endoplasmic reticulum; GO:0005789,endoplasmic reticulum membrane; GO:0016021,integral component of membrane; GO:0004671,protein C-terminal S-isoprenylcysteine carboxyl O-methyltransferase activity; GO:0009908,flower development; GO:0009788,negative regulation of abscisic acid-activated signaling pathway; GO:0048367,shoot system development	PF04140.14:Isoprenylcysteine carboxyl methyltransferase (ICMT) family
g11863	57.9	76.71	67.67	62.82	28.43	60.27	40.16	31.98	24.72	75.64	68.52	54.39	41.57	38.97	40.27	686	1277	1277	824	457	778	500	378	288	1032	906	713	574	556	565	LG3	18175072	18176616	-	K04797 prefoldin alpha subunit | (RefSeq) probable prefoldin subunit 5 (A)	--	PREDICTED: probable prefoldin subunit 5 [Ipomoea nil]	RecName: Full=Probable prefoldin subunit 5;	SubName: Full=Prefoldin subunit, putative {ECO:0000313|EMBL:EEF41462.1};	Molecular chaperone Prefoldin, subunit 5	GO:0005829,cytosol; GO:0016272,prefoldin complex; GO:0051082,unfolded protein binding; GO:0006457,protein folding; GO:0006355,regulation of transcription, DNA-templated	--
g11864	9.43	14.3	9.73	18.53	20.81	17.13	23.57	25.51	13.92	23.6	20.24	30.02	18.54	16.94	17.74	250	533	411	544	749	495	657	675	363	721	599	881	573	541	557	LG3	18180111	18181948	+	K16221 transcription factor TCP21 (protein CCA1 HIKING EXPEDITION) | (RefSeq) transcription factor TCP7-like (A)	ko04712: Circadian rhythm - plant	PREDICTED: transcription factor TCP7-like [Ipomoea nil]	RecName: Full=Transcription factor TCP7;	SubName: Full=transcription factor TCP7-like {ECO:0000313|RefSeq:XP_009789878.1};	--	GO:0005634,nucleus; GO:0003677,DNA binding; GO:0003700,DNA-binding transcription factor activity; GO:0006355,regulation of transcription, DNA-templated; GO:0006351,transcription, DNA-templated	PF03634.13:TCP family transcription factor
g11867	0.09	0.09	0	0	0	0	0	0	0	0	0.38	0.85	0.23	1.21	0.72	3	4	0	0	0	0	0	0	0	0	14	31	9	48	29	LG3	18193682	18200956	-	--	--	PREDICTED: subtilisin-like protease SBT5.6 [Ipomoea nil]	RecName: Full=Subtilisin-like protease SBT5.6 {ECO:0000303|PubMed:16193095}; EC=3.4.21.- {ECO:0000255|PROSITE-ProRule:PRU10082}; AltName: Full=Subtilase subfamily 5 member 6 {ECO:0000303|PubMed:16193095}; Short=AtSBT5.6 {ECO:0000303|PubMed:16193095}; Flags: Precursor;	SubName: Full=subtilisin-like protease SBT5.3 {ECO:0000313|RefSeq:XP_009768078.1};	--	GO:0005576,extracellular region; GO:0004252,serine-type endopeptidase activity	PF00082.22:Subtilase family
g11869	2.08	2.98	2.14	3.08	7.74	6.58	2.12	4.49	9.47	6.76	5.52	6.64	8.91	7.13	8.02	72	145	118	118	363	248	77	155	322	269	213	254	359	297	328	LG3	18213989	18219122	-	K17710 pentatricopeptide repeat domain-containing protein 1 | (RefSeq) putative pentatricopeptide repeat-containing protein At2g02150 (A)	--	PREDICTED: pentatricopeptide repeat-containing protein At1g13040, mitochondrial [Ipomoea nil]	RecName: Full=Pentatricopeptide repeat-containing protein At1g13040, mitochondrial; Flags: Precursor;	SubName: Full=Putative pentatricopeptide repeat-containing protein, mitochondrial-like {ECO:0000313|EMBL:JAP35636.1};	FOG: PPR repeat	GO:0043231,intracellular membrane-bounded organelle; GO:0005739,mitochondrion; GO:0005774,vacuolar membrane; GO:0004519,endonuclease activity; GO:0003723,RNA binding; GO:0009451,RNA modification	PF13041.6:PPR repeat family
g11871	2.58	2.35	2.94	2.74	5.75	1.74	4.33	2.78	3.78	2.06	1.75	1.37	2.95	2.35	2.65	136	174	247	160	411	100	240	146	196	125	103	80	181	149	165	LG3	18220477	18224129	+	K17710 pentatricopeptide repeat domain-containing protein 1 | (RefSeq) putative pentatricopeptide repeat-containing protein At2g02150 (A)	--	PREDICTED: pentatricopeptide repeat-containing protein At1g73710 [Ipomoea nil]	RecName: Full=Pentatricopeptide repeat-containing protein At1g73710;	SubName: Full=Pentatricopeptide repeat-containing protein {ECO:0000313|EMBL:PHU12297.1};	FOG: PPR repeat	GO:0043231,intracellular membrane-bounded organelle; GO:0004519,endonuclease activity; GO:0003723,RNA binding; GO:0009451,RNA modification	PF13041.6:PPR repeat family
g11873	19.03	23.63	20.51	8.92	10.18	8.25	44.07	36.49	44.8	3.93	5.65	5.73	3.32	2.08	2.7	576	1005	989	299	418	272	1402	1102	1334	137	191	192	117	76	97	LG3	18227107	18230863	+	--	--	PREDICTED: uncharacterized protein LOC109160126 [Ipomoea nil]	RecName: Full=Chaperone protein dnaJ C76, chloroplastic {ECO:0000305}; Short=atDjC76 {ECO:0000303|PubMed:23894646}; AltName: Full=AtDjC17 {ECO:0000303|PubMed:25339971}; AltName: Full=AtJ17 {ECO:0000305}; Flags: Precursor;	SubName: Full=Uncharacterized protein {ECO:0000313|EMBL:CDP14399.1};	Molecular chaperone (DnaJ superfamily)	GO:0009507,chloroplast	PF00226.31:DnaJ domain
g1188	3.85	4.02	3.86	7.4	9.24	8.15	5.05	5.32	1.49	4.27	7.79	2.71	17.55	12.87	15.21	100	147	160	213	326	231	138	138	38	128	226	78	532	403	468	LG1	7099313	7101226	-	--	--	PREDICTED: UPF0496 protein 1-like [Ipomoea nil]	RecName: Full=UPF0496 protein 1;	SubName: Full=Uncharacterized protein {ECO:0000313|EnsemblPlants:PGSC0003DMT400088126};	--	GO:0016021,integral component of membrane	PF05055.12:Protein of unknown function (DUF677)
g11880	11.22	20.47	7.34	21.38	11.28	20.54	12.94	10.39	12.71	29.18	20.44	24.95	13.46	12.63	13.045	236	605	246	498	322	471	286	218	263	707	480	581	330	320	325	LG3	18290557	18294861	+	K12859 U5 snRNP protein, DIM1 family | (RefSeq) thioredoxin-like protein YLS8 (A)	ko03040: Spliceosome	PREDICTED: nicotinamidase 2-like [Ipomoea nil]	RecName: Full=Thioredoxin-like protein YLS8; AltName: Full=Protein YELLOW-LEAF-SPECIFIC GENE 8;	SubName: Full=nicotinamidase 2-like {ECO:0000313|RefSeq:XP_016460046.1, ECO:0000313|RefSeq:XP_016460048.1, ECO:0000313|RefSeq:XP_016460049.1};	Component of the U4/U6.U5 snRNP/mitosis protein DIM1	GO:0005737,cytoplasm; GO:0005634,nucleus; GO:0005681,spliceosomal complex; GO:0046540,U4/U6 x U5 tri-snRNP complex; GO:0005682,U5 snRNP; GO:0000245,spliceosomal complex assembly	PF00857.20:Isochorismatase family
g11899	64.59	59.48	80.73	84.48	40.17	87.3	70.9	38.5	59.2	110.97	131.71	207.91	69.72	67.99	68.855	1453	1880	2893	2104	1226	2140	1676	864	1310	2875	3307	5176	1828	1842	1835	LG3	18424693	18427680	-	K02880 large subunit ribosomal protein L17e | (RefSeq) 60S ribosomal protein L17-2-like (A)	ko03010: Ribosome	PREDICTED: 60S ribosomal protein L17-2-like [Ipomoea nil]	RecName: Full=60S ribosomal protein L17-2;	SubName: Full=60S ribosomal protein L22 {ECO:0000313|EMBL:PIN26113.1};	60S ribosomal protein L22	GO:0022625,cytosolic large ribosomal subunit; GO:0022626,cytosolic ribosome; GO:0016020,membrane; GO:0005730,nucleolus; GO:0009506,plasmodesma; GO:0042788,polysomal ribosome; GO:0005773,vacuole; GO:0003735,structural constituent of ribosome; GO:0006412,translation	PF00237.19:Ribosomal protein L22p/L17e
g11901	55.12	46.82	72.37	130.41	35.61	118.14	9.39	14.58	7.88	4.51	18.27	6.61	1.19	1.88	1.535	754	900	1577	1975	661	1761	135	199	106	71	279	100	19	31	25	LG3	18439291	18441560	-	K02880 large subunit ribosomal protein L17e | (RefSeq) 60S ribosomal protein L17-2-like (A)	ko03010: Ribosome	PREDICTED: 60S ribosomal protein L17-2-like [Ipomoea nil]	RecName: Full=60S ribosomal protein L17-2;	SubName: Full=60S ribosomal protein L22 {ECO:0000313|EMBL:PIN05601.1};	60S ribosomal protein L22	GO:0022625,cytosolic large ribosomal subunit; GO:0022626,cytosolic ribosome; GO:0016020,membrane; GO:0005730,nucleolus; GO:0009506,plasmodesma; GO:0042788,polysomal ribosome; GO:0005773,vacuole; GO:0003735,structural constituent of ribosome; GO:0006412,translation	PF00237.19:Ribosomal protein L22p/L17e
g11904	0.35	0	0	0.64	0.88	0	0.67	1.58	2.48	0	0	0	0.37	0.68	0.525	13	0	0	26	44	0	26	58	90	0	0	0	16	30	23	LG3	18451447	18457040	-	--	--	PREDICTED: protein SIEVE ELEMENT OCCLUSION B-like [Ipomoea nil]	RecName: Full=Protein SIEVE ELEMENT OCCLUSION B {ECO:0000303|PubMed:20932300}; Short=AtSEOb {ECO:0000303|PubMed:20932300}; AltName: Full=Protein SIEVE ELEMENT OCCLUSION-RELATED 1 {ECO:0000303|PubMed:22470058}; Short=AtSEOR1 {ECO:0000303|PubMed:22470058};	SubName: Full=uncharacterized protein LOC104218849 {ECO:0000313|RefSeq:XP_009767734.1};	--	GO:0042803,protein homodimerization activity; GO:0043621,protein self-association; GO:0010088,phloem development	PF14577.6:Sieve element occlusion C-terminus
g11905	0	0.78	0	0	0.33	0.3	0	0	0	1.77	1.62	1.08	1.08	0	0.54	0	34	0	0	14	10	0	0	0	63	56	37	39	0	20	LG3	18459110	18465270	-	K12742 isoprene synthase [EC:4.2.3.27] | (RefSeq) isoprene synthase, chloroplastic-like (A)	ko00900: Terpenoid backbone biosynthesis	PREDICTED: (-)-alpha-terpineol synthase-like [Ipomoea nil]	RecName: Full=(-)-alpha-terpineol synthase; EC=4.2.3.111;	SubName: Full=Uncharacterized protein {ECO:0000313|EMBL:CCB62296.1};	--	GO:0000287,magnesium ion binding; GO:0010333,terpene synthase activity; GO:0016114,terpenoid biosynthetic process	PF03936.16:Terpene synthase family, metal binding domain
g11909	32.66	34.01	25.26	41.42	92.95	39.45	38.4	33.51	30.24	13.43	12.03	9.87	48.97	62.21	55.59	1151	1684	1418	1616	4444	1515	1422	1178	1048	545	473	385	2011	2640	2326	LG3	18505145	18508521	+	K00737 beta-1,4-mannosyl-glycoprotein beta-1,4-N-acetylglucosaminyltransferase [EC:2.4.1.144] | (RefSeq) uncharacterized LOC109160247 (A)	ko00510: N-Glycan biosynthesis	PREDICTED: uncharacterized protein LOC109160247 [Ipomoea nil]	--	SubName: Full=uncharacterized protein LOC107799192 {ECO:0000313|RefSeq:XP_016477764.1};	--	GO:0016021,integral component of membrane; GO:0003830,beta-1,4-mannosylglycoprotein 4-beta-N-acetylglucosaminyltransferase activity; GO:0006487,protein N-linked glycosylation	PF04724.13:Glycosyltransferase family 17
g1191	20.23	9.56	19.45	8.86	3.96	5.89	6.42	4.18	2.17	5.52	7.02	6.64	1.6	6.15	3.875	369	245	565	179	98	117	123	76	39	116	143	134	34	135	85	LG1	7110393	7113766	-	K08360 cytochrome b-561 [EC:1.16.5.1] | (RefSeq) probable transmembrane ascorbate ferrireductase 2 (A)	--	putative transmembrane ascorbate ferrireductase 2 [Nicotiana attenuata]	RecName: Full=Probable transmembrane ascorbate ferrireductase 2; EC=1.16.5.1; AltName: Full=Cytochrome b561-1; Short=Artb561-2; Short=AtCytb561; AltName: Full=Protein b561A.tha4;	SubName: Full=Putative transmembrane ascorbate ferrireductase 2 {ECO:0000313|EMBL:OIT24739.1};	Cytochrome b	GO:0005794,Golgi apparatus; GO:0016021,integral component of membrane; GO:0046872,metal ion binding; GO:0016491,oxidoreductase activity; GO:0055114,oxidation-reduction process	PF03188.16:Eukaryotic cytochrome b561
g11910	15.52	25.53	6.79	16.03	13.55	14.44	6.1	9.77	4.31	13.62	14.24	17.33	11.64	24.81	18.225	293	677	204	335	347	297	121	184	80	296	300	362	256	564	410	LG3	18512445	18520037	+	--	--	--	--	--	--	--	--
g11912	2.96	2.99	0	0.78	0.07	0	0	2.97	0	16.68	5.14	5.36	0	0.32	0.16	31	44	0	9	1	0	0	31	0	201	60	62	0	4	2	LG3	18525957	18527220	-	--	--	PREDICTED: uncharacterized protein LOC109160340 [Ipomoea nil]	--	SubName: Full=uncharacterized protein LOC107794437 {ECO:0000313|RefSeq:XP_016472407.1};	--	GO:0016021,integral component of membrane	PF05212.12:Protein of unknown function (DUF707)
g11913	13.4	27.26	12.53	10.93	6.61	10.47	22.29	4.31	22.22	7.06	12.05	10.06	9.04	5.87	7.455	290	829	432	262	194	247	507	93	473	176	291	241	228	153	191	LG3	18527535	18530109	+	--	--	PREDICTED: zinc finger BED domain-containing protein RICESLEEPER 2-like [Ipomoea nil]	RecName: Full=Zinc finger BED domain-containing protein RICESLEEPER 2; AltName: Full=Transposase-like protein RICESLEEPER 2;	SubName: Full=zinc finger BED domain-containing protein RICESLEEPER 2-like {ECO:0000313|RefSeq:XP_010242103.1};	Tam3-transposase (Ac family)	GO:0005634,nucleus; GO:0003700,DNA-binding transcription factor activity; GO:0046872,metal ion binding; GO:0046983,protein dimerization activity; GO:0000977,RNA polymerase II regulatory region sequence-specific DNA binding; GO:0009791,post-embryonic development; GO:0006357,regulation of transcription by RNA polymerase II; GO:0006351,transcription, DNA-templated	PF05699.14:hAT family C-terminal dimerisation region
g11914	1.35	5.45	6.39	0.84	0.25	0	0	0	0	1.61	0	0	0	0	0	16	91	121	11	4	0	0	0	0	22	0	0	0	0	0	LG3	18530450	18532580	-	--	--	PREDICTED: uncharacterized protein LOC109160340 [Ipomoea nil]	--	SubName: Full=Uncharacterized protein {ECO:0000313|EMBL:KHN43983.1};	--	GO:0016021,integral component of membrane	PF05212.12:Protein of unknown function (DUF707)
g11915	2.2	2.23	3.8	3.01	1.87	3.08	0.79	4.83	0.81	2.39	0.81	1.09	0.66	1.14	0.9	80	114	220	121	92	122	30	175	29	100	33	44	28	50	39	LG3	18533179	18543560	-	--	--	PREDICTED: uncharacterized protein LOC107019256 [Solanum pennellii]	RecName: Full=GDSL esterase/lipase At3g26430; EC=3.1.1.-; AltName: Full=Extracellular lipase At3g26430; Flags: Precursor;	SubName: Full=Lipase, GDSL {ECO:0000313|EMBL:KVI05684.1};	--	GO:0005576,extracellular region; GO:0016298,lipase activity; GO:0016042,lipid catabolic process	PF00657.22:GDSL-like Lipase/Acylhydrolase
g11918	11.89	11.91	11.06	13.52	16.37	14.63	19.4	24.2	19.55	32.7	34.01	32.95	23.16	22.83	22.995	525	739	778	661	981	704	900	1066	849	1663	1676	1610	1192	1214	1203	LG3	18565407	18571389	+	K13150 coilin | (RefSeq) coilin-like (A)	--	PREDICTED: coilin-like isoform X1 [Ipomoea nil]	RecName: Full=Coilin {ECO:0000303|PubMed:16624863}; AltName: Full=Atcoilin {ECO:0000303|PubMed:16624863};	SubName: Full=Uncharacterized protein {ECO:0000313|EMBL:CDP13246.1};	--	GO:0015030,Cajal body; GO:0030619,U1 snRNA binding; GO:0030620,U2 snRNA binding; GO:0006396,RNA processing	PF15862.5:Coilin N-terminus
g11919	15.26	4.46	5.39	1.48	2.37	0.43	1.11	5.65	3.65	2.21	3.67	1.59	5.86	4.7	5.28	485	199	273	52	102	15	37	179	114	81	130	56	217	180	199	LG3	18582857	18586131	+	--	--	PREDICTED: BTB/POZ domain-containing protein At1g67900-like [Ipomoea nil]	RecName: Full=BTB/POZ domain-containing protein At1g67900;	SubName: Full=BTB/POZ domain-containing protein At1g67900-like {ECO:0000313|RefSeq:XP_009770852.1};	--	GO:0016567,protein ubiquitination	PF03000.14:NPH3 family
g1192	11.45	22.93	13.69	13.71	28.71	12.43	21.97	22.74	23.78	9.28	13.77	10.57	17.71	15.73	16.72	713	2006	1358	945	2425	843	1437	1412	1456	665	957	728	1285	1179	1232	LG1	7115471	7122807	+	--	--	PREDICTED: protein CROWDED NUCLEI 1 [Ipomoea nil]	RecName: Full=Protein CROWDED NUCLEI 1 {ECO:0000303|PubMed:24308514}; AltName: Full=Protein KAKU2 {ECO:0000303|PubMed:24824484}; AltName: Full=Protein LITTLE NUCLEI 1 {ECO:0000303|PubMed:17873096};	SubName: Full=Uncharacterized protein {ECO:0000313|EMBL:CDP02399.1};	--	GO:0000789,cytoplasmic chromatin; GO:0005829,cytosol; GO:0005635,nuclear envelope; GO:0005652,nuclear lamina; GO:0031965,nuclear membrane; GO:0034399,nuclear periphery; GO:0005654,nucleoplasm; GO:0005634,nucleus; GO:0006997,nucleus organization; GO:0097298,regulation of nucleus size	--
g11920	32.65	56.17	44.62	65.3	29.79	57.38	87.87	81.12	52.12	39.99	39.1	75.25	166.27	150.37	158.32	458	1107	997	1014	567	877	1295	1135	719	646	612	1168	2718	2540	2629	LG3	18590021	18590992	-	--	--	hypothetical protein A4A49_23552 [Nicotiana attenuata]	--	SubName: Full=Uncharacterized protein {ECO:0000313|EnsemblPlants:Solyc05g013560.2.1};	--	--	--
g11921	0	0.61	0	0.46	0.65	0.04	1.2	0.34	1.37	1.15	0.77	1.05	0	0.23	0.115	0	40	0	24	41	2	59	16	63	62	40	54	0	13	7	LG3	18596397	18599986	+	K03452 magnesium/proton exchanger | (RefSeq) pentatricopeptide repeat-containing protein At3g62890-like (A)	--	PREDICTED: pentatricopeptide repeat-containing protein At3g63370, chloroplastic [Ipomoea nil]	RecName: Full=Pentatricopeptide repeat-containing protein At3g63370, chloroplastic {ECO:0000305}; AltName: Full=Protein ORGANELLE TRANSCRIPT PROCESSING 86 {ECO:0000303|PubMed:19934379}; Flags: Precursor;	SubName: Full=pentatricopeptide repeat-containing protein At3g63370, chloroplastic-like {ECO:0000313|RefSeq:XP_016468871.1};	FOG: PPR repeat	GO:0009507,chloroplast; GO:0004519,endonuclease activity; GO:0003723,RNA binding; GO:0008270,zinc ion binding; GO:0031425,chloroplast RNA processing; GO:0006397,mRNA processing; GO:0009451,RNA modification	PF13041.6:PPR repeat family
g11927	0.18	1.31	0.12	2.44	0.95	1.07	0	0	0	0.53	3.68	2.55	0.84	1.48	1.16	3	30	3	44	21	19	0	0	0	10	67	46	16	29	23	LG3	18637253	18646312	-	K03327 multidrug resistance protein, MATE family | (RefSeq) protein DETOXIFICATION 29 (A)	--	PREDICTED: protein DETOXIFICATION 29 isoform X2 [Ipomoea nil]	RecName: Full=Protein DETOXIFICATION 29 {ECO:0000303|PubMed:11739388}; Short=AtDTX29 {ECO:0000303|PubMed:11739388}; AltName: Full=Multidrug and toxic compound extrusion protein 29 {ECO:0000305}; Short=MATE protein 29 {ECO:0000305};	RecName: Full=Protein DETOXIFICATION {ECO:0000256|RuleBase:RU004914}; AltName: Full=Multidrug and toxic compound extrusion protein {ECO:0000256|RuleBase:RU004914};	Uncharacterized membrane protein, predicted efflux pump	GO:0016021,integral component of membrane; GO:0005774,vacuolar membrane; GO:0005773,vacuole; GO:0015297,antiporter activity; GO:0015238,drug transmembrane transporter activity; GO:0006855,drug transmembrane transport	PF01554.18:MatE
g1193	0	0	0	0	0	0	0	3.52	9.59	0	2.65	2.4	3.07	0.26	1.665	0	0	0	0	0	0	0	57	153	0	48	43	58	5	32	LG1	7124511	7128955	+	--	--	--	--	--	--	--	--
g11930	9.74	5.07	8.22	4.53	3.94	6.3	14.12	11.39	13.92	13.59	14.65	11.9	8.07	10.23	9.15	264	193	355	136	145	186	402	308	371	424	443	357	255	334	295	LG3	18663835	18675192	-	K03327 multidrug resistance protein, MATE family | (RefSeq) protein DETOXIFICATION 29-like (A)	--	PREDICTED: protein DETOXIFICATION 29 isoform X3 [Ipomoea nil]	RecName: Full=Protein DETOXIFICATION 29 {ECO:0000303|PubMed:11739388}; Short=AtDTX29 {ECO:0000303|PubMed:11739388}; AltName: Full=Multidrug and toxic compound extrusion protein 29 {ECO:0000305}; Short=MATE protein 29 {ECO:0000305};	RecName: Full=Protein DETOXIFICATION {ECO:0000256|RuleBase:RU004914}; AltName: Full=Multidrug and toxic compound extrusion protein {ECO:0000256|RuleBase:RU004914};	Uncharacterized membrane protein, predicted efflux pump	GO:0016021,integral component of membrane; GO:0005774,vacuolar membrane; GO:0005773,vacuole; GO:0015297,antiporter activity; GO:0015238,drug transmembrane transporter activity; GO:0006855,drug transmembrane transport	PF01554.18:MatE
g11931	0.57	0	0	0.68	0.71	0.57	0	0	0	0	0.63	0	0.49	1.13	0.81	13	0	0	17	22	14	0	0	0	0	16	0	13	31	22	LG3	18676906	18682702	-	K03327 multidrug resistance protein, MATE family | (RefSeq) protein DETOXIFICATION 29 (A)	--	PREDICTED: protein DETOXIFICATION 29 isoform X1 [Ipomoea nil]	RecName: Full=Protein DETOXIFICATION 32 {ECO:0000303|PubMed:11739388}; Short=AtDTX32 {ECO:0000303|PubMed:11739388}; AltName: Full=Multidrug and toxic compound extrusion protein 32 {ECO:0000305}; Short=MATE protein 32 {ECO:0000305};	RecName: Full=Protein DETOXIFICATION {ECO:0000256|RuleBase:RU004914}; AltName: Full=Multidrug and toxic compound extrusion protein {ECO:0000256|RuleBase:RU004914};	Uncharacterized membrane protein, predicted efflux pump	GO:0016021,integral component of membrane; GO:0005774,vacuolar membrane; GO:0015297,antiporter activity; GO:0015238,drug transmembrane transporter activity; GO:0006855,drug transmembrane transport	PF01554.18:MatE
g11933	0	0	0	1.14	0.75	0	0	0	0	0.94	2.31	0	1.18	1.24	1.21	0	0	0	21	17	0	0	0	0	18	43	0	23	25	24	LG3	18693267	18695923	+	--	--	PREDICTED: F-box/FBD/LRR-repeat protein At3g26920-like isoform X1 [Ipomoea nil]	RecName: Full=Putative F-box/FBD/LRR-repeat protein At2g05300;	SubName: Full=Uncharacterized protein {ECO:0000313|EMBL:KDO48257.1};	--	--	PF00646.33:F-box domain
g11934	0.59	2.33	2.15	1.9	3.39	1.48	0	0	0	0	0	0	0	0	0	20	112	117	72	157	55	0	0	0	0	0	0	0	0	0	LG3	18702497	18707251	+	--	--	PREDICTED: putative F-box/LRR-repeat protein At4g15060 [Ipomoea nil]	RecName: Full=Putative F-box/FBD/LRR-repeat protein At5g22670;	SubName: Full=Uncharacterized protein {ECO:0000313|EMBL:CDO98453.1};	--	--	PF00646.33:F-box domain
g11938	16.32	14.29	14.8	13.51	16.96	8.33	9.96	14.35	14.19	13.97	16.08	12.98	27.42	25.7	26.56	635	781	917	582	895	353	407	557	543	626	698	559	1243	1204	1224	LG3	18734615	18737419	-	--	--	PREDICTED: uncharacterized protein LOC109160300 [Ipomoea nil]	--	SubName: Full=uncharacterized protein LOC104225205 {ECO:0000313|RefSeq:XP_009775275.1};	--	--	PF00514.23:Armadillo/beta-catenin-like repeat
g1194	3.94	7.46	3.61	6.04	17.27	6.85	7.52	4.05	8.99	7.34	5.64	8.2	4.85	4.63	4.74	236	627	344	400	1402	447	473	242	529	506	377	543	338	334	336	LG1	7129577	7138436	-	K04498 E1A/CREB-binding protein [EC:2.3.1.48] | (RefSeq) probable histone acetyltransferase HAC-like 1 (A)	--	PREDICTED: probable histone acetyltransferase HAC-like 1 isoform X2 [Ipomoea nil]	RecName: Full=Probable histone acetyltransferase HAC-like 1; EC=2.3.1.48 {ECO:0000250|UniProtKB:Q9C5X9};	SubName: Full=Uncharacterized protein {ECO:0000313|EnsemblPlants:Solyc02g089790.2.1};	CREB binding protein/P300 and related TAZ Zn-finger proteins	GO:0005634,nucleus; GO:0004402,histone acetyltransferase activity; GO:0003712,transcription coregulator activity; GO:0008270,zinc ion binding; GO:0006355,regulation of transcription, DNA-templated; GO:0006351,transcription, DNA-templated	PF08214.11:Histone acetylation protein
g11945	7.41	4.83	10	10.57	11.45	11.8	3.43	4.96	4.8	6.2	12.1	19.38	4.87	9.97	7.42	193	177	415	305	405	335	94	129	123	186	352	559	148	313	231	LG3	18773902	18780289	-	--	--	PREDICTED: uncharacterized protein LOC109160161 [Ipomoea nil]	--	SubName: Full=uncharacterized protein LOC104224702 isoform X1 {ECO:0000313|RefSeq:XP_009774688.1};	--	GO:0016021,integral component of membrane	PF12697.7:Alpha/beta hydrolase family
g11949	194.97	129.15	161.27	336.72	224.2	336.17	108.49	117.24	119.48	166.6	184.83	173.9	435.72	509.89	472.805	2774	2582	3655	5304	4328	5212	1622	1664	1672	2730	2935	2738	7225	8737	7981	LG3	18813064	18814049	+	--	--	PREDICTED: uncharacterized protein LOC109159894 [Ipomoea nil]	--	SubName: Full=DNA ligase 1-like {ECO:0000313|RefSeq:XP_009765758.1};	--	GO:0016874,ligase activity	PF07816.11:Protein of unknown function (DUF1645)
g1195	6.88	8.5	5.86	11.8	16.3	12.85	16	9.99	14.14	21.42	13.36	13.17	11.41	11.27	11.34	227	394	308	431	730	462	555	329	459	814	492	481	439	448	444	LG1	7139563	7144546	-	K13128 zinc finger CCHC domain-containing protein 8 | (RefSeq) zinc finger CCHC domain-containing protein 8-like (A)	--	PREDICTED: zinc finger CCHC domain-containing protein 8-like [Ipomoea nil]	--	SubName: Full=uncharacterized protein LOC107772086 {ECO:0000313|RefSeq:XP_016447059.1};	Uncharacterized conserved protein, contains PSP domain	GO:0003676,nucleic acid binding; GO:0008270,zinc ion binding	PF04046.16:PSP
g11950	28.89	37.7	24.81	30.24	18.66	26.63	52.24	28.75	47.99	46.53	66.03	56.17	49.39	62.84	56.115	421	772	576	488	369	423	800	418	688	781	1074	906	839	1103	971	LG3	18818142	18821769	-	K11866 STAM-binding protein [EC:3.4.19.12] | (RefSeq) AMSH-like ubiquitin thioesterase 2 (A)	ko04144: Endocytosis	PREDICTED: AMSH-like ubiquitin thioesterase 2 isoform X1 [Ipomoea nil]	RecName: Full=AMSH-like ubiquitin thioesterase 2; EC=3.4.19.-; AltName: Full=Deubiquitinating enzyme AMSH2;	SubName: Full=AMSH-like ubiquitin thioesterase 2 isoform X3 {ECO:0000313|RefSeq:XP_009789210.1};	SMAD6 interacting protein AMSH, contains JAB/MPN/Mov34 domain	GO:0046872,metal ion binding; GO:0008237,metallopeptidase activity; GO:0071108,protein K48-linked deubiquitination; GO:0070536,protein K63-linked deubiquitination	--
g11956	3.43	5.51	2.25	5.58	3.75	3.77	3.32	3.56	1.56	2.75	3.02	3.42	1.29	2.65	1.97	116	262	121	209	172	139	118	120	52	107	114	128	51	108	80	LG3	18850914	18854037	+	K09591 steroid 5-alpha-reductase [EC:1.3.1.22] | (RefSeq) PnDET2; steroid 5-alpha-reductase DET2 (A)	ko00905: Brassinosteroid biosynthesis	PREDICTED: steroid 5-alpha-reductase DET2 isoform X1 [Ipomoea nil]	RecName: Full=Steroid 5-alpha-reductase DET2; Short=GhDET2; EC=1.3.1.22;	SubName: Full=Steroid 5alpha-reductase {ECO:0000313|EMBL:BAC87862.1};	Steroid reductase	GO:0005737,cytoplasm; GO:0016021,integral component of membrane; GO:0003865,3-oxo-5-alpha-steroid 4-dehydrogenase activity; GO:0047751,cholestenone 5-alpha-reductase activity; GO:0050213,progesterone 5-alpha-reductase activity; GO:0016132,brassinosteroid biosynthetic process; GO:0055114,oxidation-reduction process; GO:0090378,seed trichome elongation; GO:0090377,seed trichome initiation	PF02544.16:3-oxo-5-alpha-steroid 4-dehydrogenase
g11959	1.33	1.75	2.7	0.76	1.19	0.81	0	0	0.04	2.2	0.4	1.02	0.17	1.17	0.67	33	61	107	21	40	22	0	0	1	63	11	28	5	35	20	LG3	18861824	18864252	+	K09591 steroid 5-alpha-reductase [EC:1.3.1.22] | (RefSeq) PnDET2; steroid 5-alpha-reductase DET2 (A)	ko00905: Brassinosteroid biosynthesis	PREDICTED: steroid 5-alpha-reductase DET2 isoform X1 [Ipomoea nil]	RecName: Full=Steroid 5-alpha-reductase DET2; Short=LeDET2; EC=1.3.1.22;	SubName: Full=Steroid 5alpha-reductase {ECO:0000313|EMBL:BAC87862.1};	Steroid reductase	GO:0005737,cytoplasm; GO:0016021,integral component of membrane; GO:0003865,3-oxo-5-alpha-steroid 4-dehydrogenase activity; GO:0047751,cholestenone 5-alpha-reductase activity; GO:0050213,progesterone 5-alpha-reductase activity; GO:0009917,sterol 5-alpha reductase activity; GO:0016132,brassinosteroid biosynthetic process; GO:0010268,brassinosteroid homeostasis; GO:0055114,oxidation-reduction proce…	PF02544.16:3-oxo-5-alpha-steroid 4-dehydrogenase
g1196	2.96	2.49	4.57	10.04	16.08	11.78	9.12	10.76	9.52	10.95	13.06	7.67	11.45	11.56	11.505	145	171	356	544	1067	628	469	525	458	617	713	415	653	681	667	LG1	7146251	7154126	-	K15889 prenylcysteine alpha-carboxyl methylesterase [EC:3.1.1.-] | (RefSeq) probable isoprenylcysteine alpha-carbonyl methylesterase ICMEL2 (A)	ko00900: Terpenoid backbone biosynthesis	PREDICTED: protein GAMETE EXPRESSED 3 [Ipomoea nil]	RecName: Full=Probable isoprenylcysteine alpha-carbonyl methylesterase ICMEL2; EC=3.1.1.n2; AltName: Full=Isoprenylcysteine methylesterase-like protein 2;	SubName: Full=protein GAMETE EXPRESSED 3-like isoform X1 {ECO:0000313|RefSeq:XP_016454457.1};	Carboxylesterase and related proteins	GO:0005789,endoplasmic reticulum membrane; GO:0000139,Golgi membrane; GO:0016021,integral component of membrane; GO:0010296,prenylcysteine methylesterase activity; GO:0008236,serine-type peptidase activity; GO:0009056,catabolic process; GO:0009737,response to abscisic acid	PF13360.6:PQQ-like domain
g11962	0.03	0.8	0.12	0.64	0.6	0.73	0.36	0.68	0	1.8	0.44	1.16	0	0.11	0.055	1	41	7	26	30	29	14	25	0	76	18	47	0	5	3	LG3	18880408	18883579	-	K13457 disease resistance protein RPM1 | (RefSeq) disease resistance protein RPM1-like (A)	ko04626: Plant-pathogen interaction	PREDICTED: putative late blight resistance protein homolog R1A-10 [Ipomoea nil]	RecName: Full=Putative late blight resistance protein homolog R1B-12;	SubName: Full=putative late blight resistance protein homolog R1B-8 isoform X2 {ECO:0000313|RefSeq:XP_016537437.1};	Apoptotic ATPase	GO:0005737,cytoplasm; GO:0016020,membrane; GO:0043531,ADP binding; GO:0005524,ATP binding; GO:0009626,plant-type hypersensitive response	PF00931.22:NB-ARC domain
g11972	0.43	0.6	1.48	0.45	0.57	0.31	0.51	0.61	0.02	1.1	1.63	1.28	0	0	0	22	43	119	25	39	17	27	31	1	64	92	72	0	0	0	LG3	18922038	18926058	-	K13457 disease resistance protein RPM1 | (RefSeq) disease resistance protein RPM1-like (A)	ko04626: Plant-pathogen interaction	PREDICTED: putative late blight resistance protein homolog R1B-16 [Ipomoea nil]	RecName: Full=Putative late blight resistance protein homolog R1B-17;	SubName: Full=putative late blight resistance protein homolog R1B-8 isoform X2 {ECO:0000313|RefSeq:XP_016537437.1};	Apoptotic ATPase	GO:0005737,cytoplasm; GO:0016020,membrane; GO:0043531,ADP binding; GO:0005524,ATP binding; GO:0046872,metal ion binding; GO:0030001,metal ion transport; GO:0009626,plant-type hypersensitive response	PF00931.22:NB-ARC domain
g11973	1.4	1.26	1.07	5.17	7.27	4.85	6.1	2.65	5.03	3.05	2.68	3.85	2.99	2.22	2.605	45	57	55	184	317	170	206	85	159	113	96	137	112	86	99	LG3	18930177	18932808	-	K12816 pre-mRNA-processing factor 17 | (RefSeq) pre-mRNA-processing factor 17-like (A)	ko03040: Spliceosome	PREDICTED: pre-mRNA-processing factor 17-like isoform X2 [Ipomoea nil]	RecName: Full=Protein Mut11; AltName: Full=Mut11p;	SubName: Full=Uncharacterized protein {ECO:0000313|EMBL:KJB10355.1};	mRNA splicing factor	GO:0005634,nucleus	PF00400.32:WD domain, G-beta repeat
g11974	0.45	0.53	0	0.09	0.55	0.5	0.06	0	0	0.45	0	1.16	0.55	0.61	0.58	14	23	0	3	23	17	2	0	0	16	0	40	20	23	22	LG3	18934385	18937378	-	--	--	PREDICTED: polygalacturonase-1 non-catalytic subunit beta-like [Ipomoea nil]	RecName: Full=Polygalacturonase-1 non-catalytic subunit beta; AltName: Full=AroGP1; AltName: Full=Polygalacturonase converter; Short=PG converter; Flags: Precursor;	SubName: Full=polygalacturonase-1 non-catalytic subunit beta-like {ECO:0000313|RefSeq:XP_009794726.1};	--	GO:0048046,apoplast; GO:0005618,cell wall; GO:0071555,cell wall organization; GO:0009835,fruit ripening	PF03181.15:BURP domain
g1198	7.34	10.12	9.51	4.51	12.94	4.86	12.53	12.55	13.99	2.81	3.99	3.93	10.1	8.4	9.25	284	550	586	193	679	205	509	484	532	125	172	168	455	391	423	LG1	7165097	7167776	-	K01180 endo-1,3(4)-beta-glucanase [EC:3.2.1.6] | (RefSeq) probable endo-1,3(4)-beta-glucanase ARB_01444 (A)	--	PREDICTED: probable endo-1,3(4)-beta-glucanase ARB_01444 [Ipomoea nil]	--	SubName: Full=putative endo-1,3(4)-beta-glucanase 2 {ECO:0000313|RefSeq:XP_009767364.1};	Predicted endo-1,3-beta-glucanase	GO:0052861,glucan endo-1,3-beta-glucanase activity, C-3 substituted reducing group	PF17652.1:Glycosyl hydrolase family 81 C-terminal domain
g11988	29.21	25.55	14.79	9.17	4.98	7.83	17.28	14.11	14	29.9	26.26	26.72	21.24	26.86	24.05	558	686	450	194	129	163	347	269	263	658	560	565	473	618	546	LG3	19008173	19010982	+	K00275 pyridoxamine 5'-phosphate oxidase [EC:1.4.3.5] K17759 NAD(P)H-hydrate epimerase [EC:5.1.99.6] | (RefSeq) pyridoxine/pyridoxamine 5'-phosphate oxidase 1, chloroplastic-like (A)	ko00750: Vitamin B6 metabolism	pyridoxine/pyridoxamine 5'-phosphate oxidase 1, chloroplastic isoform X2 [Sesamum indicum]	RecName: Full=Pyridoxine/pyridoxamine 5'-phosphate oxidase 1, chloroplastic; Short=AtPPOX1; Includes: RecName: Full=Pyridoxine/pyridoxamine 5'-phosphate oxidase; EC=1.4.3.5 {ECO:0000269|PubMed:17224143, ECO:0000269|PubMed:17873088}; AltName: Full=PNP/PMP oxidase; Short=PNPOx; AltName: Full=Pyridoxal 5'-phosphate synthase; Includes: RecName: Full=Probable NAD(P)HX epimerase; EC=5.1.99.6 {ECO:00003…	RecName: Full=NAD(P)H-hydrate epimerase {ECO:0000256|HAMAP-Rule:MF_03159}; EC=5.1.99.6 {ECO:0000256|HAMAP-Rule:MF_03159}; AltName: Full=NAD(P)HX epimerase {ECO:0000256|HAMAP-Rule:MF_03159};	Pyridoxamine-phosphate oxidase	GO:0009507,chloroplast; GO:0005829,cytosol; GO:0005739,mitochondrion; GO:0010181,FMN binding; GO:0046872,metal ion binding; GO:0052856,NADHX epimerase activity; GO:0052857,NADPHX epimerase activity; GO:0004733,pyridoxamine-phosphate oxidase activity; GO:0006734,NADH metabolic process; GO:0006739,NADP metabolic process; GO:0008615,pyridoxine biosynthetic process	PF01243.20:Pyridoxamine 5'-phosphate oxidase
g11989	0.89	1.62	1.37	0	0.28	0.09	0	0.96	0.62	0	0.73	0.55	0	0.25	0.125	26	67	64	0	11	3	0	28	18	0	24	18	0	9	5	LG3	19012203	19015658	+	K13457 disease resistance protein RPM1 | (RefSeq) disease resistance protein RPM1-like (A)	ko04626: Plant-pathogen interaction	PREDICTED: putative late blight resistance protein homolog R1B-23 [Ipomoea nil]	RecName: Full=Putative late blight resistance protein homolog R1B-12;	SubName: Full=Uncharacterized protein {ECO:0000313|EnsemblPlants:PGSC0003DMT400005052};	Apoptotic ATPase	GO:0005737,cytoplasm; GO:0016020,membrane; GO:0043531,ADP binding; GO:0005524,ATP binding; GO:0009626,plant-type hypersensitive response	PF00931.22:NB-ARC domain
g1199	9.77	8.59	11.38	7.86	17.06	6.78	7.64	4.72	6.04	5.14	3.74	3.22	10.34	11.11	10.725	365	451	677	325	865	276	300	176	222	221	156	133	450	500	475	LG1	7169137	7174346	-	K01180 endo-1,3(4)-beta-glucanase [EC:3.2.1.6] | (RefSeq) probable endo-1,3(4)-beta-glucanase ARB_01444 (A)	--	PREDICTED: probable endo-1,3(4)-beta-glucanase ARB_01444 [Ipomoea nil]	--	SubName: Full=Uncharacterized protein {ECO:0000313|EMBL:PHT91698.1};	Predicted endo-1,3-beta-glucanase	GO:0052861,glucan endo-1,3-beta-glucanase activity, C-3 substituted reducing group	PF17652.1:Glycosyl hydrolase family 81 C-terminal domain
g11990	2.04	0	3.14	2.95	1.28	0.38	0.29	0	0	0	0.64	2.12	4.12	6.28	5.2	20	0	49	32	17	4	3	0	0	0	7	23	47	74	61	LG3	19016107	19020338	-	--	--	PREDICTED: protein FAR1-RELATED SEQUENCE 5-like [Ipomoea nil]	--	--	--	--	--
g11995	0	1.26	0	0.19	0.78	0.34	0	0	0	0.39	0.58	0.56	1.08	1.36	1.22	0	52	0	6	31	11	0	0	0	13	19	18	37	48	43	LG3	19038023	19046322	+	--	--	PREDICTED: uncharacterized protein LOC109159974 [Ipomoea nil]	RecName: Full=UPF0481 protein At3g47200;	SubName: Full=UPF0481 protein At3g47200-like {ECO:0000313|RefSeq:XP_016435317.1};	--	GO:0016021,integral component of membrane; GO:0005886,plasma membrane	PF03140.15:Plant protein of unknown function
g12	2.73	0.88	0.03	0	0.25	0	0	0	1.52	0	0	0	0.37	0.71	0.54	64	29	1	0	8	0	0	0	35	0	0	0	10	20	15	LG1	64788	66721	-	K20623 typhasterol/6-deoxotyphasterol 2alpha-hydroxylase | (RefSeq) cytochrome P450 71A1-like (A)	ko00905: Brassinosteroid biosynthesis	PREDICTED: geraniol 8-hydroxylase-like [Ipomoea nil]	RecName: Full=Geraniol 8-hydroxylase; EC=1.14.13.152; AltName: Full=Cytochrome P450 76B6; AltName: Full=Geraniol 10-hydroxylase; Short=CrG10H;	SubName: Full=Geraniol 10-hydroxylase-like protein {ECO:0000313|EMBL:AGX93051.1};	Cytochrome P450 CYP2 subfamily	GO:0005789,endoplasmic reticulum membrane; GO:0016021,integral component of membrane; GO:0102811,geraniol 10-hydroxylase activity; GO:0020037,heme binding; GO:0005506,iron ion binding; GO:0016709,oxidoreductase activity, acting on paired donors, with incorporation or reduction of molecular oxygen, NAD(P)H as one donor, and incorporation of one atom of oxygen; GO:0016099,monoterpenoid biosynthetic…	PF00067.22:Cytochrome P450
g1200	43.24	48.41	25.22	50.15	39.23	50.95	50.6	68.24	86.74	69.72	60.69	85.87	127.88	104.71	116.295	775	1219	720	995	954	995	953	1220	1529	1439	1214	1703	2671	2260	2466	LG1	7177091	7179603	+	--	--	PREDICTED: sarcolemmal membrane-associated protein [Ipomoea nil]	--	SubName: Full=armadillo repeat-containing kinesin-like protein 1 {ECO:0000313|RefSeq:XP_009774614.1};	--	GO:0016021,integral component of membrane	--
g12000	0.55	2.44	0.89	0.68	0.29	0.25	0	0	0	1.3	1.56	4.63	0.88	3.04	1.96	20	124	51	27	14	10	0	0	0	54	63	185	37	132	85	LG3	19091840	19095047	+	K13457 disease resistance protein RPM1 | (RefSeq) disease resistance protein RPM1-like (A)	ko04626: Plant-pathogen interaction	PREDICTED: putative late blight resistance protein homolog R1B-16 [Ipomoea nil]	RecName: Full=Putative late blight resistance protein homolog R1B-12;	SubName: Full=Putative late blight resistance protein-like r1b-12 {ECO:0000313|EMBL:OIT04602.1};	Apoptotic ATPase	GO:0005737,cytoplasm; GO:0016020,membrane; GO:0043531,ADP binding; GO:0005524,ATP binding; GO:0009626,plant-type hypersensitive response	PF00931.22:NB-ARC domain
g12004	0	0.43	0	0.21	3.92	0.34	0.95	1.03	0.61	0	0.03	0	0.71	0.61	0.66	0	18	0	7	160	11	30	31	18	0	1	0	25	22	24	LG3	19118410	19125329	+	--	--	PREDICTED: uncharacterized protein LOC109172495 [Ipomoea nil]	--	SubName: Full=uncharacterized protein LOC108987197 {ECO:0000313|RefSeq:XP_018815621.1};	FOG: Reverse transcriptase	--	PF13966.6:zinc-binding in reverse transcriptase
g12005	1.71	2.29	0	1.69	7.43	1.91	6.82	4.16	4.02	0.26	2.37	2.51	0.4	1.25	0.825	51	96	0	56	301	62	214	124	118	9	79	83	14	45	30	LG3	19126719	19136085	-	K16287 ubiquitin-like-specific protease 1C/D [EC:3.4.22.68] | (RefSeq) ubiquitin-like-specific protease 1D (A)	--	PREDICTED: ubiquitin-like-specific protease 1D isoform X1 [Ipomoea nil]	RecName: Full=Ubiquitin-like-specific protease 1D; EC=3.4.22.-; AltName: Full=Protein OVERLY TOLERANT TO SALT 1;	SubName: Full=ubiquitin-like-specific protease 1D isoform X1 {ECO:0000313|RefSeq:XP_016441706.1};	Protease, Ulp1 family	GO:0016607,nuclear speck; GO:0005634,nucleus; GO:0004175,endopeptidase activity; GO:0070140,SUMO-specific isopeptidase activity; GO:0016929,SUMO-specific protease activity; GO:0016926,protein desumoylation; GO:0009651,response to salt stress; GO:0010228,vegetative to reproductive phase transition of meristem	PF02902.19:Ulp1 protease family, C-terminal catalytic domain
g12006	4.46	3.06	2.69	5.56	18.76	5.23	6.52	5.73	7.45	6.76	8.1	5.74	8.66	5.66	7.16	433	417	416	597	2470	553	665	555	711	755	877	616	979	661	820	LG3	19140473	19151625	-	K11446 histone demethylase JARID1 [EC:1.14.11.-] | (RefSeq) lysine-specific demethylase lid (A)	--	PREDICTED: methyl-CpG-binding domain-containing protein 9-like [Ipomoea nil]	RecName: Full=Methyl-CpG-binding domain-containing protein 9; Short=AtMBD9; Short=MBD09; EC=2.3.1.48; AltName: Full=Histone acetyl transferase MBD9; AltName: Full=Methyl-CpG-binding protein MBD9;	SubName: Full=Methyl-cpg-binding domain-containing protein 9 {ECO:0000313|EMBL:OIS95826.1};	--	GO:0005720,nuclear heterochromatin; GO:0005634,nucleus; GO:0009506,plasmodesma; GO:0004402,histone acetyltransferase activity; GO:0042393,histone binding; GO:0046872,metal ion binding; GO:0008327,methyl-CpG binding; GO:0061630,ubiquitin protein ligase activity; GO:0016573,histone acetylation; GO:0043966,histone H3 acetylation; GO:0043967,histone H4 acetylation; GO:0010216,maintenance of DNA methy…	PF00628.29:PHD-finger
g12009	9.3	8.55	7.69	8.71	12.41	10.25	3.93	8.83	1.05	4.74	4.5	4.49	13.13	4.99	9.06	189	244	249	196	342	227	84	179	21	111	102	101	311	122	217	LG3	19164898	19166305	-	K15014 solute carrier family 29 (equilibrative nucleoside transporter), member 1/2/3 | (RefSeq) equilibrative nucleotide transporter 1-like (A)	--	PREDICTED: equilibrative nucleotide transporter 1-like isoform X1 [Ipomoea nil]	RecName: Full=Equilibrative nucleotide transporter 1; Short=AtENT1; AltName: Full=Nucleoside transporter ENT1;	SubName: Full=Putative equilibrative nucleotide transporter 1 {ECO:0000313|EMBL:OTG17144.1};	Nucleoside transporter	GO:0016021,integral component of membrane; GO:0005774,vacuolar membrane; GO:0005337,nucleoside transmembrane transporter activity	PF01733.18:Nucleoside transporter
g1201	5.5	4.54	1.32	3.2	2.57	1.75	3.5	2.29	4.21	4.33	4.55	0	7.07	8.16	7.615	118	137	45	76	75	41	79	49	89	107	109	0	177	211	194	LG1	7179660	7183656	-	K23877 xyloglucan O-acetyltransferase | (RefSeq) protein ALTERED XYLOGLUCAN 4-like (A)	--	PREDICTED: protein trichome birefringence-like 19 [Ipomoea nil]	RecName: Full=Protein trichome birefringence-like 19;	SubName: Full=Protein trichome birefringence-like 19 {ECO:0000313|EMBL:OIT05732.1};	--	GO:0005794,Golgi apparatus; GO:0016021,integral component of membrane; GO:0016413,O-acetyltransferase activity; GO:0071554,cell wall organization or biogenesis	PF13839.6:GDSL/SGNH-like Acyl-Esterase family found in Pmr5 and Cas1p
g12010	74.87	66.55	74.42	66.53	39.19	57.91	54.24	46.84	45.08	48.14	53.76	51.88	35.5	38.21	36.855	1788	2233	2831	1759	1270	1507	1361	1116	1059	1324	1433	1371	988	1099	1044	LG3	19169800	19173587	+	K02981 small subunit ribosomal protein S2e | (RefSeq) 40S ribosomal protein S2-3-like (A)	ko03010: Ribosome	PREDICTED: 40S ribosomal protein S2-3-like [Ipomoea nil]	RecName: Full=40S ribosomal protein S2-4;	SubName: Full=40S ribosomal protein S2-4 {ECO:0000313|EMBL:KEH40624.1};	40S ribosomal protein S2/30S ribosomal protein S5	GO:0022627,cytosolic small ribosomal subunit; GO:0016020,membrane; GO:0009506,plasmodesma; GO:0003723,RNA binding; GO:0003735,structural constituent of ribosome; GO:0006412,translation	PF00333.20:Ribosomal protein S5, N-terminal domain
g12011	3.11	2.73	6.49	0	0.03	0	0	0	0	0	0	0	1.08	3.22	2.15	69	85	229	0	1	0	0	0	0	0	0	0	28	86	57	LG3	19176350	19179035	+	K13415 protein brassinosteroid insensitive 1 [EC:2.7.10.1 2.7.11.1] | (RefSeq) systemin receptor SR160-like (A)	ko04075: Plant hormone signal transduction	PREDICTED: probable receptor-like protein kinase At5g18500 [Ipomoea nil]	RecName: Full=Nodulation receptor kinase; EC=2.7.11.1 {ECO:0000269|PubMed:26839127}; AltName: Full=Does not make infections protein 2; AltName: Full=MtSYMRK; AltName: Full=Symbiosis receptor-like kinase; Flags: Precursor;	SubName: Full=probable serine/threonine-protein kinase At1g01540 isoform X3 {ECO:0000313|RefSeq:XP_016548769.1};	Serine/threonine protein kinase	GO:0016021,integral component of membrane; GO:0005524,ATP binding; GO:0004672,protein kinase activity; GO:0004674,protein serine/threonine kinase activity; GO:0009877,nodulation; GO:0046777,protein autophosphorylation	PF00069.25:Protein kinase domain
g12012	1.97	1.03	0	4.91	8.74	3.61	1.53	0.59	1.3	0.46	0	0	3.29	2.29	2.79	60	44	0	166	362	120	49	18	39	16	0	0	117	84	101	LG3	19179096	19181495	-	K09561 STIP1 homology and U-box containing protein 1 [EC:2.3.2.27] | (RefSeq) E3 ubiquitin-protein ligase CHIP-like (A)	ko04120: Ubiquitin mediated proteolysis; ko04141: Protein processing in endoplasmic reticulum	PREDICTED: U-box domain-containing protein 18-like [Ipomoea nil]	RecName: Full=U-box domain-containing protein 18 {ECO:0000303|PubMed:11495788}; EC=2.3.2.27 {ECO:0000269|PubMed:27956469}; AltName: Full=Plant U-box protein 18 {ECO:0000303|PubMed:11495788}; AltName: Full=RING-type E3 ubiquitin transferase PUB18 {ECO:0000303|PubMed:11495788};	RecName: Full=RING-type E3 ubiquitin transferase {ECO:0000256|SAAS:SAAS00702733}; EC=2.3.2.27 {ECO:0000256|SAAS:SAAS00702733};	FOG: Armadillo/beta-catenin-like repeats	GO:0005737,cytoplasm; GO:0012505,endomembrane system; GO:0016020,membrane; GO:0005634,nucleus; GO:0061630,ubiquitin protein ligase activity; GO:0004842,ubiquitin-protein transferase activity; GO:0009738,abscisic acid-activated signaling pathway; GO:0016567,protein ubiquitination; GO:0009787,regulation of abscisic acid-activated signaling pathway; GO:0010029,regulation of seed germination; GO:0010…	PF04564.15:U-box domain
g12014	9.16	14.13	13.92	5.2	5.59	6.01	10.14	11.43	5.69	3.42	3.57	5.99	5.51	10.39	7.95	221	479	535	139	183	158	257	275	135	95	96	160	155	302	229	LG3	19186476	19188275	-	K13495 cis-zeatin O-glucosyltransferase [EC:2.4.1.215] | (RefSeq) zeatin O-glucosyltransferase-like (A)	ko00908: Zeatin biosynthesis	PREDICTED: zeatin O-glucosyltransferase-like [Ipomoea nil]	RecName: Full=Zeatin O-glucosyltransferase; EC=2.4.1.203; AltName: Full=Trans-zeatin O-beta-D-glucosyltransferase;	RecName: Full=Glycosyltransferase {ECO:0000256|RuleBase:RU362057}; EC=2.4.1.- {ECO:0000256|RuleBase:RU362057};	UDP-glucuronosyl and UDP-glucosyl transferase	GO:0050403,trans-zeatin O-beta-D-glucosyltransferase activity; GO:0050404,zeatin O-beta-D-xylosyltransferase activity; GO:0009690,cytokinin metabolic process; GO:0048439,flower morphogenesis; GO:0009965,leaf morphogenesis; GO:0045926,negative regulation of growth; GO:0006486,protein glycosylation; GO:0010380,regulation of chlorophyll biosynthetic process; GO:0010083,regulation of vegetative meris…	PF00201.18:UDP-glucoronosyl and UDP-glucosyl transferase
g12016	18.43	16.58	15.29	15.65	16.03	12.03	19.79	27.99	27.16	23.76	12.28	12.98	27.79	31.23	29.51	367	464	485	345	433	261	414	556	532	545	273	286	645	749	697	LG3	19195400	19199228	+	--	--	--	--	--	--	--	--
g1202	3.61	9.52	0	2.17	8.45	3.77	10.78	18.88	16.34	2.95	9.45	3.26	11.6	12.75	12.175	51	189	0	34	162	58	160	266	227	48	149	51	191	217	204	LG1	7186261	7188017	+	--	--	--	--	--	--	--	--
g12022	1.93	3.64	3.23	2.94	7.78	4.27	6.1	3.98	6.14	6.72	4.35	4.94	2.17	1.17	1.67	92	243	245	155	502	221	305	189	287	368	231	260	120	67	94	LG3	19222664	19226065	-	K13457 disease resistance protein RPM1 | (RefSeq) disease resistance protein RPM1-like (A)	ko04626: Plant-pathogen interaction	PREDICTED: putative late blight resistance protein homolog R1B-16 [Ipomoea nil]	RecName: Full=Putative late blight resistance protein homolog R1A-6;	SubName: Full=putative late blight resistance protein homolog R1B-16 {ECO:0000313|RefSeq:XP_016468676.1, ECO:0000313|RefSeq:XP_016468677.1, ECO:0000313|RefSeq:XP_016468678.1};	Apoptotic ATPase	GO:0005737,cytoplasm; GO:0016020,membrane; GO:0043531,ADP binding; GO:0005524,ATP binding; GO:0009626,plant-type hypersensitive response	PF00931.22:NB-ARC domain
g12023	127.6	98.84	104.42	34.57	62.86	37.88	43.58	48.26	27.92	9.55	18.28	12.07	171.05	160.92	165.985	1357	1477	1769	407	907	439	487	512	292	117	217	142	2120	2061	2091	LG3	19226820	19227784	+	--	--	--	--	--	--	--	--
g1203	0.52	1.13	0	0.16	0.06	0	0	1.64	0	2.09	1.46	2.8	0	0.04	0.02	12	37	0	4	2	0	0	38	0	56	38	72	0	1	1	LG1	7188876	7191996	-	K23877 xyloglucan O-acetyltransferase | (RefSeq) protein ALTERED XYLOGLUCAN 4-like (A)	--	PREDICTED: protein trichome birefringence-like 19 [Ipomoea nil]	RecName: Full=Protein trichome birefringence-like 21;	SubName: Full=Protein trichome birefringence-like 19 {ECO:0000313|EMBL:OIT05732.1};	--	GO:0005794,Golgi apparatus; GO:0016021,integral component of membrane; GO:0016413,O-acetyltransferase activity; GO:0071554,cell wall organization or biogenesis	PF13839.6:GDSL/SGNH-like Acyl-Esterase family found in Pmr5 and Cas1p
g12030	1.69	1.11	0	4.12	4.78	3.53	8.08	7.94	10.69	10.33	10.96	6.32	6.86	6.37	6.615	66	61	0	178	253	150	331	309	410	464	477	273	312	299	306	LG3	19275372	19279060	-	K13457 disease resistance protein RPM1 | (RefSeq) disease resistance protein RPM1-like (A)	ko04626: Plant-pathogen interaction	PREDICTED: putative late blight resistance protein homolog R1B-23 [Ipomoea nil]	RecName: Full=Putative late blight resistance protein homolog R1A-3;	SubName: Full=NBS-LRR type disease resistance protein {ECO:0000313|EMBL:ABS29403.1}; Flags: Fragment;	Apoptotic ATPase	GO:0005737,cytoplasm; GO:0016020,membrane; GO:0043531,ADP binding; GO:0005524,ATP binding; GO:0009626,plant-type hypersensitive response	PF00931.22:NB-ARC domain
g12032	2.98	3.45	0.97	8.53	8.67	8.29	9.17	7.65	7.54	30.81	25.82	27.04	7.13	5.98	6.555	153	249	79	485	604	464	495	392	381	1822	1480	1537	427	370	399	LG3	19284721	19288460	-	K13457 disease resistance protein RPM1 | (RefSeq) disease resistance protein RPM1-like (A)	ko04626: Plant-pathogen interaction	PREDICTED: putative late blight resistance protein homolog R1B-16 [Ipomoea nil]	RecName: Full=Putative late blight resistance protein homolog R1A-6;	SubName: Full=putative late blight resistance protein homolog R1B-16 {ECO:0000313|RefSeq:XP_016468676.1, ECO:0000313|RefSeq:XP_016468677.1, ECO:0000313|RefSeq:XP_016468678.1};	Apoptotic ATPase	GO:0005737,cytoplasm; GO:0016020,membrane; GO:0043531,ADP binding; GO:0005524,ATP binding; GO:0009626,plant-type hypersensitive response	PF00931.22:NB-ARC domain
g12034	2.58	2.75	0.55	1.43	3.3	2.23	0.65	0.27	1.36	0.91	1.28	1.69	0.31	0.34	0.325	106	159	36	65	184	100	28	11	55	43	59	77	15	17	16	LG3	19293452	19297040	-	K13457 disease resistance protein RPM1 | (RefSeq) disease resistance protein RPM1-like (A)	ko04626: Plant-pathogen interaction	PREDICTED: putative late blight resistance protein homolog R1A-10 [Ipomoea nil]	RecName: Full=Putative late blight resistance protein homolog R1A-6;	SubName: Full=putative late blight resistance protein homolog R1B-8 isoform X2 {ECO:0000313|RefSeq:XP_016537437.1};	Apoptotic ATPase	GO:0005737,cytoplasm; GO:0016020,membrane; GO:0043531,ADP binding; GO:0005524,ATP binding; GO:0009626,plant-type hypersensitive response	PF00931.22:NB-ARC domain
g12036	2.5	2.71	3.54	1.36	2.16	1.14	0.76	1.92	2.64	3.92	1.03	3.4	1.37	1.4	1.385	141	214	317	85	165	70	45	108	146	254	65	212	90	95	93	LG3	19298490	19304130	-	K13457 disease resistance protein RPM1 | (RefSeq) disease resistance protein RPM1-like (A)	ko04626: Plant-pathogen interaction	PREDICTED: putative late blight resistance protein homolog R1B-17 [Ipomoea nil]	RecName: Full=Putative late blight resistance protein homolog R1B-12;	SubName: Full=Uncharacterized protein {ECO:0000313|EnsemblPlants:Solyc11g006640.1.1};	Apoptotic ATPase	GO:0005737,cytoplasm; GO:0016020,membrane; GO:0043531,ADP binding; GO:0005524,ATP binding; GO:0009626,plant-type hypersensitive response	PF00931.22:NB-ARC domain
g12038	10.13	14.19	11.7	34.28	63.28	32.43	41.94	44.18	24.66	52.64	60.86	42.34	32.32	32.3	32.31	404	795	743	1513	3423	1409	1757	1757	967	2417	2708	1868	1502	1551	1527	LG3	19311495	19316082	+	K03549 KUP system potassium uptake protein | (RefSeq) putative potassium transporter 12 (A)	--	PREDICTED: putative potassium transporter 12 isoform X1 [Ipomoea nil]	RecName: Full=Putative potassium transporter 12; Short=AtPOT12;	RecName: Full=Potassium transporter {ECO:0000256|RuleBase:RU321113};	--	GO:0009507,chloroplast; GO:0016021,integral component of membrane; GO:0016020,membrane; GO:0005886,plasma membrane; GO:0015079,potassium ion transmembrane transporter activity	PF02705.16:K+ potassium transporter
g12042	0.1	0	0	0	1.31	0	0	0	0	2.06	2.48	1.43	0	1.31	0.655	1	0	0	0	18	0	0	0	0	24	28	16	0	16	8	LG3	19333135	19334219	+	--	--	--	--	--	--	--	--
g12045	21.91	17.69	18.57	36.2	38.41	26.31	23.72	39.13	20.91	33.84	33.05	29.12	39.55	42.3	40.925	357	405	482	653	849	467	406	636	335	635	601	525	751	830	791	LG3	19340692	19341820	-	--	--	PREDICTED: uncharacterized protein LOC109160757 [Ipomoea nil]	--	SubName: Full=uncharacterized protein LOC107805485 {ECO:0000313|RefSeq:XP_016485026.1};	--	GO:0016021,integral component of membrane	PF06161.11:Protein of unknown function (DUF975)
g12059	0.59	0	0	0	0.02	0	0.77	0	0	2.33	1.15	1.58	0	0	0	19	0	0	0	1	0	26	0	0	86	41	56	0	0	0	LG3	19428877	19436400	+	K16296 serine carboxypeptidase-like clade I [EC:3.4.16.-] | (RefSeq) serine carboxypeptidase-like 7 (A)	--	PREDICTED: serine carboxypeptidase-like 7 [Ipomoea nil]	RecName: Full=Serine carboxypeptidase-like 18; EC=3.4.16.-; Flags: Precursor;	SubName: Full=serine carboxypeptidase-like 18 isoform X1 {ECO:0000313|RefSeq:XP_009795830.1};	Serine carboxypeptidases (lysosomal cathepsin A)	GO:0005576,extracellular region; GO:0004180,carboxypeptidase activity; GO:0016747,transferase activity, transferring acyl groups other than amino-acyl groups; GO:0019748,secondary metabolic process	PF00450.22:Serine carboxypeptidase
g1206	238.5	167.75	172.82	154.7	302.33	182.33	160.88	143.93	193.54	134.63	151.29	133.61	275.66	288.13	281.895	6133	6061	7079	4404	10548	5109	4347	3692	4895	3987	4342	3802	8261	8923	8592	LG1	7202258	7205083	+	K01611 S-adenosylmethionine decarboxylase [EC:4.1.1.50] | (RefSeq) mgsdcg1; S-adenosylmethionine decarboxylase proenzyme (A)	ko00270: Cysteine and methionine metabolism; ko00330: Arginine and proline metabolism	RecName: Full=S-adenosylmethionine decarboxylase proenzyme; Short=AdoMetDC; Short=SAMDC; Contains: RecName: Full=S-adenosylmethionine decarboxylase alpha chain; Contains: RecName: Full=S-adenosylmethionine decarboxylase beta chain; Flags: Precursor AAF71199.1 S-adenosylmethionine decarboxylase [Ipomoea batatas]	RecName: Full=S-adenosylmethionine decarboxylase proenzyme; Short=AdoMetDC; Short=SAMDC; EC=4.1.1.50; Contains: RecName: Full=S-adenosylmethionine decarboxylase alpha chain; Contains: RecName: Full=S-adenosylmethionine decarboxylase beta chain; Flags: Precursor;	RecName: Full=S-adenosylmethionine decarboxylase proenzyme {ECO:0000256|PIRNR:PIRNR001355}; EC=4.1.1.50 {ECO:0000256|PIRNR:PIRNR001355};	S-adenosylmethionine decarboxylase	GO:0004014,adenosylmethionine decarboxylase activity; GO:0006557,S-adenosylmethioninamine biosynthetic process; GO:0008295,spermidine biosynthetic process; GO:0006597,spermine biosynthetic process	PF01536.16:Adenosylmethionine decarboxylase
g12060	0	0.91	0	0	0	0	0	0	0	0	0	0	0.64	1.41	1.025	0	24	0	0	0	0	0	0	0	0	0	0	14	32	23	LG3	19437217	19440288	+	--	--	PREDICTED: uncharacterized protein LOC109160798 [Ipomoea nil]	--	SubName: Full=Ankyrin repeat family protein {ECO:0000313|EMBL:EOX96533.1};	--	GO:0016021,integral component of membrane	PF13962.6:Domain of unknown function
g12063	7.01	9.2	6.44	1.59	1.33	3.78	1.12	2.49	3.86	2.08	2.47	2.94	0.66	2.4	1.53	155	286	227	39	40	91	26	55	84	53	61	72	17	64	41	LG3	19454787	19461172	+	--	--	PREDICTED: WAT1-related protein At3g28050-like isoform X1 [Ipomoea nil]	RecName: Full=WAT1-related protein At5g40240;	RecName: Full=WAT1-related protein {ECO:0000256|RuleBase:RU363077};	--	GO:0016021,integral component of membrane; GO:0005886,plasma membrane; GO:0022857,transmembrane transporter activity	PF00892.20:EamA-like transporter family
g12065	0	0	2.15	0	0	0	1.17	6.1	6.05	0	0	0	2.46	0.68	1.57	0	0	50	0	0	0	18	89	87	0	0	0	42	12	27	LG3	19463529	19464542	-	--	--	--	--	--	--	--	--
g12066	3	0	0	0.54	0.88	1.19	0	0	0	3.38	2.51	1.17	0	0	0	30	0	0	6	12	13	0	0	0	39	28	13	0	0	0	LG3	19467287	19468280	+	K14677 aminoacylase [EC:3.5.1.14] | (RefSeq) aminoacylase-1 (A)	ko00220: Arginine biosynthesis; ko01210: 2-Oxocarboxylic acid metabolism; ko01230: Biosynthesis of amino acids	--	--	--	--	--	--
g12071	8.59	6.41	5.77	12.82	14.33	11.38	4.26	7.77	5.03	5.44	3.15	1.99	3.84	6.44	5.14	144	151	154	238	326	208	75	130	83	105	59	37	75	130	103	LG3	19483777	19487399	+	K15040 voltage-dependent anion channel protein 2 | (RefSeq) mitochondrial outer membrane protein porin 2-like (A)	--	PREDICTED: mitochondrial outer membrane protein porin 2-like [Ipomoea nil]	RecName: Full=Mitochondrial outer membrane protein porin 2; AltName: Full=Voltage-dependent anion-selective channel protein 2; Short=AtVDAC2; Short=VDAC-2;	SubName: Full=Mitochondrial outer membrane protein porin 2 {ECO:0000313|EMBL:PHU19660.1};	Porin/voltage-dependent anion-selective channel protein	GO:0005741,mitochondrial outer membrane; GO:0046930,pore complex; GO:0015288,porin activity; GO:0006811,ion transport; GO:0040008,regulation of growth	PF01459.22:Eukaryotic porin
g12075	3.78	0	0	1.77	2.2	2.4	0	1.08	5.6	0	0.54	2.36	0.76	0.47	0.615	81	0	0	42	64	56	0	23	118	0	13	56	19	12	16	LG3	19535252	19538732	-	K18810 cyclin D1/2/4, plant | (RefSeq) cyclin-D1-1-like (A)	--	PREDICTED: cyclin-D1-1-like [Ipomoea nil]	RecName: Full=Cyclin-D1-1; AltName: Full=Cyclin-delta-1; Short=Cyclin-d1; AltName: Full=G1/S-specific cyclin-D1-1; Short=CycD1;1;	SubName: Full=cyclin-D1-1 isoform X1 {ECO:0000313|RefSeq:XP_016548113.1};	G1/S-specific cyclin D	GO:0005634,nucleus; GO:0007049,cell cycle; GO:0051301,cell division	PF00134.23:Cyclin, N-terminal domain
g12081	12.54	4.22	13.67	2.24	0.2	1.64	0	0	0.28	0	2.59	3.98	0	4.46	2.23	91	43	158	18	2	13	0	0	2	0	21	32	0	39	20	LG3	19589797	19590299	+	--	--	PREDICTED: uncharacterized protein LOC109243614 [Nicotiana attenuata]	--	SubName: Full=uncharacterized protein LOC104233217 {ECO:0000313|RefSeq:XP_009784881.1};	--	--	PF12023.8:Domain of unknown function (DUF3511)
g12087	2.18	2.05	0	0.38	1.3	0.77	3.55	2.68	2.72	4.03	4.6	8.01	0.06	1.64	0.85	31	41	0	6	25	12	53	38	38	66	73	126	1	28	15	LG3	19635252	19651821	+	--	--	uncharacterized protein LOC111408154 isoform X1 [Olea europaea var. sylvestris]	--	SubName: Full=Uncharacterized protein {ECO:0000313|EMBL:KCW69370.1}; Flags: Fragment;	Predicted lipase/calmodulin-binding heat-shock protein	--	--
g12096	1.01	0	0	0	0.14	1.16	0.84	0	0	1.65	2.33	2.01	0	0	0	16	0	0	0	3	20	14	0	0	30	41	35	0	0	0	LG3	19699922	19714357	-	--	--	PREDICTED: uncharacterized protein LOC109176424 [Ipomoea nil]	RecName: Full=Transcription factor bHLH168 {ECO:0000305}; AltName: Full=Basic helix-loop-helix protein 168 {ECO:0000305}; Short=AtbHLH168 {ECO:0000305}; Short=bHLH 168 {ECO:0000305}; AltName: Full=bHLH transcription factor bHLH168 {ECO:0000305};	SubName: Full=Uncharacterized protein {ECO:0000313|EMBL:OAY47758.1};	--	GO:0090575,RNA polymerase II transcription factor complex; GO:0046983,protein dimerization activity; GO:0000977,RNA polymerase II regulatory region sequence-specific DNA binding; GO:0006357,regulation of transcription by RNA polymerase II; GO:0006351,transcription, DNA-templated	PF00010.26:Helix-loop-helix DNA-binding domain
g1210	1.72	3.9	1.36	9.58	8.57	6.41	10.44	9.22	7.15	7.05	5.54	5.23	8.08	7.09	7.585	65	207	82	401	440	264	415	348	266	307	234	219	356	323	340	LG1	7223108	7226866	+	K13418 somatic embryogenesis receptor kinase 1 [EC:2.7.10.1 2.7.11.1] | (RefSeq) somatic embryogenesis receptor kinase 2 (A)	--	PREDICTED: protein NSP-INTERACTING KINASE 1-like isoform X1 [Ipomoea nil]	RecName: Full=Protein NSP-INTERACTING KINASE 1 {ECO:0000303|PubMed:15489295}; Short=AtNIK1 {ECO:0000303|PubMed:15489295}; EC=2.7.11.1 {ECO:0000269|PubMed:15489295}; AltName: Full=LRR receptor-like serine/threonine-protein kinase NIK1 {ECO:0000303|PubMed:15489295}; Flags: Precursor;	SubName: Full=protein NSP-INTERACTING KINASE 1-like {ECO:0000313|RefSeq:XP_016439886.1};	--	GO:0005737,cytoplasm; GO:0016021,integral component of membrane; GO:0005654,nucleoplasm; GO:0005886,plasma membrane; GO:0005524,ATP binding; GO:0004672,protein kinase activity; GO:0004675,transmembrane receptor protein serine/threonine kinase activity; GO:0007166,cell surface receptor signaling pathway; GO:0051607,defense response to virus; GO:0040015,negative regulation of multicellular organism…	PF07714.17:Protein tyrosine kinase
g12105	0	1.75	1.48	1.14	0.98	0.63	0	0	0	6.54	2.35	4.56	1.93	1.67	1.8	0	72	69	37	39	20	0	0	0	221	77	148	66	59	63	LG3	19780554	19783713	+	K13457 disease resistance protein RPM1 | (RefSeq) disease resistance protein RPM1-like (A)	ko04626: Plant-pathogen interaction	PREDICTED: putative late blight resistance protein homolog R1B-16 [Ipomoea nil]	RecName: Full=Putative late blight resistance protein homolog R1B-17;	SubName: Full=NBS-LRR type disease resistance protein {ECO:0000313|EMBL:ABS29403.1}; Flags: Fragment;	Apoptotic ATPase	GO:0005737,cytoplasm; GO:0016020,membrane; GO:0043531,ADP binding; GO:0005524,ATP binding; GO:0046872,metal ion binding; GO:0030001,metal ion transport; GO:0009626,plant-type hypersensitive response	PF00931.22:NB-ARC domain
g12108	3.33	5.64	5.14	2.74	2.46	2.36	13.49	9.94	10.33	5.42	2.65	4.8	7.96	9.32	8.64	79	188	194	72	79	61	336	235	241	148	70	126	220	266	243	LG3	19799257	19802399	-	K09591 steroid 5-alpha-reductase [EC:1.3.1.22] | (RefSeq) PnDET2; steroid 5-alpha-reductase DET2 (A)	ko00905: Brassinosteroid biosynthesis	PREDICTED: steroid 5-alpha-reductase DET2 isoform X2 [Ipomoea nil]	RecName: Full=Steroid 5-alpha-reductase DET2; Short=GhDET2; EC=1.3.1.22;	SubName: Full=Steroid 5alpha-reductase {ECO:0000313|EMBL:BAC87862.1};	Steroid reductase	GO:0005737,cytoplasm; GO:0016021,integral component of membrane; GO:0003865,3-oxo-5-alpha-steroid 4-dehydrogenase activity; GO:0047751,cholestenone 5-alpha-reductase activity; GO:0050213,progesterone 5-alpha-reductase activity; GO:0016132,brassinosteroid biosynthetic process; GO:0055114,oxidation-reduction process; GO:0090378,seed trichome elongation; GO:0090377,seed trichome initiation	PF02544.16:3-oxo-5-alpha-steroid 4-dehydrogenase
g12112	0	1.48	0.07	6.21	7.16	1.3	0	0	0	2.37	1.86	0	0	0	0	0	19	1	63	89	13	0	0	0	25	19	0	0	0	0	LG3	19815774	19816916	+	--	--	--	--	--	--	--	--
g12115	32.23	27.47	31.95	54.47	10.32	41.88	42.94	36.65	39.76	97.37	84.06	93.67	39.45	43.39	41.42	380	455	600	711	165	538	532	431	461	1322	1106	1222	542	616	579	LG3	19836774	19837839	-	K07937 ADP-ribosylation factor 1 | (RefSeq) ADP-ribosylation factor (A)	ko04144: Endocytosis	Small GTPase superfamily [Macleaya cordata]	RecName: Full=ADP-ribosylation factor 2;	SubName: Full=Small GTPase superfamily {ECO:0000313|EMBL:OVA16707.1};	GTP-binding ADP-ribosylation factor Arf1	GO:0005794,Golgi apparatus; GO:0005525,GTP binding; GO:0006886,intracellular protein transport; GO:0006471,protein ADP-ribosylation; GO:0007264,small GTPase mediated signal transduction; GO:0016192,vesicle-mediated transport	--
g12116	2.04	1.12	2.71	1.05	3.65	2.03	6.99	1.37	3.07	0.61	0.06	0.03	2.89	1.63	2.26	58	45	123	33	141	63	209	39	86	20	2	1	96	56	76	LG3	19856164	19858609	-	K17710 pentatricopeptide repeat domain-containing protein 1 | (RefSeq) putative pentatricopeptide repeat-containing protein At2g02150 (A)	--	PREDICTED: pentatricopeptide repeat-containing protein At2g01390 [Ipomoea nil]	RecName: Full=Pentatricopeptide repeat-containing protein At2g01390;	SubName: Full=Putative pentatricopeptide repeat-containing protein-like {ECO:0000313|EMBL:JAP34824.1};	FOG: PPR repeat	GO:0043231,intracellular membrane-bounded organelle; GO:0004519,endonuclease activity; GO:0003723,RNA binding; GO:0009451,RNA modification	PF13041.6:PPR repeat family
g12118	0.09	0	0	0	0.1	0	0.66	0.43	1.81	0	0.01	0.21	0	0	0	9	0	0	0	13	0	68	42	176	0	1	23	0	0	0	LG3	19866751	19875059	-	K13457 disease resistance protein RPM1 | (RefSeq) disease resistance protein RPM1-like (A)	ko04626: Plant-pathogen interaction	Retrovirus-related Pol polyprotein from transposon TNT 1-94 [Cajanus cajan]	RecName: Full=Retrovirus-related Pol polyprotein from transposon RE2; AltName: Full=Retro element 2 {ECO:0000303|PubMed:10689195}; Short=AtRE2 {ECO:0000303|PubMed:10689195}; Includes: RecName: Full=Protease RE2; EC=3.4.23.-; Includes: RecName: Full=Reverse transcriptase RE2; EC=2.7.7.49; Includes: RecName: Full=Endonuclease RE2;	SubName: Full=Retrovirus-related Pol polyprotein from transposon TNT 1-94 {ECO:0000313|EMBL:KYP68426.1};	FOG: Transposon-encoded proteins with TYA, reverse transcriptase, integrase domains in various combinations	GO:0004190,aspartic-type endopeptidase activity; GO:0004519,endonuclease activity; GO:0046872,metal ion binding; GO:0003676,nucleic acid binding; GO:0003964,RNA-directed DNA polymerase activity; GO:0015074,DNA integration; GO:0006310,DNA recombination	PF07727.14:Reverse transcriptase (RNA-dependent DNA polymerase)
g1212	5.6	3.7	1.87	51.34	52.57	46.94	11.9	27.92	23.5	59.98	85.27	64.09	81.19	99.68	90.435	124	115	66	1259	1580	1133	277	617	512	1530	2108	1571	2096	2659	2378	LG1	7231008	7232730	+	--	--	CONSTANS-like protein [Ipomoea nil]	RecName: Full=Zinc finger protein CONSTANS-LIKE 2;	SubName: Full=CONSTANS-like protein {ECO:0000313|EMBL:AAG24863.1};	GATA-4/5/6 transcription factors	GO:0005634,nucleus; GO:0003677,DNA binding; GO:0003700,DNA-binding transcription factor activity; GO:0008270,zinc ion binding; GO:0009658,chloroplast organization; GO:0009909,regulation of flower development; GO:0009416,response to light stimulus; GO:0006351,transcription, DNA-templated	PF06203.14:CCT motif
g12120	2.98	5.1	9.97	5.46	7.93	5.07	1.98	5.16	3.91	8.26	6.3	11	4.05	4.85	4.45	103	248	549	209	372	191	72	178	133	329	243	421	163	202	183	LG3	19879635	19882969	-	K12816 pre-mRNA-processing factor 17 | (RefSeq) pre-mRNA-processing factor 17-like (A)	ko03040: Spliceosome	PREDICTED: pre-mRNA-processing factor 17-like [Ipomoea nil]	RecName: Full=COMPASS-like H3K4 histone methylase component WDR5A {ECO:0000303|PubMed:19567704}; Short=AtWDR5A {ECO:0000303|PubMed:19567704};	SubName: Full=pre-mRNA-processing factor 17 isoform X2 {ECO:0000313|RefSeq:XP_009789915.1};	mRNA splicing factor	GO:0005634,nucleus; GO:0048188,Set1C/COMPASS complex; GO:0042393,histone binding; GO:0008168,methyltransferase activity; GO:0010228,vegetative to reproductive phase transition of meristem	PF00400.32:WD domain, G-beta repeat
g12124	11.36	7.14	25.9	7.68	5.15	3.61	6.95	2.54	6.71	14.27	17.06	20.76	8.82	8.64	8.73	179	158	650	134	110	62	115	40	104	259	300	362	162	164	163	LG3	19905294	19912152	+	K01673 carbonic anhydrase [EC:4.2.1.1] | (RefSeq) carbonic anhydrase 2-like (A)	ko00910: Nitrogen metabolism	PREDICTED: carbonic anhydrase 2-like isoform X1 [Ipomoea nil]	RecName: Full=Carbonic anhydrase, chloroplastic; EC=4.2.1.1; AltName: Full=Carbonate dehydratase; Flags: Precursor;	RecName: Full=Carbonic anhydrase {ECO:0000256|RuleBase:RU003956}; EC=4.2.1.1 {ECO:0000256|RuleBase:RU003956}; AltName: Full=Carbonate dehydratase {ECO:0000256|RuleBase:RU003956};	Predicted carbonic anhydrase involved in protection against oxidative damage	GO:0009570,chloroplast stroma; GO:0004089,carbonate dehydratase activity; GO:0008270,zinc ion binding; GO:0015976,carbon utilization	PF00484.19:Carbonic anhydrase
g12125	1.16	0	1.03	0.22	0.08	0	0.02	0	0	0.63	0.83	0.73	0.26	0.22	0.24	53	0	75	11	5	0	1	0	0	33	42	37	14	12	13	LG3	19912214	19920689	+	K00924 kinase [EC:2.7.1.-] | (RefSeq) probable receptor-like protein kinase At5g47070 (A)	--	PREDICTED: cysteine-rich receptor-like protein kinase 2 [Ipomoea nil]	RecName: Full=Cysteine-rich receptor-like protein kinase 2; Short=Cysteine-rich RLK2; EC=2.7.11.-; Flags: Precursor;	SubName: Full=Cysteine-rich receptor-like protein kinase 2 {ECO:0000313|EMBL:KYP44686.1};	--	GO:0016021,integral component of membrane; GO:0005886,plasma membrane; GO:0009506,plasmodesma; GO:0005524,ATP binding; GO:0004674,protein serine/threonine kinase activity; GO:0046777,protein autophosphorylation; GO:0010193,response to ozone	PF07714.17:Protein tyrosine kinase
g12134	2.21	1.94	1.06	0.64	0.95	0.55	0.57	0.52	0.82	0.43	0.02	0.03	2.56	2.44	2.5	115	142	88	37	67	31	31	27	42	26	1	2	155	153	154	LG3	19957575	19962177	+	K12816 pre-mRNA-processing factor 17 | (RefSeq) pre-mRNA-processing factor 17-like (A)	ko03040: Spliceosome	PREDICTED: putative late blight resistance protein homolog R1A-10 [Ipomoea nil]	RecName: Full=Putative late blight resistance protein homolog R1B-16;	SubName: Full=putative late blight resistance protein homolog R1B-8 isoform X2 {ECO:0000313|RefSeq:XP_016537437.1};	mRNA splicing factor	GO:0005737,cytoplasm; GO:0016020,membrane; GO:0043531,ADP binding; GO:0005524,ATP binding; GO:0009626,plant-type hypersensitive response	PF00931.22:NB-ARC domain
g12144	1.6	0.43	2.47	0.3	1.92	0.1	0.11	2.55	0.06	5.38	6.49	5.05	4.7	6.61	5.655	29	11	71	6	47	2	2	46	1	112	131	101	99	144	122	LG3	20022404	20025270	-	K12126 phytochrome-interacting factor 3 | (RefSeq) transcription factor PIF3-like (A)	ko04075: Plant hormone signal transduction; ko04712: Circadian rhythm - plant	PREDICTED: transcription factor BPE-like [Ipomoea nil]	RecName: Full=Transcription factor BHLH094 {ECO:0000305}; AltName: Full=Basic helix-loop-helix protein 94 {ECO:0000303|PubMed:16896230}; Short=OsbHLH094 {ECO:0000303|PubMed:16896230}; AltName: Full=bHLH transcription factor bHLH094 {ECO:0000305};	SubName: Full=transcription factor bHLH79 isoform X1 {ECO:0000313|RefSeq:XP_009776012.1};	--	GO:0005634,nucleus; GO:0003677,DNA binding; GO:0046983,protein dimerization activity; GO:0006355,regulation of transcription, DNA-templated; GO:0006351,transcription, DNA-templated	PF00010.26:Helix-loop-helix DNA-binding domain
g12147	0.48	0.57	0	0.12	0.49	0.82	0	0	0	0	0.17	1.87	0.85	1.16	1.005	15	25	0	4	21	28	0	0	0	0	6	65	31	44	38	LG3	20042946	20045120	-	K13420 LRR receptor-like serine/threonine-protein kinase FLS2 [EC:2.7.11.1] | (RefSeq) LRR receptor-like serine/threonine-protein kinase FLS2 (A)	ko04016: MAPK signaling pathway - plant; ko04626: Plant-pathogen interaction	PREDICTED: DNA-damage-repair/toleration protein DRT100-like [Ipomoea nil]	RecName: Full=MDIS1-interacting receptor like kinase 2 {ECO:0000303|PubMed:26863186}; Short=AtMIK2 {ECO:0000303|PubMed:26863186}; AltName: Full=Probable LRR receptor-like serine/threonine-protein kinase At4g08850; EC=2.7.11.1 {ECO:0000305}; Flags: Precursor;	SubName: Full=LRR receptor-like serine/threonine-protein kinase GSO1 {ECO:0000313|RefSeq:XP_016444764.1};	FOG: Leucine rich repeat	GO:0016021,integral component of membrane; GO:0016020,membrane; GO:0005886,plasma membrane; GO:0009506,plasmodesma; GO:0090406,pollen tube; GO:0005524,ATP binding; GO:0004674,protein serine/threonine kinase activity	PF13855.6:Leucine rich repeat
g1215	1.31	6.27	4	4.49	3.66	3.18	28.11	39.86	20.21	10.59	10.5	1.86	11.18	7.16	9.17	14	94	68	53	53	37	315	424	212	130	125	22	139	92	116	LG1	7248528	7249266	+	--	--	PREDICTED: protein GLUTAMINE DUMPER 2 [Ipomoea nil]	RecName: Full=Protein GLUTAMINE DUMPER 2;	SubName: Full=Uncharacterized protein {ECO:0000313|EMBL:KJB10487.1};	--	GO:0016021,integral component of membrane; GO:0006865,amino acid transport; GO:0080143,regulation of amino acid export	--
g12152	352.41	373.95	380.9	200.51	157.62	184.63	223.81	204.97	207.84	335.68	353.41	346	138.3	166.74	152.52	7506	11191	12923	4728	4555	4285	5009	4355	4354	8234	8401	8155	3433	4277	3855	LG3	20072025	20074335	+	K00799 glutathione S-transferase [EC:2.5.1.18] | (RefSeq) glutathione S-transferase U17-like (A)	ko00480: Glutathione metabolism	PREDICTED: glutathione S-transferase U17-like [Ipomoea nil]	RecName: Full=Glutathione S-transferase U17; Short=AtGSTU17; EC=2.5.1.18; AltName: Full=GST class-tau member 17; AltName: Full=Glutathione S-transferase 30; AltName: Full=Protein EARLY RESPONSIVE TO DEHYDRATION 9;	SubName: Full=glutathione S-transferase U17-like {ECO:0000313|RefSeq:XP_016444082.1};	Glutathione S-transferase	GO:0009507,chloroplast; GO:0005737,cytoplasm; GO:0005829,cytosol; GO:0004364,glutathione transferase activity; GO:0009704,de-etiolation; GO:0006749,glutathione metabolic process; GO:0048527,lateral root development; GO:0080148,negative regulation of response to water deprivation; GO:0040008,regulation of growth; GO:0060416,response to growth hormone; GO:0080167,response to karrikin; GO:0009651,re…	PF02798.20:Glutathione S-transferase, N-terminal domain
[truncated: 17,756 more rows]

## Sheet: TableS5
TableS5 Differential expression genes between W and LY
[truncated: 5,144 more rows]

## Sheet: TableS6
TableS6 Differentially expressed genes between W and Y
[truncated: 4,400 more rows]

## Sheet: TableS7
TableS7 Differentially expressed genes between W and O
[truncated: 5,619 more rows]

[truncated: 11 more sheets: Table S8, Table S9, Table S10, Table S11, Table S12, Table S13, Table S14, Table S15, Table S16, Table S17, Table S18]
